# Supplementary material for: Transcription factor MAFB controls type I and II interferon response-mediated host immunity in Mycobacterium tuberculosis-infected macrophages
Source: Front Microbiol. 2022 Nov 3;13:962306. doi: 10.3389/fmicb.2022.962306 (PMC9670303; doi:10.3389/fmicb.2022.962306)
Supplement: Supplementary file 4 [file Table_2.XLSX]

## Sheet: qlf.mtb_vs_cont
Gene	logFC	logCPM	F	PValue	FDR
CXCL10	4.79776	7.54205	2287.09	0	0
RSAD2	4.67582	8.07204	4509.04	0	0
IFIT1	4.20912	7.79009	4047.33	0	0
IFIT2	4.11293	6.56483	3146.31	0	0
OASL	4.06716	6.14168	2418.74	0	0
TRIM22	3.92852	6.49817	2677.71	0	0
IFI44L	3.89866	6.45248	2441.09	0	0
TNFSF13B	3.81468	5.49576	1616.57	0	0
CMPK2	3.64058	6.98862	2765.95	0	0
SDS	3.45184	6.66179	2269.7	0	0
IFIT3	3.40395	8.19424	3001.66	0	0
MX1	3.27259	6.82572	2278.82	0	0
MX2	3.20746	7.202	2413	0	0
HERC5	3.17821	5.58914	1863.93	0	0
ISG15	3.16622	7.67463	2493.12	0	0
DDX58	3.09983	7.30877	2348.67	0	0
IFITM1	2.68725	7.05691	1673.25	0	0
IFIH1	2.58332	7.45135	1716.53	0	0
EPSTI1	2.45778	7.35408	1549.39	0	0
HELZ2	2.33315	8.50086	1633.25	0	0
OAS2	2.25468	8.439	1548.61	0	0
OAS1	2.3011	7.4658	1435.4	4.12345580537e-313	5.30014014837513e-310
TNFSF10	2.7815	6.21383	1376.71	1.94922e-300	2.39653e-297
IFI44	2.31956	6.65532	1291.8	4.30486e-282	5.0722e-279
SAMD9L	2.12163	7.90624	1278.95	2.57922e-279	2.91741e-276
OAS3	1.9673	9.48281	1278.54	3.16174e-279	3.43876e-276
SIGLEC1	2.20189	7.31996	1264.58	3.29213e-276	3.44796e-273
USP18	2.20776	6.8326	1250.8	3.12544e-273	3.15647e-270
PARP14	1.97813	8.9974	1240.04	6.60055e-271	6.43622e-268
PARP9	2.05152	7.88139	1212.52	5.85841e-265	5.52214e-262
STAT1	1.84037	10.4144	1203.96	4.16035e-263	3.79504e-260
SAMD9	2.08351	7.36399	1192.64	1.16741e-260	1.03163e-257
IRF7	2.18562	6.79022	1175.22	6.8152e-257	5.84001e-254
PNPT1	2.07631	6.83022	1128.92	6.97908e-247	5.80454e-244
IFITM3	1.93717	7.9937	1096.14	8.58733e-240	6.93807e-237
STAT2	1.94673	7.58919	1060.91	3.59034e-232	2.82021e-229
XAF1	2.11806	6.56173	1058.23	1.36403e-231	1.04249e-228
TYMP	2.11064	7.73204	1041.43	5.87754e-228	4.37382e-225
IFI35	1.94271	7.51195	1030.45	1.39278e-225	1.00987e-222
PLSCR1	1.86967	7.7456	1020.38	2.10768e-223	1.49002e-220
HERC6	2.12125	6.14095	1005.7	3.16539e-220	2.18319e-217
SP110	1.92965	7.05908	991.422	3.89196e-217	2.6204e-214
CCL2	2.14539	6.65018	986.023	5.73689e-216	3.77274e-213
IL4I1	2.07258	6.64811	976.999	5.14881e-214	3.30905e-211
GBP4	2.23972	7.1524	969.392	2.28068e-212	1.43318e-209
IFI16	1.69526	8.09882	886.993	1.57342e-194	9.6724e-192
EIF2AK2	1.70541	7.96443	885.621	3.11801e-194	1.87598e-191
ZCCHC2	1.83047	7.1952	885.303	3.6549e-194	2.15319e-191
GDF15	1.78249	7.61916	884.3	6.02625e-194	3.47776e-191
IFIT5	2.29613	5.35292	859.486	1.42505e-188	8.0595e-186
RND3	1.80271	7.0023	848.962	2.71081e-186	1.50307e-183
GBP1	2.09343	8.16264	847.818	4.79519e-186	2.60766e-183
ISG20	3.06069	4.53102	842.247	7.71659e-185	4.11716e-182
BATF2	2.78549	5.07383	833.467	6.15477e-183	3.22305e-180
PARP10	1.64576	7.92843	826.4	2.08991e-181	1.07452e-178
IFI27	2.05868	6.34696	801.576	4.98682e-176	2.51816e-173
UBE2L6	1.71997	7.27676	792.962	3.66425e-174	1.81785e-171
RNF213	1.52861	9.36513	784.406	2.61702e-172	1.27593e-169
LOC100419583	1.67504	7.44579	764.211	6.21992e-168	2.98113e-165
PML	1.67356	7.1507	752.294	2.37861e-165	1.12104e-162
PARP12	1.82133	6.02144	747.999	2.02854e-164	9.40376e-162
TAP1	1.30167	12.1833	739.931	1.13658e-162	5.1839e-160
CXCL11	4.36281	4.79656	727.099	6.86813e-160	3.08281e-157
TRIM25	1.53745	7.77806	713.595	5.80604e-157	2.56536e-154
SHFL	1.74634	6.0228	700.632	3.75068e-154	1.63172e-151
GBP5	1.81291	8.59597	688.994	1.25045e-151	5.35761e-149
FNIP2	1.551	7.77891	687.328	2.87198e-151	1.21215e-148
AXL	1.66524	6.50737	654.125	4.54541e-144	1.89022e-141
CCL8	3.03897	6.37383	641.352	2.67618e-141	1.09677e-138
MARCKS	1.91956	5.09165	636.581	2.8993e-140	1.17123e-137
DTX3L	1.40768	7.93975	615.15	1.28999e-135	5.1378e-133
MYD88	1.46093	6.75049	598.108	6.41511e-132	2.51953e-129
TRIM14	1.40022	7.11575	572.81	1.97642e-126	7.65604e-124
DDX60L	1.31196	8.27363	545.894	1.36941e-120	5.23299e-118
SAT1	1.35972	7.82509	532.33	1.20347e-117	4.53758e-115
TRIM5	1.91369	4.57225	527.36	1.44235e-116	5.36668e-114
LAP3	1.28228	8.59392	518.706	1.09007e-114	4.00326e-112
PPM1K	2.03016	4.35571	518.077	1.49258e-114	5.41117e-112
PLEKHA4	1.8888	4.30404	516.305	3.61902e-114	1.29543e-111
APOL6	1.29734	8.15252	515.983	4.25216e-114	1.50303e-111
ETV7	3.59345	4.61373	510.47	6.6878e-113	2.33478e-110
NCOA7	1.47117	5.9288	507.846	2.48289e-112	8.56234e-110
BCL2A1	1.58146	5.99048	499.702	1.45503e-110	4.95725e-108
TDRD7	1.43586	6.09069	483.372	5.10941e-107	1.72005e-104
AIM2	4.08811	4.67162	480.305	2.36823e-106	7.87868e-104
SECTM1	2.23316	5.93606	477.801	8.28279e-106	2.7235e-103
CCL7	2.27387	5.07796	477.504	9.60705e-106	3.12262e-103
CXCL8	1.29336	8.84239	472.653	1.08644e-104	3.49119e-102
APOL1	1.42865	6.79691	464.253	7.24618e-103	2.30233e-100
SGK1	1.17749	8.7602	443.718	2.08994e-98	6.56659e-96
ZNFX1	1.20904	7.63973	442.894	3.15567e-98	9.80615e-96
CLDN23	2.13986	4.34269	442.679	3.51348e-98	1.07994e-95
TDO2	1.07869	10.0833	420.525	2.28263e-93	6.94067e-91
DDX60	1.26232	6.79848	417.473	1.05062e-92	3.16057e-90
CMTR1	1.18359	7.40175	413.069	9.51296e-92	2.83166e-89
TBC1D2	1.47524	6.03786	412.62	1.19066e-91	3.50723e-89
TAGAP	1.57427	5.36296	403.372	1.21699e-89	3.54783e-87
ATF5	1.16382	7.50596	400.237	5.84191e-89	1.68569e-86
SAMHD1	1.08313	8.78056	390.51	7.59077e-87	2.1682e-84
NR4A3	1.67822	4.85385	379.802	1.61283e-84	4.56077e-82
RTP4	2.01167	4.18666	378.708	2.78904e-84	7.80875e-82
DHX58	1.43694	5.18389	377.647	4.74234e-84	1.31474e-81
SLC26A11	1.2573	6.40343	375.95	1.10881e-83	3.04418e-81
LY6E	0.991342	10.436	371.375	1.09473e-82	2.9766e-80
CSF1	0.995865	10.4608	367.758	6.69186e-82	1.80221e-79
NEAT1	1.12609	7.01706	366.209	1.45302e-81	3.87628e-79
KCP	1.72489	4.36145	363.537	5.53543e-81	1.4629e-78
SLC15A3	1.18845	6.95498	359.377	4.44228e-80	1.16314e-77
CD274	2.74296	5.17794	358.835	5.82492e-80	1.51116e-77
TRANK1	1.14929	6.34274	352.084	1.71037e-78	4.39689e-76
SRC	1.25087	6.06121	343.729	1.12135e-76	2.85673e-74
BHLHE40	1.12758	7.1073	338.624	1.445e-75	3.64837e-73
TIMP3	0.918525	11.0674	335.384	7.31677e-75	1.83101e-72
SOD2	1.02214	8.89686	334.72	1.02039e-74	2.53112e-72
TRIM21	1.14671	6.25832	322.979	3.65007e-72	8.97535e-70
ATF3	1.00606	7.9443	314.797	2.19859e-70	5.35963e-68
GBP3	1.17047	6.4527	314.383	2.70467e-70	6.53485e-68
CEBPB	1.14533	6.84303	314.367	2.7269e-70	6.53485e-68
LAMP3	3.79623	2.21445	313.618	3.96771e-70	9.42849e-68
SP100	1.01579	7.44016	312.361	7.44866e-70	1.75528e-67
CCL20	1.29336	6.51891	310.263	2.12995e-69	4.97774e-67
FBXO32	0.958584	8.05855	290.795	3.66557e-65	8.4963e-63
PHACTR4	1.11493	6.03381	290.759	3.732e-65	8.57995e-63
IFI6	0.882265	9.90272	282.494	2.34797e-63	5.35452e-61
PSMB9	0.906983	9.34816	282.006	2.99802e-63	6.78224e-61
HK2	0.9416	8.7582	281.882	3.19031e-63	7.15997e-61
APOL2	1.1272	6.38634	280.658	5.89051e-63	1.31159e-60
OGFR	0.976789	7.29057	277.976	2.25951e-62	4.99175e-60
ADAR	0.883142	9.52068	273.915	1.72924e-61	3.79066e-59
C16orf70	1.12513	5.84315	273.164	2.51978e-61	5.4811e-59
NT5DC2	-0.98608	6.06709	272.174	4.13909e-61	8.93475e-59
APOBEC3G	1.11997	5.54302	269.249	1.79339e-60	3.84194e-58
IER3	0.945333	8.18127	265.233	1.34229e-59	2.85392e-57
GPNMB	0.899531	8.47031	264.708	1.74631e-59	3.68523e-57
RUBCN	1.0412	6.06943	264.141	2.3202e-59	4.86005e-57
XRN1	0.97128	6.96658	261.108	1.06154e-58	2.20722e-56
OPTN	1.14141	5.94238	259.769	2.07673e-58	4.28654e-56
CD83	1.05598	6.4025	259.562	2.30396e-58	4.72112e-56
N4BP1	0.964185	6.83898	258.68	3.58564e-58	7.29459e-56
CNP	0.909895	7.6127	256.362	1.14623e-57	2.31523e-55
TMEM140	2.62632	3.19682	256.043	1.34479e-57	2.69701e-55
TRIM69	2.1686	4.01766	255.716	1.58458e-57	3.15554e-55
LGALS9	0.869472	8.75003	253.685	4.38696e-57	8.67513e-55
CASP1	1.07961	5.52361	244.431	4.54363e-55	8.92256e-53
SLAMF7	1.36252	4.79797	242.796	1.03162e-54	2.01188e-52
SLC7A11	1.06876	5.98179	241.658	1.82563e-54	3.53596e-52
UBA7	0.904943	6.75794	234.897	5.4226e-53	1.04313e-50
NLRC5	0.871837	7.92093	231.848	2.50251e-52	4.78149e-50
IL1RN	0.768626	10.8457	230.986	3.85658e-52	7.31921e-50
NRIR	3.20269	1.98032	229.953	6.47309e-52	1.22031e-49
SPHK1	0.93215	7.05738	229.605	7.70753e-52	1.4434e-49
STAP1	2.9465	1.60632	225.045	7.59326e-51	1.41265e-48
CXCR4	1.59759	4.13379	222.657	2.51662e-50	4.6513e-48
IFITM2	0.928727	6.31577	221.087	5.53177e-50	1.01576e-47
IGFBP3	0.937546	6.28067	219.941	9.83199e-50	1.79374e-47
HSH2D	2.33345	1.98813	219.294	1.36025e-49	2.46572e-47
FCGBP	-0.974865	5.0407	218.142	2.42452e-49	4.36691e-47
TMEM62	1.04338	5.21035	215.74	8.09268e-49	1.44838e-46
CCL4L2	2.31156	3.62556	214.098	1.84546e-48	3.28213e-46
CHMP5	0.8471	7.43075	214.078	1.86334e-48	3.29322e-46
BST2	0.798189	8.23962	210.06	1.39971e-47	2.45845e-45
IRF9	0.941887	6.04268	208.741	2.71413e-47	4.73766e-45
NT5C3A	1.2117	4.47451	203.873	3.12501e-46	5.42142e-44
PTGER4	0.865668	6.75145	201.36	1.10308e-45	1.90201e-43
PAX5	2.71869	2.07896	199.446	2.88416e-45	4.94292e-43
TRIM26	0.846867	6.7744	198.591	4.43038e-45	7.54713e-43
NPC1	0.82741	7.44081	196.224	1.45394e-44	2.46195e-42
TNFRSF14	0.974354	6.04034	196.062	1.57674e-44	2.654e-42
UNC93B1	0.813348	7.07342	195.038	2.63737e-44	4.41299e-42
SQSTM1	0.753974	9.20718	193.397	6.01266e-44	1.00015e-41
NKAIN1	3.36249	1.45465	191.342	1.68692e-43	2.78964e-41
AP5B1	0.88255	6.6036	191.145	1.86233e-43	3.0618e-41
IGFN1	1.18666	6.64326	191.085	1.91953e-43	3.1376e-41
BLZF1	0.931704	5.70595	187.237	1.32558e-42	2.1543e-40
ATP6V0D2	1.56863	3.02961	184.646	4.87112e-42	7.87117e-40
RASGEF1B	1.26605	4.37862	183.248	9.82855e-42	1.57916e-39
CCL3	1.3369	5.0411	182.049	1.7956e-41	2.8687e-39
LGALS3BP	0.780554	7.44532	181.162	2.80327e-41	4.45342e-39
IRF1	0.819722	7.99716	180.161	4.63474e-41	7.32185e-39
GMPR	1.50701	3.29519	179.532	6.35573e-41	9.98486e-39
DUSP10	0.831202	6.30986	178.876	8.83866e-41	1.38088e-38
ODF3B	2.42797	2.88812	178.785	9.24974e-41	1.43717e-38
RBCK1	0.784583	6.93212	177.477	1.7852e-40	2.75858e-38
WARS1	0.710824	10.2994	175.642	4.4883e-40	6.89784e-38
TFPI2	0.959537	5.12252	175.598	4.58709e-40	7.01156e-38
RGS1	0.716729	8.68901	175.557	4.68226e-40	7.11854e-38
CHIT1	0.853402	7.37809	173.188	1.53989e-39	2.32861e-37
MT2A	0.992086	4.69517	172.482	2.19518e-39	3.30189e-37
NAPA	0.766029	7.2007	172.303	2.4023e-39	3.5943e-37
GALM	0.853731	5.7369	172.264	2.44964e-39	3.64584e-37
MAFF	0.976622	5.48455	170.709	5.35196e-39	7.9237e-37
TMEM123	0.713164	8.37987	170.239	6.77817e-39	9.98297e-37
NCF1	0.950947	5.50459	170.217	6.85388e-39	1.00422e-36
CACNA1E	0.815522	6.04679	167.745	2.37378e-38	3.46009e-36
RBM43	1.01611	4.56128	167.347	2.89947e-38	4.20467e-36
RAB20	1.93406	3.4708	167.194	3.13065e-38	4.51677e-36
GTPBP1	0.764802	7.04931	166.523	4.38653e-38	6.29656e-36
DDIT4L	0.886069	5.29315	165.372	7.82068e-38	1.11693e-35
IRF5	0.838165	6.07559	162.318	3.63156e-37	5.16047e-35
CBLB	0.829208	6.47674	161.786	4.74472e-37	6.70856e-35
ZC3H12A	1.10185	4.53348	159.964	1.18564e-36	1.66803e-34
PLK3	0.969721	5.5238	159.455	1.53127e-36	2.14362e-34
TRIM38	0.898526	5.31176	158.761	2.17042e-36	3.02341e-34
FGD2	1.46158	3.45573	158.173	2.91729e-36	4.04387e-34
NUPR1	1.79845	2.28663	157.039	5.16054e-36	7.11852e-34
G0S2	0.971353	5.41828	156.241	7.70473e-36	1.05764e-33
TMEM251	0.8165	5.8536	155.842	9.42068e-36	1.28695e-33
PALM2AKAP2	0.779929	6.39015	155.776	9.73638e-36	1.32368e-33
FBXO6	1.31147	4.18993	154.68	1.68972e-35	2.28622e-33
SDSL	1.05391	4.55061	154.372	1.97216e-35	2.65566e-33
RASGRP3	0.785683	6.08925	154.027	2.34655e-35	3.14482e-33
ICAM1	0.684257	8.54281	151.808	7.16186e-35	9.55298e-33
TRIM56	0.76287	6.19458	151.747	7.38477e-35	9.80406e-33
NADK	0.750336	6.49504	151.172	9.85991e-35	1.30289e-32
SH3BP5	0.801146	6.71884	150.834	1.16861e-34	1.53702e-32
TAP2	0.611396	10.9977	149.575	2.20184e-34	2.88258e-32
MRAS	0.68151	8.50351	149.291	2.53901e-34	3.30867e-32
TPRA1	0.750386	6.43523	148.597	3.60042e-34	4.67031e-32
LBH	-0.680616	7.2558	147.464	6.36643e-34	8.22054e-32
SSTR2	1.3301	4.46576	146.706	9.32077e-34	1.19806e-31
GBP1P1	3.18028	4.08824	146.71	1.5435e-33	1.97498e-31
HMOX1	0.665583	8.45947	145.483	1.72429e-33	2.19637e-31
MLKL	0.914017	5.22477	144.924	2.28477e-33	2.89725e-31
LRP12	0.677529	7.96466	144.611	2.67361e-33	3.37519e-31
LINC01050	2.33817	2.15416	144.026	3.58996e-33	4.51186e-31
TRAF1	0.898838	5.2095	140.627	1.98469e-32	2.48332e-30
RPS6KA2	0.679375	7.54272	140.193	2.46938e-32	3.07617e-30
SLC25A28	1.02424	4.38543	139.765	3.06292e-32	3.79883e-30
GEM	0.760739	6.64085	138.97	4.5697e-32	5.64288e-30
CD14	-0.700664	6.7868	138.292	6.42801e-32	7.90309e-30
PPP1R15A	0.707432	6.62931	137.631	8.96447e-32	1.09739e-29
APOBEC3F	1.12186	3.84478	137.587	9.16647e-32	1.11728e-29
BISPR	1.10597	3.87784	136.549	1.54502e-31	1.87511e-29
PIM3	0.768686	6.14814	136.205	1.83771e-31	2.2208e-29
LILRB3	1.04036	5.45728	135.293	2.9079e-31	3.49913e-29
RELB	0.905854	5.10678	134.255	4.90198e-31	5.86097e-29
LYSMD2	1.12343	3.70467	134.251	4.91212e-31	5.86097e-29
NEXN	3.82627	-0.0927743	131.968	1.5508e-30	1.84259e-28
NFKBIA	0.721833	6.29382	130.198	3.77972e-30	4.47209e-28
B4GALT5	0.705828	6.55912	130.035	4.10399e-30	4.83553e-28
THEMIS2	0.722972	6.09176	127.514	1.46015e-29	1.71329e-27
ZMIZ1-AS1	1.05534	4.00521	127.079	1.81759e-29	2.12388e-27
ANKFY1	0.691082	6.35823	126.61	2.3019e-29	2.67873e-27
LGALS8	0.637978	7.67485	126.105	2.96917e-29	3.44108e-27
S100A9	-1.04488	5.77196	125.769	3.51652e-29	4.05878e-27
CSRNP1	0.718123	6.18892	125.611	3.80739e-29	4.37664e-27
ABL2	0.645079	7.72192	125.584	3.85936e-29	4.41842e-27
LINC02009	1.92289	3.77962	124.977	5.23879e-29	5.97348e-27
BCL3	0.961346	4.7528	124.814	5.68825e-29	6.45993e-27
ZC3HAV1	0.658735	6.81474	124.061	8.31186e-29	9.40171e-27
GBP2	1.02487	6.9019	122.785	1.58078e-28	1.78093e-26
TMEM229B	0.770981	5.46083	122.636	1.70418e-28	1.91233e-26
NMI	0.716191	5.99143	120.704	4.50917e-28	5.03994e-26
MFSD12	0.593465	9.38799	120.571	4.82159e-28	5.36791e-26
MAF	0.721992	5.96296	119.38	8.78528e-28	9.74235e-26
COL22A1	0.674812	6.36593	119.326	9.02899e-28	9.97351e-26
CITED4	0.657467	6.80293	119.316	9.07554e-28	9.98592e-26
STX11	1.08907	4.50186	119.085	1.01935e-27	1.11725e-25
RNF19B	0.827315	5.39241	117.977	1.78131e-27	1.94486e-25
ABCG2	1.45639	3.29191	117.969	1.78917e-27	1.94593e-25
LOXL4	-0.664186	5.8088	117.775	1.97252e-27	2.13712e-25
ADPRS	0.878589	4.59925	117.723	2.02531e-27	2.18594e-25
SPSB1	0.639436	7.14951	115.473	6.29417e-27	6.76755e-25
TGFBR2	-0.633825	6.75023	115.303	6.85724e-27	7.34504e-25
ITGAX	0.583516	8.86248	115.289	6.90485e-27	7.36813e-25
ANTXR1	-0.670906	5.48239	114.937	8.24672e-27	8.76695e-25
FOSL2	0.612949	7.43847	114.653	9.51244e-27	1.00746e-24
PATL1	0.659997	6.33294	114.431	1.06388e-26	1.12255e-24
ZBTB43	0.683149	6.16729	114.222	1.18249e-26	1.24306e-24
DAPP1	0.826974	4.83607	113.268	1.91278e-26	2.00332e-24
MGLL	0.609401	7.88235	113.105	2.07633e-26	2.16659e-24
ALOX5AP	-0.633407	6.53088	112.698	2.54848e-26	2.64102e-24
NCF1C	0.966103	4.34496	112.697	2.54968e-26	2.64102e-24
ERFE	0.876632	4.19873	112.475	2.85196e-26	2.94335e-24
TOR1B	0.719426	5.34632	112.426	2.924e-26	3.00673e-24
IDO1	2.7388	5.51891	118.4	5.07815e-26	5.2029e-24
PSMB8	0.532312	10.7041	111.115	5.66236e-26	5.78051e-24
GOLGA8N	-0.660445	5.54294	110.896	6.32337e-26	6.43209e-24
ZFYVE26	0.66544	6.18035	110.84	6.50274e-26	6.59084e-24
IPCEF1	-0.630262	6.0674	110.5	7.7183e-26	7.79493e-24
PLEK	0.549647	10.0312	110.327	8.42411e-26	8.47747e-24
RHBDF2	0.636612	6.99619	109.717	1.14596e-25	1.14913e-23
DENND2D	0.774786	5.18862	109.519	1.26626e-25	1.26528e-23
RGCC	0.625149	6.92544	108.985	1.65746e-25	1.65034e-23
ZCCHC14	0.604889	7.22474	108.968	1.67169e-25	1.65867e-23
NAGK	0.70384	5.45294	108.708	1.90521e-25	1.88376e-23
CEMIP2	-0.635484	6.34225	108.516	2.09896e-25	2.0681e-23
OLIG1	1.99613	1.37526	108.465	2.15352e-25	2.11448e-23
CX3CR1	-0.833709	3.98029	108.375	2.25427e-25	2.20575e-23
GNB4	0.623998	6.44013	108.153	2.52114e-25	2.45838e-23
CXCL16	0.889591	4.89443	107.9	2.86481e-25	2.78389e-23
VSIG10L	1.75872	1.76721	107.518	3.4725e-25	3.36285e-23
ARL8B	0.587872	7.77279	107.305	3.86567e-25	3.73084e-23
MOV10	0.570482	8.20193	106.73	5.16631e-25	4.96915e-23
ACO1	-0.706767	5.49977	105.757	8.43911e-25	8.08953e-23
ABCD1	0.614828	7.24	105.688	8.74061e-25	8.35024e-23
MMRN2	-0.760114	4.46437	105.641	8.9489e-25	8.52043e-23
APOC1	0.578872	8.56035	105.567	9.28953e-25	8.81508e-23
CCR1	0.562656	8.32268	104.412	1.66382e-24	1.57356e-22
HSPA1B	0.563103	8.29539	104.405	1.66986e-24	1.57401e-22
ACP5	0.695989	6.30116	104.23	1.82398e-24	1.71357e-22
JUN	0.594298	7.47488	103.583	2.52733e-24	2.36649e-22
TFEC	0.686829	6.02057	103.131	3.17559e-24	2.96367e-22
KCNQ3	-1.05853	2.94061	102.645	4.05664e-24	3.77348e-22
BCAT1	0.614462	6.63189	101.68	6.60051e-24	6.11964e-22
DUSP1	0.900823	4.48198	101.249	8.20668e-24	7.58394e-22
TRADD	0.939988	4.08523	100.766	1.04705e-23	9.64447e-22
NUB1	0.661323	6.10408	100.365	1.28173e-23	1.17333e-21
SORL1	-0.646523	5.31945	100.365	1.28212e-23	1.17333e-21
NCF1B	0.974542	4.04921	100.057	1.49747e-23	1.36272e-21
SHOX2	0.594633	7.02027	100.055	1.49871e-23	1.36272e-21
WASHC4	0.606049	6.70158	99.651	1.83808e-23	1.66594e-21
HSPA1A	0.562358	7.78573	99.5757	1.90932e-23	1.72498e-21
MSC	0.696754	5.95251	99.4476	2.03685e-23	1.83433e-21
REC8	1.14747	3.1032	99.2362	2.26612e-23	2.03433e-21
TUBA4A	-0.623158	5.96387	98.8008	2.82314e-23	2.52636e-21
MMP19	0.583479	6.96627	98.6522	3.04296e-23	2.71447e-21
GOLGA8Q	-1.04938	2.95099	98.0977	4.02579e-23	3.57991e-21
PLA2G7	1.23349	3.79862	98.0594	4.10435e-23	3.63834e-21
BHLHE41	1.1141	3.83789	96.4554	9.22387e-23	8.15101e-21
TNFAIP3	0.629634	6.00946	96.3855	9.55532e-23	8.41761e-21
HESX1	1.99038	1.31763	95.9458	1.19302e-22	1.04771e-20
OLIG2	1.28341	3.13402	95.9161	1.21105e-22	1.06025e-20
SLC11A2	0.623651	6.16923	95.7091	1.34452e-22	1.17347e-20
MXD1	0.682462	6.04041	95.6631	1.37606e-22	1.1973e-20
KYNU	0.753517	5.44912	95.2554	1.69067e-22	1.46652e-20
JUNB	0.590849	6.92793	94.9706	1.95212e-22	1.68813e-20
RTN4R	0.78214	5.43994	94.9507	1.97182e-22	1.69997e-20
CSTB	0.542761	8.08563	94.8675	2.05638e-22	1.76749e-20
ZC3H12D	0.868589	3.71688	94.8218	2.10444e-22	1.80331e-20
CPEB2	0.561572	7.53081	94.1042	3.02354e-22	2.57714e-20
CKB	0.787583	4.80168	94.1027	3.02571e-22	2.57714e-20
ATP6V1H	0.565921	7.41596	93.7463	3.6224e-22	3.0761e-20
LGALS3	0.535856	8.32328	93.5954	3.90929e-22	3.30978e-20
STX17	0.642194	5.71609	93.4585	4.18923e-22	3.53621e-20
PYROXD2	-0.71202	4.46855	93.0817	5.06735e-22	4.26472e-20
CTSB	0.444067	12.6253	93.0119	5.24906e-22	4.40453e-20
SLC17A5	0.54188	7.82132	92.8819	5.6054e-22	4.68963e-20
KMO	1.13307	2.98055	92.7346	6.0383e-22	5.03691e-20
CXCL13	1.89956	1.50527	92.7106	6.1119e-22	5.0833e-20
CHROMR	0.893353	3.71132	91.2506	1.27774e-21	1.05959e-19
GIMAP2	0.811403	4.52784	91.1544	1.34137e-21	1.10911e-19
ITGB3	0.592744	6.4057	91.0174	1.43751e-21	1.18513e-19
BASP1	0.665893	5.93315	90.9425	1.49296e-21	1.22727e-19
CTSL	0.459552	11.5536	89.4816	3.1232e-21	2.55994e-19
SHISA5	0.524272	8.06239	89.4334	3.20023e-21	2.61549e-19
NFKB2	0.629793	5.75838	89.2838	3.4515e-21	2.81272e-19
GTPBP2	0.547619	7.0612	89.2103	3.58209e-21	2.91076e-19
TTC21A	1.68501	1.35831	89.0545	3.87543e-21	3.14009e-19
ADM	1.07413	3.26853	88.8638	4.26745e-21	3.44786e-19
RHOU	-0.702943	4.79172	88.7441	4.53357e-21	3.65243e-19
GSDMD	0.535974	7.50401	88.0677	6.38081e-21	5.12604e-19
ENDOD1	0.764455	4.79797	87.9503	6.77094e-21	5.42404e-19
FBXO39	2.25132	1.27217	87.6697	7.80259e-21	6.23281e-19
POR	0.586777	6.10669	87.1221	1.02905e-20	8.19702e-19
PDCD1LG2	1.02155	3.91004	86.4768	1.4259e-20	1.13263e-18
RRBP1	0.55979	6.70119	86.0932	1.73097e-20	1.37111e-18
PSME2	0.526591	8.15149	85.9125	1.89656e-20	1.49807e-18
NAMPT	0.571746	7.45783	85.5256	2.30619e-20	1.81656e-18
FMR1	0.602849	5.80111	85.4178	2.43537e-20	1.91299e-18
ARMCX1	0.634098	5.33935	84.2015	4.50429e-20	3.52832e-18
CD68	0.516629	7.8168	83.9629	5.08194e-20	3.96981e-18
CXCL1	1.91498	2.381	83.7662	5.61312e-20	4.37266e-18
SPRED1	-0.532029	6.78262	83.5025	6.41382e-20	4.9827e-18
PCGF5	0.63207	5.54767	83.2323	7.35296e-20	5.69663e-18
ASAH1	0.486643	9.28243	83.1521	7.65718e-20	5.91612e-18
P3H2	1.04767	3.65244	82.9361	8.54131e-20	6.58123e-18
APOE	0.500622	8.87786	82.842	8.95727e-20	6.88298e-18
NABP1	0.619141	5.93151	82.6598	9.8219e-20	7.52693e-18
MYO5A	-0.523578	6.93629	82.3316	1.15953e-19	8.86197e-18
GCNT4	1.8396	1.9564	82.1775	1.25351e-19	9.5544e-18
EDEM1	0.506266	8.0131	81.9496	1.40669e-19	1.06931e-17
DYNLT1	0.553329	6.92734	81.7604	1.54794e-19	1.17353e-17
WHRN	0.788499	4.2826	81.5968	1.68145e-19	1.27134e-17
FAM89A	0.816662	4.41526	81.2588	1.99496e-19	1.50436e-17
SORT1	-0.519435	7.22499	80.8017	2.51397e-19	1.89069e-17
RAB8B	0.53893	6.54163	80.5495	2.85609e-19	2.14229e-17
LRRC8C	-0.541743	6.31762	80.3689	3.12922e-19	2.34095e-17
PRKAG2	0.913496	3.68524	79.8276	4.11507e-19	3.07034e-17
TRAFD1	0.591219	6.08387	79.7765	4.22278e-19	3.14242e-17
CFB	0.965816	4.84992	79.6685	4.4599e-19	3.31016e-17
EXOC3L1	3.59582	0.746531	79.0339	6.14879e-19	4.55171e-17
NBPF19	0.504789	7.45972	79.0142	6.21011e-19	4.58511e-17
AZI2	0.582475	5.66979	78.9383	6.45334e-19	4.75228e-17
MNDA	1.16748	2.80116	78.3255	8.79943e-19	6.46313e-17
TENT5A	0.496495	7.92213	78.2093	9.33277e-19	6.8371e-17
ENAH	-0.723887	4.38967	77.9528	1.06263e-18	7.7646e-17
ZNF107	0.714051	4.25299	77.8554	1.1163e-18	8.13579e-17
SMCR8	0.553908	6.3151	77.6926	1.21216e-18	8.81171e-17
GRINA	0.480935	8.42306	77.3581	1.4358e-18	1.04107e-16
TTC39B	0.569663	6.15415	77.3437	1.44631e-18	1.04601e-16
TNFSF14	0.533442	6.82544	77.0881	1.64607e-18	1.18735e-16
DYRK3	0.810348	4.08844	77.0832	1.65014e-18	1.18735e-16
CERK	-0.572448	5.46433	77.0204	1.70343e-18	1.22258e-16
PREX1	-0.511116	6.71479	76.9495	1.76564e-18	1.26402e-16
RICTOR	0.57721	5.63034	76.7747	1.92906e-18	1.37752e-16
MMP7	0.524991	6.57491	76.5401	2.17222e-18	1.54725e-16
PANX1	0.576333	5.88494	76.3526	2.38856e-18	1.69707e-16
SLFN5	0.54307	6.21871	76.2824	2.47494e-18	1.75404e-16
ZNF697	0.498518	7.6754	76.1065	2.70536e-18	1.91255e-16
CCRL2	0.931547	4.52412	75.9505	2.92769e-18	2.06457e-16
MASTL	0.631499	4.83181	75.7838	3.1855e-18	2.24078e-16
RAB24	0.677137	4.64094	75.6972	3.32833e-18	2.33544e-16
KLF4	-0.922668	2.92493	75.6909	3.33891e-18	2.33707e-16
IL15RA	1.52911	3.23252	75.2009	4.27906e-18	2.98773e-16
LINC01010	0.671417	5.81378	75.1502	4.39025e-18	3.05782e-16
PLEKHM1	0.497971	7.37153	75.0879	4.53104e-18	3.14813e-16
ACSL1	0.500128	7.81735	75.0501	4.6185e-18	3.20102e-16
SMIM3	0.644865	5.13815	75.0088	4.71619e-18	3.26074e-16
RIPK2	0.670981	5.09208	74.7642	5.33809e-18	3.68172e-16
ITGAL	-0.524938	6.39274	74.6435	5.67439e-18	3.90415e-16
SPATS2L	0.506428	7.02718	74.4073	6.39554e-18	4.38964e-16
UPP1	0.530347	6.71101	74.2077	7.0757e-18	4.84471e-16
ISM1	1.08991	2.82596	74.1527	7.27564e-18	4.96958e-16
SP140L	0.583394	5.45828	73.8835	8.3382e-18	5.68163e-16
ZNF385A	0.530299	6.70344	73.0491	1.2723e-17	8.64861e-16
TLR3	3.07572	-0.278666	72.9782	1.31883e-17	8.94337e-16
MAP2K3	0.566647	6.06113	72.9166	1.36064e-17	9.2048e-16
RGS16	0.48235	7.95353	72.7538	1.47759e-17	9.97216e-16
RRAGD	0.569459	5.50746	72.1853	1.97077e-17	1.32689e-15
UCN2	0.743033	4.6953	71.8941	2.28393e-17	1.53408e-15
RGL1	0.913416	3.43679	71.8427	2.34422e-17	1.57085e-15
TAPBP	0.414804	11.3638	71.7315	2.48013e-17	1.65799e-15
RAB1A	0.477936	8.17229	71.6711	2.55722e-17	1.7055e-15
P2RX7	0.992787	4.42436	71.6658	2.56404e-17	1.70603e-15
KIAA0040	0.686608	5.1087	71.4688	2.83312e-17	1.88063e-15
RAB39A	0.988202	3.21821	71.4271	2.89368e-17	1.91633e-15
CLSTN2	-0.549531	5.73488	71.3157	3.06167e-17	2.02285e-15
ATP6V1B2	0.457592	9.09419	71.2929	3.09725e-17	2.04159e-15
SRGAP2	0.486362	7.26657	71.1882	3.266e-17	2.14781e-15
EPHB2	1.42256	1.97567	71.088	3.43604e-17	2.25439e-15
AGRN	0.454049	8.59677	70.2908	5.14649e-17	3.3688e-15
TM4SF19	0.518154	6.84522	69.8295	6.50168e-17	4.24606e-15
FZD5	0.866703	3.98151	69.8108	6.56376e-17	4.27673e-15
CHRM3	-0.867796	2.78971	69.737	6.81401e-17	4.42957e-15
LACTB	0.52906	6.41905	69.6723	7.04116e-17	4.56674e-15
TESK2	1.02895	2.98634	69.6131	7.2554e-17	4.69493e-15
IER5L	0.530827	6.11114	69.6037	7.29014e-17	4.70235e-15
THRA	0.687253	4.82379	69.601	7.30013e-17	4.70235e-15
CFLAR	0.485468	7.38416	69.5612	7.44884e-17	4.78723e-15
BMP8B	-0.511304	5.82563	69.3776	8.17547e-17	5.24231e-15
NEURL3	5.69674	-0.761409	69.2331	8.79635e-17	5.62767e-15
LIPG	1.23032	3.59816	68.7381	1.13053e-16	7.21653e-15
CLIP4	0.662025	5.37957	68.518	1.26395e-16	8.05e-15
GCLC	0.513294	6.63193	68.5007	1.2751e-16	8.10277e-15
RALA	0.516178	6.64058	68.4687	1.29597e-16	8.21689e-15
LITAF	0.505144	6.7339	68.0418	1.60914e-16	1.01797e-14
GADD45B	0.857133	3.43349	67.9633	1.67446e-16	1.05693e-14
HOPX	-0.615121	4.60233	67.7867	1.8313e-16	1.15335e-14
IQGAP2	0.612898	5.09311	67.6546	1.95817e-16	1.23052e-14
PPARGC1B	0.557709	5.94361	67.6314	1.98135e-16	1.24232e-14
ADCY8	0.502013	6.7983	67.6122	2.0007e-16	1.25168e-14
RNF31	0.531387	5.89404	67.5764	2.03736e-16	1.2718e-14
IL10RA	0.537842	6.47705	67.4589	2.16236e-16	1.34686e-14
TNK2	0.520425	5.96029	67.0842	2.61486e-16	1.62512e-14
DPP4	1.04355	3.47256	66.9591	2.78623e-16	1.72783e-14
AGAP3	0.495754	6.7814	66.6478	3.26264e-16	2.01884e-14
HLA-E	0.405129	11.0401	66.5156	3.48891e-16	2.15414e-14
RRAD	0.916644	5.24528	66.1215	4.26081e-16	2.62499e-14
SERPING1	1.03128	5.62209	66.0544	4.40835e-16	2.70998e-14
NOTCH2	0.43859	8.80825	65.9282	4.69961e-16	2.88277e-14
KIAA0754	-0.738788	3.6224	65.8519	4.88505e-16	2.99003e-14
MLLT6	0.457084	7.72746	65.7404	5.16936e-16	3.15722e-14
CIR1	0.601375	5.20516	65.4426	6.01241e-16	3.6642e-14
RASA1	-0.454078	7.3501	65.391	6.17181e-16	3.75326e-14
BRI3	0.507378	6.15937	65.3261	6.37833e-16	3.86378e-14
MICB	0.501526	6.61893	65.3253	6.38088e-16	3.86378e-14
CHST15	0.488607	6.93228	65.2888	6.50042e-16	3.92776e-14
AMDHD2	0.623303	4.55142	65.2808	6.52665e-16	3.9352e-14
GIMAP8	0.766199	4.95295	65.272	6.55595e-16	3.94445e-14
LONRF3	0.687376	4.65141	65.1749	6.88689e-16	4.13477e-14
ZBED1	0.482196	6.60119	64.8788	8.00312e-16	4.79475e-14
TMEM144	0.656135	4.46843	64.8407	8.1595e-16	4.8781e-14
BIRC3	1.22987	2.56006	64.6938	8.79076e-16	5.24441e-14
SLC41A2	0.76497	4.2376	64.6338	9.06246e-16	5.39512e-14
RFLNB	-0.522067	5.40767	64.6295	9.08237e-16	5.39562e-14
CLCN7	0.45307	7.84445	64.5487	9.46258e-16	5.6097e-14
HIVEP2	0.676696	5.01919	64.3282	1.05824e-15	6.26046e-14
NBN	0.493498	6.56338	64.3001	1.07346e-15	6.33725e-14
RRAGC	0.52494	5.71295	64.2107	1.12324e-15	6.61729e-14
CERT1	0.51021	6.19102	64.1638	1.15033e-15	6.7628e-14
LGMN	0.897508	3.49549	64.0003	1.24981e-15	7.3324e-14
PLK2	-0.848277	2.96026	63.5671	1.55708e-15	9.11617e-14
CPNE2	-0.451754	7.07751	63.5254	1.59043e-15	9.29219e-14
TNS3	0.422612	9.507	63.4047	1.69087e-15	9.85865e-14
MUC1	0.965324	3.50891	63.381	1.71136e-15	9.9576e-14
MREG	0.855874	4.15452	63.176	1.89899e-15	1.10266e-13
ZFP36L2	0.468018	7.45189	63.1333	1.94064e-15	1.12454e-13
CYP27B1	0.800057	4.63045	62.9058	2.17814e-15	1.25958e-13
TNPO1	0.432214	8.68755	62.8578	2.23183e-15	1.28799e-13
LENG8	0.424244	9.13268	62.7309	2.38039e-15	1.37093e-13
SWT1	0.867921	3.70628	62.7164	2.39793e-15	1.37823e-13
SLC11A1	0.518501	6.65008	62.4472	2.74909e-15	1.57685e-13
HLA-DMB	0.92507	6.6662	62.3851	2.83702e-15	1.62399e-13
CTSD	0.388678	11.2383	62.3548	2.88108e-15	1.64588e-13
UGCG	0.495627	6.25082	62.3327	2.91352e-15	1.66106e-13
JAG1	-0.524257	5.15629	62.0272	3.4024e-15	1.93587e-13
ITM2C	-0.440296	7.36901	61.9946	3.45908e-15	1.96417e-13
UAP1L1	0.454606	7.09019	61.6951	4.0272e-15	2.28219e-13
ST8SIA5	-0.821394	2.96028	61.6431	4.13492e-15	2.33854e-13
STARD13	0.585929	5.01804	61.4926	4.46333e-15	2.51924e-13
MEGF6	0.530285	5.39151	61.4036	4.66956e-15	2.6304e-13
PDE4B	1.03132	2.97105	61.1512	5.30806e-15	2.98412e-13
MALAT1	0.458524	6.98973	60.9968	5.7411e-15	3.22116e-13
FTH1	0.368036	12.0964	60.626	6.9307e-15	3.88092e-13
UST	-0.518115	5.13153	60.4554	7.55778e-15	4.22369e-13
TNFRSF10A	0.612753	4.97524	60.4134	7.72074e-15	4.30626e-13
NCF2	0.583683	6.10861	60.3188	8.10072e-15	4.5093e-13
KCTD7	0.788264	3.49146	60.2907	8.2175e-15	4.56531e-13
IFNGR1	-0.432616	7.6141	60.2623	8.33656e-15	4.62238e-13
LPXN	0.518382	5.62726	60.1376	8.88189e-15	4.91511e-13
PHLDA3	0.564797	5.64003	60.1102	9.00611e-15	4.97412e-13
NDRG4	1.8828	1.75714	60.0666	9.20786e-15	5.07563e-13
PPIF	0.420548	8.81157	60.0269	9.39564e-15	5.16906e-13
RPLP0P2	0.619414	5.22065	59.9499	9.77044e-15	5.36483e-13
GUCY1A2	0.837463	3.00827	59.6591	1.13254e-14	6.20657e-13
FANCA	0.519564	5.28101	59.6432	1.14172e-14	6.24226e-13
ANKRD45	1.39376	1.789	59.6402	1.14346e-14	6.24226e-13
STX4	0.467331	7.03141	59.5749	1.18206e-14	6.44053e-13
MGAT1	0.421142	8.5135	59.4473	1.26124e-14	6.85874e-13
PLA2G4C	0.544465	5.70326	59.2212	1.41475e-14	7.67875e-13
DCP1A	0.502049	5.84355	58.8836	1.67949e-14	9.09819e-13
PKDCC	-0.552189	4.70767	58.8745	1.68725e-14	9.12275e-13
PLAGL1	0.545703	5.35	58.8092	1.74416e-14	9.41247e-13
LRFN5	0.87064	3.40211	58.2386	2.3308e-14	1.25544e-12
NPIPA5	0.731042	3.62764	58.2173	2.35615e-14	1.26668e-12
KANK1	0.473642	6.44277	58.0615	2.5503e-14	1.36845e-12
SCO2	0.641982	4.8497	58.039	2.57959e-14	1.38154e-12
GM2A	0.415578	9.2061	57.919	2.74183e-14	1.46566e-12
ARMC9	0.46129	6.53643	57.8635	2.82023e-14	1.50473e-12
SLC29A3	0.533468	6.18816	57.7629	2.96825e-14	1.58072e-12
SPNS2	-0.468157	5.82497	57.3782	3.6092e-14	1.91844e-12
IRAK2	0.815756	3.37641	57.3036	3.74882e-14	1.98891e-12
WDFY1	0.455318	6.67561	57.0458	4.2736e-14	2.26309e-12
PCLO	-0.628672	4.16798	57.006	4.36108e-14	2.3051e-12
TRAF3IP2	0.529962	5.45854	56.9127	4.57283e-14	2.41251e-12
SLC2A6	0.665311	4.37554	56.892	4.62121e-14	2.43349e-12
GOLGA7B	0.697056	3.94118	56.8164	4.80219e-14	2.52409e-12
GPATCH11	-0.574413	4.72322	56.7788	4.89491e-14	2.5658e-12
INHBA	0.671131	5.88542	56.7769	4.89968e-14	2.5658e-12
TREML2	-1.03213	1.83544	56.7303	5.01727e-14	2.62252e-12
UBC	0.348518	12.4848	56.5849	5.40209e-14	2.81846e-12
NR1H3	0.754092	5.45062	56.4167	5.88431e-14	3.06439e-12
HES4	3.09586	-0.196823	56.3379	6.1249e-14	3.18382e-12
SLC9A7	-0.450271	6.40559	56.1965	6.58144e-14	3.41486e-12
RHOQ	0.498119	5.79307	56.1889	6.60719e-14	3.42194e-12
GTF2E2	0.507193	5.54071	55.9792	7.35032e-14	3.79986e-12
HEXD	0.698675	4.14403	55.9157	7.59164e-14	3.91745e-12
GJB2	1.09918	2.80126	55.8702	7.76947e-14	3.99839e-12
BCL2L13	0.450285	6.57634	55.8683	7.77677e-14	3.99839e-12
SLC1A3	0.430165	7.30588	55.3475	1.01352e-13	5.20152e-12
TES	-0.558521	4.60584	55.3379	1.01849e-13	5.21754e-12
HSD3B7	0.50716	6.06932	55.2948	1.04105e-13	5.32347e-12
TMBIM1	0.427749	7.31946	55.2466	1.06688e-13	5.4457e-12
CNN2	-0.4227	7.13714	54.9585	1.23529e-13	6.29399e-12
KITLG	0.522629	5.21735	54.9504	1.24038e-13	6.30854e-12
RAB5IF	0.660211	4.25578	54.9002	1.27249e-13	6.46023e-12
CD82	0.458569	6.52517	54.554	1.5175e-13	7.69031e-12
PCDH12	-0.717057	3.60638	54.4498	1.60012e-13	8.09449e-12
C4orf33	0.719603	3.5301	54.3763	1.66112e-13	8.38806e-12
SGTB	0.481788	5.74736	54.2074	1.81016e-13	9.12435e-12
FOSL1	0.540043	5.18419	54.1141	1.89815e-13	9.55089e-12
TMEM154	-0.580858	4.38275	54.1037	1.90825e-13	9.58463e-12
SQOR	0.395134	9.02413	53.4785	2.62301e-13	1.31513e-11
GOLGA8O	-0.51068	4.78698	52.9823	3.37659e-13	1.68997e-11
TRIM47	1.00458	2.52306	52.7332	3.83296e-13	1.91499e-11
METTL1	0.683886	4.2997	52.488	4.34251e-13	2.16574e-11
PLEKHO2	0.399912	8.12575	52.4562	4.41345e-13	2.19724e-11
CEMIP	0.441141	6.04827	52.4147	4.50757e-13	2.24016e-11
EMP3	0.422911	7.11895	52.3839	4.57895e-13	2.27164e-11
LILRA6	0.963099	3.26977	52.3012	4.7759e-13	2.3652e-11
TOP2A	-0.399872	7.5371	52.1135	5.25464e-13	2.59774e-11
GAPT	-0.727561	3.04714	52.0268	5.49195e-13	2.71032e-11
TCIRG1	0.389838	8.81323	51.9635	5.67186e-13	2.79423e-11
TMEM106A	0.489967	5.50623	51.7131	6.44294e-13	3.16858e-11
SEMA3C	0.59372	5.12196	51.6576	6.62775e-13	3.25381e-11
GSDME	0.60795	4.6617	51.2194	8.28481e-13	4.06027e-11
CORO1A	-0.382334	9.00131	50.9709	9.40272e-13	4.60018e-11
CARD16	0.740867	3.50598	50.8873	9.81143e-13	4.79184e-11
KLHL38	1.59051	0.837282	50.4118	1.25007e-12	6.09474e-11
RGS20	1.02527	3.22699	50.3407	1.29615e-12	6.30854e-11
TRIM54	0.597533	4.9019	50.3018	1.32211e-12	6.42384e-11
RHOBTB3	0.446318	6.45783	50.2945	1.32705e-12	6.43677e-11
CYP2J2	1.87125	0.150484	50.0369	1.51318e-12	7.32699e-11
KLF6	0.404412	7.28815	49.9782	1.55912e-12	7.53656e-11
TMEM138	0.559618	4.69099	49.9063	1.61726e-12	7.80423e-11
EFR3A	0.40312	7.753	49.8867	1.63356e-12	7.86945e-11
MAFK	0.4968	5.38119	49.8319	1.67976e-12	8.07827e-11
MARCKSL1	-0.426983	6.32299	49.7998	1.70743e-12	8.1974e-11
COL7A1	0.421716	7.01565	49.7945	1.71205e-12	8.20565e-11
KIF21B	-0.402611	7.09447	49.3207	2.17965e-12	1.04291e-10
TRIM2	-0.429212	5.97176	49.2989	2.20398e-12	1.05277e-10
ABCA1	0.380944	9.15352	49.2743	2.23184e-12	1.06428e-10
APOL3	1.05413	3.08856	48.9656	2.61209e-12	1.24351e-10
MAP3K1	-0.472634	5.22689	48.9371	2.65026e-12	1.25957e-10
ADPRH	0.508901	5.27827	48.5929	3.15872e-12	1.4987e-10
CTSS	0.373194	9.3371	48.5117	3.29222e-12	1.55942e-10
ATP6V1C2	0.442587	5.47207	48.3802	3.52044e-12	1.66473e-10
SEMA4C	-0.461969	5.43679	48.2427	3.77615e-12	1.78267e-10
KLHL4	-0.464809	5.4201	48.125	4.00955e-12	1.8897e-10
ZBTB42	0.744362	3.32799	47.9954	4.28344e-12	2.01542e-10
TMEM171	3.34606	-0.501293	47.8536	4.60464e-12	2.16296e-10
AMPD3	0.427889	6.27949	47.7379	4.88472e-12	2.29072e-10
MAP3K20	-0.432762	5.71137	47.4694	5.60136e-12	2.62244e-10
OTUD4	0.403203	7.24374	47.4099	5.77403e-12	2.69845e-10
KCNJ2	-0.468898	5.43093	47.4069	5.78281e-12	2.69845e-10
EXOSC9	0.503787	4.77282	47.207	6.40373e-12	2.98327e-10
SHISA3	1.38339	1.38606	47.1411	6.62266e-12	3.08019e-10
LY6E-DT	3.34742	-0.628881	46.9977	7.12527e-12	3.30851e-10
TOX2	-0.707479	3.37284	46.9092	7.45406e-12	3.45551e-10
PRDM1	0.459816	5.9945	46.8548	7.66392e-12	3.54698e-10
ADGRG1	0.447752	6.73004	46.8062	7.85619e-12	3.63002e-10
CYP19A1	0.373931	8.39991	46.7906	7.91899e-12	3.65307e-10
PPP1R3A	0.478529	6.1023	46.7623	8.03418e-12	3.70017e-10
HAVCR2	0.378615	7.98095	46.7296	8.16959e-12	3.75642e-10
LOC105371763	0.656181	4.6994	46.7147	8.23164e-12	3.7788e-10
ETV5	-0.466938	5.11642	46.6108	8.67979e-12	3.97807e-10
TNFAIP6	2.34036	1.85422	47.2905	9.55943e-12	4.37414e-10
AKIRIN2	0.398853	7.19017	46.2657	1.03511e-11	4.72871e-10
CTTN	0.432033	6.4379	46.1691	1.08741e-11	4.95966e-10
STX3	0.435589	6.22269	46.1607	1.09207e-11	4.97286e-10
CA2	-0.399851	6.58244	46.0588	1.15038e-11	5.22999e-10
RNA45SN3	0.591657	3.95233	45.8882	1.25504e-11	5.69663e-10
SESN3	-0.636731	3.74513	45.8599	1.27329e-11	5.77019e-10
RXFP1	0.506843	5.54828	45.7419	1.35235e-11	6.11869e-10
DLG3	-0.603935	3.57819	45.6208	1.43856e-11	6.49833e-10
SH3KBP1	-0.378615	7.5647	45.4492	1.57023e-11	7.08182e-10
SYNJ2	0.388592	7.44927	45.4115	1.60075e-11	7.20796e-10
MARCHF9	0.820655	3.26958	45.2974	1.69678e-11	7.62824e-10
GPR180	0.562385	4.46238	45.2158	1.76892e-11	7.93991e-10
RNA45SN2	0.595294	3.90213	45.1475	1.8317e-11	8.20868e-10
PTGES	2.28724	1.00883	45.0834	1.89264e-11	8.46835e-10
REL	0.495251	4.97647	45.0598	1.91558e-11	8.55745e-10
PTP4A1	0.371003	7.95142	44.8564	2.1252e-11	9.47891e-10
PRAG1	-0.423634	5.83132	44.8024	2.18455e-11	9.71731e-10
ACOT2	0.462353	5.46191	44.8016	2.18552e-11	9.71731e-10
NPIPB5	0.423516	5.81734	44.757	2.23586e-11	9.92555e-10
ANKH	-0.405418	6.01969	44.7353	2.2607e-11	1.00201e-09
UHRF1BP1	0.40303	6.683	44.6592	2.3503e-11	1.04009e-09
ADORA2B	0.79709	3.64028	44.6387	2.37504e-11	1.0494e-09
SNHG32	0.373083	7.70632	44.5363	2.50251e-11	1.10399e-09
LOC284454	0.753071	3.16018	44.493	2.55858e-11	1.12697e-09
FEM1C	0.466046	5.58965	44.424	2.65028e-11	1.16554e-09
ADRA2C	0.838885	2.98781	44.2743	2.8608e-11	1.25618e-09
CYLD	0.427299	6.10877	44.1547	3.04102e-11	1.33324e-09
S100A8	-1.39838	4.04754	44.0356	3.23187e-11	1.41472e-09
NFE2L3	0.7685	3.24592	43.9855	3.31562e-11	1.44914e-09
LRRC32	1.64531	1.25229	43.5988	4.03963e-11	1.76285e-09
TNFRSF11A	1.00598	2.0673	43.5767	4.08559e-11	1.78016e-09
CASP10	0.547051	4.44527	43.5619	4.1166e-11	1.79091e-09
RAB9A	0.556526	4.5224	43.5121	4.22268e-11	1.83424e-09
PLIN2	0.367196	7.9156	43.5027	4.24294e-11	1.84021e-09
IL6R-AS1	1.38191	3.67787	43.4896	4.27149e-11	1.84976e-09
EGR2	0.387549	7.41701	43.4863	4.27882e-11	1.8501e-09
ARHGAP18	-0.364921	7.96307	43.4763	4.30055e-11	1.85665e-09
PDXK	0.380057	7.30778	43.3457	4.5975e-11	1.98183e-09
GCA	0.719273	3.23289	43.3406	4.60945e-11	1.98396e-09
PLXNC1	0.431583	6.63169	43.3105	4.68094e-11	2.01166e-09
IL16	-0.675384	3.28973	43.1832	4.99546e-11	2.14358e-09
RNF125	-0.68922	3.29811	43.0802	5.26553e-11	2.25604e-09
LINC00685	1.26019	1.1891	42.9128	5.73555e-11	2.4537e-09
NBPF14	0.411108	5.97926	42.8912	5.79926e-11	2.47721e-09
MMP8	0.5024	4.43773	42.772	6.1637e-11	2.62892e-09
ELL2	0.388775	7.22274	42.7544	6.21919e-11	2.64859e-09
LONRF2	-0.547554	4.05957	42.686	6.44063e-11	2.73877e-09
RAI14	0.378565	7.9622	42.6403	6.59267e-11	2.79921e-09
C21orf91	0.487915	5.05392	42.5791	6.80247e-11	2.88396e-09
TSPAN10	0.864802	2.40095	42.512	7.03972e-11	2.98008e-09
IL1R1	0.474637	4.7443	42.3118	7.79821e-11	3.29623e-09
SLC38A5	0.575798	3.97445	42.2911	7.88142e-11	3.32316e-09
NFATC2	-0.618028	3.34987	42.2901	7.88544e-11	3.32316e-09
ETS1	-0.360705	7.78672	42.285	7.9057e-11	3.32675e-09
LRATD2	0.939373	1.92402	42.2526	8.03805e-11	3.37741e-09
CBR1	0.497245	4.76475	42.1566	8.44218e-11	3.54196e-09
LY6G5B	0.486272	4.73791	42.1056	8.6653e-11	3.63018e-09
LAIR1	0.346955	9.21083	42.0649	8.84741e-11	3.70099e-09
EDEM3	-0.373257	7.17332	42.0602	8.86887e-11	3.70449e-09
MPRIP	-0.368545	7.08503	41.984	9.2211e-11	3.84593e-09
LMO4	0.371685	7.61849	41.9629	9.3213e-11	3.882e-09
C9orf129	-1.0261	2.07187	41.8846	9.70187e-11	4.03455e-09
CNDP2	0.365456	7.69455	41.8367	9.94245e-11	4.12852e-09
LNPEP	0.383273	6.64634	41.8096	1.0081e-10	4.17993e-09
DPF3	-0.485326	4.83742	41.6994	1.06659e-10	4.41595e-09
TMEM50A	0.384471	6.80255	41.6913	1.07098e-10	4.42765e-09
CCNL1	0.440701	5.38481	41.4632	1.2035e-10	4.96827e-09
MSR1	0.349197	8.53833	41.4129	1.2349e-10	5.09043e-09
TICAM1	0.483778	5.18593	41.1816	1.38997e-10	5.72132e-09
SENP6	-0.369747	7.13381	41.1513	1.41167e-10	5.80223e-09
PFDN6	-0.368165	7.4501	41.1421	1.4183e-10	5.821e-09
MCRIP2	0.502587	4.79379	41.0743	1.46835e-10	6.0177e-09
XYLT1	-0.37138	6.6286	41.0428	1.49222e-10	6.10667e-09
BAZ1A	0.366289	7.4656	41.0201	1.50968e-10	6.16917e-09
SEMA6B	1.11372	2.8497	40.9708	1.54818e-10	6.31352e-09
KLF10	0.392966	6.25622	40.9692	1.54947e-10	6.31352e-09
CFH	2.05616	3.74886	42.8076	1.55894e-10	6.34299e-09
SLCO4A1	0.447414	5.30076	40.799	1.69048e-10	6.86831e-09
ERAP2	0.660849	3.81811	40.7924	1.6962e-10	6.88166e-09
ANKRD10	0.393451	6.61339	40.7731	1.71301e-10	6.93992e-09
ATXN7	0.497199	4.8544	40.6943	1.78344e-10	7.21491e-09
PROCR	0.538567	4.96325	40.6646	1.81078e-10	7.31503e-09
MAP4K4	-0.344399	8.59197	40.6519	1.82256e-10	7.35213e-09
TFAP2C	1.02028	2.52619	40.5971	1.87439e-10	7.55042e-09
SCAMP1	0.430582	5.31482	40.5375	1.93241e-10	7.77308e-09
ZNF281	0.363797	7.50259	40.4176	2.05478e-10	8.25354e-09
VSIR	-0.393612	6.74723	40.3484	2.12885e-10	8.53896e-09
GRIP2	1.42225	1.96326	40.2833	2.20089e-10	8.81542e-09
RXRA	-0.355927	7.47469	40.2373	2.25338e-10	9.01288e-09
GOLGA8R	-0.484683	4.32841	40.2216	2.27156e-10	9.07277e-09
SEPTIN4	1.08977	1.88978	40.2161	2.27799e-10	9.0856e-09
NR4A1	2.08398	0.40697	40.1269	2.38437e-10	9.4965e-09
GRASP	1.04104	3.05787	40.0897	2.43022e-10	9.66549e-09
ABCC6	0.391148	6.37008	40.0777	2.4452e-10	9.71142e-09
ADCY9	-0.407913	5.58167	40.0709	2.45368e-10	9.73145e-09
UNC5B	-0.391171	5.9046	39.8859	2.69732e-10	1.06828e-08
TGFB1	0.340862	8.94154	39.8803	2.70505e-10	1.06984e-08
CDCP1	-0.405796	6.15981	39.8555	2.73971e-10	1.08203e-08
LINC01094	-0.523979	4.30262	39.8403	2.76109e-10	1.08896e-08
PNKD	0.377205	6.9162	39.7395	2.90733e-10	1.14503e-08
DNPEP	0.422017	5.74649	39.688	2.98499e-10	1.17399e-08
TGFBI	-0.32257	10.2679	39.5054	3.27752e-10	1.28725e-08
PKP4	-0.391673	5.9656	39.4945	3.2958e-10	1.29263e-08
PTPN14	-0.401888	5.50242	39.4481	3.37501e-10	1.32186e-08
INSIG1	0.359229	7.60343	39.4076	3.44578e-10	1.34771e-08
FLVCR2	0.50734	5.03273	39.2768	3.68442e-10	1.43906e-08
MYO6	-0.344675	8.22757	39.2461	3.74281e-10	1.45985e-08
ACOT9	0.423108	5.64864	39.1461	3.9394e-10	1.53441e-08
NFKBIZ	0.878232	2.45371	39.1407	3.95044e-10	1.5366e-08
CDK20	0.594846	4.04175	38.9696	4.31219e-10	1.675e-08
NUDT3	-0.38856	5.95625	38.9211	4.42057e-10	1.71474e-08
ZC3H12C	0.366301	6.75346	38.8403	4.60742e-10	1.78478e-08
PI4K2A	0.363514	7.39511	38.8326	4.62563e-10	1.78938e-08
ARAP1	0.351126	7.63398	38.6746	5.01562e-10	1.93759e-08
XK	-0.51477	4.13753	38.653	5.07125e-10	1.95641e-08
FLCN	0.487845	4.7328	38.6422	5.09939e-10	1.96459e-08
SIGLEC15	0.535595	4.16751	38.5862	5.2478e-10	2.01901e-08
ATP6V0C	0.354978	7.58586	38.5789	5.26742e-10	2.02381e-08
PARP4	0.352075	7.3608	38.443	5.64737e-10	2.16684e-08
NBPF10	0.433692	5.1759	38.3844	5.81949e-10	2.22986e-08
ZNF267	0.390931	6.30302	38.3743	5.84972e-10	2.23841e-08
HCG4	1.21381	1.18842	38.3181	6.02051e-10	2.30065e-08
DYNC2H1	-0.643257	3.0373	38.3042	6.06356e-10	2.31397e-08
CYSLTR1	-0.391013	5.44761	38.2229	6.32138e-10	2.40911e-08
SPIRE1	0.399136	6.11997	38.2195	6.33235e-10	2.41004e-08
N4BP3	1.20189	1.72669	38.1928	6.41971e-10	2.44001e-08
UHRF1	-0.393731	5.40474	38.1847	6.44638e-10	2.44685e-08
RGS2	0.3514	7.17149	38.1502	6.56136e-10	2.48656e-08
OTOF	1.93536	2.20922	39.0378	6.56856e-10	2.48656e-08
NBPF26	0.388551	5.92765	38.1154	6.67935e-10	2.52511e-08
BTC	1.69952	0.503254	38.0711	6.83281e-10	2.57968e-08
SLC6A7	1.83741	0.837187	37.9546	7.2533e-10	2.73478e-08
SLC7A8	-0.342764	7.55853	37.8315	7.72533e-10	2.90888e-08
ADARB1	-0.38278	5.64041	37.7988	7.85598e-10	2.95414e-08
ATP8B1	-0.451363	4.83912	37.7578	8.02306e-10	3.01296e-08
NIBAN1	-0.37053	6.58596	37.7233	8.16583e-10	3.06251e-08
EEF1AKMT3	0.720052	3.33476	37.3699	9.78776e-10	3.66594e-08
TBX3	0.750663	3.06434	37.2553	1.03802e-09	3.88269e-08
AGAP11	0.895407	2.07523	37.2238	1.05489e-09	3.94059e-08
TJP1	1.16086	1.99945	37.1425	1.09978e-09	4.10284e-08
ANKRD44	-0.380754	5.85603	37.0484	1.15417e-09	4.30006e-08
TNFRSF10D	-0.417921	5.28745	36.967	1.2034e-09	4.47759e-08
TMEM219	0.36111	6.70591	36.8864	1.25418e-09	4.66041e-08
LOC100310756	0.511755	4.38525	36.8491	1.2784e-09	4.74418e-08
MSANTD3	0.485991	4.76191	36.6731	1.39915e-09	5.18548e-08
LRRC4	-0.6489	3.25339	36.5829	1.46539e-09	5.42385e-08
RUFY4	2.07702	0.426585	36.5711	1.47428e-09	5.44962e-08
AP5Z1	0.442693	4.94044	36.5305	1.50529e-09	5.55701e-08
AKNA	-0.375154	5.76274	36.3891	1.61858e-09	5.96743e-08
GAL	0.42225	6.18708	36.371	1.63363e-09	6.01507e-08
IFI30	0.315027	9.92539	36.3104	1.68518e-09	6.19682e-08
WASL	0.532813	4.56715	36.2985	1.69556e-09	6.22689e-08
TRAM2	-0.3634	6.32003	36.2831	1.70895e-09	6.26793e-08
CFP	-0.565921	3.41729	36.246	1.74187e-09	6.38038e-08
HOMER1	0.393707	6.02177	36.1365	1.84246e-09	6.74011e-08
KANK4	2.31402	1.83382	37.5843	1.84531e-09	6.74182e-08
IRF2	0.383596	5.96264	36.0839	1.89289e-09	6.90671e-08
LINC01000	0.436512	4.89106	35.9628	2.01421e-09	7.33992e-08
IL32	1.72335	2.8549	36.718	2.01733e-09	7.34184e-08
TNK2-AS1	1.88896	0.296161	35.9058	2.07401e-09	7.53842e-08
RNF141	-0.499731	4.19588	35.854	2.12994e-09	7.73178e-08
SUCNR1	-0.408322	5.06334	35.8101	2.1784e-09	7.89753e-08
KLHL21	0.447526	5.16732	35.8047	2.18449e-09	7.90948e-08
SLC8B1	0.454983	5.02012	35.6944	2.31174e-09	8.35952e-08
ASMTL-AS1	0.562705	3.73207	35.6104	2.41348e-09	8.71628e-08
KCNA2	1.2139	2.06767	35.5836	2.44698e-09	8.82599e-08
TFRC	0.326891	8.59646	35.5431	2.49832e-09	8.99967e-08
ZMIZ2	0.382071	5.9627	35.5007	2.55339e-09	9.18634e-08
SPART	0.377626	5.87847	35.2701	2.87422e-09	1.03275e-07
ANXA2R	0.640613	4.25469	35.2524	2.90045e-09	1.04085e-07
SLC12A8	0.376952	6.5771	35.1512	3.0551e-09	1.09496e-07
MOB3C	0.554456	3.97021	35.0163	3.27429e-09	1.17203e-07
DUSP5	0.345334	7.33132	34.8863	3.50037e-09	1.25137e-07
JADE2	0.429918	4.9046	34.8751	3.52049e-09	1.25697e-07
RNF19A	0.337529	7.2152	34.6675	3.91663e-09	1.39665e-07
MRC2	-0.318824	8.28757	34.642	3.96829e-09	1.41329e-07
WBP2	0.345668	7.06343	34.6071	4.03991e-09	1.43699e-07
BAG3	0.373028	6.44386	34.5661	4.12604e-09	1.46578e-07
ZHX3	-0.439524	4.81642	34.5544	4.1509e-09	1.47276e-07
FGR	0.529007	4.69634	34.5426	4.17613e-09	1.47986e-07
LOC102724814	0.558568	3.74795	34.2272	4.91052e-09	1.73792e-07
TXNRD1	0.32192	8.41476	34.1929	4.99789e-09	1.76663e-07
BTG1	0.318789	8.49499	34.1331	5.15387e-09	1.81949e-07
RASGRF1	0.3808	6.00501	34.1171	5.1963e-09	1.83218e-07
ZMYND15	1.29406	1.62914	34.0382	5.41148e-09	1.90568e-07
ASB2	1.26865	0.728739	34.008	5.49595e-09	1.93302e-07
LCP2	0.343797	6.92479	33.9949	5.53322e-09	1.94371e-07
MOAP1	0.365497	6.11399	33.9913	5.54345e-09	1.94488e-07
JCAD	-0.560353	3.16664	33.9637	5.62254e-09	1.97019e-07
C6orf62	0.338573	7.1019	33.9299	5.72122e-09	2.00228e-07
P2RX4	0.361067	6.10811	33.9007	5.8075e-09	2.02997e-07
ANLN	-0.357752	5.76517	33.8667	5.90987e-09	2.0632e-07
FUT4	0.376123	5.698	33.8285	6.0272e-09	2.10157e-07
MMD	-0.484879	4.12216	33.8187	6.05747e-09	2.10952e-07
ELP1	-0.393542	5.01547	33.7126	6.39717e-09	2.22508e-07
B3GNT2	0.370824	5.96042	33.6736	6.52645e-09	2.26726e-07
TNFAIP8L1	0.445539	5.00795	33.636	6.65396e-09	2.30872e-07
MVP	0.330593	7.8118	33.6053	6.75995e-09	2.34262e-07
VCAN	-0.606531	2.94571	33.5839	6.83452e-09	2.36556e-07
FCGR1A	-0.377742	6.16162	33.5336	7.01362e-09	2.42458e-07
SETDB2	0.564591	3.84765	33.5149	7.08143e-09	2.44504e-07
UBTD2	0.39451	5.50964	33.3664	7.64313e-09	2.63576e-07
CBX5	-0.32439	7.4081	33.3445	7.72979e-09	2.6624e-07
DPY19L1	-0.397326	5.25502	33.3308	7.78408e-09	2.67784e-07
LILRA1	-0.568257	3.49913	33.2431	8.14343e-09	2.79805e-07
KCNQ4	0.723993	2.58625	33.1626	8.48729e-09	2.91266e-07
YEATS2	0.360113	6.01186	33.1378	8.59623e-09	2.94647e-07
LOC100996740	0.989687	1.66243	33.0586	8.95367e-09	3.06528e-07
APAF1	-0.407746	4.9043	32.9685	9.37834e-09	3.20678e-07
MET	1.61238	0.919983	32.9339	9.54664e-09	3.26039e-07
ADAMDEC1	0.322822	7.60274	32.9137	9.64656e-09	3.29054e-07
AGAP1	-0.380748	5.48055	32.8852	9.78893e-09	3.33508e-07
PGGHG	0.573806	3.33671	32.8596	9.91839e-09	3.37512e-07
BAG1	0.373047	5.67769	32.8286	1.00781e-08	3.42533e-07
GTF2B	0.408678	5.46086	32.8076	1.01873e-08	3.45829e-07
BTG3	0.403609	5.19928	32.6874	1.08372e-08	3.67453e-07
BAMBI	0.718336	3.38044	32.6494	1.10513e-08	3.74261e-07
SLC22A15	0.470072	4.506	32.6402	1.11033e-08	3.75575e-07
MCEMP1	-0.527167	4.36669	32.6155	1.12458e-08	3.79938e-07
RFTN1	0.341546	7.29386	32.5728	1.14953e-08	3.87905e-07
FTL	0.259671	12.8196	32.5254	1.17788e-08	3.96999e-07
PCDHAC2	0.681356	2.66235	32.4622	1.21683e-08	4.09637e-07
CCNE2	-0.377651	5.1845	32.4394	1.2312e-08	4.13981e-07
KIF14	-0.397026	4.795	32.3716	1.27491e-08	4.28169e-07
AIDA	0.322332	7.47179	32.331	1.30182e-08	4.36689e-07
GLS	-0.321608	7.52407	32.3036	1.32031e-08	4.42366e-07
USF1	0.366197	5.83826	32.2366	1.36664e-08	4.57348e-07
INKA2	-0.586898	3.21775	32.1771	1.40913e-08	4.7101e-07
MFN1	0.387932	5.59435	32.1623	1.41989e-08	4.74047e-07
NCKAP1L	-0.311373	8.12563	32.1487	1.42984e-08	4.76804e-07
MED25	0.381815	5.52613	32.129	1.4444e-08	4.81093e-07
NPAS2	-0.501511	3.61834	32.1177	1.45288e-08	4.83346e-07
TMEM63A	0.331708	6.88424	32.0339	1.51688e-08	5.04047e-07
PSMB10	0.344418	6.94876	32.024	1.52464e-08	5.06029e-07
MACF1	-0.31903	7.32586	32.0075	1.53761e-08	5.09737e-07
MRPS30	0.427965	4.94379	31.9441	1.58866e-08	5.26044e-07
PRKCE	0.871912	1.82603	31.9134	1.61392e-08	5.33784e-07
NINJ1	0.351099	6.21149	31.9085	1.61799e-08	5.34504e-07
CD40	0.442653	5.33128	31.7997	1.71125e-08	5.64653e-07
CXCL9	1.95045	6.19403	36.0437	1.72238e-08	5.67661e-07
KLHL24	0.371005	5.61884	31.759	1.74749e-08	5.75267e-07
SPATA5L1	0.497284	4.32344	31.6881	1.81242e-08	5.9595e-07
DNAJA1	0.303501	8.98295	31.666	1.8332e-08	6.02082e-07
SDCBP	0.30173	9.15144	31.6131	1.88379e-08	6.1798e-07
SLC49A3	0.563245	4.11674	31.5351	1.96092e-08	6.42535e-07
WIPI1	0.450693	5.04951	31.5281	1.96802e-08	6.44117e-07
KIAA1143	-0.389636	5.02432	31.4962	2.00065e-08	6.54038e-07
PDGFRL	1.51009	-0.104498	31.4808	2.01661e-08	6.58494e-07
SLC43A2	0.353922	6.0429	31.3669	2.13837e-08	6.97449e-07
STRIP2	0.558241	3.85807	31.3041	2.20864e-08	7.19538e-07
ABI2	-0.350915	5.90551	31.2858	2.22954e-08	7.2551e-07
AGPAT4	0.360947	5.73619	31.2709	2.24678e-08	7.30282e-07
JAK2	0.365223	6.34048	31.2589	2.26067e-08	7.33952e-07
ATP2A3	-0.350105	6.0836	31.2529	2.26774e-08	7.35403e-07
DEPDC1B	-0.442365	4.15513	31.2335	2.29041e-08	7.41903e-07
SV2B	-0.59004	2.90066	31.13	2.41585e-08	7.81642e-07
GLA	0.328388	7.28895	31.1238	2.42359e-08	7.83248e-07
AIF1	-0.312334	7.60865	31.1181	2.43068e-08	7.84644e-07
SLFN12	0.719693	2.28744	31.1114	2.43914e-08	7.86478e-07
IRS2	0.34994	6.39655	30.9512	2.64891e-08	8.53141e-07
THTPA	0.456376	4.54239	30.9235	2.68707e-08	8.64449e-07
MEF2C	-0.308677	7.63399	30.9178	2.69491e-08	8.65986e-07
CAP1	-0.25199	12.9019	30.9146	2.69943e-08	8.66451e-07
KIFC2	0.37948	5.41572	30.8653	2.7688e-08	8.87712e-07
PTPN22	-0.660333	2.78254	30.8358	2.8113e-08	9.00317e-07
GRAMD1B	0.373503	5.55418	30.8104	2.84822e-08	9.1111e-07
OSBPL1A	0.442431	4.51513	30.7932	2.87357e-08	9.1818e-07
JAG2	-0.395986	4.79841	30.7512	2.93651e-08	9.37229e-07
HPS3	0.366212	5.85396	30.7293	2.96988e-08	9.46814e-07
MGAT5	-0.331431	6.45263	30.7232	2.97918e-08	9.48708e-07
S100A11	0.296078	9.38346	30.6921	3.02734e-08	9.62959e-07
SBNO2	0.311509	8.02664	30.6695	3.0628e-08	9.73146e-07
SMC2	-0.34189	5.76381	30.6454	3.10102e-08	9.84183e-07
CCNA1	0.801811	2.31765	30.6038	3.16822e-08	1.00438e-06
CAT	-0.354848	5.73421	30.5858	3.19775e-08	1.01261e-06
SSB	0.331855	6.56164	30.5274	3.29542e-08	1.04237e-06
ANO5	0.5852	3.37166	30.5233	3.30241e-08	1.04341e-06
DRAP1	0.343142	6.24662	30.4827	3.37219e-08	1.06427e-06
PIK3R5	0.344314	6.42627	30.4084	3.50392e-08	1.10461e-06
PAQR4	-0.38491	5.00134	30.3034	3.69882e-08	1.16476e-06
TNFRSF9	0.889929	1.78519	30.2129	3.87536e-08	1.21899e-06
STARD4	0.334305	6.69772	30.1765	3.94878e-08	1.24071e-06
MED15	0.328172	6.75253	30.1437	4.01623e-08	1.2605e-06
HMGN2P46	1.06808	1.70815	30.1237	4.05784e-08	1.27214e-06
ASAP1	0.298893	8.57959	29.8963	4.56272e-08	1.42884e-06
SH3PXD2A	-0.327889	6.37949	29.8916	4.57377e-08	1.43072e-06
BUB1B	-0.342651	5.54687	29.8796	4.60208e-08	1.43799e-06
TTC3	-0.31981	6.86268	29.7993	4.79657e-08	1.4971e-06
SLC7A5	-0.330522	6.22189	29.6642	5.14294e-08	1.60344e-06
MCTP1	0.386646	5.57439	29.6566	5.16313e-08	1.60796e-06
PHLDA1	0.290131	9.4167	29.6482	5.18557e-08	1.61317e-06
MIA2	-0.35583	5.62932	29.6342	5.22298e-08	1.62303e-06
SKP2	-0.403798	4.56976	29.4954	5.61073e-08	1.74161e-06
C1GALT1	0.447708	4.28414	29.4128	5.85506e-08	1.81545e-06
GPD2	0.346743	6.17789	29.3719	5.97975e-08	1.85208e-06
RESF1	0.308666	7.66208	29.3546	6.03355e-08	1.8667e-06
SOGA3	0.811758	2.26452	29.3389	6.08262e-08	1.87832e-06
PLEKHO1	0.307675	7.69455	29.3372	6.08789e-08	1.87832e-06
CRYBB1	-0.467935	3.88675	29.3362	6.09103e-08	1.87832e-06
COTL1	-0.297451	8.02004	29.2894	6.23992e-08	1.92027e-06
ARHGAP5	0.727597	3.8919	29.2892	6.24064e-08	1.92027e-06
NPIPB11	0.551525	3.36182	29.219	6.47059e-08	1.98886e-06
DDO	0.648087	3.13974	29.2085	6.50586e-08	1.99753e-06
DUSP7	-0.303119	7.63252	29.2007	6.53203e-08	2.00339e-06
AMOTL2	0.64789	3.35894	29.1463	6.71819e-08	2.05695e-06
SLC26A6	0.330742	6.35763	29.1454	6.7212e-08	2.05695e-06
RILP	0.640717	3.6064	29.0656	7.00398e-08	2.14117e-06
SNN	0.514161	4.25929	29.0632	7.01258e-08	2.14149e-06
CDK17	0.366174	5.49385	29.0423	7.08854e-08	2.16235e-06
C3orf80	-0.501879	3.48831	29.0309	7.13027e-08	2.17274e-06
BMP8A	-0.521155	3.16547	28.928	7.51947e-08	2.28887e-06
VEGFB	0.427161	4.55705	28.8961	7.64432e-08	2.32437e-06
PHACTR3	-0.594621	2.49873	28.8861	7.68392e-08	2.3339e-06
PCDHGA11	-0.423499	4.43559	28.8387	7.87401e-08	2.38907e-06
FNBP1	-0.393145	4.81823	28.7933	8.061e-08	2.44318e-06
GSTO1	0.305073	7.66196	28.7831	8.10329e-08	2.45337e-06
TRMT5	0.411512	4.72033	28.7607	8.19745e-08	2.47922e-06
MIR22HG	0.489143	4.23214	28.6361	8.74214e-08	2.64114e-06
IRAK3	-0.432575	4.34521	28.6332	8.75563e-08	2.64239e-06
PRR11	-0.329941	5.66212	28.6276	8.7809e-08	2.64719e-06
NCAPD3	-0.324081	6.08807	28.6057	8.88069e-08	2.67442e-06
ITPR1	0.334702	6.00049	28.5972	8.91977e-08	2.68333e-06
NIN	-0.318537	6.47815	28.5755	9.02004e-08	2.70937e-06
CARS2	0.346342	5.85922	28.5744	9.02549e-08	2.70937e-06
MMP13	1.70586	-0.450124	28.5202	9.2814e-08	2.78324e-06
CNTRL	-0.372894	4.88031	28.4419	9.66438e-08	2.89502e-06
HAPLN3	1.28236	4.19583	29.0099	9.74499e-08	2.91607e-06
CDK5RAP3	0.314598	6.85356	28.3692	1.00341e-07	2.99942e-06
LAMC1	-0.291198	8.22127	28.3275	1.02527e-07	3.06153e-06
OSGIN1	0.623047	3.26422	28.2666	1.05805e-07	3.15606e-06
SPECC1	-0.478467	4.05275	28.2561	1.06377e-07	3.1698e-06
CBARP	0.889134	1.88463	28.2469	1.06887e-07	3.18024e-06
FAM20C	0.287979	8.82377	28.2457	1.06953e-07	3.18024e-06
DOCK2	-0.296304	7.62172	28.2206	1.0835e-07	3.21839e-06
LYPLAL1-AS1	0.741599	2.1316	28.2083	1.09038e-07	3.23544e-06
LRRC3B	1.27819	0.876155	28.1674	1.11365e-07	3.29914e-06
SMIM25	2.21644	0.282689	28.1665	1.11418e-07	3.29914e-06
SLC30A3	0.394475	5.36132	28.1556	1.12046e-07	3.31425e-06
MYH9	-0.273583	10.0687	28.0862	1.16138e-07	3.43171e-06
C4orf48	0.713763	2.53981	28.0723	1.16974e-07	3.4528e-06
ATP13A1	0.312556	6.90265	28.0598	1.17735e-07	3.47166e-06
DLGAP5	-0.366937	4.80094	28.0509	1.18274e-07	3.4839e-06
RENBP	0.373991	5.09206	28.0245	1.19898e-07	3.52616e-06
BHLHE22	0.296635	7.7798	28.0236	1.19958e-07	3.52616e-06
TRIM31	6.2674	-0.262144	27.9696	1.2335e-07	3.62211e-06
TBC1D3L	0.641949	2.60874	27.9633	1.23755e-07	3.63022e-06
BLOC1S2	0.350282	5.65319	27.9579	1.24099e-07	3.63655e-06
CXCL2	1.60985	1.03688	27.9375	1.25414e-07	3.67127e-06
PPM1H	0.399648	4.8021	27.9284	1.26004e-07	3.68473e-06
TRPM8	0.331776	5.7807	27.9138	1.2696e-07	3.70887e-06
PTPRE	0.307811	7.64253	27.8749	1.29534e-07	3.78014e-06
NUCKS1	-0.283541	8.69374	27.7629	1.37256e-07	4.00136e-06
EVC	0.335474	6.34436	27.7509	1.38109e-07	4.02209e-06
RTL5	0.656867	3.06754	27.7478	1.38331e-07	4.02442e-06
CAMK2G	-0.475563	3.75791	27.7092	1.41116e-07	4.10121e-06
DTX4	1.05526	1.3393	27.6945	1.42195e-07	4.12833e-06
NTSR1	-0.453558	4.20155	27.6906	1.42482e-07	4.13241e-06
LINC00926	0.762752	2.22659	27.6561	1.45045e-07	4.20244e-06
PLD4	-0.297524	7.25205	27.6451	1.45876e-07	4.22219e-06
TANC1	-0.391362	4.68542	27.6326	1.46818e-07	4.24512e-06
CD93	-0.302848	6.75637	27.6254	1.47365e-07	4.25567e-06
JPT1	-0.35444	5.30501	27.6238	1.47484e-07	4.25567e-06
RGS14	-0.337642	5.97408	27.6046	1.48955e-07	4.29373e-06
TMEM150B	0.715955	2.55446	27.5863	1.50377e-07	4.33031e-06
TENT4B	0.464323	4.40829	27.5494	1.53273e-07	4.40921e-06
DOCK10	-0.279978	9.23731	27.5305	1.54773e-07	4.44783e-06
RETREG1	1.07822	1.79376	27.5224	1.55421e-07	4.46193e-06
EFNB2	0.524	5.41897	27.4832	1.58608e-07	4.54881e-06
ENO2	0.530558	3.87507	27.4261	1.63357e-07	4.68026e-06
LRIG1	-0.483472	4.14155	27.4159	1.64226e-07	4.7004e-06
RAB7B	0.284698	8.5779	27.4033	1.65295e-07	4.72621e-06
ZNF620	0.74435	2.27764	27.353	1.69649e-07	4.8458e-06
LINC01556	6.76983	-2.04792	27.3082	1.73626e-07	4.95439e-06
APBB1IP	-0.314223	6.20865	27.3016	1.74225e-07	4.96646e-06
HINT3	0.332939	6.08691	27.2788	1.76291e-07	5.02031e-06
CXCL3	1.0685	2.55937	27.2545	1.7852e-07	5.07866e-06
NRP2	0.331127	6.24559	27.2446	1.79433e-07	5.0995e-06
BIRC5	-0.323972	5.61316	27.2335	1.80463e-07	5.12364e-06
IL3RA	0.425251	4.85631	27.1759	1.85925e-07	5.27341e-06
PTGIR	1.03449	1.70981	27.1434	1.89071e-07	5.35726e-06
PCDH20	0.447462	4.31666	27.1382	1.89588e-07	5.36654e-06
TRIB3	-0.402718	4.68601	27.1331	1.90083e-07	5.37517e-06
RASSF2	-0.35705	5.19162	27.1237	1.91008e-07	5.39593e-06
DDIT3	0.579184	3.8689	27.0752	1.95858e-07	5.52742e-06
CILK1	-0.522164	3.45215	27.059	1.97507e-07	5.5684e-06
KANK2	-0.312851	6.36882	27.0565	1.97769e-07	5.57024e-06
SPARCL1	-0.442978	4.02814	27.0362	1.99851e-07	5.62328e-06
SH3BP2	0.296317	7.52458	27.0273	2.00775e-07	5.64364e-06
NEO1	-0.357384	5.26815	27.0235	2.01167e-07	5.64905e-06
CENPF	-0.297508	6.73698	27.0064	2.02955e-07	5.69362e-06
CYTH3	-0.374796	4.88583	26.9516	2.08791e-07	5.85152e-06
MAN1A1	-0.292037	7.75479	26.9451	2.09495e-07	5.86546e-06
SDC4	0.355736	5.59458	26.8832	2.16312e-07	6.05031e-06
IRF1-AS1	1.36739	0.704481	26.8233	2.23122e-07	6.23463e-06
CD38	1.06797	2.4349	26.8099	2.24681e-07	6.27199e-06
BCL6	0.310847	7.00609	26.7974	2.26132e-07	6.30628e-06
CD74	0.301256	9.09358	26.7881	2.27228e-07	6.33059e-06
EPOP	0.447492	5.02792	26.7152	2.35953e-07	6.56722e-06
PPP1R37	0.386356	5.02342	26.6994	2.37893e-07	6.61469e-06
PRKDC	-0.282195	8.12628	26.6628	2.42442e-07	6.73454e-06
CXCL12	1.20424	1.43311	26.6444	2.44761e-07	6.79229e-06
PRKACB	-0.450566	4.06323	26.6281	2.46842e-07	6.84332e-06
IL4R	-0.301063	6.9831	26.6227	2.47524e-07	6.85553e-06
USP2	0.343537	5.78301	26.6093	2.49254e-07	6.89667e-06
MID1IP1	0.288836	7.82425	26.5999	2.50461e-07	6.92331e-06
ITPKB	0.286808	7.90262	26.5004	2.63709e-07	7.27503e-06
LOC729603	0.719992	2.73381	26.4986	2.63946e-07	7.27503e-06
DHFR	-0.311781	5.93983	26.4985	2.63957e-07	7.27503e-06
TLE3	0.318573	6.31666	26.4789	2.66653e-07	7.34218e-06
IDH2	-0.292761	7.15266	26.4346	2.72839e-07	7.50518e-06
MYB	-0.55451	2.63137	26.4303	2.73443e-07	7.51188e-06
BAK1	0.294277	7.59976	26.4291	2.73613e-07	7.51188e-06
CGAS	0.404485	4.68612	26.4272	2.73893e-07	7.51227e-06
MAML3	-0.404808	4.39923	26.3934	2.7872e-07	7.63726e-06
GGTLC2	0.668523	2.32264	26.335	2.87283e-07	7.86426e-06
MYBL2	-0.304295	6.2106	26.3259	2.88628e-07	7.89344e-06
SOGA1	-0.311802	6.22475	26.3169	2.89977e-07	7.92267e-06
WSB1	0.303065	6.83853	26.298	2.92833e-07	7.99297e-06
CASP7	0.344204	5.82573	26.2902	2.94021e-07	8.01766e-06
ADAM19	-0.620552	2.65509	26.2638	2.9806e-07	8.11999e-06
ZBP1	4.08749	-1.99155	26.2584	2.98893e-07	8.13485e-06
IFT74	0.438016	4.21695	26.2516	2.99946e-07	8.15564e-06
PXK	-0.418019	4.49566	26.235	3.02539e-07	8.21825e-06
PSRC1	-0.380742	4.53297	26.0812	3.27614e-07	8.88896e-06
PKD1P6-NPIPP1	0.312435	6.10179	26.0798	3.27859e-07	8.88896e-06
SLC12A6	-0.304196	6.73192	26.074	3.2884e-07	8.90702e-06
PSMA3	0.311566	6.62145	26.0712	3.29321e-07	8.91151e-06
ZMAT3	-0.390953	4.73493	26.0437	3.34052e-07	9.03091e-06
LCLAT1	-0.45765	3.73579	26.0347	3.35605e-07	9.06422e-06
PDLIM4	0.340424	6.08767	25.9976	3.42114e-07	9.23121e-06
CCND1	0.271498	9.39414	25.9878	3.43856e-07	9.26935e-06
DLL4	1.92619	0.490329	25.9703	3.46984e-07	9.34477e-06
LINC00847	0.444733	4.2224	25.9569	3.49406e-07	9.40105e-06
TNFRSF12A	0.326005	6.15567	25.944	3.51741e-07	9.45487e-06
SRGAP2B	0.301463	6.79787	25.9268	3.549e-07	9.53073e-06
FRMD4A	0.29831	7.11551	25.9201	3.56136e-07	9.55485e-06
WASH2P	0.392535	4.67481	25.8626	3.66892e-07	9.8341e-06
SLA	-0.294377	7.53564	25.8259	3.73931e-07	1.00133e-05
S100A4	-0.272446	8.90663	25.8227	3.74563e-07	1.00207e-05
IL36RN	2.59539	2.0783	27.9108	3.75235e-07	1.00292e-05
PLCXD1	-0.314264	6.46681	25.7985	3.79278e-07	1.01277e-05
PRKD2	0.394626	4.66969	25.726	3.93794e-07	1.05054e-05
GRIN3A	1.57827	2.32434	26.3473	3.9952e-07	1.06481e-05
TWIST1	0.437068	4.02672	25.6418	4.11364e-07	1.09534e-05
SSH2	-0.411019	4.48504	25.632	4.13448e-07	1.09986e-05
HLA-DRA	0.446028	10.5464	27.8967	4.14707e-07	1.10217e-05
FMN1	0.716592	2.94686	25.6026	4.19809e-07	1.11468e-05
CDK18	0.460817	4.03046	25.5972	4.2097e-07	1.11672e-05
ARHGAP10	0.318379	6.18449	25.5954	4.21375e-07	1.11674e-05
CCN3	1.37593	0.816281	25.5912	4.22279e-07	1.11809e-05
SLAMF8	0.273434	9.06474	25.516	4.39058e-07	1.16143e-05
CCL22	0.372113	5.62802	25.4547	4.53236e-07	1.19781e-05
PSIP1	-0.319519	5.51885	25.4111	4.63596e-07	1.22349e-05
ATP6V1F	0.306702	6.74084	25.4102	4.63816e-07	1.22349e-05
VPS18	0.31837	6.12817	25.3989	4.66553e-07	1.22956e-05
SCG5	1.45478	0.403459	25.3822	4.70596e-07	1.23906e-05
USPL1	0.398847	4.59835	25.3697	4.73652e-07	1.24516e-05
HACD3	-0.297385	6.61171	25.3691	4.73793e-07	1.24516e-05
MMP14	-0.242153	11.6811	25.3095	4.88674e-07	1.28308e-05
FAT1	-0.278345	7.85172	25.293	4.92867e-07	1.29288e-05
CDON	-0.50716	3.44975	25.2168	5.12729e-07	1.34284e-05
PTPRC	-0.269806	8.89962	25.2139	5.13491e-07	1.34284e-05
TGFB2	0.50188	3.70835	25.212	5.14011e-07	1.34284e-05
ARC	0.857659	2.64378	25.2111	5.14233e-07	1.34284e-05
LTBP2	-0.292324	7.11279	25.2109	5.14287e-07	1.34284e-05
FOXO1	0.615136	3.08064	25.2087	5.14883e-07	1.34316e-05
GLRX	0.347706	5.5216	25.1563	5.29059e-07	1.37887e-05
ZNF622	0.340702	5.7035	25.1447	5.32248e-07	1.3859e-05
MIB1	-0.316137	5.86569	25.1203	5.3903e-07	1.40227e-05
LHFPL2	0.34163	6.15792	25.1032	5.43823e-07	1.41344e-05
MBD6	0.376641	4.77494	25.087	5.48417e-07	1.42407e-05
DUSP2	0.336235	6.31081	25.0807	5.50214e-07	1.42743e-05
MAD2L1	-0.323965	5.28213	25.0727	5.5249e-07	1.43202e-05
ARHGAP25	0.321443	5.90298	25.057	5.57013e-07	1.44242e-05
RPS6KA3	-0.277279	8.04052	25.0296	5.64977e-07	1.46039e-05
BMPR2	0.306932	6.3566	25.0296	5.64986e-07	1.46039e-05
CYP27A1	2.03686	0.600121	24.9393	5.92083e-07	1.52903e-05
CTDSP2	-0.291766	6.79982	24.8795	6.10718e-07	1.57487e-05
CTNS	0.436634	4.57871	24.8761	6.11809e-07	1.57487e-05
SLC38A7	0.318004	5.99721	24.8754	6.12034e-07	1.57487e-05
CCDC170	-0.72151	1.47234	24.8753	6.12059e-07	1.57487e-05
CFD	0.346053	5.2378	24.8581	6.17547e-07	1.58754e-05
MFSD2A	0.285691	7.89131	24.8539	6.18904e-07	1.58959e-05
PRKAR2B	-0.787079	1.85867	24.8457	6.21538e-07	1.5949e-05
TCF12	-0.276967	7.74161	24.8282	6.27197e-07	1.60797e-05
HSPA7	1.84723	-0.289176	24.7882	6.40365e-07	1.64024e-05
LOC389641	0.6633	2.72229	24.7146	6.65277e-07	1.70251e-05
SOCS3	0.694991	3.6491	24.7078	6.67613e-07	1.70694e-05
LOC728743	0.915289	1.96335	24.6926	6.72911e-07	1.71893e-05
ZNF707	0.357245	5.07825	24.6527	6.86999e-07	1.75333e-05
CLDN12	0.437235	4.90368	24.6449	6.89766e-07	1.75881e-05
DAGLA	0.320997	6.07678	24.6294	6.95351e-07	1.77145e-05
ANXA11	0.267586	8.95844	24.5496	7.24752e-07	1.84469e-05
ATP10A	0.343029	4.89532	24.4343	7.69406e-07	1.95659e-05
MROH1	0.312728	6.13725	24.3874	7.88402e-07	2.00309e-05
KIF20A	-0.359855	4.52978	24.3508	8.03508e-07	2.03964e-05
UBE2T	-0.382657	4.31045	24.2975	8.26023e-07	2.09491e-05
ARID5A	0.379616	4.98296	24.2168	8.61399e-07	2.18267e-05
AVPI1	0.57017	3.95619	24.2146	8.62389e-07	2.18323e-05
IGLON5	-0.773926	1.27938	24.2052	8.66573e-07	2.19186e-05
ADGRA3	-0.412437	4.0234	24.1947	8.71334e-07	2.20193e-05
PKD1P3-NPIPA1	0.276178	7.51803	24.1484	8.92544e-07	2.25351e-05
LGI2	-0.283385	6.77326	24.1367	8.97947e-07	2.26513e-05
FAM172A	-0.401778	4.40644	24.0107	9.58674e-07	2.41617e-05
HS3ST1	0.955941	0.775306	24.0032	9.62417e-07	2.42254e-05
CYSTM1	0.317056	5.75706	24.0022	9.62915e-07	2.42254e-05
CAB39L	0.36817	5.19286	23.9387	9.95225e-07	2.5016e-05
PCDH17	1.70464	0.725602	23.9073	1.01155e-06	2.54037e-05
INA	-0.391542	4.11495	23.8614	1.03599e-06	2.59945e-05
CDK5R1	-0.507124	3.18376	23.8484	1.04299e-06	2.61468e-05
GLUL	0.271784	8.4592	23.8253	1.0556e-06	2.64395e-05
PLAA	0.313973	5.88746	23.8125	1.06261e-06	2.65916e-05
ATG16L1	-0.297859	6.49411	23.7588	1.09271e-06	2.73092e-05
EBI3	0.718944	2.86339	23.7579	1.09322e-06	2.73092e-05
SERTAD1	0.360329	5.36912	23.7552	1.09472e-06	2.73227e-05
ASPM	-0.296045	5.80394	23.7467	1.09958e-06	2.74197e-05
NCF4	-0.282119	6.89696	23.7433	1.1015e-06	2.74433e-05
NBPF8	0.323645	5.4176	23.7146	1.1181e-06	2.78323e-05
MCM6	-0.290566	6.28353	23.6972	1.12823e-06	2.80599e-05
MEGF9	-0.496145	3.38272	23.6923	1.13107e-06	2.81058e-05
ASPH	-0.260545	9.03728	23.6811	1.13773e-06	2.82464e-05
LPAR3	0.867646	1.94022	23.6388	1.16297e-06	2.88387e-05
SLC38A6	0.371921	4.92826	23.6377	1.16362e-06	2.88387e-05
CALCOCO2	0.294583	6.76531	23.6334	1.16625e-06	2.88785e-05
SKA2	-0.331564	5.05178	23.6234	1.1723e-06	2.90029e-05
TAF15	-0.269926	7.75013	23.6135	1.17836e-06	2.91273e-05
NEK2	-0.389625	4.08702	23.6061	1.18289e-06	2.92138e-05
CALCOCO1	0.32971	6.09912	23.5962	1.18903e-06	2.93397e-05
LGALS9B	1.34741	0.612845	23.5923	1.19142e-06	2.93732e-05
WSB2	0.296238	6.38359	23.5811	1.19841e-06	2.95197e-05
HHEX	-0.54396	2.80295	23.5531	1.21592e-06	2.9925e-05
ARHGAP35	-0.286985	6.60848	23.503	1.24801e-06	3.06881e-05
NCOA3	0.280749	7.41348	23.4971	1.25183e-06	3.07552e-05
GALNT10	-0.334459	5.18895	23.4841	1.26032e-06	3.09023e-05
CHD7	-0.302141	6.18319	23.4835	1.26076e-06	3.09023e-05
NFKBIE	0.283223	7.13425	23.4829	1.26109e-06	3.09023e-05
SHC3	0.548872	3.25955	23.4686	1.27051e-06	3.1106e-05
MDGA1	0.494174	4.00379	23.3493	1.35179e-06	3.30675e-05
FTH1P3	0.432232	4.40308	23.2808	1.40081e-06	3.4237e-05
COL11A2	0.30402	6.17287	23.2686	1.40974e-06	3.44253e-05
NEU1	0.245195	10.4879	23.2632	1.41371e-06	3.44926e-05
ANXA4	0.295465	6.31497	23.2054	1.45681e-06	3.54976e-05
LRP6	-0.494336	3.242	23.2046	1.45741e-06	3.54976e-05
SPNS3	-0.729128	1.28057	23.2017	1.45965e-06	3.55215e-05
KIF4A	-0.322477	5.05513	23.1995	1.46126e-06	3.553e-05
SNAP23	-0.296485	6.13398	23.1919	1.4671e-06	3.56414e-05
ACKR3	0.527808	4.25208	23.157	1.49395e-06	3.62626e-05
SLC16A7	-0.497963	3.20422	23.1536	1.49657e-06	3.6295e-05
GOLGA8J	-0.353328	4.5264	23.1432	1.50471e-06	3.64611e-05
LILRA2	-0.297265	6.24366	23.1392	1.50782e-06	3.65052e-05
GNG7	-0.628709	2.44379	23.1133	1.52827e-06	3.69687e-05
ARHGAP21	0.313811	5.771	23.0974	1.541e-06	3.72449e-05
DEF6	-0.296553	5.96648	23.0898	1.54707e-06	3.73595e-05
METTL7B	0.335137	6.37436	23.0019	1.61946e-06	3.90742e-05
NBPF20	0.30819	5.77164	22.9983	1.62248e-06	3.91137e-05
NETO2	-0.305693	5.67504	22.9768	1.64071e-06	3.95197e-05
UBD	5.96967	3.55579	25.3851	1.67675e-06	4.03533e-05
SERPINE2	0.401937	4.43043	22.9031	1.70482e-06	4.09939e-05
WBP1L	-0.302274	5.55659	22.9012	1.70657e-06	4.10012e-05
IGFBP4	-0.309215	5.4796	22.8714	1.73316e-06	4.16045e-05
GORASP1	0.311189	5.70027	22.8498	1.75275e-06	4.20392e-05
KCNK13	-0.464658	3.90659	22.8456	1.75658e-06	4.20954e-05
SMARCA5	0.278699	6.93429	22.8427	1.75927e-06	4.21242e-05
KIF20B	-0.337979	4.74098	22.8338	1.76739e-06	4.22828e-05
TBX1	0.718533	2.04475	22.8148	1.78494e-06	4.26665e-05
C1orf226	0.666915	2.94667	22.7976	1.80104e-06	4.30151e-05
VAC14	0.295136	6.54007	22.7853	1.81255e-06	4.32533e-05
FBN2	-0.329634	5.45089	22.7529	1.84339e-06	4.39524e-05
SPC24	-0.411814	3.73997	22.7443	1.85166e-06	4.41122e-05
MAP1LC3B	0.276827	7.21344	22.6987	1.89609e-06	4.51328e-05
HRH1	0.343189	5.15163	22.6821	1.91256e-06	4.54864e-05
ARL5B	0.345626	5.27283	22.5571	2.04116e-06	4.8504e-05
IKBIP	-0.386209	4.2907	22.501	2.10157e-06	4.98977e-05
ICOSLG	-0.329139	4.92713	22.494	2.10933e-06	5.00399e-05
NUP210	-0.26588	7.30902	22.4598	2.14718e-06	5.08951e-05
PRDX1	0.260901	8.21998	22.4569	2.15046e-06	5.09302e-05
VPS26B	-0.314158	5.52063	22.4398	2.16968e-06	5.13425e-05
PSME1	0.274383	7.46106	22.3968	2.21873e-06	5.24594e-05
SPTBN5	0.423956	3.84326	22.3937	2.22235e-06	5.25009e-05
ATAD2	-0.266624	7.26271	22.3608	2.2607e-06	5.33623e-05
ANP32A	-0.279961	6.62837	22.3413	2.28379e-06	5.38624e-05
UBTF	-0.281666	6.50882	22.3393	2.28618e-06	5.38739e-05
POLH	-0.338393	4.77477	22.3123	2.31852e-06	5.45905e-05
STMN1	-0.267135	7.09033	22.2938	2.34095e-06	5.50726e-05
CEBPA	-0.282034	7.05307	22.2816	2.35593e-06	5.53791e-05
HIP1	-0.606708	2.14452	22.2681	2.37251e-06	5.57224e-05
SHCBP1	-0.299633	5.5227	22.2302	2.41979e-06	5.67857e-05
SLC27A3	0.327669	5.86166	22.2266	2.42443e-06	5.68475e-05
USP25	0.306808	5.58838	22.2129	2.44179e-06	5.72071e-05
ONECUT2	0.616861	2.07676	22.1483	2.52528e-06	5.91141e-05
ZNF536	-0.924691	0.828922	22.1293	2.55043e-06	5.96534e-05
IL6R	0.263929	8.01001	22.1268	2.55376e-06	5.96821e-05
SASH3	-0.309969	5.76712	22.116	2.56818e-06	5.99695e-05
PTPRK	-0.271873	7.11659	22.0899	2.60333e-06	6.07401e-05
CLEC7A	0.694402	2.71712	22.0722	2.62737e-06	6.12505e-05
CD4	-0.272748	6.79228	22.0673	2.63404e-06	6.13554e-05
PCDHB5	-0.452511	3.24006	21.9798	2.75689e-06	6.41641e-05
RORB	1.21395	1.88097	21.9335	2.82421e-06	6.56768e-05
TREM1	-0.708377	2.19284	21.9071	2.8634e-06	6.65334e-05
ABCC1	0.267439	7.44296	21.9035	2.8688e-06	6.66043e-05
CTSK	0.526617	3.7978	21.8967	2.879e-06	6.67863e-05
GTF2IRD2B	0.451199	3.85893	21.8462	2.95579e-06	6.85112e-05
MMS22L	-0.31497	5.0403	21.8157	3.00304e-06	6.95494e-05
LILRB4	0.261194	8.25778	21.7845	3.05229e-06	7.06322e-05
FBP1	0.654473	4.20544	21.735	3.13211e-06	7.24202e-05
SRGAP2D	0.295186	6.04696	21.724	3.15004e-06	7.27752e-05
MIDN	0.296933	6.02751	21.722	3.15339e-06	7.27931e-05
TMEM259	0.259225	7.93526	21.7102	3.17284e-06	7.31823e-05
CLK1	0.308001	5.55102	21.704	3.18304e-06	7.33578e-05
PLXDC2	-0.264588	7.20518	21.6731	3.23479e-06	7.44897e-05
AKAP7	0.593703	2.71198	21.6663	3.24622e-06	7.46922e-05
A2M	-0.22777	11.3619	21.6586	3.2593e-06	7.49321e-05
NBPF9	0.384441	4.3614	21.5637	3.42462e-06	7.86689e-05
BMP2	-0.480709	3.19244	21.5502	3.44872e-06	7.91583e-05
FXYD6	1.81626	-0.5415	21.5416	3.46437e-06	7.94529e-05
FCGR2B	0.525731	3.35166	21.499	3.54213e-06	8.11705e-05
DOCK4	0.355448	5.1781	21.4822	3.57323e-06	8.18168e-05
CYTH1	0.28344	6.1943	21.4602	3.61452e-06	8.26954e-05
GPC4	0.246338	9.44713	21.4491	3.6354e-06	8.31058e-05
STAC2	0.373326	5.47022	21.4426	3.64786e-06	8.33232e-05
NAV1	-0.344846	4.73056	21.4252	3.68116e-06	8.40161e-05
IQGAP1	-0.246445	9.24604	21.3727	3.78331e-06	8.62547e-05
RAB31	-0.240338	9.93288	21.3716	3.78535e-06	8.62547e-05
MAP3K3	-0.300704	5.69779	21.3556	3.81721e-06	8.69108e-05
FILIP1L	-0.430227	3.98626	21.3393	3.8497e-06	8.75799e-05
GASK1B	0.95192	1.76205	21.3315	3.86541e-06	8.78666e-05
DENND4B	0.275117	6.60106	21.2975	3.93469e-06	8.93697e-05
MYEOV	0.395936	4.89342	21.2885	3.9531e-06	8.97157e-05
FOCAD	-0.287952	6.00393	21.2814	3.96775e-06	8.99628e-05
KNL1	-0.341947	4.46449	21.2802	3.97035e-06	8.99628e-05
RALGDS	0.324906	5.28613	21.2784	3.97399e-06	8.99732e-05
CDH2	-0.423008	3.58858	21.2616	4.00901e-06	9.06934e-05
FBRS	0.280116	6.64799	21.2591	4.0143e-06	9.07404e-05
PGM2	-0.268114	6.90892	21.2405	4.05342e-06	9.15516e-05
COL4A4	-0.556785	2.50199	21.1781	4.18742e-06	9.45028e-05
SMG1P3	0.326588	5.12562	21.1466	4.25691e-06	9.59943e-05
TMIGD3	-0.461712	3.35769	21.1297	4.29454e-06	9.67658e-05
ADI1	-0.26933	6.78692	21.1176	4.3217e-06	9.73002e-05
SMG1P1	0.386781	4.34122	21.1102	4.33851e-06	9.76009e-05
DLG5	-0.281211	5.87731	21.1004	4.36064e-06	9.80208e-05
BMP2K	-0.268374	6.92635	21.0938	4.3758e-06	9.82836e-05
CDK6	-0.254434	7.82284	21.0623	4.44839e-06	9.98346e-05
ARFGAP1	0.291927	6.05732	21.052	4.47232e-06	0.000100292
DOT1L	0.251454	8.32754	21.0447	4.48932e-06	0.000100594
KIAA0232	-0.267437	6.80099	21.0252	4.53516e-06	0.000101503
HLTF	-0.349185	4.55041	21.0244	4.53709e-06	0.000101503
MPZL3	-0.604784	2.32125	20.9853	4.63067e-06	0.000103515
SLC44A5	-0.557703	2.05564	20.9788	4.64643e-06	0.000103785
IER2	0.288794	5.92638	20.9724	4.66197e-06	0.00010405
LONP1	0.266443	7.26626	20.9431	4.73372e-06	0.000105546
ACOD1	1.83768	3.61878	22.4049	4.73646e-06	0.000105546
C8orf31	0.592355	2.36752	20.9268	4.77422e-06	0.000106303
SKAP2	-0.290018	5.84375	20.9162	4.80072e-06	0.000106734
VEGFA	0.273616	6.73863	20.9161	4.8011e-06	0.000106734
HNRNPA0	-0.269139	6.59838	20.8984	4.84551e-06	0.000107592
FANCI	-0.270012	6.3266	20.8977	4.84731e-06	0.000107592
TOB1	0.291411	6.29521	20.8708	4.91578e-06	0.000109026
NCAPD2	-0.285767	5.62713	20.8591	4.94602e-06	0.000109611
CD33	-0.293692	5.63472	20.8373	5.0027e-06	0.00011078
SLC2A4RG	-0.285157	5.60776	20.8331	5.01346e-06	0.000110868
GNPDA1	0.283045	6.00753	20.8327	5.0145e-06	0.000110868
ATRN	-0.295337	5.60299	20.8236	5.03849e-06	0.000111311
HAGHL	0.468252	3.54283	20.8076	5.08078e-06	0.000112158
KLHL6	0.276393	6.39628	20.7744	5.16953e-06	0.000114028
ABHD12	0.268615	6.72416	20.77	5.18163e-06	0.000114174
THSD7A	-0.288327	5.64165	20.769	5.18423e-06	0.000114174
KCNMB1	-0.381194	4.09716	20.7583	5.21312e-06	0.000114675
KRT15	-0.953384	0.843554	20.7576	5.21507e-06	0.000114675
ELK3	-0.311741	5.10475	20.754	5.22488e-06	0.000114801
LMNB1	-0.268489	6.54365	20.7424	5.25681e-06	0.000115413
COQ10B	0.316779	5.77083	20.7251	5.3044e-06	0.000116368
PEX5L	0.49148	3.33422	20.7158	5.33031e-06	0.000116845
SYNE3	-0.324127	4.76327	20.6974	5.38158e-06	0.000117878
DLL1	0.522856	2.62517	20.6481	5.52211e-06	0.000120862
SNX2	0.259144	7.27987	20.6334	5.56452e-06	0.000121696
LGALS9C	1.16469	0.733649	20.6071	5.64145e-06	0.000123284
STAR	0.651422	2.19744	20.5917	5.687e-06	0.000124183
RRN3P3	0.799277	1.43888	20.589	5.69517e-06	0.000124265
RGMB	-0.492875	2.52467	20.5678	5.75868e-06	0.000125469
ERLIN2	-0.259919	7.05045	20.5676	5.75918e-06	0.000125469
TLK2	0.29245	5.84032	20.5474	5.82011e-06	0.000126698
BLOC1S3	0.436002	3.88791	20.5441	5.83021e-06	0.000126821
LPAR2	0.357265	4.49408	20.4966	5.97671e-06	0.000129826
KCNC4	0.343204	4.7554	20.4963	5.97758e-06	0.000129826
PRR5L	-0.44624	3.01297	20.4767	6.03936e-06	0.000131068
FCHO2	-0.30579	5.50863	20.4655	6.07477e-06	0.000131735
POLR3D	0.307408	5.61053	20.4626	6.08377e-06	0.000131829
THBS1	-0.318786	4.91329	20.4547	6.10907e-06	0.000132199
PLEKHH1	0.61752	2.75827	20.4543	6.1102e-06	0.000132199
ACSL5	0.280515	6.63077	20.437	6.16595e-06	0.0001333
CCR7	4.01498	-0.528959	20.4355	6.17052e-06	0.0001333
GPR82	-1.02892	-0.120287	20.4272	6.19735e-06	0.000133778
PCYOX1	-0.286384	5.73341	20.3912	6.31504e-06	0.000136214
N4BP2L1	0.510116	3.47688	20.3709	6.38251e-06	0.000137555
NXN	0.35898	4.8303	20.3696	6.38693e-06	0.000137555
TBXAS1	-0.571837	2.53585	20.3393	6.48881e-06	0.000139643
NRIP3	0.292465	6.15375	20.3109	6.58589e-06	0.000141624
HADH	-0.301166	5.26922	20.2994	6.62538e-06	0.000142365
BACE1	-0.293502	5.58367	20.2613	6.75868e-06	0.000145119
CLEC5A	-0.724612	4.52585	20.2573	6.77277e-06	0.000145311
PKD2L1	1.48418	-0.491137	20.2467	6.81053e-06	0.000146011
STAT5A	0.366228	4.4946	20.2374	6.84382e-06	0.000146613
NUSAP1	-0.270298	6.00393	20.2314	6.86509e-06	0.000146958
ANXA1	0.2499	8.19018	20.2291	6.87357e-06	0.000147028
GABBR1	0.877391	1.16316	20.1847	7.03463e-06	0.000150359
PLSCR4	0.922652	1.22902	20.1739	7.07453e-06	0.000151098
C2orf91	-0.778718	0.952219	20.1564	7.13964e-06	0.000152373
SLC31A2	0.269822	7.02834	20.1379	7.20886e-06	0.000153653
DTX2	0.313437	5.52151	20.1375	7.21048e-06	0.000153653
AIFM2	0.388177	4.50325	20.1015	7.34761e-06	0.000156458
CREBRF	0.355656	4.62777	20.0776	7.44008e-06	0.000158308
ELP6	-0.380869	4.11229	20.0627	7.49819e-06	0.000159424
TNFRSF1B	0.246159	8.33139	20.0201	7.66684e-06	0.000162887
FGL2	0.374672	5.59524	20.0087	7.71297e-06	0.000163744
PDXDC2P-NPIPB14P	0.424674	3.90792	20.0012	7.74322e-06	0.000164263
DNAJA4	0.280292	6.20592	19.9956	7.76571e-06	0.000164617
TDRD9	1.98669	0.692083	20.1198	7.78841e-06	0.000164974
DHX34	0.341945	4.97892	19.9704	7.86893e-06	0.000166555
PSMA4	0.258826	7.23187	19.955	7.93236e-06	0.000167772
ST3GAL6	0.291434	5.73746	19.9448	7.97486e-06	0.000168545
LINC00862	0.687029	2.01608	19.9245	8.05989e-06	0.000170215
CXorf21	0.395274	3.9224	19.9149	8.10075e-06	0.00017095
H2AZ2	-0.272473	5.93178	19.9026	8.15292e-06	0.000171923
KIRREL1	-0.468502	2.84476	19.884	8.23252e-06	0.000173472
CACNA1G	0.696978	2.01634	19.8746	8.27313e-06	0.000174198
CMIP	0.288233	5.80373	19.871	8.28876e-06	0.000174397
PINK1	-0.28758	6.27159	19.8631	8.32314e-06	0.00017499
CYB561A3	0.270602	6.5407	19.8469	8.394e-06	0.000176349
SNHG14	-0.343152	4.54174	19.843	8.41082e-06	0.000176571
GRK6	-0.281951	6.13583	19.825	8.49075e-06	0.000178117
PHKB	-0.29001	5.47506	19.8163	8.5295e-06	0.000178797
CHST12	0.415345	3.80462	19.8132	8.54328e-06	0.000178953
CCDC34	-0.56971	2.07441	19.8098	8.5585e-06	0.000179139
NFKBIB	0.389982	4.34642	19.8067	8.57229e-06	0.000179295
GALNT1	-0.260355	7.09854	19.8015	8.59574e-06	0.000179653
PKD1P5-LOC105376752	0.265807	6.47759	19.7917	8.63982e-06	0.000180441
TNFSF9	0.615846	3.35656	19.7766	8.70815e-06	0.000181734
TMEM38B	0.324509	5.18102	19.7721	8.72865e-06	0.000182015
MBOAT2	-0.454483	3.26202	19.7709	8.73452e-06	0.000182015
YJEFN3	0.771073	1.38932	19.7555	8.80482e-06	0.000183345
CD2AP	0.30405	5.39595	19.7489	8.83545e-06	0.000183848
ENPP4	-0.289595	5.66758	19.7183	8.97811e-06	0.000186658
SFI1	0.39011	3.89825	19.7171	8.98374e-06	0.000186658
UBXN11	0.323292	5.06656	19.7064	9.03417e-06	0.000187568
E2F8	-0.450223	2.98256	19.6922	9.10154e-06	0.000188828
HAS3	-0.493689	2.88069	19.6813	9.15337e-06	0.000189765
PHF11	1.15623	0.36503	19.6771	9.17371e-06	0.000190047
C3AR1	0.348728	4.54497	19.6656	9.22885e-06	0.000191049
ERMP1	-0.250634	7.48213	19.6583	9.26449e-06	0.000191647
HENMT1	-0.331082	4.607	19.6488	9.31052e-06	0.000192458
ALAD	-0.288973	5.51329	19.6413	9.34708e-06	0.000193073
TMEM158	-0.250829	7.16964	19.6358	9.3739e-06	0.000193485
ZWINT	-0.268356	5.92486	19.631	9.39767e-06	0.000193835
TPR	-0.249228	7.40164	19.6107	9.49788e-06	0.000195759
RAB3D	-0.486798	3.25718	19.6082	9.51055e-06	0.000195877
NISCH	-0.264374	6.31154	19.5642	9.732e-06	0.000200292
TRIM67	1.13498	0.424559	19.5624	9.74138e-06	0.000200339
CEP55	-0.326152	4.54857	19.5591	9.75787e-06	0.000200533
MMP2	-0.28077	5.87184	19.5194	9.96318e-06	0.000204603
PYGL	-0.283114	6.13999	19.5111	1.00066e-05	0.000205345
PYCR1	-0.441776	3.53176	19.5058	1.00342e-05	0.00020568
ZC3H3	0.311893	5.41282	19.5052	1.00375e-05	0.00020568
KLHL20	0.352028	4.59179	19.4624	1.02647e-05	0.000210186
NCAPG2	-0.270341	5.81761	19.4593	1.02813e-05	0.000210373
DDR1	0.435791	4.16703	19.4578	1.02896e-05	0.00021039
MYO1G	-0.434924	3.16124	19.4243	1.04716e-05	0.000213956
IFIT1B	4.3179	-1.93675	19.4216	1.04866e-05	0.000214107
SEPTIN9	-0.244433	7.88439	19.4187	1.05021e-05	0.00021427
CSRP1	-0.246266	7.67214	19.3722	1.07613e-05	0.0002194
LPGAT1	-0.26064	6.63959	19.3685	1.0782e-05	0.000219664
LOC112268354	5.79305	-0.607936	19.3452	1.09141e-05	0.000222195
NOS1AP	0.928295	1.44066	19.3342	1.09773e-05	0.000223321
NMRK2	3.63662	-1.76635	19.3277	1.10149e-05	0.000223925
ICAM3	-0.30386	5.30076	19.3056	1.11433e-05	0.000226372
ATP9A	0.273275	6.58284	19.3032	1.1157e-05	0.000226488
HACD2	-0.285941	5.6135	19.3015	1.11668e-05	0.000226525
KCNH4	0.457199	3.45541	19.2954	1.12029e-05	0.000227094
LIF	0.530716	5.4699	19.278	1.1305e-05	0.000228999
CASP4	0.278759	6.24522	19.2719	1.13414e-05	0.000229496
PYGB	-0.255274	6.90655	19.2712	1.13457e-05	0.000229496
IGSF6	0.515752	3.73968	19.2123	1.17007e-05	0.000236405
ATP6V1G1	0.261921	7.0074	19.2118	1.1704e-05	0.000236405
PDE7B	-0.587493	1.77252	19.2025	1.17613e-05	0.000237392
NOTCH2NLC	0.422335	3.73075	19.1912	1.18308e-05	0.000238624
RNASEL	0.29525	5.50127	19.1888	1.18461e-05	0.000238764
PLA2G4A	0.361679	4.35032	19.1832	1.18808e-05	0.000239291
XIAP	0.267587	6.51188	19.1796	1.19034e-05	0.000239577
ID3	-0.412479	3.55058	19.1716	1.19531e-05	0.000240405
PALLD	-0.289313	5.53223	19.1666	1.19848e-05	0.000240871
TNFRSF14-AS1	0.661262	2.52177	19.1614	1.20169e-05	0.000241345
DSE	0.295737	6.01609	19.1502	1.2088e-05	0.000242602
ST20	0.690126	2.25423	19.1265	1.22391e-05	0.000245459
ARL3	-0.424678	3.37596	19.1229	1.22618e-05	0.00024574
SYN3	0.980221	1.87732	19.1171	1.22993e-05	0.000246318
PNMA2	1.11904	0.645915	19.1038	1.23851e-05	0.000247861
ST3GAL5	0.261316	6.91229	19.0975	1.24265e-05	0.000248512
HCG26	0.699943	1.67539	19.0816	1.253e-05	0.000250405
ARHGEF6	-0.292852	5.26095	19.0719	1.25942e-05	0.000251511
BACH2	0.367372	4.43604	19.0687	1.2615e-05	0.000251748
KIFC1	-0.243483	7.33212	19.0391	1.28124e-05	0.000255504
SESN1	-0.267154	6.2316	19.0378	1.28213e-05	0.000255504
CCL3L1	1.46253	0.209289	19.0219	1.29283e-05	0.000257456
SLC2A3	-0.314687	5.47426	19.0148	1.29763e-05	0.000258229
CCNY	-0.275514	5.79478	19.0126	1.29912e-05	0.000258345
ADRA2B	0.380805	4.33706	18.9872	1.31657e-05	0.000261631
CITED2	0.233996	9.08983	18.9443	1.34648e-05	0.000267387
ARPP19	-0.242181	7.76074	18.9344	1.35351e-05	0.000268594
MCM4	-0.243341	7.37971	18.9269	1.35882e-05	0.000269384
EMB	-0.26208	6.26226	18.9261	1.3594e-05	0.000269384
KIF3C	-0.414617	3.78036	18.918	1.36515e-05	0.000270334
LRCH1	0.284181	5.85082	18.9119	1.36953e-05	0.000271011
MME	2.30145	-1.48271	18.9019	1.37677e-05	0.000272253
SGSH	0.282877	5.67022	18.898	1.37956e-05	0.000272615
MIR155HG	0.424455	3.77665	18.8495	1.41513e-05	0.000279441
TMEM106C	-0.326572	4.4535	18.8482	1.41608e-05	0.000279441
CREG1	0.248953	7.92829	18.8272	1.43174e-05	0.000282335
UTRN	-0.262849	6.3531	18.8013	1.45127e-05	0.000285987
PTPRJ	-0.239837	8.0833	18.7886	1.46103e-05	0.000287709
SLC46A1	-0.398041	3.66246	18.7821	1.46603e-05	0.000288492
RFC1	-0.264701	6.15576	18.7767	1.47012e-05	0.000289096
CSK	-0.245264	7.28349	18.7681	1.47675e-05	0.000290199
HMMR	-0.2778	5.37443	18.7549	1.48708e-05	0.000292026
ACOT11	-0.392156	3.74823	18.7381	1.50019e-05	0.000294395
UBE2E3	-0.280285	5.42381	18.7322	1.50486e-05	0.000294947
SULT1C2	1.1715	1.01224	18.7319	1.50509e-05	0.000294947
UGGT1	-0.251081	6.99684	18.7257	1.50996e-05	0.000295697
NR2F2	0.3161	5.29692	18.7058	1.52587e-05	0.000298606
TNIP2	0.338773	4.75959	18.7008	1.52983e-05	0.000299174
H3-5	0.457172	3.36696	18.6742	1.55133e-05	0.000303168
CLCN4	-0.550086	2.03596	18.6644	1.55929e-05	0.000304514
ZFP69B	-0.316825	4.95691	18.6628	1.56063e-05	0.000304565
NUF2	-0.322785	4.44564	18.6545	1.56743e-05	0.000305682
NAA30	0.27422	6.15801	18.6256	1.59136e-05	0.000310135
CETN3	-0.439096	3.26873	18.6225	1.59396e-05	0.000310428
LOC339192	0.552966	3.21242	18.6183	1.59748e-05	0.000310899
RAB27A	-0.292641	5.61228	18.6045	1.60905e-05	0.000312935
LILRB2	0.580846	2.80609	18.5982	1.61444e-05	0.000313767
CARHSP1	-0.285195	5.31173	18.5885	1.62261e-05	0.000315139
ARHGDIB	-0.23721	7.98429	18.5736	1.6354e-05	0.000317404
EZR	0.241233	7.82226	18.5702	1.6383e-05	0.000317749
SLC6A8	0.30163	5.88323	18.5676	1.6405e-05	0.000317958
SPRY4	-0.281966	5.9978	18.5386	1.66566e-05	0.000322613
BRI3BP	-0.278997	5.61555	18.5366	1.66742e-05	0.000322733
TADA3	-0.251003	6.8487	18.5344	1.66933e-05	0.000322882
SHROOM2	-0.63933	1.86761	18.5181	1.68366e-05	0.00032543
PAK1	-0.28355	5.88495	18.5038	1.69637e-05	0.000327664
CBX8	-0.495762	2.91916	18.4702	1.72656e-05	0.000333268
GALNT2	-0.235105	8.13814	18.3813	1.80902e-05	0.000348946
STAT6	0.240966	7.68677	18.3581	1.83113e-05	0.00035297
HMGB2	-0.249713	6.43661	18.345	1.84376e-05	0.000355162
ZDHHC20	-0.250808	6.78675	18.3396	1.84904e-05	0.000355937
LYST	0.24249	7.49844	18.3343	1.85412e-05	0.000356671
H3-3B	0.23168	8.63931	18.3232	1.86497e-05	0.000358514
PDGFA	-0.254376	6.13668	18.3207	1.86747e-05	0.000358753
TRAF5	0.919953	0.540805	18.3192	1.8689e-05	0.000358783
LPAR1	-0.379507	4.09804	18.3136	1.87438e-05	0.000359591
LPL	0.218402	10.3472	18.261	1.92691e-05	0.000369417
BAIAP2-DT	-0.269709	5.85786	18.2154	1.97353e-05	0.0003781
NOTCH2NLA	0.427581	3.57678	18.196	1.9938e-05	0.000381725
PLEKHN1	1.02602	0.555516	18.1806	2.00998e-05	0.000384562
SCAMP1-AS1	0.793737	0.969097	18.1699	2.02128e-05	0.000386462
TNFAIP8L2	-0.303558	5.13119	18.1584	2.0335e-05	0.000388535
UNK	0.31183	4.9325	18.1271	2.06718e-05	0.000394545
TSC22D2	0.314506	5.20735	18.1266	2.06774e-05	0.000394545
NSMAF	0.255301	6.74233	18.1145	2.08099e-05	0.000396806
PFKFB4	0.253057	7.0156	18.074	2.12571e-05	0.000405059
IL15	1.0951	1.67316	18.0619	2.13928e-05	0.000407216
PLEKHM2	0.248692	7.07908	18.0613	2.13991e-05	0.000407216
NKD1	0.462211	3.15103	18.0593	2.14211e-05	0.000407361
CKAP2L	-0.29459	4.81053	18.0309	2.17439e-05	0.000413222
SORCS1	-0.311775	4.71443	18.0273	2.17847e-05	0.000413719
SLC16A10	0.418681	3.55923	18.0137	2.19407e-05	0.000416401
EPAS1	0.462284	3.22118	18.0064	2.20254e-05	0.000417729
LRSAM1	0.378762	4.17869	17.9905	2.22101e-05	0.00042095
DAP	-0.24562	7.01405	17.9642	2.25188e-05	0.000426514
MYO7A	-0.408361	3.29618	17.939	2.28186e-05	0.000431904
ADPGK-AS1	1.18008	1.38579	17.9172	2.30813e-05	0.000436584
TBL1XR1	-0.251514	6.50664	17.9107	2.31603e-05	0.000437785
NUDT21	-0.24958	6.49793	17.8976	2.33213e-05	0.000440533
TUBA1A	-0.23608	7.68252	17.8592	2.37957e-05	0.000449195
ERCC6L	-0.466362	2.65913	17.8546	2.3853e-05	0.000449976
ZNF804A	0.294118	5.6472	17.8465	2.39551e-05	0.000451601
LOC105747689	1.2706	0.293776	17.8433	2.39954e-05	0.000451861
CBX1	-0.26464	5.69274	17.8429	2.40008e-05	0.000451861
SNX9	0.237214	8.0181	17.8324	2.41329e-05	0.000454046
NR4A2	0.737065	1.52679	17.8248	2.42297e-05	0.000455563
DCUN1D3	0.444898	4.05723	17.8164	2.43369e-05	0.000457276
NBPF11	0.335042	4.48383	17.8078	2.4447e-05	0.000459039
TPX2	-0.249556	6.22794	17.8063	2.44667e-05	0.000459105
GSG1L	0.387064	4.94236	17.8028	2.45122e-05	0.000459653
FAM210B	-0.348049	4.18075	17.7953	2.46091e-05	0.000461164
SKA1	-0.337764	4.10237	17.7653	2.49998e-05	0.000468176
ADAM10	-0.231304	8.13602	17.7487	2.52189e-05	0.000471965
DBN1	-0.241695	7.42791	17.7376	2.53663e-05	0.00047441
PPP6R1	-0.229348	8.39671	17.7354	2.53959e-05	0.00047465
MTHFD1L	-0.290478	5.1351	17.731	2.5454e-05	0.000475421
ZNF462	0.657671	2.22524	17.6849	2.60786e-05	0.000486765
SFXN2	-0.59825	1.631	17.6702	2.62817e-05	0.000490208
ARL15	0.39864	4.23635	17.669	2.62977e-05	0.000490208
CBX2	-0.523249	2.40577	17.6673	2.63215e-05	0.00049033
TRIM24	0.287074	5.79674	17.6615	2.64022e-05	0.000491508
PLCG2	-0.263006	6.06944	17.652	2.65336e-05	0.000493537
SPN	-0.232513	7.84139	17.6509	2.65493e-05	0.000493537
TOP2B	-0.23905	7.27084	17.6499	2.65635e-05	0.000493537
C2orf92	0.50201	3.42541	17.6441	2.66444e-05	0.000494714
GDPD1	-0.686877	1.79883	17.6384	2.67238e-05	0.000495864
TLCD2	-0.750237	1.52806	17.6258	2.69023e-05	0.000498848
SNX14	-0.245469	6.8964	17.6106	2.71175e-05	0.000502509
WDR81	0.262581	6.07689	17.6088	2.71426e-05	0.000502645
HJURP	-0.307696	4.52403	17.5966	2.73179e-05	0.000505559
TTC7B	0.315832	5.0767	17.5735	2.76523e-05	0.000511414
JAZF1	-0.50223	2.38753	17.5722	2.76708e-05	0.000511422
ILK	-0.246626	6.76249	17.5583	2.78735e-05	0.000514831
DGCR5	0.454665	3.5527	17.5298	2.8294e-05	0.000522257
RUSC1-AS1	1.37447	-0.575031	17.5212	2.84223e-05	0.000524282
ATP6V1C1	0.238939	7.41711	17.4883	2.89184e-05	0.000532782
SPATA13	0.505912	3.81396	17.4882	2.89207e-05	0.000532782
RGL2	-0.224065	9.02197	17.4808	2.90327e-05	0.000534497
KRR1	0.261814	6.04841	17.4164	3.00335e-05	0.000552561
CDIP1	0.296521	5.30568	17.4081	3.01648e-05	0.000554617
RAB4A	-0.262989	5.76627	17.3953	3.03692e-05	0.000558011
IFNGR2	0.224714	8.72406	17.3599	3.09397e-05	0.000568125
GINS4	-0.316452	4.40509	17.357	3.09873e-05	0.000568631
BLM	-0.321102	4.35111	17.3431	3.12149e-05	0.000572435
LRRC20	-0.593812	1.73021	17.3132	3.17102e-05	0.000581141
GIMAP4	0.838349	2.95508	17.3011	3.1912e-05	0.000584461
DDHD1	0.30053	5.13763	17.294	3.20315e-05	0.00058627
ALDH6A1	-0.438485	3.19543	17.2588	3.26309e-05	0.000596522
ADGRG6	0.627465	2.24898	17.2586	3.26338e-05	0.000596522
SPATS1	1.64426	-0.683987	17.2566	3.26689e-05	0.000596777
CTSH	0.231124	7.84899	17.2519	3.27491e-05	0.000597856
FGD5-AS1	-0.238076	6.99094	17.2402	3.29513e-05	0.00060116
NDRG2	0.251894	7.3828	17.2098	3.34828e-05	0.000610463
TMEM164	-0.251823	6.33234	17.2081	3.35135e-05	0.000610627
NR5A2	-0.74097	1.08907	17.1869	3.38894e-05	0.000617079
PDE4A	0.26591	6.00621	17.1709	3.41752e-05	0.000621883
ADGRL2	-0.242385	6.71744	17.1632	3.43146e-05	0.000624018
GLIPR2	0.253572	6.31612	17.1615	3.43454e-05	0.000624176
THBS2	-0.509832	2.09027	17.1572	3.4422e-05	0.000625167
TTC38	0.300951	4.96677	17.1518	3.4521e-05	0.000626564
TRIM45	-0.567168	1.79904	17.1265	3.49834e-05	0.000634549
NPIPB13	0.889913	0.767235	17.125	3.50108e-05	0.000634639
DTX1	1.32134	-0.581625	17.1205	3.50939e-05	0.000635736
MATK	0.259741	6.21913	17.0998	3.54797e-05	0.000642313
CADM1	0.341977	4.3029	17.0806	3.58397e-05	0.000648417
PDS5B	-0.272033	5.4767	17.0691	3.60568e-05	0.000651927
STIM1	-0.258298	5.92935	17.0343	3.67237e-05	0.000663507
EIF4EBP2	-0.239842	7.00463	17.0332	3.67442e-05	0.000663507
SLC2A1	-0.249804	6.58057	17.0235	3.69331e-05	0.000666492
C1S	1.12302	2.45311	17.1303	3.69675e-05	0.000666688
SP9	0.320472	4.72987	17.0166	3.70669e-05	0.000668054
CTNNBIP1	-0.438304	3.03945	16.9937	3.75179e-05	0.000675753
MILR1	-0.275312	5.33604	16.9896	3.75986e-05	0.000676775
CHRNB1	0.761992	1.57281	16.9547	3.82958e-05	0.000688887
DTL	-0.262839	5.48169	16.9085	3.92395e-05	0.000705412
MUC20	0.929904	1.6798	16.8999	3.94174e-05	0.000707881
RRP1	0.296494	5.13421	16.8995	3.94269e-05	0.000707881
GUSBP11	0.413298	3.52103	16.8945	3.95289e-05	0.000709094
CKAP5	-0.242266	6.54471	16.8934	3.95534e-05	0.000709094
STAB1	-0.481716	2.27108	16.8922	3.9577e-05	0.000709094
HCG15	-1.11241	-0.0431442	16.8914	3.95947e-05	0.000709094
PLXNB2	-0.2198	8.99512	16.8646	4.01567e-05	0.000718703
CPD	-0.225166	8.30363	16.8579	4.03004e-05	0.00072082
PPID	0.284701	5.34354	16.8413	4.06543e-05	0.000726689
COL5A3	0.320208	5.427	16.8161	4.11976e-05	0.000735936
FBXO45	-0.263218	5.69093	16.8105	4.13185e-05	0.00073763
VLDLR	-0.504763	2.88087	16.8024	4.14955e-05	0.000740322
NHLRC3	0.313982	4.95409	16.7935	4.16904e-05	0.00074333
UXS1	0.24797	6.59703	16.7545	4.2555e-05	0.00075816
FHOD1	-0.246413	6.179	16.7536	4.25758e-05	0.00075816
TACC3	-0.245154	6.11293	16.7515	4.26236e-05	0.000758533
ITGA11	-0.339762	3.98341	16.736	4.29734e-05	0.000764278
SLC12A2	-0.326014	4.51205	16.7089	4.35921e-05	0.000774794
CAMK1	-0.226649	7.92954	16.7005	4.37854e-05	0.00077774
ATRX	-0.244346	6.57815	16.6945	4.39226e-05	0.000779688
AP2A2	-0.232359	7.35234	16.6891	4.40492e-05	0.000781445
COL18A1	-0.269796	5.4119	16.6755	4.43652e-05	0.00078608
ABHD17A	0.247086	6.27623	16.6755	4.43661e-05	0.00078608
SCAF4	0.259114	6.05413	16.6711	4.44676e-05	0.000787386
CDC73	0.24216	6.80885	16.6406	4.51902e-05	0.00079968
LSS	0.250794	6.29616	16.6286	4.54758e-05	0.00080423
CCNE1	-0.359455	3.80549	16.6257	4.55449e-05	0.000804895
FLOT2	-0.237302	6.91447	16.6247	4.55703e-05	0.000804895
ABHD10	-0.322651	4.52906	16.6095	4.59353e-05	0.000810351
DENND5A	0.301608	4.67938	16.6095	4.59365e-05	0.000810351
IFNB1	4.20727	-2.1936	16.6044	4.6059e-05	0.000811685
ZNF408	0.441536	3.34321	16.604	4.60695e-05	0.000811685
GBX2	1.32995	0.13386	16.5967	4.62469e-05	0.000814165
VCL	-0.22949	7.45305	16.5956	4.62739e-05	0.000814165
NDFIP2	-0.250058	6.37247	16.5947	4.62967e-05	0.000814165
RGS19	-0.26876	5.48751	16.5809	4.66335e-05	0.000819578
ARHGAP9	-0.272998	5.27625	16.5756	4.67636e-05	0.000821355
MAN1A2	-0.242357	6.72515	16.5485	4.74376e-05	0.000832675
RSPO3	1.51756	2.12042	17.4318	4.77325e-05	0.000837333
LST1	-0.236367	7.33307	16.5323	4.78453e-05	0.000838792
DCSTAMP	0.229429	8.50019	16.5297	4.79107e-05	0.000839416
DNAJC10	-0.23228	7.27094	16.5248	4.80329e-05	0.000841036
LPCAT1	0.260762	6.00817	16.507	4.84867e-05	0.000848458
CENPM	-0.375845	3.40197	16.5002	4.8661e-05	0.00085098
CDH23	0.318085	5.91311	16.4912	4.88919e-05	0.000854491
GLT8D1	-0.289143	4.9896	16.4746	4.93232e-05	0.000861495
NCALD	-0.427441	2.93847	16.4596	4.97151e-05	0.000867804
PTGDS	0.350866	5.05364	16.4488	4.99997e-05	0.000872235
RREB1	0.260344	5.81242	16.4382	5.02802e-05	0.000876586
DLX3	-0.297078	4.99653	16.431	5.04699e-05	0.000879352
ASF1B	-0.271224	5.09802	16.4288	5.05284e-05	0.000879829
NFKB1	0.256545	6.02507	16.4265	5.05888e-05	0.000880339
GGA1	0.253927	6.2169	16.4183	5.08104e-05	0.000883651
DUXAP8	0.383474	3.8178	16.4152	5.08915e-05	0.000884517
SLC35F6	0.26165	6.15421	16.412	5.09789e-05	0.000885492
SYTL3	0.279485	5.55646	16.4071	5.11107e-05	0.000887236
RIOX1	0.328733	4.67159	16.4026	5.1231e-05	0.00088878
ZNF33A	-0.370635	3.62566	16.3652	5.22528e-05	0.000905951
CDC7	-0.384943	3.41857	16.3592	5.24197e-05	0.000908287
CASD1	-0.465494	2.73085	16.3554	5.2523e-05	0.00090952
MTMR12	-0.265311	5.49226	16.3392	5.2975e-05	0.000916785
CEP78	-0.317667	4.28708	16.3305	5.32172e-05	0.000920413
C11orf45	0.423774	3.41471	16.2893	5.43867e-05	0.000940066
TTYH3	0.213814	9.50601	16.2808	5.46331e-05	0.000943748
HMGB1	-0.221437	7.95813	16.2713	5.49078e-05	0.000947913
HIVEP3	-0.23556	6.92795	16.2701	5.49413e-05	0.000947913
B3GALNT1	-0.537511	1.90226	16.2675	5.50186e-05	0.000948669
AR	-0.266325	5.31816	16.245	5.5675e-05	0.000959401
PRKACA	-0.248111	6.18806	16.2193	5.64335e-05	0.000971879
FBXO5	-0.304124	4.44364	16.2144	5.65819e-05	0.000973843
MKI67	-0.22778	6.9882	16.1817	5.75653e-05	0.000990027
DCK	-0.260395	5.37887	16.1808	5.75923e-05	0.000990027
AFF1	0.23278	7.33824	16.1756	5.7753e-05	0.00099179
OXCT1	-0.33159	4.10953	16.1752	5.7765e-05	0.00099179
DMXL2	0.251654	6.43021	16.1732	5.7826e-05	0.000992235
APH1B	-0.376206	4.05992	16.1688	5.79609e-05	0.000993946
CD9	0.245802	6.40743	16.1627	5.81451e-05	0.000996502
CHST7	0.366329	4.02872	16.136	5.89723e-05	0.00101007
TCAIM	-0.306515	4.62357	16.1127	5.97032e-05	0.00102197
DCAF5	0.253321	5.93851	16.1088	5.98254e-05	0.00102344
TCF19	-0.228995	6.90555	16.0885	6.04679e-05	0.0010338
CSGALNACT2	0.248331	6.21309	16.0785	6.07893e-05	0.00103867
ZSWIM6	0.270237	5.68338	16.0725	6.09815e-05	0.00104132
HDAC5	-0.236359	6.68215	16.0595	6.14022e-05	0.00104788
ANXA5	0.213508	9.39944	16.0559	6.15194e-05	0.00104924
FZD8	0.576695	2.64731	16.0526	6.16251e-05	0.00105041
SEPHS1	-0.292914	4.75357	16.0429	6.19425e-05	0.00105519
PDE1B	0.34435	4.07555	16.0368	6.21422e-05	0.00105792
NPTX1	0.253608	5.73196	16.035	6.22013e-05	0.00105792
SNX6	0.234804	6.97666	16.0346	6.22154e-05	0.00105792
PAM16	1.51842	-0.900467	16.0302	6.23602e-05	0.00105975
TEX264	-0.23098	7.06817	16.0287	6.24103e-05	0.00105996
LOC152048	0.816885	1.07905	16.0242	6.25567e-05	0.00106181
KIF23	-0.276028	4.88651	16.0196	6.27094e-05	0.00106376
ICAM5	0.360459	4.33009	16.0099	6.3033e-05	0.00106861
TRPC5OS	-0.781317	0.504171	15.9867	6.38105e-05	0.00108115
RFX5	0.248534	6.19901	15.9674	6.44643e-05	0.00109157
ESCO2	-0.271294	5.00219	15.9603	6.4706e-05	0.00109501
PPM1J	0.605584	1.89939	15.9375	6.54896e-05	0.0011076
IL10	1.01266	0.930919	15.9134	6.63274e-05	0.0011211
COMMD6	-0.264396	5.253	15.8757	6.76611e-05	0.00114296
THBD	0.213635	9.02386	15.872	6.77955e-05	0.00114412
RUFY3	0.442192	3.18838	15.8716	6.78103e-05	0.00114412
ZMIZ1	0.218148	8.33222	15.8548	6.84158e-05	0.00115364
CLINT1	-0.275803	5.07065	15.8348	6.91397e-05	0.00116516
GMIP	0.23837	6.74276	15.8291	6.93506e-05	0.00116801
CLGN	-0.452095	2.47216	15.8128	6.99484e-05	0.00117738
MIR6753	1.01604	0.361744	15.7939	7.06524e-05	0.00118852
WIPF1	0.232593	6.76088	15.7816	7.11121e-05	0.00119555
SASH1	-0.237533	6.28053	15.7796	7.11873e-05	0.0011961
SEMA6A	-0.742276	1.37043	15.7773	7.12726e-05	0.00119682
FYCO1	0.263117	5.70426	15.77	7.15495e-05	0.00120076
ENPP2	3.71671	-0.582418	15.7635	7.17975e-05	0.0012038
LYN	0.222212	8.02354	15.763	7.18156e-05	0.0012038
NTNG2	1.88946	-1.19339	15.7616	7.18698e-05	0.00120399
HSD17B8	-0.744709	0.914349	15.7549	7.21235e-05	0.00120752
FCHSD1	0.310423	4.81652	15.7537	7.21698e-05	0.00120759
CAPN2	0.213827	8.97008	15.7473	7.24145e-05	0.00121096
MCC	0.610354	2.08535	15.7419	7.26212e-05	0.0012137
ARHGAP11A	-0.23042	6.66017	15.7401	7.26914e-05	0.00121416
TGIF1	0.27257	5.62008	15.7295	7.30998e-05	0.00122026
LZTS1	-0.338385	4.18832	15.7054	7.40341e-05	0.00123512
MYOM1	-0.548803	1.76442	15.6842	7.48702e-05	0.00124808
STC2	0.673443	1.25888	15.6835	7.48989e-05	0.00124808
SOS2	-0.255158	5.69097	15.6645	7.56554e-05	0.00125994
LANCL3	-0.288174	4.86972	15.662	7.57528e-05	0.00126082
LINC00106	0.605883	1.88429	15.6576	7.59298e-05	0.00126302
ATP23	-0.478857	2.58286	15.6477	7.633e-05	0.00126894
SYNE1	-0.346751	3.62518	15.643	7.65198e-05	0.00127134
HSF4	0.574166	1.91098	15.6375	7.67433e-05	0.00127431
PYGO1	0.422776	3.30701	15.619	7.74939e-05	0.00128602
HLA-C	0.204274	10.1351	15.6092	7.78983e-05	0.00129145
PNPLA3	0.410948	3.84207	15.6089	7.79125e-05	0.00129145
NRGN	-0.23418	6.39593	15.5735	7.93825e-05	0.00131504
S1PR2	0.343156	4.12078	15.5709	7.94932e-05	0.00131589
RAP2B	-0.25376	5.68889	15.5701	7.9527e-05	0.00131589
TBC1D16	-0.249285	5.85917	15.5518	8.02976e-05	0.00132787
NCK2	-0.225481	7.01722	15.5397	8.08158e-05	0.00133566
WASHC1	0.33404	4.19223	15.5289	8.12784e-05	0.00134252
CDCA8	-0.30342	4.26585	15.5273	8.13462e-05	0.00134285
SHANK3	0.357846	4.23085	15.5204	8.16438e-05	0.00134698
PGA4	-0.705163	0.796791	15.497	8.2662e-05	0.00136298
CACNA1A	0.643838	1.53879	15.4788	8.34626e-05	0.00137538
SPAG9	0.217157	8.20947	15.462	8.42064e-05	0.00138645
PTPN4	-0.493859	2.44287	15.4614	8.42326e-05	0.00138645
SYNPO	-0.894031	0.630925	15.4533	8.4594e-05	0.00139159
IKZF1	-0.238959	6.31202	15.4512	8.46894e-05	0.00139235
SPATA18	0.986273	1.53172	15.4459	8.49257e-05	0.00139543
SIPA1L1	0.273702	5.40553	15.443	8.50582e-05	0.00139679
NRIP1	0.266149	5.68528	15.4357	8.53844e-05	0.00140133
SIAE	-0.262839	5.37493	15.4294	8.56701e-05	0.00140521
ELF4	0.242321	6.42651	15.4191	8.61398e-05	0.00141209
MYPN	3.63163	0.632313	16.4335	8.68681e-05	0.00142321
ATP7A	-0.282662	4.97486	15.4016	8.69426e-05	0.0014236
APPL2	-0.414065	3.04997	15.3752	8.81615e-05	0.00144273
LRP1	-0.215854	8.05525	15.3721	8.83063e-05	0.00144426
PRRG1	0.34175	4.39851	15.3639	8.86942e-05	0.00144941
PGA5	-0.951088	-0.0619702	15.3632	8.87237e-05	0.00144941
ACTR2	-0.204714	9.79685	15.354	8.91579e-05	0.00145566
IRAK1BP1	-0.475554	2.4683	15.3461	8.95301e-05	0.0014609
RHOC	-0.210624	8.94233	15.3116	9.11805e-05	0.00148697
PLEKHF1	0.39805	4.25141	15.2994	9.17742e-05	0.00149579
SNCG	-0.64993	1.12254	15.2857	9.24385e-05	0.00150575
FES	-0.308601	4.39298	15.2618	9.36169e-05	0.00152406
EIF4B	-0.218822	7.58931	15.2536	9.40263e-05	0.00152985
RNA28SN5	0.190209	11.4418	15.2517	9.41196e-05	0.00153049
STRADB	-0.303711	4.50348	15.2493	9.42414e-05	0.00153159
GPSM2	-0.248476	5.41831	15.2418	9.46147e-05	0.00153677
GINS2	-0.344414	3.69076	15.2378	9.48139e-05	0.00153912
MYL6	-0.207026	9.38739	15.2258	9.54171e-05	0.00154802
PREPL	-0.248014	5.72559	15.2225	9.55881e-05	0.00154991
TMCO3	-0.250809	5.79095	15.2028	9.65857e-05	0.00156519
C3orf70	-0.587468	1.49006	15.1872	9.73881e-05	0.00157729
RUNX3	0.226413	6.9611	15.1426	9.97192e-05	0.00161412
GCNT2	0.663233	1.92823	15.1285	0.000100466	0.00162527
HNF4G	0.446996	3.50546	15.1256	0.000100618	0.0016268
KCTD20	-0.220143	7.35403	15.1183	0.000101008	0.00163218
MXD3	-0.422696	2.69611	15.0859	0.000102759	0.00165952
PLA2G15	-0.219169	7.35076	15.0829	0.000102919	0.00166115
TBC1D8B	-0.36247	3.60765	15.0787	0.00010315	0.00166394
TTK	-0.257425	5.10859	15.0686	0.000103703	0.00167191
NCKAP1	0.256263	5.99171	15.0603	0.000104158	0.00167828
UBFD1	0.243537	6.01564	15.0274	0.000105989	0.00170681
LPCAT4	-0.301702	4.58968	15.0254	0.000106105	0.0017077
WDR34	-0.276037	4.83075	15.0217	0.000106313	0.00171007
VASH1	-0.228137	6.9318	15.0167	0.000106596	0.00171302
PHF20	-0.251271	5.68716	15.0163	0.000106617	0.00171302
RAD9A	0.378243	3.60459	14.9904	0.000108088	0.00173566
GPR156	0.942726	0.740035	14.9783	0.000108787	0.0017459
HIF1A	0.213283	8.15985	14.9674	0.000109416	0.001755
MED29	-0.246014	5.83744	14.965	0.000109556	0.00175625
KDM6A	3.79624	-1.29811	14.95	0.00011043	0.00176926
NPR1	0.395939	4.95978	14.9486	0.000110513	0.00176958
MTRNR2L8	0.702834	1.2969	14.9382	0.000111122	0.00177757
RHBDF1	0.263143	5.58738	14.9379	0.000111138	0.00177757
C11orf68	0.29669	4.73309	14.914	0.000112557	0.00179925
ABCB4	-0.391936	3.22406	14.9024	0.00011325	0.00180932
EHD1	0.25122	5.85202	14.8776	0.000114748	0.00183221
MGC12916	0.421773	3.15554	14.8535	0.000116222	0.00185471
NSD2	-0.222246	6.74218	14.847	0.000116624	0.00186006
MALT1	0.241118	6.1786	14.8426	0.000116899	0.0018634
TACC2	-0.265377	5.21622	14.8404	0.000117037	0.0018638
HLA-DQA2	5.3511	0.244513	15.603	0.000117056	0.0018638
DICER1	-0.234462	6.17303	14.839	0.000117122	0.00186381
PTPRO	-0.334855	3.88484	14.834	0.000117429	0.00186764
ODF2	-0.259638	5.15881	14.8184	0.000118409	0.00188217
MRVI1	-1.00687	-0.425746	14.8147	0.000118641	0.00188428
ABR	0.20816	8.85139	14.8141	0.000118675	0.00188428
SLC25A15	-0.410949	3.25498	14.8047	0.000119268	0.00189263
CLEC3B	-0.754544	0.570832	14.7963	0.000119802	0.00190003
SCIMP	1.20104	0.507269	14.7763	0.000121083	0.00191927
CABIN1	-0.241336	5.87953	14.7572	0.000122313	0.00193769
SLC35E2B	-0.237405	5.94746	14.7368	0.000123644	0.00195734
PCDHGC3	-0.223934	6.75606	14.7359	0.000123704	0.00195734
PRC1	-0.227772	6.14804	14.735	0.000123762	0.00195734
UBR7	-0.214956	7.58308	14.7312	0.000124012	0.00196021
MCM5	-0.222279	6.79264	14.7239	0.000124492	0.00196669
ACOT1	0.290891	4.98882	14.7212	0.000124673	0.00196846
DAB2	0.216859	7.74417	14.7086	0.000125505	0.00198048
USP53	-0.340036	4.0166	14.6978	0.000126228	0.00199078
HS3ST3B1	0.2607	6.05284	14.6936	0.000126512	0.00199415
MATN2	-0.392719	3.0386	14.6844	0.000127127	0.00200273
FAM111B	-0.343412	3.64322	14.6731	0.00012789	0.00201363
HERC2	-0.216371	7.46021	14.6681	0.000128234	0.00201792
ZNF367	-0.301994	4.38514	14.6618	0.000128659	0.00202348
CASP3	0.242257	6.12017	14.6488	0.000129549	0.00203635
MAP3K8	0.484095	2.70863	14.6212	0.000131465	0.00206532
LMBRD2	-0.25738	5.32519	14.6128	0.000132049	0.00207334
GOT1	-0.333514	4.07361	14.5995	0.000132985	0.00208586
CCDC92	-0.260999	5.11665	14.5994	0.000132994	0.00208586
H6PD	-0.224815	6.67509	14.5854	0.000133982	0.00210019
IKBKE	0.225808	6.73886	14.5734	0.00013484	0.00211248
PBK	-0.272801	4.69261	14.5647	0.000135463	0.00212106
PPP3CA	-0.24109	5.7094	14.5598	0.000135817	0.00212542
TK1	-0.238435	5.58437	14.5436	0.000136986	0.00214253
GOLGA8H	-0.433307	2.52077	14.5397	0.000137275	0.00214586
BAIAP2	0.236445	6.50513	14.5328	0.000137779	0.00215255
PDE3A	-0.625422	1.25889	14.5277	0.000138152	0.00215718
USP30-AS1	1.83064	0.405277	14.5228	0.000138507	0.00216154
LOC730101	-0.415564	2.76714	14.5183	0.000138842	0.00216556
CENPE	-0.264937	4.79229	14.5103	0.00013943	0.00217354
INKA1	-0.560971	1.57522	14.5087	0.000139553	0.00217426
EIF3L	-0.21279	7.65726	14.4943	0.000140622	0.00218907
LOC101928304	1.31655	-0.202419	14.4938	0.000140659	0.00218907
MYO15B	0.257615	5.25397	14.4927	0.000140737	0.00218909
DOK2	-0.234569	6.15247	14.4835	0.000141427	0.00219862
AKAP8L	0.245489	5.89432	14.4824	0.00014151	0.0021987
ASH1L-AS1	0.787256	0.972454	14.4615	0.000143094	0.00222209
CTSC	-0.209789	7.88118	14.4578	0.000143376	0.00222524
LDLRAD4	-0.386794	3.8145	14.4392	0.000144794	0.00224602
CACNA2D4	-0.29025	4.58753	14.4326	0.000145305	0.0022527
CEP120	-0.325356	4.00553	14.4046	0.000147476	0.00228512
CASC4	-0.221575	6.80195	14.3949	0.000148242	0.00229573
CAMKK1	0.386027	3.42391	14.3855	0.000148981	0.00230591
OSTM1	0.216773	7.66338	14.3747	0.000149844	0.00231799
SMARCA2	-0.219641	6.99104	14.3498	0.000151834	0.0023475
WDR37	-0.256703	5.36073	14.3381	0.000152782	0.00236086
EPB41L3	0.407494	3.31967	14.3299	0.000153448	0.00236985
CRYL1	-0.282909	4.76921	14.3226	0.000154047	0.0023778
ZNRD1	-0.29338	4.63967	14.3106	0.000155028	0.00239075
LOC100996724	0.574349	3.30147	14.3103	0.000155055	0.00239075
NFKBID	0.421234	3.03203	14.28	0.000157567	0.00242739
SSBP2	-0.324908	3.97815	14.2796	0.000157603	0.00242739
KIF1B	0.225781	7.03763	14.2733	0.00015813	0.00243419
ZSWIM8	0.24164	5.97979	14.2649	0.000158836	0.00244372
CASP8	0.241625	5.82552	14.2624	0.000159049	0.00244567
ATN1	0.238908	6.10377	14.2606	0.000159206	0.00244676
INAFM2	-0.231931	6.26163	14.2569	0.000159512	0.00244905
LINC01914	0.993711	0.0635969	14.2568	0.000159528	0.00244905
DHRSX	0.243961	5.84472	14.2381	0.000161115	0.00247206
PXDC1	0.685541	1.76722	14.2343	0.00016144	0.00247571
C3	0.225371	7.38301	14.2304	0.000161782	0.0024796
IRS1	0.387936	4.20144	14.2154	0.000163073	0.00249803
CUL4B	0.234212	5.95294	14.1855	0.000165683	0.00253626
LONP2	-0.234777	6.14938	14.1848	0.000165747	0.00253626
TXLNB	-0.340728	3.80649	14.1578	0.000168137	0.00257144
RCSD1	-0.256743	5.44861	14.1553	0.000168365	0.00257352
FSTL1	0.410447	3.41803	14.1363	0.000170074	0.00259824
HIPK1	-0.210015	7.74731	14.1333	0.000170343	0.00260096
ZNF438	0.270139	5.33667	14.1319	0.000170469	0.00260147
BCL2	-0.303087	4.35518	14.1156	0.000171958	0.00262278
TCEAL9	0.266187	5.23425	14.1138	0.000172121	0.00262385
GPR68	-0.245198	5.843	14.1104	0.000172434	0.0026272
ELF1	0.217718	7.0648	14.1048	0.000172946	0.00263359
TGFBR3	-0.530558	1.64367	14.0872	0.000174568	0.00265686
TIFA	-0.344141	3.91272	14.0748	0.000175721	0.00267297
LINC00205	-0.290071	4.60261	14.0729	0.000175907	0.00267436
TYMS	-0.224153	6.07915	14.0596	0.000177148	0.00269177
VRK1	-0.313737	4.06528	14.0553	0.000177557	0.00269654
CLMP	0.271084	4.87325	14.042	0.000178817	0.00271422
MYDGF	0.215351	7.41171	14.0355	0.000179432	0.00272208
IFFO2	-0.315725	4.21376	14.0326	0.000179715	0.00272492
SMC1A	-0.212299	7.19908	14.0128	0.000181618	0.00275229
GADD45A	-0.408549	2.86295	14.0093	0.000181949	0.00275585
ADAM9	-0.193881	10.0089	14.0057	0.000182299	0.00275886
SEC22A	-0.375784	3.47099	14.005	0.000182374	0.00275886
TPM2	0.230426	6.20978	14.0043	0.000182441	0.00275886
PPP1R16B	-0.310575	4.00153	13.9982	0.000183032	0.00276631
RPA1	-0.23784	5.58177	13.9929	0.000183543	0.00277256
MAFB	0.202516	8.45727	13.9804	0.000184776	0.00278969
POPDC3	0.430683	3.4549	13.9665	0.000186147	0.00280889
RSU1	-0.227963	6.38628	13.9627	0.000186519	0.00281301
TICRR	-0.327811	3.66002	13.9608	0.000186712	0.00281442
POLA1	-0.28527	4.31731	13.9581	0.000186974	0.00281687
MCOLN2	0.497225	2.54454	13.9533	0.000187458	0.00282265
TNFAIP8	0.241221	5.85133	13.9401	0.000188779	0.00284103
FBXO4	-0.383403	3.17844	13.9248	0.000190317	0.00286265
MAD2L1BP	0.243015	5.77887	13.9201	0.000190793	0.00286829
FUT7	-0.493432	2.41171	13.917	0.00019111	0.00287152
TPGS2	-0.236417	5.63983	13.9122	0.000191595	0.00287729
ZNF311	0.551123	1.71716	13.9017	0.000192675	0.00289196
MCM3	-0.209667	7.40967	13.8958	0.000193275	0.00289944
FAM53B	-0.248673	5.75572	13.8873	0.000194154	0.00291041
RNF13	0.218666	6.99395	13.8867	0.000194213	0.00291041
SLC7A6OS	0.301433	4.39973	13.8744	0.000195487	0.00292795
TRMT61A	0.344972	3.91408	13.8672	0.000196236	0.00293761
PIK3R1	0.227269	6.17515	13.8628	0.000196703	0.00294305
SEMA4A	0.466679	3.4369	13.8604	0.000196955	0.00294527
TAF5L	-0.232638	5.89979	13.8536	0.00019767	0.00295439
PTMS	-0.271565	4.88139	13.8235	0.000200856	0.00300042
FCGR1B	-0.298211	5.10428	13.8153	0.000201739	0.00301203
DBI	0.209609	7.48958	13.8068	0.000202646	0.00302356
CBWD5	-0.251925	5.37499	13.8061	0.000202726	0.00302356
ARG2	-0.69463	1.15184	13.7926	0.000204189	0.00304378
ATP2B4	-0.201809	8.72517	13.7903	0.000204443	0.00304597
SOAT1	0.222361	6.72866	13.7888	0.000204598	0.00304667
PLP2	-0.218071	6.62901	13.7833	0.000205205	0.00305409
RAB32	0.264349	5.13946	13.7803	0.000205527	0.00305728
UBE2Z	0.217856	6.94416	13.7717	0.000206469	0.00306968
PRXL2B	0.333874	4.25507	13.7608	0.000207674	0.00308597
HMGA2-AS1	0.883643	0.40188	13.7589	0.00020788	0.00308741
PLEKHF2	0.267007	5.06328	13.7558	0.000208231	0.003091
DIS3L	-0.330549	3.8781	13.7547	0.000208353	0.0030912
ABLIM3	-0.283524	4.54607	13.728	0.000211336	0.0031338
ZFAND5	0.204515	8.22671	13.7253	0.00021164	0.00313666
PTPN18	-0.27107	4.66159	13.72	0.000212236	0.00314385
ETV1	-0.373085	3.34123	13.7171	0.000212557	0.00314696
HTT	-0.204889	8.11964	13.7075	0.000213656	0.00316157
ZSCAN30	-0.310745	4.10153	13.7047	0.000213965	0.00316449
RMI1	-0.290648	4.36447	13.6917	0.000215453	0.00318483
SERHL2	-0.427041	2.7995	13.6857	0.000216144	0.00319338
LOC100130872	0.687588	1.43185	13.6777	0.00021707	0.00320481
RASA4	0.235596	5.93805	13.677	0.000217145	0.00320481
COPG2	-0.339241	3.98092	13.6759	0.00021728	0.00320514
NPFFR2	1.5134	-0.327199	13.6743	0.000217463	0.00320595
SETD3	-0.223788	6.49807	13.6734	0.000217562	0.00320595
CEBPD	0.381123	3.4365	13.6647	0.000218578	0.00321924
LILRA5	2.06417	0.193948	13.6478	0.000220547	0.00324655
RBM19	0.290618	4.7624	13.6366	0.000221875	0.00326431
SUN2	-0.201038	8.264	13.6356	0.000221984	0.00326431
MAP3K10	0.341041	4.12738	13.6327	0.000222332	0.00326772
SCD	0.189161	10.3967	13.6315	0.000222479	0.00326819
GOLGA2P11	0.607266	1.7646	13.627	0.000223007	0.00327424
SPACA6	0.691751	1.41516	13.6076	0.000225327	0.00330659
RTN4RL2	0.323812	4.33272	13.5992	0.000226329	0.00331957
SMG1	0.21011	7.34168	13.5955	0.000226776	0.00332441
IVD	-0.227271	6.1349	13.5845	0.000228113	0.00334226
RABAC1	0.272678	5.10846	13.5739	0.000229412	0.00335955
OVCA2	0.791867	0.799044	13.5709	0.000229774	0.00336312
RASSF5	-0.20819	7.69148	13.5646	0.000230548	0.0033727
CHST11	0.199569	8.91939	13.5564	0.000231554	0.00338566
CRYM	1.57331	-1.11919	13.5378	0.000233861	0.00341763
MAGI3	-0.344949	3.55123	13.5348	0.000234237	0.00342136
TPST2	-0.220407	6.46522	13.5329	0.000234468	0.00342221
GPAM	-0.444929	2.80587	13.5324	0.000234537	0.00342221
HELB	0.654829	1.61574	13.5289	0.000234969	0.00342675
CXCR5	0.774576	1.87272	13.525	0.000235464	0.00343219
LZTS2	0.23532	5.89633	13.5199	0.0002361	0.00343886
LOC100133331	0.336597	4.06316	13.5194	0.000236165	0.00343886
RMDN3	0.236529	6.32218	13.5151	0.000236708	0.003445
HRH2	-0.337399	3.68394	13.5116	0.000237151	0.00344966
FOXF1	1.40032	0.810023	13.5061	0.000237842	0.00345795
TSEN34	0.230103	6.3898	13.5038	0.000238139	0.00346048
RRM1	-0.220914	6.1658	13.5009	0.000238509	0.00346407
HDAC1	-0.222196	6.2812	13.4969	0.000239018	0.00346969
FEM1B	0.213931	7.00094	13.4927	0.000239547	0.00347558
PTX3	0.842024	1.09647	13.4846	0.00024059	0.00348892
ANKRD50	0.245386	5.76582	13.4499	0.000245074	0.00355213
TGFBR1	-0.211062	7.05474	13.4479	0.000245343	0.0035542
KLRC1	-1.24461	-1.37101	13.4389	0.000246521	0.0035688
UBE4B	-0.237066	5.6312	13.4382	0.000246603	0.0035688
SIX1	0.658768	1.971	13.4253	0.00024831	0.00359167
HOOK3	-0.213617	6.80791	13.3843	0.000253803	0.00366924
DBF4B	0.3551	3.29415	13.3768	0.000254812	0.00368194
MBOAT7	0.201089	8.45231	13.3697	0.000255787	0.00369415
RNA28SN2	0.181786	10.9848	13.3662	0.000256251	0.00369897
ZNF224	0.30628	4.26335	13.3647	0.000256466	0.00370017
SMURF2	-0.257174	5.15438	13.362	0.000256828	0.00370132
EVI2A	-0.211378	6.947	13.362	0.000256829	0.00370132
FCRLB	0.441624	3.65254	13.3606	0.000257023	0.00370132
PRKAR1A	-0.198125	8.5982	13.3603	0.000257069	0.00370132
SERPINA1	-0.271452	5.35882	13.3538	0.000257965	0.00371152
ZFYVE28	0.372853	3.4284	13.3532	0.00025804	0.00371152
BTBD3	-0.257178	4.92413	13.3417	0.000259629	0.00373247
WDR60	-0.419198	2.91576	13.3386	0.000260054	0.0037367
RHBDD3	0.307622	4.31326	13.3252	0.000261916	0.00376153
CIT	-0.277434	4.29899	13.3209	0.00026253	0.00376844
PAPLN	0.278193	4.57051	13.3191	0.000262774	0.00377003
ALOX5	-0.223365	5.83789	13.2972	0.000265859	0.00381235
CDC6	-0.252512	5.0816	13.2757	0.000268931	0.00385445
ZNF316	0.270521	4.90897	13.2668	0.000270211	0.00387083
NBPF25P	0.382396	3.33894	13.2617	0.000270941	0.00387933
CHST14	-0.303101	4.12483	13.2565	0.000271696	0.00388642
SLC2A9	-0.374087	3.34604	13.2564	0.000271712	0.00388642
PCDHGA10	-0.425893	2.82378	13.2483	0.000272883	0.00390046
ZBTB22	0.213287	7.06255	13.2477	0.000272968	0.00390046
GET1	-0.397688	3.13978	13.2335	0.000275047	0.00392816
MAP2	0.449255	3.15483	13.2308	0.000275449	0.00393193
RAPGEF6	-0.249649	5.20171	13.2215	0.000276814	0.00394941
TMEM156	-0.931702	-0.132432	13.2085	0.00027874	0.00397489
SIN3B	0.249885	5.33759	13.2072	0.000278931	0.00397561
RBBP6	0.226109	6.04589	13.2057	0.000279168	0.00397698
SRGAP2C	0.21589	6.73607	13.1963	0.000280567	0.00399491
ARID4A	-0.268023	4.87147	13.1947	0.000280798	0.00399617
GIGYF1	0.243267	5.41091	13.1906	0.000281417	0.00400297
GOLGA8K	-0.426966	2.35388	13.186	0.000282108	0.00401079
SEC31B	0.330634	3.93934	13.1829	0.000282582	0.0040149
ANP32E	-0.216107	6.46217	13.1822	0.000282681	0.0040149
CCDC93	0.23358	5.85244	13.1807	0.000282916	0.00401622
CHST2	0.325512	4.29651	13.1735	0.000284005	0.00402965
SNORA70	0.852526	0.369552	13.1716	0.000284281	0.00403154
GIPR	0.463998	3.00214	13.1689	0.000284696	0.00403541
LINC-PINT	0.733269	1.61533	13.1658	0.000285161	0.00403997
ZCCHC24	-0.279904	4.75616	13.1586	0.00028626	0.00405178
TFDP2	-0.355715	3.37229	13.1585	0.000286281	0.00405178
LUZP1	-0.222023	6.32407	13.1568	0.000286534	0.00405333
[truncated: 26,279 more rows]

## Sheet: qlf.MAFBsimtb_vs_contmtb
Gene	logFC	logCPM	F	PValue	FDR
CHODL	-4.40282	5.35942	2369.97	0	0
CXCL10	-3.86642	7.54205	1858.56	0	0
ABCG1	3.7257	6.10346	2100.05	0	0
LBH	-3.48963	7.2558	2739.84	0	0
LIF	3.43624	5.4699	1643.57	0	0
CD163	-3.22196	6.9506	2291.36	0	0
IGFN1	3.01305	6.64326	1948.61	0	0
MAFB	-2.73109	8.45727	2124.96	0	0
MYD88	-2.70593	6.75049	1767.15	0	0
C5AR1	-2.61745	7.98764	1840.97	0	0
MSR1	-2.53855	8.53833	1872.17	0	0
C5AR2	-2.40718	8.64533	1742.73	0	0
CHIT1	2.36706	7.37809	1520.09	0	0
FCGBP	-3.38826	5.0407	1429.45	7.96847415881879e-312	0
COL6A3	2.10194	9.10405	1414.89	0	2.0939e-305
THBS1	-3.86688	4.91329	1371.22	2.99042e-299	5.28519e-296
SLC7A8	-2.24049	7.55853	1366.58	3.00528e-298	4.99902e-295
GM2A	2.04247	9.2061	1351.41	5.70375e-295	8.9606e-292
APOC1	2.01963	8.56035	1279.23	2.23819e-279	3.33113e-276
MMP8	-3.78945	4.43773	1268.44	4.82063e-277	6.81589e-274
CDH23	2.3544	5.91311	1164.89	1.16545e-254	1.56936e-251
MMRN2	-3.5984	4.46437	1116.44	3.48675e-244	4.48174e-241
ATP6V1C2	-2.37941	5.47207	1081.57	1.2188e-236	1.49849e-233
TLR2	-1.95182	7.72498	1046.24	5.35623e-229	6.31097e-226
RCAN1	-1.93319	7.27323	1034.21	2.14737e-226	2.42894e-223
GBP4	-2.32372	7.1524	1022.61	6.95073e-224	7.55972e-221
LGI2	-2.005	6.77326	1013.74	5.75529e-222	6.02771e-219
MYLK	1.92503	7.01152	1009.67	4.36732e-221	4.41069e-218
RSAD2	-1.81709	8.07204	994.331	9.13078e-218	8.90345e-215
FBP1	3.10576	4.20544	986.839	3.81928e-216	3.60005e-213
APOE	1.72014	8.87786	965.195	1.84767e-211	1.68543e-208
TMEM158	-1.88575	7.16964	959.578	3.03552e-210	2.68245e-207
CCN1	3.20034	4.28831	959.27	3.54004e-210	3.03349e-207
TRIB1	1.82706	7.65829	954.412	3.98594e-209	3.31513e-206
CSF1	1.60405	10.4608	945.088	4.15836e-207	3.35971e-204
CEMIP	-2.04792	6.04827	939.996	5.26161e-206	4.133e-203
DCSTAMP	1.7231	8.50019	933.806	1.15106e-204	8.79719e-202
CMPK2	-1.8513	6.98862	923.088	2.40742e-202	1.7915e-199
EFNB2	2.39628	5.41897	919.963	1.14348e-201	8.29113e-199
INHBA	2.2073	5.88542	917.483	3.9366e-201	2.78298e-198
TIMP3	1.51682	11.0674	898.24	5.77349e-197	3.98202e-194
IFI44L	-1.94018	6.45248	861.727	4.66098e-189	3.13817e-186
STAC2	2.02417	5.47022	815.919	3.89486e-179	2.56137e-176
TIE1	1.6684	7.31133	794.659	1.57157e-174	1.01002e-171
NPR1	2.32136	4.95978	790.513	1.24393e-173	7.81684e-171
LINC01010	1.90737	5.81378	790.295	1.3867e-173	8.52457e-171
PSD3	1.56896	8.27027	774.441	3.77711e-170	2.27253e-167
HERC5	-1.841	5.58914	773.403	6.34038e-170	3.73527e-167
TM4SF1	5.71638	2.92246	759.987	5.11916e-167	2.95428e-164
IFIT2	-1.68522	6.56483	758.257	1.21396e-166	6.86566e-164
GAL	1.76444	6.18708	746.378	4.55477e-164	2.52549e-161
GMFB	-1.73184	6.37241	744.887	9.58485e-164	5.21231e-161
TRIM22	-1.72016	6.49817	738.084	2.85727e-162	1.52449e-159
SCD	1.41096	10.3967	736.807	5.4042e-162	2.83e-159
INA	-2.89416	4.11495	731.712	6.87048e-161	3.53243e-158
TNFSF10	-1.86644	6.21383	730.297	1.39263e-160	7.03229e-158
RRAD	2.2522	5.24528	727.804	4.83102e-160	2.3967e-157
FCRLA	1.70723	6.40312	724.739	2.23008e-159	1.08728e-156
S100A9	2.26929	5.77196	717.057	1.03187e-157	4.94563e-155
CLEC5A	3.22263	4.52585	715.973	1.77259e-157	8.35423e-155
SLC5A3	1.50687	8.22171	712.776	8.73994e-157	4.05161e-154
IFITM1	-1.63448	7.05691	712.124	1.21004e-156	5.51897e-154
NDRG2	1.57353	7.3828	708.783	6.41197e-156	2.87806e-153
ISG20	-2.66191	4.53102	699.91	5.37659e-154	2.37561e-151
CCL2	-1.75781	6.65018	699.873	5.47629e-154	2.38244e-151
TSPAN17	1.49155	8.18062	697.134	2.14971e-153	9.21054e-151
SLC29A3	1.68286	6.18816	683.247	2.20315e-150	9.29862e-148
TIMP1	1.34366	10.5635	680.318	9.50735e-150	3.95366e-147
RAI14	1.48547	7.9622	676.381	6.78761e-149	2.78174e-146
CLIP4	1.81461	5.37957	673.169	3.37354e-148	1.36281e-145
LOXL4	-1.77131	5.8088	669.598	2.00615e-147	7.99013e-145
NAV3	2.68489	4.4011	665.676	1.42163e-146	5.58347e-144
MLPH	2.60661	4.13699	646.69	1.86139e-142	7.21047e-140
IFIT1	-1.42569	7.79009	636	3.87541e-140	1.48093e-137
SNCB	2.71533	3.99205	633.165	1.59613e-139	6.01805e-137
ADGRG1	1.54795	6.73004	627.88	2.23572e-138	8.31865e-136
CYP1B1	1.38419	8.33133	619.812	1.25687e-136	4.61581e-134
OAS2	-1.373	8.439	615.804	9.3055e-136	3.3736e-133
PDGFRB	2.37184	4.13799	605.022	2.02931e-133	7.26391e-131
AP2A1	1.50244	6.71903	601.742	1.0445e-132	3.69205e-130
PDGFA	-1.56883	6.13668	601.709	1.06221e-132	3.70831e-130
SLC16A6	2.04193	4.68821	590.847	2.41309e-130	8.32164e-128
APOBEC3G	-1.73858	5.54302	587.218	1.47832e-129	5.03662e-127
NR1H3	1.9225	5.45062	586.032	2.67387e-129	9.0014e-127
CXCL11	-3.42828	4.79656	582.911	1.27131e-128	4.22943e-126
NT5DC2	-1.57373	6.06709	582.242	1.77601e-128	5.83975e-126
CD52	1.29545	9.17379	567.816	2.396e-125	7.78782e-123
ITGB5	-1.2935	9.11337	564.508	1.25066e-124	4.01888e-122
CREG1	1.34757	7.92829	562.586	3.26803e-124	1.03835e-121
CCL20	1.50818	6.51891	560.098	1.13262e-123	3.55869e-121
WBP1L	-1.66035	5.55659	556.08	8.43641e-123	2.62159e-120
PLAU	-1.30083	8.74346	555.603	1.07059e-122	3.29066e-120
PDP1	1.44611	6.87569	552.083	6.21528e-122	1.88985e-119
C3	1.37141	7.38301	549.77	1.97385e-121	5.93794e-119
MFSD12	1.26061	9.38799	544.013	3.50636e-120	1.04079e-117
MMP19	-1.42278	6.96627	543.997	3.53333e-120	1.04079e-117
CCL7	-2.51185	5.07796	543.037	5.70777e-120	1.66396e-117
CCL8	-2.65104	6.37383	540.816	1.73197e-119	4.99761e-117
GLIS3	-1.58077	5.92581	537.464	9.24647e-119	2.64113e-116
STEAP3	1.47666	6.07159	537.226	1.04149e-118	2.94511e-116
SGK1	1.26945	8.7602	536.716	1.34429e-118	3.76374e-116
SECTM1	-2.43667	5.93606	535.782	2.14356e-118	5.94271e-116
XIRP1	1.63036	6.17096	535.476	2.49802e-118	6.85815e-116
DDIT4L	-1.6918	5.29315	532.299	1.22186e-117	3.3223e-115
RTN4R	1.60493	5.43994	529.2	5.75069e-117	1.54874e-114
CD300A	-1.83679	5.0076	528.775	7.11152e-117	1.89717e-114
METTL7B	1.48834	6.37436	527.214	1.55156e-116	4.10047e-114
NPTX1	-1.56784	5.73196	525.059	4.55523e-116	1.19271e-113
PTGDS	1.73402	5.05364	524.432	6.23239e-116	1.61688e-113
IL1RN	1.15974	10.8457	523.18	1.16528e-115	2.99562e-113
DLG5	-1.52394	5.87731	522.573	1.57807e-115	4.02024e-113
ADAMTS15	-1.67089	5.1995	521.374	2.8728e-115	7.2533e-113
CD93	-1.3838	6.75637	520.282	4.95938e-115	1.24107e-112
JAG1	-1.73768	5.15629	517.568	1.92538e-114	4.77595e-112
ACP5	1.42939	6.30116	515.556	5.26338e-114	1.29424e-111
UBA7	-1.3665	6.75794	513.907	1.20008e-113	2.92551e-111
TNFSF13B	-1.70426	5.49576	512.277	2.71023e-113	6.55042e-111
GSG1L	1.78035	4.94236	511.509	3.97918e-113	9.53586e-111
CDK5RAP2	1.32056	7.25865	511.178	4.69409e-113	1.11546e-110
PLEKHA4	-1.88416	4.30404	511.152	4.75665e-113	1.1209e-110
CPA4	4.7599	2.29713	508.944	1.4341e-112	3.35152e-110
ABCA4	3.90038	2.71252	508.228	2.05083e-112	4.75356e-110
BABAM2	1.47867	5.98042	507.79	2.55312e-112	5.86968e-110
ZNF618	-1.56971	5.6307	505.512	7.97371e-112	1.81839e-109
MRAS	1.24102	8.50351	505.343	8.67409e-112	1.96229e-109
STAT2	-1.29639	7.58919	500.231	1.11696e-110	2.50679e-108
ADARB1	-1.52933	5.64041	499.672	1.47738e-110	3.28955e-108
DDX58	-1.28807	7.30877	496.47	7.32295e-110	1.6178e-107
MERTK	-1.32349	7.26766	493.854	2.70735e-109	5.93477e-107
PHLDA3	1.47536	5.64003	493.691	2.93712e-109	6.38892e-107
ABCA1	1.2069	9.15352	493.286	3.59687e-109	7.7643e-107
RGS2	-1.30286	7.17149	491.916	7.13587e-109	1.5287e-106
CHRNA9	5.30175	2.16513	487.293	7.19591e-108	1.52997e-105
LSP1	1.40993	6.66721	484.801	2.50144e-107	5.27878e-105
IER3	1.23793	8.18127	484.746	2.57147e-107	5.38637e-105
RDH10	1.42964	6.09378	482.797	6.8128e-107	1.41656e-104
TEAD3	2.40809	3.93634	481.645	1.21163e-106	2.5009e-104
DUSP2	1.38853	6.31081	481.179	1.53008e-106	3.13534e-104
AGO2	-1.2822	7.20283	479.002	4.54352e-106	9.24329e-104
SLC9A9	-2.45217	3.59615	475.896	2.14656e-105	4.33575e-103
ZNF532	-1.47831	5.82339	473.666	6.54558e-105	1.31274e-102
FANCE	1.42282	5.94928	465.833	3.2885e-103	6.54875e-101
WIPF1	-1.31733	6.76088	464.3	7.07634e-103	1.39933e-100
TRIM2	-1.43316	5.97176	463.883	8.71987e-103	1.71236e-100
SPRED1	-1.33042	6.78262	463.002	1.35484e-102	2.63109e-100
ZNFX1	-1.23852	7.63973	462.996	1.35844e-102	2.63109e-100
SBSN	3.39097	2.64707	462.171	2.05256e-102	3.94845e-100
GPAT3	1.33074	7.14149	461.7	2.59693e-102	4.96189e-100
TMEM119	-3.75516	2.19751	461.221	3.30006e-102	6.26303e-100
GBP1	-1.44607	8.16264	453.556	1.52482e-100	2.87459e-98
IFI44	-1.29226	6.65532	452.733	2.30145e-100	4.30996e-98
TBC1D2	1.34357	6.03786	451.57	4.11809e-100	7.66127e-98
CXCL8	1.19323	8.84239	451.13	5.13037e-100	9.48212e-98
LINC02009	2.269	3.77962	450.805	6.0348e-100	1.10813e-97
DGAT2	1.28597	6.83628	448.974	1.50823e-99	2.7516e-97
MX2	-1.22603	7.202	444.816	1.20676e-98	2.18748e-96
CD109	-1.14467	8.8361	441.637	5.91723e-98	1.06578e-95
PLXNC1	1.29987	6.63169	439.29	1.91361e-97	3.42488e-95
LRRC8A	1.15943	8.41379	438.962	2.25504e-97	4.01056e-95
CHI3L1	0.91159	13.839	438.673	2.60521e-97	4.60439e-95
MRC2	-1.15947	8.28757	437.941	3.75741e-97	6.5995e-95
TMEM106A	-1.5423	5.50623	436.125	9.31966e-97	1.6268e-94
NDRG1	1.20415	7.59526	435.809	1.09167e-96	1.89388e-94
NEAT1	-1.22781	7.01706	431.004	1.20762e-95	2.08225e-93
VGF	2.44719	3.34489	430.857	1.29941e-95	2.22695e-93
HLA-DMB	1.79074	6.6662	429.555	2.49228e-95	4.24558e-93
MFSD2A	1.17318	7.89131	428.757	3.71504e-95	6.29066e-93
SELENON	1.09656	9.72994	427.378	7.405e-95	1.24642e-92
LPAR6	-1.2808	6.66635	426.344	1.24214e-94	2.07841e-92
TRANK1	-1.27346	6.34274	425.953	1.51043e-94	2.51247e-92
KCNF1	3.64888	2.55283	425.594	1.80752e-94	2.98908e-92
OAF	1.16594	7.76206	424.492	3.13658e-94	5.15676e-92
VGLL4	-1.29138	6.38419	424.39	3.30118e-94	5.39599e-92
PYROXD2	-1.78918	4.46855	424.304	3.44556e-94	5.59963e-92
SMOX	-1.50522	5.27514	422.674	7.78677e-94	1.25825e-91
CCL22	1.39016	5.62802	422.051	1.06353e-93	1.70879e-91
RAB7B	-1.13705	8.5779	420.24	2.63223e-93	4.20533e-91
GFOD1	1.33302	6.1998	419.428	3.94978e-93	6.27482e-91
HSPB7	1.2125	7.01654	419.222	4.37851e-93	6.91707e-91
HAP1	2.88911	3.31899	418.825	5.3425e-93	8.39306e-91
IFI16	-1.13954	8.09882	416.94	1.37142e-92	2.14259e-90
TMEM104	1.37527	5.62054	416.146	2.04066e-92	3.17065e-90
SLA	1.17608	7.53564	415.682	2.57395e-92	3.97738e-90
FAM43A	1.47631	5.33934	415.542	2.76032e-92	4.24219e-90
HMGCS1	1.14702	7.98458	415.228	3.23065e-92	4.93818e-90
ZFP36L2	1.17115	7.45189	413.533	7.54197e-92	1.14662e-89
MAP3K7CL	-1.79845	4.45098	412.932	1.01887e-91	1.54073e-89
SMIM14	1.32699	5.8269	411.792	1.80159e-91	2.70986e-89
IL36B	3.42018	2.35305	410.125	4.14821e-91	6.20651e-89
DTX3L	-1.13642	7.93975	408.224	1.07418e-90	1.59872e-88
CLMP	-1.62227	4.87325	408.204	1.08459e-90	1.60576e-88
PNOC	-1.91329	4.38844	407.898	1.26441e-90	1.86224e-88
LACC1	-1.19429	7.08339	406.674	2.33266e-90	3.41777e-88
PRKAA1	-1.33487	5.83536	404.85	5.80987e-90	8.46863e-88
METTL7A	-1.78056	4.23022	404.424	7.18911e-90	1.04253e-87
TFEB	1.25243	6.46828	403.694	1.0357e-89	1.49426e-87
COL13A1	2.85978	2.96159	402.851	1.57945e-89	2.2672e-87
TMEM255A	-1.30741	5.62077	401.365	3.32255e-89	4.7452e-87
ANXA2	1.05287	9.87621	399.716	7.58025e-89	1.07716e-86
SERPINE1	1.27428	6.20628	399.553	8.22381e-89	1.16277e-86
FZD6	-1.56327	4.84974	399.526	8.3373e-89	1.17295e-86
MEF2C	-1.14059	7.63399	398.395	1.4682e-88	2.05534e-86
RAP1GAP	2.02485	3.86451	398.148	1.66109e-88	2.3139e-86
TSPAN7	2.74366	2.90905	394.677	9.43397e-88	1.30771e-85
COL5A3	1.40454	5.427	392.761	2.46171e-87	3.39572e-85
SYNGR1	1.88102	4.09595	391.803	3.97582e-87	5.45768e-85
MRPS6	1.17024	7.12207	390.441	7.85762e-87	1.07342e-84
ARHGEF10	1.3763	5.38586	388.75	1.83154e-86	2.49002e-84
PPARD	1.08409	8.53376	385.139	1.1158e-85	1.50969e-83
B4GALNT3	1.31531	5.87508	384.721	1.37584e-85	1.85266e-83
CTSC	-1.11097	7.88118	384.649	1.4261e-85	1.91125e-83
AHCYL1	1.05578	9.19488	382.122	5.05065e-85	6.7369e-83
HK2	1.07333	8.7582	381.761	6.04912e-85	8.03085e-83
TFRC	1.06779	8.59646	380.318	1.24587e-84	1.64629e-82
SHB	1.48139	4.96474	380.144	1.35917e-84	1.78766e-82
IL1B	1.02144	10.0265	377.23	5.84252e-84	7.64883e-82
CEBPA	1.1479	7.05307	376.226	9.65535e-84	1.25822e-81
ABTB2	2.0844	3.92925	376.195	9.80602e-84	1.27199e-81
P2RX4	-1.26097	6.10811	375.456	1.41972e-83	1.8332e-81
TM4SF19	1.15599	6.84522	375.383	1.47256e-83	1.89278e-81
MMP14	-0.940308	11.6811	374.867	1.90624e-83	2.43912e-81
MAP1B	1.48099	4.95101	373.381	4.01064e-83	5.10869e-81
NCF2	1.30286	6.10861	373.067	4.69353e-83	5.95173e-81
TRDN	-2.99913	2.4395	371.948	8.21546e-83	1.0363e-80
NCOA7	-1.24332	5.9288	371.941	8.24553e-83	1.0363e-80
IFIT3	-1.0684	8.19424	371.511	1.02264e-82	1.27956e-80
SSBP3	1.13355	7.10709	371.327	1.12145e-82	1.39702e-80
PINK1	1.21189	6.27159	369.219	3.22151e-82	3.99552e-80
RNASE1	-2.40489	3.20252	366.804	1.07896e-81	1.33235e-79
IL36RN	3.72907	2.0783	366.324	1.37205e-81	1.6869e-79
DMKN	5.24549	1.5011	365.999	1.61367e-81	1.97539e-79
RAB1A	1.0642	8.17229	364.188	3.99583e-81	4.87044e-79
STRA6	2.49726	3.21867	363.896	4.62553e-81	5.61376e-79
HEY2	-3.53436	2.04285	362.252	1.0532e-80	1.27275e-78
OCSTAMP	1.22512	6.39557	361.727	1.36976e-80	1.64826e-78
TRIM14	-1.09932	7.11575	361.149	1.82879e-80	2.1913e-78
ITM2C	-1.09374	7.36901	360.679	2.31453e-80	2.76162e-78
SOX13	1.79739	4.17059	359.842	3.51976e-80	4.18201e-78
TXNIP	-1.04844	8.4852	358.447	7.0739e-80	8.3697e-78
EPSTI1	-1.09633	7.35408	356.052	2.34653e-79	2.7648e-77
MYH9	-0.98515	10.0687	355.765	2.70843e-79	3.17797e-77
STC1	1.87913	4.14663	355.442	3.18379e-79	3.7203e-77
SH3BP5	1.14739	6.71884	353.505	8.39571e-79	9.77012e-77
ARL4C	-1.09732	7.24647	353.257	9.50508e-79	1.10158e-76
AIF1	-1.08491	7.60865	352.814	1.1868e-78	1.3698e-76
DENND3	-1.23824	5.96603	351.695	2.07769e-78	2.38833e-76
CASP1	-1.31921	5.52361	350.734	3.36203e-78	3.84904e-76
LINC02158	3.08602	2.77706	350.338	4.09936e-78	4.67427e-76
SLC12A8	1.14103	6.5771	349.229	7.14124e-78	8.11004e-76
DOCK3	1.91908	3.89075	348.377	1.09416e-77	1.23762e-75
CRABP2	1.14141	6.64729	348.328	1.12164e-77	1.26365e-75
USP18	-1.10032	6.8326	347.994	1.32571e-77	1.48763e-75
TDO2	-0.978644	10.0833	347.575	1.63507e-77	1.82754e-75
MT2A	-1.46219	4.69517	347.494	1.70251e-77	1.89541e-75
G6PD	1.09743	7.14928	346.298	3.09871e-77	3.43629e-75
PTK2	1.48843	4.68248	346.192	3.26715e-77	3.60892e-75
FZD7	-1.36512	5.39342	345.107	5.62538e-77	6.18967e-75
TNS1	1.15259	6.36736	344.488	7.66666e-77	8.40302e-75
NUMBL	1.55696	4.53978	343.705	1.13479e-76	1.23898e-74
NECTIN3	-1.24666	6.06862	343.432	1.30122e-76	1.41522e-74
PKDCC	-1.52988	4.70767	343.337	1.36446e-76	1.47833e-74
FTH1	0.880539	12.0964	343.284	1.40091e-76	1.51202e-74
ATP10A	-1.37101	4.89532	342.414	2.16635e-76	2.32928e-74
PDE4DIP	1.69821	4.43874	341.736	3.04226e-76	3.25867e-74
DDAH1	2.08592	3.36291	341.453	3.50511e-76	3.74029e-74
PAX8-AS1	1.16726	6.08344	341.358	3.67563e-76	3.9075e-74
MYOSLID	2.43025	2.96389	341.183	4.0119e-76	4.24901e-74
SLC4A7	-1.12878	6.74293	340.492	5.66949e-76	5.98216e-74
CCL5	1.00606	8.9388	339.775	8.11842e-76	8.5343e-74
NCF1B	-2.01358	4.04921	337.858	2.12006e-75	2.22041e-73
ABCA13	-2.38548	3.00442	337.722	2.27031e-75	2.369e-73
PSMB9	-0.993896	9.34816	337.042	3.19109e-75	3.31756e-73
CAMKK2	-1.31158	5.28188	336.883	3.45545e-75	3.57924e-73
MYL12B	1.0401	7.70196	334.489	1.14583e-74	1.18254e-72
ZNF703	-1.51837	4.62616	334.16	1.3508e-74	1.38901e-72
DLL1	-2.68133	2.62517	333.651	1.7428e-74	1.78561e-72
CFL2	1.6413	4.27058	333.246	2.13492e-74	2.17946e-72
ALCAM	0.956851	9.97068	332.779	2.69712e-74	2.74349e-72
LINC01605	-3.02678	2.29547	331.943	4.09882e-74	4.15436e-72
ARHGAP5	1.88663	3.8919	330.512	8.39274e-74	8.47606e-72
TPRG1L	-1.43057	4.77733	329.596	1.32788e-73	1.33629e-71
ISG15	-1.02844	7.67463	329.066	1.73152e-73	1.73631e-71
TRPS1	-1.2298	5.83614	328.603	2.18373e-73	2.18203e-71
XYLT1	-1.09307	6.6286	328.012	2.93594e-73	2.92332e-71
GSDMD	-1.0507	7.50401	326.564	6.06301e-73	6.01578e-71
AREG	1.14448	6.60228	324.356	1.83132e-72	1.80781e-70
GYPC	-1.10162	6.5304	324.353	1.83479e-72	1.80781e-70
SERPINA1	1.27509	5.35882	323.386	2.97702e-72	2.92306e-70
PARP14	-0.976001	8.9974	322.97	3.66718e-72	3.58825e-70
H1-2	-1.13237	6.07364	322.956	3.69322e-72	3.60127e-70
GIMAP6	-1.50648	4.84233	321.29	8.50541e-72	8.26516e-70
APOBEC3F	-1.84911	3.84478	320.469	1.28321e-71	1.24269e-69
RASA1	-1.03579	7.3501	320.325	1.37889e-71	1.33079e-69
ARHGAP27	-1.01902	7.64108	320.259	1.42571e-71	1.3713e-69
LOC102723996	-1.28604	5.2546	318.938	2.76195e-71	2.64754e-69
SP110	-1.048	7.05908	318.697	3.11623e-71	2.97705e-69
ZC3H12D	-1.71283	3.71688	318.116	4.16969e-71	3.97005e-69
PPP1R3A	1.15764	6.1023	317.622	5.34153e-71	5.06871e-69
C3AR1	-1.54925	4.54497	316.077	1.15767e-70	1.09487e-68
STAB1	-3.10796	2.27108	315.775	1.3472e-70	1.26987e-68
CTSG	1.04912	6.96116	312.47	7.05004e-70	6.62329e-68
SERINC5	1.37522	4.78547	312.093	8.51904e-70	7.97687e-68
CX3CR1	-1.65488	3.98029	311.788	9.92292e-70	9.26073e-68
SAMD9L	-0.997582	7.90624	311.726	1.02372e-69	9.52262e-68
RPS6KA1	0.955906	9.0203	311.116	1.38929e-69	1.28808e-67
EXTL1	2.8572	2.41243	311.106	1.3964e-69	1.29044e-67
GPNMB	0.96175	8.47031	310.766	1.65599e-69	1.52534e-67
COL4A2	-1.21081	5.37217	310.044	2.37679e-69	2.18217e-67
TMEM184C	-1.00976	7.52477	309.009	3.99295e-69	3.65413e-67
FFAR2	-2.63567	2.17186	308.227	5.90749e-69	5.38877e-67
APOL6	-0.990857	8.15252	307.59	8.12725e-69	7.38979e-67
SQSTM1	0.941035	9.20718	305.555	2.25185e-68	2.04096e-66
HELZ2	-0.957231	8.50086	305.194	2.69867e-68	2.43811e-66
FGL2	1.29506	5.59524	304.887	3.14761e-68	2.83465e-66
MTHFD2L	-1.46011	4.80973	304.543	3.74015e-68	3.35758e-66
SPTBN5	-1.76666	3.84326	303.726	5.62992e-68	5.03807e-66
GOLGA8N	-1.18295	5.54294	303.002	8.09171e-68	7.21821e-66
GFI1	-1.39892	4.70101	302.862	8.67941e-68	7.71813e-66
VSIR	1.06482	6.74723	302.734	9.25603e-68	8.20508e-66
IFI35	-1.00587	7.51195	301.903	1.40328e-67	1.24007e-65
ITGA7	1.20363	5.50838	301.635	1.60533e-67	1.41419e-65
CDC20	-1.0331	6.66133	301.128	2.06954e-67	1.81747e-65
GOLGA8M	-1.50787	4.24926	301.067	2.13312e-67	1.8675e-65
IPCEF1	-1.10011	6.0674	300.304	3.12644e-67	2.72869e-65
IL4I1	-1.07768	6.64811	300.153	3.37303e-67	2.93485e-65
XRN1	-1.0453	6.96658	299.625	4.39293e-67	3.81053e-65
CARMIL3	3.03908	2.37877	299.307	5.1527e-67	4.4559e-65
OAS3	-0.92027	9.48281	297.941	1.02137e-66	8.80555e-65
TBX15	-1.29242	5.1711	297.867	1.06021e-66	9.11261e-65
IFNGR2	-0.94195	8.72406	297.225	1.46239e-66	1.25313e-64
PLSCR1	-0.971616	7.7456	295.909	2.8273e-66	2.41542e-64
ACSL1	0.972591	7.81735	294.784	4.9684e-66	4.23182e-64
PCDH11X	1.95308	3.43582	293.952	7.53656e-66	6.39997e-64
CCN4	3.94679	2.02248	293.477	9.56209e-66	8.09571e-64
ITK	3.53706	3.40328	291.895	2.11229e-65	1.78302e-63
SDC2	-0.896979	9.86309	291.222	2.959e-65	2.49031e-63
SH3RF1	-1.36419	4.81927	291.139	3.085e-65	2.58865e-63
OASL	-1.08675	6.14168	290.891	3.49271e-65	2.9221e-63
IL6R-AS1	2.22302	3.67787	290.461	4.33437e-65	3.61555e-63
BATF2	-1.40988	5.07383	290.452	4.35407e-65	3.6213e-63
ALOX5	-1.10256	5.83789	290.227	4.87165e-65	4.0399e-63
MGLL	0.956622	7.88235	289.393	7.39897e-65	6.11778e-63
CORO2B	1.3574	4.81945	289.281	7.8291e-65	6.45456e-63
LILRB3	1.26159	5.45728	288.925	9.3584e-65	7.69293e-63
TGM2	0.93503	8.82379	288.55	1.12899e-64	9.25382e-63
NES	0.941924	8.25419	287.427	1.98158e-64	1.61951e-62
MX1	-1.00496	6.82572	287.109	2.3238e-64	1.89373e-62
ARHGEF3	-1.13255	5.72306	286.701	2.85201e-64	2.3175e-62
ARID5B	-1.43346	4.94873	284.177	1.01029e-63	8.18597e-62
KLF9	1.07362	6.22963	282.006	2.99795e-63	2.42218e-61
LIPG	1.80259	3.59816	281.129	4.65276e-63	3.74845e-61
PARP10	-0.935878	7.92843	280.814	5.44918e-63	4.37761e-61
PTK7	1.34272	5.04427	280.642	5.93831e-63	4.75704e-61
SGMS2	1.77175	3.60742	280.619	6.00744e-63	4.79882e-61
RHPN1	-1.45096	4.38169	280.29	7.08561e-63	5.64414e-61
IGFBP4	-1.17243	5.4796	280.05	7.98891e-63	6.3458e-61
FGR	1.32386	4.69634	279.62	9.91409e-63	7.85296e-61
SLC9A1	0.997178	7.0058	279.514	1.04513e-62	8.25536e-61
G0S2	1.14099	5.41828	277.364	3.07027e-62	2.41841e-60
KCNG1	1.94714	3.31683	277.113	3.48221e-62	2.73528e-60
PLCXD1	1.01549	6.46681	276.122	5.72225e-62	4.48238e-60
ATP8B4	-1.03112	6.37903	275.782	6.78489e-62	5.30009e-60
B4GALT1	-0.973042	7.27439	275.534	7.6845e-62	5.98629e-60
PAQR5	0.966899	7.16063	274.966	1.02114e-61	7.93289e-60
HSPB3	-1.56511	4.1533	274.933	1.03839e-61	8.04484e-60
ABHD2	0.902547	8.63187	274.563	1.25012e-61	9.65871e-60
ITGA6	1.00648	6.66659	274.322	1.4102e-61	1.08659e-59
GBP3	-1.088	6.4527	273.677	1.94832e-61	1.49713e-59
GPR84	-1.30867	5.02066	272.883	2.90105e-61	2.2232e-59
LTA4H	1.08701	5.86893	271.178	6.81897e-61	5.21154e-59
TNFSF14	0.968914	6.82544	270.488	9.63773e-61	7.34597e-59
APBA2	1.03223	6.08753	268.991	2.04042e-60	1.55104e-58
A2M	-0.808772	11.3619	268.85	2.19019e-60	1.66043e-58
RMDN3	1.01629	6.32218	268.652	2.41857e-60	1.82867e-58
FCRLB	1.65202	3.65254	268.097	3.19463e-60	2.40901e-58
SNAI3	1.40458	4.53736	266.957	5.65783e-60	4.25511e-58
ATP6V1A	0.956206	7.1251	265.273	1.31544e-59	9.86688e-58
CEBPB	0.975254	6.84303	264.879	1.6029e-59	1.19912e-57
ADAP2	-1.3414	4.63028	264.835	1.63852e-59	1.22253e-57
DDIT4	-1.30427	4.68239	264.234	2.21488e-59	1.64822e-57
DEPP1	2.74925	2.29814	263.449	3.28285e-59	2.43654e-57
ZC3H12C	-0.975314	6.75346	262.934	4.24908e-59	3.14543e-57
NCF1C	-1.57469	4.34496	262.673	4.8443e-59	3.57669e-57
ETV7	-2.0727	4.61373	262.624	4.96437e-59	3.65579e-57
LILRB4	0.898741	8.25778	262.032	6.67864e-59	4.90542e-57
SAMD9	-0.927232	7.36399	261.901	7.13489e-59	5.22696e-57
COL27A1	-2.03254	3.17157	261.459	8.90167e-59	6.50443e-57
ATF5	-0.932799	7.50596	261.271	9.78104e-59	7.12857e-57
NCF1	-1.20389	5.50459	260.567	1.39259e-58	1.01233e-56
SLC31A2	-1.00369	7.02834	259.969	1.87882e-58	1.36229e-56
FADS1	1.01983	6.01368	259.895	1.94969e-58	1.41006e-56
SLC6A8	1.06072	5.88323	259.583	2.28039e-58	1.64502e-56
CCRL2	1.39679	4.52412	259.484	2.3957e-58	1.72381e-56
INHBB	4.5355	1.31666	259.087	2.92452e-58	2.09898e-56
GOLGA8J	-1.30856	4.5264	257.945	5.18369e-58	3.711e-56
IFITM3	-0.90133	7.9937	257.835	5.47667e-58	3.91084e-56
TBX21	2.51525	3.3748	257.789	5.60551e-58	3.99276e-56
SHFL	-1.0123	6.0228	257.248	7.35207e-58	5.22366e-56
LFNG	1.14272	5.42663	256.673	9.80598e-58	6.94971e-56
DIRAS2	-1.46715	4.21108	253.742	4.2633e-57	3.01394e-55
NFKBIA	-1.02706	6.29382	253.676	4.40812e-57	3.10855e-55
IRF7	-0.948966	6.79022	253.544	4.70849e-57	3.3121e-55
DIXDC1	1.473	4.28229	252.697	7.19893e-57	5.0514e-55
PTPRE	0.909318	7.64253	251.881	1.08427e-56	7.58938e-55
KDR	4.95829	1.166	251.641	1.22266e-56	8.53689e-55
IFITM2	-0.995132	6.31577	251.551	1.27878e-56	8.90674e-55
LTBP1	-1.52392	3.71427	251.175	1.54472e-56	1.07326e-54
CD226	1.62084	4.04786	251.145	1.56813e-56	1.08685e-54
ZNF516	-1.15064	5.15204	250.383	2.29777e-56	1.58866e-54
GBP5	-1.02597	8.59597	250.117	2.62524e-56	1.81065e-54
MARCKSL1	-1.01331	6.32299	249.936	2.87506e-56	1.97813e-54
CYP26B1	2.25912	2.77281	248.407	6.18775e-56	4.24702e-54
VASH1	0.921406	6.9318	248.06	7.36254e-56	5.04111e-54
KLF3	-0.985149	6.53456	247.913	7.92691e-56	5.41442e-54
RNF213	-0.843653	9.36513	247.907	7.95219e-56	5.41861e-54
TXNRD1	0.862444	8.41476	247.656	9.01588e-56	6.12863e-54
TSPAN5	1.35214	4.47974	247.165	1.15344e-55	7.82179e-54
MARCKS	-1.12424	5.09165	247.036	1.23096e-55	8.32756e-54
AKNA	-1.03596	5.76274	245.414	2.77524e-55	1.87299e-53
BST2	-0.864469	8.23962	245.402	2.79205e-55	1.87985e-53
QPCT	1.37813	4.21432	244.868	3.65001e-55	2.45166e-53
HMGN2	-0.881757	7.61058	244.59	4.19551e-55	2.81139e-53
LINC00504	0.96723	6.22331	244.212	5.07284e-55	3.39125e-53
LINC00622	1.98054	3.14881	243.733	6.4484e-55	4.30066e-53
ATP9A	0.942782	6.58284	243.574	6.98262e-55	4.64599e-53
PPBP	2.48641	2.70655	242.905	9.76654e-55	6.48306e-53
CYCS	0.909279	7.04152	242.356	1.28678e-54	8.52166e-53
PGGHG	-1.75319	3.33671	241.845	1.66252e-54	1.09843e-52
NREP	-0.897458	7.22648	241.342	2.13952e-54	1.41029e-52
CPNE6	3.00959	2.23269	241.229	2.26388e-54	1.48879e-52
ANKH	-0.989632	6.01969	240.067	4.05514e-54	2.66058e-52
MELTF	-0.921421	6.69904	239.738	4.78217e-54	3.13033e-52
MTMR9	0.998337	5.95571	239.436	5.56385e-54	3.63359e-52
RXFP1	-1.24529	5.54828	239.269	6.05124e-54	3.94278e-52
KPNA6	-1.08787	5.33304	238.61	8.4193e-54	5.47313e-52
SNTB1	-0.864729	8.00091	238.58	8.54667e-54	5.54318e-52
ANXA2P2	0.990386	5.97211	238.17	1.05015e-53	6.79544e-52
STXBP1	1.0628	5.46331	237.887	1.20986e-53	7.81105e-52
RGS1	-0.83587	8.68901	237.522	1.45321e-53	9.36077e-52
SLC2A4RG	-1.01884	5.60776	237.344	1.58881e-53	1.0211e-51
TSC22D1	0.790205	10.4115	236.952	1.93407e-53	1.24017e-51
TM6SF1	1.455	3.98855	236.639	2.26341e-53	1.44807e-51
RFTN1	0.896383	7.29386	235.623	3.767e-53	2.40459e-51
SLC6A12	2.03131	2.8947	234.245	7.52069e-53	4.78986e-51
OLFML2B	-2.74045	1.86938	234.193	7.7172e-53	4.90398e-51
HOMER2	-1.44395	3.9527	234.076	8.18449e-53	5.18926e-51
SNX9	0.852528	8.0181	233.709	9.83724e-53	6.22321e-51
FTL	0.698498	12.8196	233.565	1.05758e-52	6.67548e-51
CDK6	-0.864393	7.82284	233.279	1.2205e-52	7.68672e-51
PPFIBP1	-0.961979	6.19539	232.837	1.5235e-52	9.57364e-51
SVIL	-1.12412	5.10854	232.011	2.30575e-52	1.44572e-50
MTARC1	1.63431	3.48069	231.986	2.33445e-52	1.46047e-50
CYSLTR1	-1.02445	5.44761	231.976	2.34678e-52	1.46495e-50
GALM	-1.0005	5.7369	231.795	2.57031e-52	1.60095e-50
RIN2	-1.01158	5.64974	230.681	4.49312e-52	2.79245e-50
CLDN12	1.18837	4.90368	230.405	5.15935e-52	3.19627e-50
SREBF1	0.963778	6.1398	230.403	5.16548e-52	3.19627e-50
NCKAP1	0.960862	5.99171	230.092	6.03813e-52	3.72808e-50
TOR1B	-1.05185	5.34632	229.561	7.87952e-52	4.8544e-50
S100A16	0.957414	6.19919	229.433	8.4047e-52	5.1667e-50
ELP1	-1.11471	5.01547	229.154	9.66764e-52	5.93019e-50
EPB41L4B	2.35667	2.47815	228.997	1.046e-51	6.40232e-50
ATP2B4	0.823644	8.72517	228.846	1.12815e-51	6.89025e-50
PLA2G4A	-1.36113	4.35032	227.86	1.85013e-51	1.12754e-49
TAP1	-0.7129	12.1833	227.34	2.40098e-51	1.46011e-49
CD14	-0.950981	6.7868	227.287	2.46638e-51	1.49666e-49
GDF15	0.845399	7.61916	226.711	3.29301e-51	1.994e-49
LRP12	-0.852618	7.96466	226.257	4.13389e-51	2.49783e-49
SPHK1	0.879935	7.05738	225.806	5.18385e-51	3.12556e-49
CARNMT1	1.36571	4.09758	225.567	5.84489e-51	3.51664e-49
CD47	-0.923733	6.42269	225.315	6.63405e-51	3.98296e-49
TXN	0.8456	7.76273	225.26	6.81736e-51	4.08435e-49
YES1	1.01724	5.61972	225.128	7.28615e-51	4.35598e-49
PKM	0.740504	11.2473	224.902	8.15813e-51	4.86699e-49
CDC42	-0.855993	7.5313	224.549	9.74273e-51	5.8001e-49
CREB3L2	-0.948479	6.10828	224.209	1.15546e-50	6.86432e-49
BASP1	0.967764	5.93315	223.602	1.56628e-50	9.28536e-49
RBCK1	-0.884154	6.93212	223.269	1.85097e-50	1.09502e-48
PODXL	1.34052	4.08322	222.923	2.20222e-50	1.30009e-48
FSCN1	0.822798	8.23675	222.825	2.31354e-50	1.36296e-48
APOBEC3B	-1.36938	3.8096	221.09	5.5233e-50	3.24715e-48
ICAM1	-0.82943	8.54281	220.944	5.94531e-50	3.488e-48
ELK4	-0.940411	6.17651	220.602	7.05601e-50	4.13106e-48
SLFN5	-0.943327	6.21871	220.478	7.51116e-50	4.38844e-48
ATP6V1H	0.846457	7.41596	219.482	1.23797e-49	7.21801e-48
AGER	-1.11844	4.89952	219.42	1.27728e-49	7.43188e-48
DROSHA	-1.01618	5.38112	219.389	1.29714e-49	7.53196e-48
CHST11	0.801755	8.91939	219.138	1.47094e-49	8.5236e-48
HBEGF	0.826816	8.09566	218.876	1.67806e-49	9.70393e-48
LAMP3	-2.73476	2.21445	218.708	1.82563e-49	1.05357e-47
IL3RA	-1.31598	4.85631	217.937	2.68709e-49	1.54757e-47
SPATA13	1.48909	3.81396	217.881	2.76464e-49	1.58899e-47
ARL13B	-1.58001	3.55473	217.778	2.91056e-49	1.66947e-47
RPLP0P2	1.06184	5.22065	217.702	3.02422e-49	1.73115e-47
GOLGA8R	-1.2608	4.32841	217.336	3.63338e-49	2.07565e-47
ST8SIA5	-2.02732	2.96028	215.879	7.54725e-49	4.30285e-47
H2AZ1	-0.825545	7.6235	215.123	1.10303e-48	6.27597e-47
LOC105371763	1.20929	4.6994	215.116	1.10725e-48	6.28732e-47
STXBP5	0.867596	6.94925	214.757	1.32586e-48	7.51353e-47
MYO15B	-1.0408	5.25397	214.56	1.46306e-48	8.27449e-47
LOC100130992	-1.5991	3.57177	214.407	1.57989e-48	8.91739e-47
TCF4	-1.09448	4.91027	213.613	2.35382e-48	1.32592e-46
PPP1R16B	-1.37125	4.00153	213.238	2.84098e-48	1.59716e-46
ECRG4	2.37604	2.10273	212.044	5.17192e-48	2.90181e-46
CASS4	0.879624	6.9069	211.737	6.0333e-48	3.37841e-46
MTUS1	1.26012	4.21627	211.443	6.9947e-48	3.90901e-46
SEMA4D	-1.25043	4.38516	210.585	1.07575e-47	6.00004e-46
APLN	3.97729	1.03853	210.237	1.28106e-47	7.13109e-46
EMP1	-0.80337	8.09811	209.797	1.59777e-47	8.87654e-46
SNN	1.22331	4.25929	209.685	1.68957e-47	9.36816e-46
PTPRC	-0.787225	8.89962	209.584	1.77791e-47	9.83867e-46
GPX4	-0.849465	6.97348	209.271	2.08055e-47	1.1491e-45
CERCAM	-1.13005	4.74207	208.424	3.18172e-47	1.75385e-45
THBD	-0.780698	9.02386	208.206	3.55008e-47	1.9531e-45
SLC43A2	-0.94125	6.0429	207.948	4.04075e-47	2.21872e-45
IFIH1	-0.823953	7.45135	207.791	4.37272e-47	2.39635e-45
OXR1	-0.823967	7.67175	207.674	4.63707e-47	2.53631e-45
TRIM24	0.936243	5.79674	207.456	5.17305e-47	2.82401e-45
SLC2A3	1.00696	5.47426	207.364	5.41741e-47	2.9517e-45
SYT3	1.30353	4.20512	207.328	5.5177e-47	3.00057e-45
VIM	0.715645	11.0811	206.987	6.54723e-47	3.5536e-45
KCNK6	1.0722	4.97318	206.941	6.69825e-47	3.62861e-45
THUMPD1	-1.06616	5.01023	206.909	6.80793e-47	3.68097e-45
SMAP2	-0.767964	9.45575	206.675	7.65629e-47	4.13177e-45
TBC1D5	-0.919747	6.01954	206.349	9.01584e-47	4.85619e-45
PEX5L	-1.80148	3.33422	206.345	9.03315e-47	4.85626e-45
AIM2	-1.95637	4.67162	206.056	1.04476e-46	5.60604e-45
SMAD3	-1.66057	3.00429	205.907	1.12576e-46	6.02923e-45
DAPP1	-1.14533	4.83607	205.109	1.67987e-46	8.97984e-45
MAP3K9	2.96305	1.98793	205.052	1.72914e-46	9.22579e-45
TNPO1	0.776924	8.68755	204.848	1.91534e-46	1.02e-44
PYGL	0.900126	6.13999	203.754	3.31722e-46	1.76324e-44
TTL	0.863487	6.53786	203.604	3.57703e-46	1.89777e-44
KANK4	2.66783	1.83382	203.407	3.94854e-46	2.09095e-44
GOLGA8O	-1.09376	4.78698	203.318	4.12855e-46	2.18219e-44
VWF	1.41281	3.65191	202.915	5.05511e-46	2.66695e-44
DIRC3	1.69039	2.98248	202.607	5.89865e-46	3.10618e-44
TNFRSF21	0.81646	7.54821	202.572	6.00494e-46	3.15628e-44
ABCD1	0.824448	7.24	202.242	7.08589e-46	3.71753e-44
PPM1K	-1.17627	4.35571	202.235	7.11178e-46	3.7242e-44
CYP51A1	0.829854	7.11778	202.228	7.13589e-46	3.72992e-44
STING1	-0.973632	5.30475	200.753	1.49625e-45	7.80646e-44
ANTXR1	-0.941105	5.48239	200.747	1.50058e-45	7.81462e-44
IRS1	1.27618	4.20144	200.672	1.55826e-45	8.10007e-44
GNG11	-1.56429	3.15954	200.217	1.958e-45	1.01593e-43
HMGB2	-0.849046	6.43661	200.205	1.96995e-45	1.02026e-43
USP25	-0.95646	5.58838	199.92	2.27304e-45	1.17508e-43
SIPA1L1	-1.04101	5.40553	199.52	2.77859e-45	1.43381e-43
CENPF	-0.827302	6.73698	199.125	3.38834e-45	1.74527e-43
LINC02392	1.91397	2.52056	199.09	3.44848e-45	1.77302e-43
MYO7A	-1.63085	3.29618	198.648	4.30445e-45	2.2091e-43
PARP12	-0.886091	6.02144	198.345	5.01309e-45	2.56812e-43
PCOLCE2	-1.62954	3.20098	198.329	5.05342e-45	2.5841e-43
STAP1	-2.67205	1.60632	197.99	5.98922e-45	3.0571e-43
XKRX	1.18368	4.60731	197.974	6.03919e-45	3.07705e-43
SPTBN2	1.99146	2.29075	197.925	6.19015e-45	3.14829e-43
SLC25A23	0.889494	5.99754	197.876	6.34472e-45	3.22044e-43
BTG2	0.783705	8.22226	197.872	6.35477e-45	3.22044e-43
TANK	-0.903939	6.27677	197.412	8.00749e-45	4.05073e-43
COL8A2	2.08438	2.5019	197.316	8.40177e-45	4.2426e-43
TRNP1	2.92542	1.37696	196.216	1.45979e-44	7.35826e-43
KLHL29	2.56156	2.18028	195.914	1.69899e-44	8.54874e-43
KCNIP2	-2.436	2.24134	195.602	1.98659e-44	9.97812e-43
RCAN2	1.91385	3.03699	195.36	2.24404e-44	1.12512e-42
NFIL3	-0.898663	6.06452	195.284	2.33133e-44	1.16682e-42
AP1S1	0.860747	6.32018	195.262	2.35653e-44	1.17735e-42
OSTM1	0.790598	7.66338	195.142	2.5036e-44	1.24862e-42
JADE2	-1.06498	4.9046	194.905	2.81949e-44	1.40369e-42
RAB11FIP4	0.904399	5.91849	194.389	3.65318e-44	1.81555e-42
ATG9A	0.853131	6.42594	194.162	4.09451e-44	2.03131e-42
SORCS1	-1.12648	4.71443	193.835	4.82398e-44	2.38901e-42
GBE1	0.860851	6.27628	193.587	5.46548e-44	2.70197e-42
MSMO1	0.802353	7.36046	193.422	5.93734e-44	2.93012e-42
PI4K2A	0.79706	7.39511	193.348	6.16169e-44	3.03555e-42
TWIST1	-1.29144	4.02672	193.244	6.49148e-44	3.19245e-42
SYP	1.31214	4.07313	192.536	9.26302e-44	4.54756e-42
RASAL3	-1.01032	5.06534	192.019	1.20075e-43	5.88471e-42
ANOS1	1.12398	4.59431	191.356	1.6749e-43	8.19428e-42
MICALCL	1.74966	3.14299	190.989	2.0143e-43	9.83773e-42
HSH2D	-2.12749	1.98813	190.95	2.05449e-43	1.00167e-41
ALDH1A2	1.50956	3.46044	190.686	2.34565e-43	1.14166e-41
FGD2	-1.6417	3.45573	190.559	2.50047e-43	1.21492e-41
LINC01094	-1.342	4.30262	190.381	2.73368e-43	1.32595e-41
SDF2L1	0.954698	5.43646	190.207	2.98388e-43	1.44483e-41
BTG1	-0.759078	8.49499	190.005	3.30133e-43	1.59581e-41
TOP2A	-0.775261	7.5371	189.895	3.4897e-43	1.68399e-41
OLFML3	1.54732	3.39983	189.813	3.6363e-43	1.75174e-41
APOL1	-0.88154	6.79691	189.654	3.93909e-43	1.89438e-41
INPP4B	-1.09189	4.48604	189.323	4.65037e-43	2.23265e-41
DMBX1	2.90394	2.0562	189.086	5.23792e-43	2.51047e-41
BMP1	0.785705	7.43555	188.866	5.84964e-43	2.79892e-41
CTDNEP1	-0.913712	5.61644	188.852	5.89188e-43	2.81437e-41
THRA	1.01886	4.82379	188.749	6.20274e-43	2.95786e-41
ACO1	0.937079	5.49977	188.656	6.49951e-43	3.09416e-41
CPNE2	-0.796624	7.07751	188.472	7.12868e-43	3.38798e-41
PLA2G7	1.33878	3.79862	188.328	7.66387e-43	3.63404e-41
INHBE	3.0403	2.35532	188.326	7.67213e-43	3.63404e-41
SEMA7A	0.722117	9.78672	188.086	8.65443e-43	4.09247e-41
ATP6V1B2	0.7397	9.09419	188.081	8.67866e-43	4.09708e-41
HSPA5	0.705344	10.285	187.27	1.30383e-42	6.14495e-41
GRAMD4	-0.877086	5.9442	186.906	1.56517e-42	7.36437e-41
TSPOAP1	-1.12027	4.62964	186.611	1.81506e-42	8.52598e-41
CCN2	1.95495	2.99891	186.323	2.09753e-42	9.83646e-41
ATP1B3	0.753392	8.18667	185.881	2.61909e-42	1.2262e-40
SELPLG	-1.3353	4.21867	185.636	2.96314e-42	1.38499e-40
SPINT1	0.828758	6.58658	185.082	3.91203e-42	1.82549e-40
SLC38A3	4.00708	0.670301	184.04	6.60379e-42	3.07647e-40
SLC30A3	0.937071	5.36132	183.291	9.61884e-42	4.47371e-40
ICOSLG	-1.01229	4.92713	182.298	1.58381e-41	7.35418e-40
LOC100419583	-0.784805	7.44579	182.006	1.83484e-41	8.50584e-40
FGFRL1	-0.910537	5.65995	181.767	2.06823e-41	9.57206e-40
LGALS3	0.738971	8.32328	181.652	2.19201e-41	1.01284e-39
SP100	-0.768709	7.44016	181.555	2.30123e-41	1.06157e-39
TRIM54	1.018	4.9019	181.3	2.61493e-41	1.20432e-39
CARD16	-1.52345	3.50598	181.267	2.65838e-41	1.22234e-39
GLIS2	1.26536	4.01889	181.252	2.67903e-41	1.22983e-39
EPS15	-0.958384	5.20248	180.224	4.48961e-41	2.05765e-39
PMEPA1	2.18982	2.23823	180.066	4.86187e-41	2.22466e-39
OAS1	-0.760578	7.4658	179.669	5.93264e-41	2.71023e-39
TIAM2	1.70366	2.98538	178.813	9.12099e-41	4.16005e-39
UNC93B1	-0.777952	7.07342	178.628	1.00122e-40	4.55918e-39
CTSK	1.29276	3.7978	178.558	1.03682e-40	4.71368e-39
PNPT1	-0.777406	6.83022	178.328	1.1637e-40	5.28203e-39
NAMPT	0.791932	7.45783	178.29	1.18613e-40	5.37521e-39
PGBD5	0.806185	6.33387	177.864	1.46925e-40	6.64759e-39
YOD1	0.899382	5.52557	177.647	1.6387e-40	7.40241e-39
CD274	-1.64691	5.17794	177.531	1.73726e-40	7.83511e-39
EVC	0.819194	6.34436	177.473	1.78828e-40	8.05241e-39
CSK	-0.771139	7.28349	177.397	1.85774e-40	8.35188e-39
ARRDC3	-0.968146	5.27215	177.338	1.91379e-40	8.59017e-39
RAB8B	-0.809393	6.54163	177.328	1.92367e-40	8.62086e-39
IFI30	0.696137	9.92539	177.23	2.02027e-40	9.03944e-39
H1-0	-0.7519	7.60778	177.212	2.03923e-40	9.10985e-39
NBEAP1	-3.00622	1.22547	177.146	2.10818e-40	9.40304e-39
NPAS2	-1.35791	3.61834	176.925	2.35489e-40	1.04868e-38
EGR3	-1.25178	4.50474	176.706	2.62939e-40	1.16909e-38
LAMC2	1.80763	2.7014	176.474	2.9544e-40	1.31153e-38
NID1	-0.926598	5.22203	176.404	3.06068e-40	1.35658e-38
SETD7	0.813755	6.36628	175.637	4.49808e-40	1.99056e-38
PLEKHA3	-1.31418	3.77617	175.438	4.97221e-40	2.19694e-38
SLC38A2	0.745458	7.87489	175.339	5.22589e-40	2.30543e-38
SASH3	0.85798	5.76712	175.263	5.4294e-40	2.39147e-38
PPDPF	-0.870852	5.68165	175.176	5.67162e-40	2.49428e-38
MCEMP1	1.16938	4.36669	174.812	6.81027e-40	2.99038e-38
PTP4A3	-0.843152	6.23726	174.771	6.95164e-40	3.04773e-38
P2RY8	-0.84885	5.86156	174.675	7.29395e-40	3.19285e-38
EHBP1L1	-0.804592	6.6487	174.279	8.90132e-40	3.89044e-38
TRIM56	-0.819719	6.19458	173.843	1.10825e-39	4.83627e-38
SLC25A40	0.928019	5.22938	173.493	1.32109e-39	5.75619e-38
ST8SIA4	-0.893111	5.72831	173.434	1.36061e-39	5.91929e-38
GPR183	-1.11939	4.22998	173.403	1.38209e-39	6.00348e-38
LST1	0.761318	7.33307	173.378	1.39992e-39	6.07163e-38
TMEM62	-0.92899	5.21035	173.131	1.58477e-39	6.86282e-38
MCUB	-1.36042	3.74648	172.773	1.89711e-39	8.20284e-38
CHPF	0.816533	6.23852	172.727	1.9409e-39	8.37937e-38
NUMB	0.714714	8.75258	172.359	2.3354e-39	1.00671e-37
VPS33A	1.03551	4.73946	172.066	2.70651e-39	1.16491e-37
CLIP2	0.848205	5.91184	171.952	2.86516e-39	1.23132e-37
RCN3	-1.61963	2.9071	171.258	4.06141e-39	1.74277e-37
EFR3B	0.933099	5.11622	171.05	4.50917e-39	1.93198e-37
PARP9	-0.730215	7.88139	170.381	6.30979e-39	2.69937e-37
HLA-E	-0.649678	11.0401	170.04	7.48869e-39	3.19887e-37
SLC44A2	1.25028	4.09256	169.837	8.2958e-39	3.53829e-37
RGL1	-1.50179	3.43679	169.536	9.64944e-39	4.10944e-37
RRN3	-0.802831	6.26899	168.912	1.32005e-38	5.61327e-37
ZFP36L1	-0.716797	8.19098	168.718	1.45558e-38	6.18032e-37
MMP7	-0.788836	6.57491	168.535	1.59554e-38	6.76442e-37
EHD4	-0.756367	7.09133	168.49	1.6319e-38	6.90821e-37
MALAT1	-0.771445	6.98973	168.466	1.65218e-38	6.98362e-37
TRPM2	-0.804241	6.26401	167.746	2.37191e-38	1.00109e-36
NUP210	-0.739944	7.30902	167.732	2.38873e-38	1.00669e-36
SLC11A1	0.806194	6.65008	167.585	2.57147e-38	1.08208e-36
FBLIM1	-2.24775	2.22954	167.537	2.63431e-38	1.10688e-36
KIF2C	-0.864483	5.34471	167.52	2.65787e-38	1.11512e-36
LOC100128993	-3.66008	1.01969	167.131	3.23049e-38	1.35336e-36
LYPLAL1-AS1	-2.15462	2.1316	166.781	3.85279e-38	1.61168e-36
RET	-0.836045	5.77405	166.391	4.68673e-38	1.95763e-36
BIN1	-1.01202	4.68585	166.348	4.78975e-38	1.99771e-36
NPC1	0.736636	7.44081	166.121	5.36726e-38	2.23528e-36
BCL2L11	-0.992256	4.94118	166.089	5.45599e-38	2.26889e-36
IQGAP3	-0.804653	5.95132	165.902	5.99166e-38	2.48799e-36
DUSP3	0.739081	7.26898	165.52	7.26129e-38	3.01077e-36
TMEM215	1.31115	3.85769	165.297	8.12235e-38	3.36287e-36
IL13RA2	5.58497	0.344424	165.233	8.38924e-38	3.46829e-36
DAG1	0.734779	7.50488	165.162	8.69234e-38	3.58835e-36
APLP2	0.641576	10.9414	164.718	1.08654e-37	4.47888e-36
HTT	0.709871	8.11964	164.703	1.09469e-37	4.5059e-36
ANTXR2	-0.734995	7.43135	164.266	1.36369e-37	5.60502e-36
PDCD1LG2	-1.49039	3.91004	163.768	1.75133e-37	7.18782e-36
LGALS3BP	-0.74172	7.44532	163.762	1.75672e-37	7.19062e-36
CES1	0.735157	7.40784	163.762	1.7571e-37	7.19062e-36
BHLHE40	0.742965	7.1073	163.62	1.88657e-37	7.7093e-36
GALNT1	0.744638	7.09854	163.593	1.91267e-37	7.8047e-36
MYH14	0.867182	5.49902	163.483	2.02167e-37	8.23758e-36
ZBED1	-0.774617	6.60119	163.44	2.06602e-37	8.40616e-36
GLA	0.737118	7.28895	162.822	2.81814e-37	1.14499e-35
BEX1	0.875729	5.40421	162.578	3.18626e-37	1.2927e-35
UHMK1	0.715225	7.80352	162.187	3.8775e-37	1.57089e-35
EDNRA	-2.38058	1.41827	161.863	4.56484e-37	1.8467e-35
SLC1A2	2.31392	2.33176	161.811	4.68596e-37	1.89299e-35
EXD3	-1.68147	2.66283	161.451	5.61483e-37	2.265e-35
SCAMP1	-0.884798	5.31482	161.41	5.73097e-37	2.30855e-35
GMCL1	-1.0444	4.48615	161.353	5.89792e-37	2.37242e-35
GRK6	0.794171	6.13583	161.298	6.06248e-37	2.43515e-35
EGR2	0.731147	7.41701	161.102	6.68956e-37	2.68322e-35
LRP8	0.750509	6.90072	160.962	7.17752e-37	2.87487e-35
C2	-0.698139	9.33262	160.785	7.84703e-37	3.13859e-35
DYRK2	0.848862	5.54482	160.654	8.38049e-37	3.34722e-35
GPSM2	-0.845406	5.41831	160.46	9.2392e-37	3.68499e-35
ETS1	-0.713585	7.78672	160.114	1.09923e-36	4.37805e-35
SYT2	-1.97806	2.06277	160.025	1.14967e-36	4.57247e-35
WHAMMP2	-1.85461	2.09924	159.995	1.16754e-36	4.63702e-35
ZEB1	-0.846994	5.58426	159.982	1.17503e-36	4.66023e-35
MPRIP	-0.735109	7.08503	159.65	1.38859e-36	5.4995e-35
CNP	-0.713529	7.6127	159.319	1.63994e-36	6.4859e-35
LDLRAP1	0.8426	5.71741	159.268	1.6825e-36	6.64495e-35
RUNX1	-0.797776	6.36335	159.202	1.73949e-36	6.86042e-35
MAP3K20	-0.836267	5.71137	158.751	2.18217e-36	8.59433e-35
SLC38A5	-1.17543	3.97445	158.573	2.3864e-36	9.38563e-35
PRR5L	-1.44592	3.01297	158.529	2.43938e-36	9.58066e-35
RGMA	-1.89723	2.49523	158.28	2.76504e-36	1.08446e-34
RNF220	-0.891668	5.18662	158.204	2.87194e-36	1.12483e-34
RBM8A	0.782375	6.21184	158.066	3.07816e-36	1.20393e-34
GABRD	-2.80471	0.997805	157.996	3.18924e-36	1.24565e-34
RICTOR	-0.842527	5.63034	157.986	3.20571e-36	1.25036e-34
KLHL2	0.843822	5.62533	157.9	3.34583e-36	1.30321e-34
TKT	0.699728	7.91274	157.539	4.0132e-36	1.56101e-34
PDE7B	-2.32034	1.77252	157.454	4.18791e-36	1.62673e-34
IFITM10	0.836341	5.72614	157.428	4.24371e-36	1.64614e-34
UBE2Q2	-0.906577	5.11391	157.343	4.4277e-36	1.71516e-34
SEPTIN11	0.771975	6.17467	156.769	5.90993e-36	2.2862e-34
TMSB4X	-0.654246	9.87324	156.677	6.188e-36	2.39049e-34
TRPM8	-0.803575	5.7807	156.513	6.72011e-36	2.59251e-34
HSD3B7	0.803772	6.06932	156.206	7.8421e-36	3.02124e-34
VSTM4	-2.10176	1.66834	155.896	9.16429e-36	3.52582e-34
XAF1	-0.753047	6.56173	155.865	9.3094e-36	3.57678e-34
FER1L6	1.47816	3.12152	155.741	9.91083e-36	3.80269e-34
CERS4	0.929898	4.93642	155.732	9.95412e-36	3.81413e-34
SLC37A2	0.693736	7.98841	155.442	1.15143e-35	4.40598e-34
PDGFRA	1.31246	3.92859	155.297	1.23911e-35	4.73506e-34
SEMA3C	0.92547	5.12196	154.98	1.4531e-35	5.54532e-34
BCR	0.765526	6.44572	154.977	1.45506e-35	5.54532e-34
TNFSF9	1.40032	3.35656	154.288	2.05756e-35	7.83093e-34
TDRD9	2.82402	0.692083	154.006	2.3716e-35	9.01398e-34
PSAP	0.620393	10.9309	153.966	2.41916e-35	9.18241e-34
SYNE1	-1.2197	3.62518	153.93	2.46396e-35	9.33992e-34
SORT1	-0.741005	7.22499	153.753	2.69336e-35	1.01958e-33
AMPD2	0.708926	7.38357	153.602	2.90511e-35	1.09827e-33
SIGLEC16	-1.69709	2.78527	153.36	3.28116e-35	1.23878e-33
PDHX	0.876891	5.25019	153.336	3.32035e-35	1.2519e-33
OSBPL5	-1.26612	3.66092	153.312	3.36102e-35	1.26555e-33
PRNP	0.806476	5.82224	153.277	3.4218e-35	1.28673e-33
STK38L	-0.754668	6.91399	152.984	3.96473e-35	1.48891e-33
MEF2C-AS1	-2.18602	1.6492	152.89	4.15612e-35	1.55871e-33
SIGLEC1	-0.711997	7.31996	152.682	4.61434e-35	1.72827e-33
TEP1	-0.805546	5.89289	152.613	4.7782e-35	1.78727e-33
PINLYP	0.673023	8.62834	152.578	4.86143e-35	1.816e-33
SRPRB	0.782518	5.90642	152.478	5.11379e-35	1.90775e-33
BRCA2	-0.956846	4.57225	152.431	5.23611e-35	1.95081e-33
ANXA5	0.657452	9.39944	152.188	5.9145e-35	2.20066e-33
FFAR3	-5.93911	0.092541	152.004	6.49063e-35	2.41185e-33
GCLM	0.874916	5.39214	151.927	6.74612e-35	2.5035e-33
POLA1	-1.01861	4.31731	151.656	7.72975e-35	2.86477e-33
TUBB4A	1.8077	2.3058	150.777	1.20297e-34	4.45256e-33
PPARGC1A	-2.4	1.39385	150.732	1.23056e-34	4.54872e-33
TESC	-1.78683	2.12012	150.122	1.67207e-34	6.1727e-33
CALCOCO1	0.791402	6.09912	150.003	1.77533e-34	6.54533e-33
ITGA11	-1.12579	3.98341	149.987	1.78985e-34	6.59029e-33
THBS2	-1.94643	2.09027	149.912	1.85797e-34	6.83222e-33
RGMB	-1.601	2.52467	149.694	2.07418e-34	7.61735e-33
IGF1R	1.42513	3.18138	149.557	2.22165e-34	8.14835e-33
MOV10	-0.677041	8.20193	149.484	2.30498e-34	8.44303e-33
RGS14	0.776411	5.97408	149.448	2.34731e-34	8.58696e-33
SIGLEC11	-1.61015	2.99221	149.242	2.60314e-34	9.51053e-33
ABCG2	1.26065	3.29191	149.061	2.85137e-34	1.0404e-32
ANKRD44	-0.803871	5.85603	148.966	2.99048e-34	1.08975e-32
UBTD1	0.816722	5.57796	148.224	4.34374e-34	1.58085e-32
ZNF107	-1.00803	4.25299	148.162	4.4818e-34	1.629e-32
FKBP9	-0.876157	4.99618	148.098	4.62717e-34	1.67968e-32
DHRS3	-0.898171	5.09792	147.878	5.16841e-34	1.87375e-32
CCHCR1	-0.956896	4.60472	147.746	5.52482e-34	2.00039e-32
CLU	0.798875	5.62933	147.146	7.47034e-34	2.70136e-32
CMYA5	0.996085	4.80513	147.036	7.89556e-34	2.85148e-32
ANKFY1	-0.746758	6.35823	146.768	9.03507e-34	3.25885e-32
MREG	1.09921	4.15452	146.583	9.91417e-34	3.57138e-32
COMMD6	-0.851473	5.253	146.438	1.06671e-33	3.83772e-32
RFX8	-1.03369	4.38295	146.205	1.19909e-33	4.30849e-32
MYOF	0.67735	7.88666	145.839	1.44207e-33	5.17499e-32
ATXN1	0.907036	5.04326	145.694	1.55096e-33	5.55869e-32
SSH1	-0.798803	5.74679	145.544	1.67269e-33	5.9874e-32
HMGA1	0.623927	10.1516	145.474	1.7323e-33	6.19293e-32
ADCY8	0.713476	6.7983	145.031	2.16475e-33	7.72914e-32
R3HDM2	-0.959545	4.71697	144.458	2.88748e-33	1.02966e-31
NMI	-0.787899	5.99143	144.382	3.00066e-33	1.06867e-31
NIBAN2	0.618534	10.2637	144.235	3.23152e-33	1.14945e-31
APBB1IP	-0.748679	6.20865	144.186	3.31212e-33	1.17664e-31
ADGRB1	1.06791	4.07252	144.179	3.32324e-33	1.1791e-31
DGCR5	1.15337	3.5527	143.931	3.76539e-33	1.33431e-31
DST	0.770006	5.89355	143.681	4.26885e-33	1.51082e-31
FCGRT	-0.659975	8.26682	143.596	4.45643e-33	1.57524e-31
ELL2	0.696554	7.22274	143.544	4.57504e-33	1.61514e-31
MEAT6	2.89227	1.00459	143.451	4.79314e-33	1.69003e-31
SERPINH1	-0.705264	7.03318	143.406	4.90283e-33	1.72655e-31
LINC01000	-0.90112	4.89106	143.359	5.01993e-33	1.76559e-31
ATP1A1	0.618203	10.1655	143.26	5.27712e-33	1.85374e-31
BAG3	0.731844	6.44386	142.561	7.50112e-33	2.63172e-31
GNPNAT1	0.884929	4.88749	142.157	9.1893e-33	3.22001e-31
ATP1A2	2.05333	1.81525	142.097	9.47159e-33	3.31482e-31
KLF13	-0.659837	8.06413	141.963	1.01333e-32	3.54201e-31
ARL15	1.02137	4.23635	141.929	1.03098e-32	3.59926e-31
PLEK	0.620812	10.0312	141.898	1.04729e-32	3.65169e-31
BTN3A1	-0.957866	4.99711	141.877	1.05846e-32	3.6861e-31
TNRC6A	0.743691	6.19027	141.834	1.08115e-32	3.76049e-31
CD84	0.887313	5.06577	141.804	1.09792e-32	3.81413e-31
RHOBTB2	0.705217	6.68325	141.261	1.44299e-32	5.00675e-31
ATP6V1F	0.706244	6.74084	141.078	1.58219e-32	5.48299e-31
GJA1	-2.20926	1.77346	141.064	1.59295e-32	5.51353e-31
GGT1	-0.750191	5.98064	140.974	1.66668e-32	5.76164e-31
LILRA2	0.727243	6.24366	140.901	1.72943e-32	5.97128e-31
C1GALT1	-1.0282	4.28414	140.891	1.73776e-32	5.99274e-31
FCAR	0.693383	7.53028	140.772	1.84547e-32	6.35643e-31
CYP27A1	2.60503	0.600121	140.766	1.85038e-32	6.36559e-31
DHX58	-0.839717	5.18389	140.666	1.94584e-32	6.68583e-31
FANCD2	-0.828739	5.07221	140.576	2.03671e-32	6.98956e-31
GTPBP2	-0.690834	7.0612	140.48	2.13684e-32	7.32431e-31
CXorf21	-1.11455	3.9224	140.246	2.40455e-32	8.23195e-31
PLCB2	0.653966	8.14996	140.219	2.4369e-32	8.3326e-31
HS3ST3B1	0.769361	6.05284	140.003	2.71641e-32	9.27713e-31
PLK2	-1.58538	2.96026	139.78	3.03932e-32	1.03674e-30
RASGRF1	0.740907	6.00501	139.762	3.06692e-32	1.04489e-30
NTRK1	-2.41206	2.83943	139.721	3.13126e-32	1.06553e-30
CELSR1	-0.72064	6.3452	139.587	3.34914e-32	1.1383e-30
FAM102A	0.939309	4.60249	139.494	3.51068e-32	1.19178e-30
CRLF1	1.77069	2.25479	138.988	4.52764e-32	1.53516e-30
ZNF385A	0.705569	6.70344	138.659	5.34402e-32	1.8098e-30
GPD2	0.727721	6.17789	138.536	5.68506e-32	1.92299e-30
FRMD4B	-0.805596	5.37482	138.487	5.82701e-32	1.96865e-30
STXBP5-AS1	1.00542	4.44256	138.27	6.49752e-32	2.19257e-30
EXT1	0.976234	4.42298	138.151	6.89849e-32	2.3251e-30
PRSS22	2.10434	1.66043	138.055	7.24249e-32	2.43813e-30
ATP6AP1	0.63207	9.04088	137.999	7.44847e-32	2.50449e-30
ATP6V1E1	0.664003	7.66048	137.835	8.0908e-32	2.71724e-30
POP4	0.76446	5.82859	137.712	8.60561e-32	2.88671e-30
GNB4	-0.706439	6.44013	137.461	9.76579e-32	3.272e-30
ARHGAP31	0.730591	6.24236	137.421	9.96379e-32	3.33439e-30
CSDE1	0.593156	10.6469	137.41	1.0018e-31	3.34856e-30
UCN2	0.91324	4.6953	137.284	1.06725e-31	3.56314e-30
FCGR1A	-0.818631	6.16162	136.498	1.58585e-31	5.28827e-30
ASMTL-AS1	-1.16607	3.73207	136.473	1.60577e-31	5.34839e-30
NT5E	-0.629053	8.98854	136.347	1.7109e-31	5.69187e-30
HERC6	-0.718095	6.14095	136.306	1.7464e-31	5.80312e-30
DHRS9	-1.67896	2.70175	136.16	1.8799e-31	6.23942e-30
LOC100996724	1.41815	3.30147	135.834	2.21461e-31	7.3417e-30
IFI27	-0.766359	6.34696	135.815	2.23641e-31	7.40529e-30
DOK3	0.699274	6.53053	135.104	3.19838e-31	1.05782e-29
COTL1	-0.646667	8.02004	134.967	3.42654e-31	1.13196e-29
RBM43	-0.906061	4.56128	134.785	3.75475e-31	1.23893e-29
LINC01181	1.33514	3.51816	134.582	4.15881e-31	1.37066e-29
PTPN18	-0.913405	4.66159	134.483	4.37073e-31	1.43883e-29
DMP1	-2.4735	1.24787	134.385	4.59365e-31	1.51046e-29
LIMK1	0.661791	7.45284	133.773	6.2497e-31	2.0526e-29
GRASP	1.43551	3.05787	133.673	6.57347e-31	2.15643e-29
RGS20	1.30891	3.22699	133.578	6.89273e-31	2.25855e-29
PLCD3	1.24497	3.29249	133.417	7.47613e-31	2.44688e-29
CA11	0.968196	4.71343	133.231	8.20891e-31	2.6836e-29
UHRF1	-0.771825	5.40474	133.211	8.2919e-31	2.7076e-29
ABCB1	0.980099	4.68377	133.187	8.39255e-31	2.73731e-29
PCDH11Y	1.66155	2.47907	133.074	8.88415e-31	2.89431e-29
ACER2	1.39938	3.16133	132.91	9.65184e-31	3.14079e-29
NISCH	-0.710061	6.31154	132.492	1.19071e-30	3.87023e-29
CD63	0.605417	9.72352	132.247	1.34703e-30	4.37328e-29
MBOAT7	0.629702	8.45231	132.235	1.35568e-30	4.39632e-29
TMEM229B	-0.801634	5.46083	131.715	1.76128e-30	5.7051e-29
MIER2	0.784328	5.56659	131.701	1.77377e-30	5.73899e-29
PLEKHG2	-0.715123	6.31386	131.636	1.83264e-30	5.92267e-29
STEAP4	-4.49874	0.0822978	131.591	1.87472e-30	6.05176e-29
SERPIND1	2.2548	1.78349	131.353	2.11334e-30	6.81426e-29
FLVCR2	0.848813	5.03273	131.294	2.17638e-30	7.00953e-29
ACCS	-1.1538	3.60253	131.206	2.27566e-30	7.32095e-29
DNAJB11	0.671087	7.06144	131.107	2.3916e-30	7.6852e-29
C6orf223	1.08826	3.90094	131.083	2.4214e-30	7.77212e-29
GSR	0.714791	5.95306	131.026	2.49091e-30	7.98617e-29
PPL	2.04269	1.92367	131.019	2.49991e-30	8.00592e-29
ATMIN	-0.75159	5.77671	131.014	2.50647e-30	8.01785e-29
AVL9	0.728057	6.01579	130.969	2.56367e-30	8.19159e-29
GPR137B	0.825594	5.05904	130.693	2.94653e-30	9.40429e-29
MBNL1-AS1	-1.09835	3.8642	130.58	3.11861e-30	9.94229e-29
PCDHAC2	-1.49331	2.66235	130.502	3.24424e-30	1.03311e-28
ABCC6	-0.716597	6.37008	130.411	3.39492e-30	1.07988e-28
ABCB9	0.83896	4.96399	130.048	4.07734e-30	1.29549e-28
CD44	0.61434	9.00338	129.958	4.26459e-30	1.35347e-28
EMILIN2	-0.618432	8.80476	129.941	4.30119e-30	1.36355e-28
FGD5	2.33305	1.13773	129.901	4.39023e-30	1.39022e-28
PFKFB4	0.666207	7.0156	129.752	4.73267e-30	1.49699e-28
ARL5A	-0.792189	5.29779	129.69	4.88212e-30	1.54253e-28
HDAC3	-0.741989	5.83266	129.594	5.12456e-30	1.61733e-28
PDXDC1	0.618939	8.59739	129.342	5.81705e-30	1.83383e-28
MYO1G	-1.29988	3.16124	129.306	5.92365e-30	1.86535e-28
MYB	-1.46215	2.63137	129.272	6.02557e-30	1.89534e-28
TRIM25	-0.635162	7.77806	129.194	6.26797e-30	1.9694e-28
CHTF18	-0.950127	4.19127	129.099	6.57326e-30	2.06303e-28
RNF19A	-0.657648	7.2152	129.077	6.64756e-30	2.08403e-28
CREBRF	-0.947425	4.62777	128.838	7.49787e-30	2.348e-28
IRF8	-1.08598	4.01931	128.804	7.62692e-30	2.38577e-28
ASS1	0.78892	5.2458	128.523	8.78508e-30	2.74502e-28
HIF1A	-0.629806	8.15985	128.294	9.85982e-30	3.07744e-28
CDA	2.43088	1.4248	128.153	1.05844e-29	3.29996e-28
AOX1	1.89761	1.96494	128.019	1.13208e-29	3.52566e-28
ASPM	-0.709968	5.80394	127.894	1.20588e-29	3.75135e-28
FASN	0.612629	8.75985	127.865	1.22342e-29	3.80173e-28
MAP3K2	0.688981	6.46819	127.748	1.29777e-29	4.02837e-28
PSKH1	0.691553	6.33791	127.58	1.41278e-29	4.38055e-28
UST	-0.800593	5.13153	127.339	1.59491e-29	4.93986e-28
FARSA	0.669105	6.76976	127.223	1.69064e-29	5.23062e-28
ATXN10	0.656249	7.05104	127.107	1.79267e-29	5.54022e-28
ZNF385B	-4.04529	0.748915	126.987	1.90418e-29	5.87843e-28
TTC9	2.75629	1.29005	126.966	1.92426e-29	5.93393e-28
NRAP	-2.82234	1.20054	126.832	2.05875e-29	6.34177e-28
CHKA	0.865863	4.72941	126.782	2.11075e-29	6.49487e-28
PDE4B	-1.59917	2.97105	126.745	2.15101e-29	6.61156e-28
POLE4	0.810031	5.04036	126.343	2.63391e-29	8.08706e-28
ITGAL	-0.713981	6.39274	126.19	2.84407e-29	8.72285e-28
DUSP13	1.59093	2.40262	126.156	2.8934e-29	8.86081e-28
FAM53B	0.736592	5.75572	126.155	2.89532e-29	8.86081e-28
TBC1D2B	0.692118	6.36026	126.123	2.9422e-29	8.99456e-28
DDAH2	-0.707277	6.11285	126.024	3.09172e-29	9.44144e-28
RNF122	-1.28632	3.27927	125.87	3.34166e-29	1.01937e-27
TRIM5	-0.859331	4.57225	125.867	3.34638e-29	1.01971e-27
SCAMP4	-0.719887	5.89372	125.606	3.8177e-29	1.16208e-27
MFSD3	0.866288	4.68699	125.601	3.82593e-29	1.16333e-27
SLC16A2	0.918515	4.46819	125.49	4.0466e-29	1.22911e-27
SOX4	-0.752651	5.7573	125.48	4.06791e-29	1.23425e-27
P2RY2	1.0005	4.05782	125.399	4.23661e-29	1.28406e-27
FBN2	0.760925	5.45089	125.315	4.41946e-29	1.33805e-27
SLC44A5	-1.70213	2.05564	125.275	4.5095e-29	1.36385e-27
RTP4	-1.044	4.18666	125.17	4.75358e-29	1.43613e-27
CD4	-0.664903	6.79228	125.06	5.02515e-29	1.51655e-27
ADCY6	-1.09814	3.59104	125.027	5.10879e-29	1.54015e-27
ANXA1	0.61681	8.19018	124.827	5.65044e-29	1.70163e-27
PUS10	-0.947637	4.4509	124.761	5.84238e-29	1.75756e-27
MKI67	-0.642474	6.9882	124.734	5.92213e-29	1.77966e-27
ITGA2	-1.53073	2.47136	124.639	6.21169e-29	1.86469e-27
PLEKHF1	1.00816	4.25141	124.054	8.34137e-29	2.50135e-27
LMO4	0.630097	7.61849	123.902	9.00312e-29	2.69569e-27
CDS1	1.572	2.53327	123.901	9.00851e-29	2.69569e-27
LAP3	-0.614002	8.59392	123.826	9.35536e-29	2.79652e-27
PRXL2A	0.717432	5.88523	123.82	9.38311e-29	2.80185e-27
DENND2D	0.76015	5.18862	123.818	9.39323e-29	2.80192e-27
IFNAR2	-0.705566	6.21554	123.738	9.78064e-29	2.9144e-27
HEXIM1	0.731718	5.86331	123.684	1.00496e-28	2.99139e-27
SLC28A3	2.14003	1.7493	123.64	1.02743e-28	3.05507e-27
U2AF2	-0.65142	6.93092	123.595	1.05112e-28	3.12224e-27
UBASH3B	-0.967932	4.24515	123.42	1.14778e-28	3.40578e-27
ADAMTS7	-1.57968	2.3126	123.384	1.16904e-28	3.46521e-27
ITSN1	-0.784301	5.23801	123.337	1.19684e-28	3.54391e-27
LONP1	0.637492	7.26626	123.283	1.2298e-28	3.63768e-27
MRPL37	0.65251	6.84149	122.961	1.44617e-28	4.27321e-27
CCSAP	0.732021	5.52541	122.785	1.58066e-28	4.66576e-27
COX5B	0.617468	7.90828	122.626	1.71257e-28	5.04986e-27
MSH5-SAPCD1	-2.4336	1.1683	122.468	1.8545e-28	5.46267e-27
JCAD	-1.22435	3.16664	122.436	1.88403e-28	5.54388e-27
CD36	-0.621557	8.00409	122.346	1.97193e-28	5.79648e-27
SPIRE1	0.687649	6.11997	122.255	2.06405e-28	6.06097e-27
NSF	0.589294	9.40236	122.191	2.13201e-28	6.25404e-27
AVPI1	1.09586	3.95619	122.061	2.27664e-28	6.67137e-27
GEM	0.675202	6.64085	122.02	2.32381e-28	6.80255e-27
LITAF	0.656517	6.7339	122.016	2.32848e-28	6.80919e-27
SV2B	-1.3968	2.90066	121.985	2.36492e-28	6.90858e-27
MAST4	-1.02594	4.31582	121.91	2.45559e-28	7.16607e-27
NEDD9	-1.01794	4.027	121.863	2.51543e-28	7.33312e-27
EPOP	0.86379	5.02792	121.727	2.69292e-28	7.84246e-27
ATP13A3	0.586208	9.48696	121.699	2.73225e-28	7.94881e-27
ADAMTS14	-1.53259	2.25665	121.653	2.79579e-28	8.12531e-27
SESN2	1.12072	3.89716	121.4	3.17562e-28	9.21973e-27
HTR7	-1.64637	2.50147	121.073	3.74418e-28	1.08593e-26
GYG2	1.20951	3.17811	120.663	4.60465e-28	1.33412e-26
CHROMR	-1.04208	3.71132	120.48	5.04801e-28	1.46108e-26
SPATC1L	0.826029	4.80896	120.338	5.42371e-28	1.56822e-26
HAVCR2	-0.610481	7.98095	120.236	5.7077e-28	1.64749e-26
CIAO1	0.62604	7.38459	120.236	5.70953e-28	1.64749e-26
SORBS1	2.04342	2.08236	120.029	6.33526e-28	1.82618e-26
LRRC8B	0.830913	4.98052	119.973	6.51862e-28	1.87712e-26
ARC	1.44951	2.64378	119.921	6.68967e-28	1.92442e-26
STX3	0.676153	6.22269	119.835	6.98609e-28	2.00765e-26
FYB1	-1.04033	4.31969	119.827	7.01388e-28	2.01359e-26
GRID1	1.92418	2.02836	119.626	7.76265e-28	2.22629e-26
SLC19A2	0.949191	4.33381	119.555	8.04625e-28	2.30529e-26
PAN2	-0.998717	3.96591	118.862	1.1409e-27	3.26542e-26
CXorf38	-0.739745	5.52007	118.84	1.15354e-27	3.29825e-26
MDK	-1.73038	2.16614	118.704	1.23543e-27	3.52883e-26
SLC35F2	0.797666	5.03848	118.624	1.28611e-27	3.6699e-26
ARID3A	0.66941	6.4882	118.311	1.50547e-27	4.29151e-26
PGAM1	0.587581	8.84998	118.267	1.53956e-27	4.38427e-26
ERFE	-0.902663	4.19873	118.206	1.58754e-27	4.51636e-26
ATP6V0B	0.589634	8.71659	118.115	1.66216e-27	4.72386e-26
PHF19	-0.719522	5.46462	118.064	1.70525e-27	4.84148e-26
COL22A1	-0.671452	6.36593	117.842	1.90675e-27	5.40814e-26
PLK4	-0.929475	4.09204	117.753	1.99424e-27	5.6506e-26
HYOU1	0.602751	8.10662	117.743	2.0047e-27	5.67455e-26
CCDC92	-0.786092	5.11665	117.721	2.02671e-27	5.73113e-26
MSC	0.705573	5.95251	117.555	2.20443e-27	6.22746e-26
TSPAN14	0.660942	6.46222	117.455	2.31817e-27	6.54223e-26
GOLT1B	0.750812	5.39305	117.316	2.48643e-27	7.0101e-26
ATP6V0C	0.611356	7.58586	117.264	2.55227e-27	7.18854e-26
PCSK5	1.47463	2.88405	116.983	2.94057e-27	8.27398e-26
LRMP	-1.20207	3.29091	116.816	3.1989e-27	8.99191e-26
NT5C3A	-0.893874	4.47451	116.613	3.5425e-27	9.94784e-26
NOTCH1	-0.608767	7.68905	116.537	3.68148e-27	1.03279e-25
FEZ1	-1.96266	1.71623	116.474	3.80008e-27	1.065e-25
SPRY2	-0.589401	8.46952	116.274	4.20402e-27	1.17704e-25
JMJD1C	-0.608319	7.73016	116.262	4.22769e-27	1.1825e-25
ITM2A	-2.07409	1.44647	116.246	4.26314e-27	1.19124e-25
PROC	2.38417	1.09305	116.233	4.29019e-27	1.19761e-25
RIN3	0.786567	5.01488	116.115	4.55396e-27	1.26999e-25
CPOX	0.861765	4.53523	116.035	4.74012e-27	1.3206e-25
TMEM123	-0.587425	8.37987	115.998	4.83074e-27	1.34452e-25
IQGAP2	-0.816219	5.09311	115.886	5.11014e-27	1.42089e-25
EFR3A	0.605887	7.753	115.783	5.38383e-27	1.49552e-25
C5	-1.15958	3.27991	115.618	5.85027e-27	1.62349e-25
SPNS2	-0.692846	5.82497	115.46	6.33428e-27	1.75609e-25
ARL6IP5	-0.656998	6.4869	115.32	6.79741e-27	1.88264e-25
FADS2	0.691064	5.83224	115.114	7.54328e-27	2.08717e-25
MGAM	1.55229	2.99502	115.091	7.63045e-27	2.10923e-25
PRR11	-0.685497	5.66212	115.038	7.83604e-27	2.16394e-25
DNMT1	-0.62189	6.99629	114.955	8.16898e-27	2.25368e-25
SLC25A22	0.754233	5.37401	114.721	9.19557e-27	2.53443e-25
DBN1	0.612099	7.42791	114.437	1.06091e-26	2.92116e-25
NANOS1	2.05011	1.50228	114.377	1.09341e-26	3.00774e-25
MINDY2	0.663771	6.25727	114.29	1.14234e-26	3.13926e-25
RGS16	0.596309	7.95353	114.2	1.19559e-26	3.28241e-25
SFXN1	0.680152	5.83604	113.916	1.37978e-26	3.78442e-25
LOC606724	-0.898911	4.45708	113.864	1.41641e-26	3.88112e-25
SNX30	0.82308	4.54451	113.704	1.53505e-26	4.20214e-25
CBX1	-0.693638	5.69274	113.172	2.00753e-26	5.49024e-25
RAB3IL1	-1.13344	3.26328	113.164	2.01489e-26	5.50504e-25
CARD6	-0.819728	4.84814	113.076	2.10717e-26	5.75161e-25
CREM	-0.85277	5.1456	113.07	2.11283e-26	5.7615e-25
F2R	-1.79657	1.86557	113.025	2.16121e-26	5.88772e-25
EIF2AK2	-0.587483	7.96443	112.83	2.3847e-26	6.49032e-25
EIF4G1	0.565466	9.40772	112.793	2.42952e-26	6.60597e-25
RUBCN	-0.667159	6.06943	112.49	2.8313e-26	7.69101e-25
VANGL1	-0.675618	5.74607	112.317	3.08841e-26	8.38138e-25
KAT2B	-0.725967	5.46929	112.213	3.25522e-26	8.82561e-25
HDAC9	-0.657503	6.25899	112.193	3.2874e-26	8.90433e-25
MMP13	-8.48865	-0.450124	112.189	3.29471e-26	8.91558e-25
NCALD	-1.30286	2.93847	111.972	3.67621e-26	9.93298e-25
PHF2	-0.723173	5.41164	111.971	3.67771e-26	9.93298e-25
CRLF3	-0.931874	4.28162	111.516	4.62625e-26	1.24829e-24
LGR4	1.02622	3.75712	111.503	4.65483e-26	1.25481e-24
POLE	-0.745651	5.04716	111.428	4.83482e-26	1.30209e-24
VAT1	0.585204	7.85218	111.286	5.19347e-26	1.39734e-24
LILRB1	0.682603	5.93178	111.247	5.29585e-26	1.42354e-24
ESPL1	-0.963439	3.92858	111.229	5.34625e-26	1.43572e-24
ADCY7	-0.642085	6.29009	111.222	5.36322e-26	1.43891e-24
CTTN	0.646354	6.4379	110.963	6.11109e-26	1.638e-24
P3H1	-0.604215	7.33716	110.899	6.31294e-26	1.68951e-24
PPP2R1A	0.57629	8.30644	110.898	6.31521e-26	1.68951e-24
ADGRD1	-1.28948	2.92262	110.864	6.42681e-26	1.71774e-24
THSD7A	-0.695061	5.64165	110.754	6.79292e-26	1.81388e-24
RND3	-0.615996	7.0023	110.654	7.14299e-26	1.90556e-24
LY6G5B	-0.805838	4.73791	110.555	7.50739e-26	2.00089e-24
LIMD1	-0.667753	6.05524	110.421	8.03379e-26	2.13917e-24
CDC42EP3	-0.839895	4.41461	110.345	8.34668e-26	2.22039e-24
FCMR	0.6705	5.84999	110.248	8.76703e-26	2.33002e-24
TUBB4B	-0.56972	8.5883	110.118	9.35982e-26	2.48444e-24
PML	-0.610708	7.1507	110.117	9.36562e-26	2.48444e-24
FGD3	-0.822986	4.67424	110.086	9.51251e-26	2.52104e-24
LDLR	0.646595	6.46989	110.081	9.53577e-26	2.52484e-24
BDH1	1.02441	3.6781	109.924	1.03192e-25	2.7297e-24
UBE2L6	-0.608702	7.27676	109.84	1.0766e-25	2.84525e-24
LYSMD2	-1.00762	3.70467	109.766	1.11772e-25	2.95115e-24
GFPT2	1.31526	3.22223	109.671	1.17268e-25	3.09338e-24
KBTBD11	0.656706	6.10491	109.665	1.17633e-25	3.10011e-24
NRM	-0.77099	4.80461	109.653	1.18351e-25	3.11613e-24
RHEX	-2.49195	1.10939	109.603	1.21332e-25	3.19166e-24
GTSE1	-0.811243	4.48208	109.562	1.23901e-25	3.25619e-24
EVI2A	-0.618151	6.947	109.518	1.26655e-25	3.3255e-24
CMIP	-0.692426	5.80373	109.505	1.27522e-25	3.34516e-24
PPARGC1B	0.671522	5.94361	109.419	1.33163e-25	3.48988e-24
CCNB1	-0.653235	5.8543	109.403	1.3422e-25	3.51432e-24
LOC100506585	1.14264	3.11179	109.146	1.52794e-25	3.99695e-24
PRMT2	-0.672908	5.90995	109.104	1.56097e-25	4.07959e-24
NRIR	-1.81899	1.98032	108.677	1.93561e-25	5.05403e-24
OVCH1-AS1	5.04291	-0.10603	108.664	1.94843e-25	5.08281e-24
SERPINB2	1.87278	2.0206	108.478	2.1401e-25	5.57767e-24
DDR1	0.925507	4.16703	108.368	2.26207e-25	5.89014e-24
WDFY4	0.564134	8.77154	108.304	2.33573e-25	6.07634e-24
TMEM189	0.674723	5.84027	108.261	2.38742e-25	6.20509e-24
MACF1	-0.595931	7.32586	108.01	2.70992e-25	7.03683e-24
SECISBP2	0.716271	5.38428	107.991	2.73579e-25	7.09749e-24
SP140L	-0.711414	5.45828	107.753	3.084e-25	7.99352e-24
PRR16	-0.766927	5.02689	107.525	3.46106e-25	8.96263e-24
TPM4	-0.542497	9.85083	107.444	3.6055e-25	9.32812e-24
TMEM167A	0.608772	6.89211	107.41	3.66619e-25	9.47646e-24
MAP3K4	0.626976	6.50362	107.384	3.71602e-25	9.59649e-24
COQ10B	0.687278	5.77083	107.357	3.76648e-25	9.71793e-24
RAB3B	2.65842	0.860012	107.314	3.8483e-25	9.91998e-24
MTSS2	-0.804948	4.67363	107.262	3.95041e-25	1.01691e-23
NAPRT	-0.587802	7.54873	107.262	3.95213e-25	1.01691e-23
LTBP2	0.600111	7.11279	106.923	4.68737e-25	1.20499e-23
BMP2K	-0.619377	6.92635	106.811	4.96032e-25	1.27401e-23
IRF2	-0.670707	5.96264	106.786	5.02351e-25	1.28906e-23
CNTRL	-0.768672	4.88031	106.676	5.31051e-25	1.36147e-23
SLC29A1	0.614815	6.58645	106.61	5.49078e-25	1.40642e-23
GAS7	-0.640897	6.23087	106.567	5.61046e-25	1.43577e-23
XDH	4.20934	0.219411	106.391	6.13003e-25	1.56731e-23
SEC23A	0.685954	5.72734	106.319	6.35769e-25	1.62405e-23
FAM72A	-0.746407	4.95241	106.258	6.55508e-25	1.67297e-23
NCLN	0.60331	6.94134	106.159	6.89326e-25	1.75769e-23
IRF2BPL	-0.670006	5.8406	106.137	6.97004e-25	1.77566e-23
TGFB3	-1.06926	4.01045	106.092	7.12887e-25	1.81449e-23
CA2	-0.6241	6.58244	106.074	7.19437e-25	1.82952e-23
KIFC1	-0.581447	7.33212	106.01	7.42952e-25	1.88758e-23
ELOVL5	0.559827	8.59003	106.008	7.43606e-25	1.88758e-23
FNIP2	0.576348	7.77891	105.956	7.63543e-25	1.93645e-23
ACO2	0.575763	7.81019	105.91	7.81414e-25	1.98e-23
PDP2	0.743444	5.10724	105.687	8.74647e-25	2.21426e-23
RB1	-0.57915	7.61531	105.454	9.83376e-25	2.48729e-23
TTC39B	-0.669738	6.15415	105.396	1.01272e-24	2.55922e-23
PLS1	1.22559	3.12273	105.333	1.04553e-24	2.63978e-23
NCDN	0.70759	5.24491	105.26	1.0846e-24	2.73597e-23
LGALS9	-0.556408	8.75003	105.206	1.11472e-24	2.80946e-23
WDR90	-0.823671	4.43351	105.2	1.11774e-24	2.81454e-23
SCAMP5	-0.894395	4.29273	105.19	1.12334e-24	2.82615e-23
PSMB5	0.604409	6.89634	105.011	1.22948e-24	3.09041e-23
ANKRD52	0.574122	7.74003	104.971	1.25474e-24	3.15111e-23
GALNT9	2.55667	0.913424	104.843	1.33846e-24	3.35839e-23
PHF24	2.31678	1.08305	104.809	1.36172e-24	3.41371e-23
IFIT5	-0.704191	5.35292	104.701	1.43824e-24	3.60234e-23
FAIM	1.01839	3.56684	104.691	1.44488e-24	3.61577e-23
LRIG1	0.918833	4.14155	104.541	1.55894e-24	3.89776e-23
S100A11	0.545323	9.38346	104.532	1.56554e-24	3.91082e-23
GABRA4	-2.42501	0.839731	104.427	1.65106e-24	4.1208e-23
RGS3	-0.737484	5.11904	104.416	1.66037e-24	4.13685e-23
C4orf33	-1.02799	3.5301	104.416	1.66042e-24	4.13685e-23
S100A8	1.98107	4.04754	104.39	1.6819e-24	4.1867e-23
MAN1C1	0.759251	4.91501	104.367	1.70164e-24	4.23211e-23
IL1R1	-0.760302	4.7443	104.353	1.71418e-24	4.25955e-23
PRAME	-0.603089	6.87766	104.247	1.80831e-24	4.48951e-23
SGSH	-0.679058	5.67022	104.191	1.85949e-24	4.61252e-23
KCNQ3	-1.30778	2.94061	104.185	1.86571e-24	4.62388e-23
KRT80	2.3563	0.951927	104.101	1.94637e-24	4.81958e-23
SPTY2D1	0.750151	5.04141	103.917	2.13567e-24	5.28367e-23
ACVR1C	1.12426	3.4471	103.734	2.34177e-24	5.78851e-23
LZTS1	-0.968891	4.18832	103.663	2.4274e-24	5.99494e-23
ALDH9A1	0.624389	6.26602	103.277	2.94948e-24	7.27795e-23
FLT3	-1.905	1.76396	103.204	3.06041e-24	7.54509e-23
AHSA2P	-0.879294	4.21939	103.125	3.18381e-24	7.84249e-23
CIT	-0.820779	4.29899	103.041	3.32237e-24	8.17667e-23
FAM98A	0.650745	5.81651	102.97	3.444e-24	8.46865e-23
FMN1	1.19084	2.94686	102.944	3.48809e-24	8.5696e-23
GBP2	-0.930155	6.9019	102.861	3.63739e-24	8.92866e-23
TXN2	-0.647849	5.95689	102.658	4.03019e-24	9.88429e-23
LRRFIP2	-0.744123	5.02229	102.439	4.50178e-24	1.10313e-22
FAM225A	-0.652406	6.55858	102.26	4.9279e-24	1.2065e-22
PLIN3	0.564835	7.95368	102.194	5.09371e-24	1.24602e-22
PFDN6	0.579267	7.4501	102.16	5.18093e-24	1.26626e-22
CLSTN3	-0.692158	5.60409	102.072	5.41668e-24	1.32274e-22
FAM91A1	-0.579982	7.31368	102.063	5.44071e-24	1.32746e-22
TMEM151B	2.25789	1.11264	101.692	6.5614e-24	1.59951e-22
CELF2	-0.577424	7.2782	101.592	6.90297e-24	1.68133e-22
TBX2	-1.13241	3.14267	101.524	7.14354e-24	1.73843e-22
SYNE3	-0.762523	4.76327	101.514	7.17982e-24	1.74575e-22
CANX	0.519771	10.1701	101.449	7.41665e-24	1.80179e-22
PLSCR4	-2.67884	1.22902	101.427	7.50173e-24	1.82089e-22
RAB39A	-1.21034	3.21821	101.258	8.16995e-24	1.98139e-22
AGRN	-0.545879	8.59677	101.255	8.17965e-24	1.98204e-22
GIMAP2	-0.859419	4.52784	100.891	9.83061e-24	2.38005e-22
MYO1F	0.543264	8.85965	100.888	9.84569e-24	2.38166e-22
ERO1B	0.777154	4.91713	100.856	1.00052e-23	2.41817e-22
IRAK2	-1.1207	3.37641	100.808	1.02524e-23	2.47581e-22
EPG5	0.676374	5.61804	100.688	1.08907e-23	2.6277e-22
PHLPP1	-0.720607	5.22535	100.676	1.09592e-23	2.64198e-22
SLC9A6	0.724816	5.05484	100.475	1.21288e-23	2.92145e-22
GLO1	0.549192	8.23799	100.428	1.24208e-23	2.98923e-22
BMP8B	-0.63926	5.82563	100.419	1.24723e-23	2.99908e-22
FITM2	1.07813	3.24039	100.381	1.27192e-23	3.05584e-22
KIF21A	0.886645	4.13237	99.9454	1.58432e-23	3.80317e-22
DIRAS1	0.743553	4.9084	99.8983	1.62239e-23	3.89127e-22
SELENOI	0.624696	6.21712	99.814	1.69293e-23	4.057e-22
DPP4	1.03764	3.47256	99.5411	1.94291e-23	4.65213e-22
MYO7B	2.47383	0.715967	99.5243	1.95943e-23	4.68771e-22
HACD4	-0.678111	5.45179	99.5047	1.97894e-23	4.73039e-22
PDLIM4	0.638882	6.08767	99.4566	2.02754e-23	4.84248e-22
ARPC1A	0.661693	5.59393	99.3099	2.18338e-23	5.21027e-22
KLF11	-0.830921	4.33034	99.2926	2.20258e-23	5.25165e-22
GOLGA7	0.581795	7.02657	99.2824	2.21387e-23	5.27413e-22
PIK3AP1	0.585628	6.79522	99.2207	2.28399e-23	5.4366e-22
APOBEC3D	-2.32299	0.848315	99.1366	2.38291e-23	5.66728e-22
YRDC	0.726839	5.04195	99.1037	2.42292e-23	5.75759e-22
TGFBR1	0.570842	7.05474	98.9038	2.68014e-23	6.36347e-22
SYN3	1.61985	1.87732	98.8361	2.7733e-23	6.57914e-22
PRXL2B	0.829119	4.25507	98.7985	2.82633e-23	6.69933e-22
USP46	0.818557	4.43689	98.7059	2.96161e-23	7.01411e-22
CLIC1	-0.475803	11.831	98.6994	2.9714e-23	7.0314e-22
TGFB1I1	-0.993132	3.71131	98.6366	3.06703e-23	7.25162e-22
PNPLA3	0.931149	3.84207	98.6132	3.10357e-23	7.33189e-22
EPS8	0.698523	5.23763	98.4363	3.39332e-23	8.0097e-22
SLC4A4	-2.09583	1.13449	98.3122	3.61276e-23	8.52056e-22
SFI1	-0.907919	3.89825	98.2821	3.66808e-23	8.64383e-22
TCF12	-0.557413	7.74161	98.0752	4.07181e-23	9.58724e-22
ARFIP2	0.728034	4.99431	98.021	4.18485e-23	9.84518e-22
FIG4	0.599459	6.64863	98.0112	4.20546e-23	9.88545e-22
RNA45SN3	-0.886766	3.95233	97.9407	4.35798e-23	1.02355e-21
PRTN3	0.583658	6.88557	97.8764	4.50154e-23	1.05639e-21
ENTPD6	-0.587305	6.76924	97.5955	5.18753e-23	1.21636e-21
SEMA4C	-0.699677	5.43679	97.5926	5.19516e-23	1.21714e-21
PIM1	0.664692	5.82331	97.5867	5.21057e-23	1.21974e-21
LNPEP	-0.590059	6.64634	97.5622	5.27546e-23	1.23391e-21
SPARC	1.25394	2.73588	97.555	5.29459e-23	1.23736e-21
LCP2	-0.587727	6.92479	97.5421	5.32919e-23	1.24442e-21
CMKLR1	-1.25581	2.96881	97.5395	5.3363e-23	1.24505e-21
KLHDC10	0.663896	5.50579	97.2201	6.26967e-23	1.46161e-21
NCAPG	-0.614919	5.87145	97.2121	6.29518e-23	1.46635e-21
CCDC170	-1.91396	1.47234	97.0858	6.70961e-23	1.5616e-21
DANCR	1.02565	3.36158	96.9819	7.07081e-23	1.64431e-21
SLCO2B1	-0.581018	6.8365	96.8298	7.63523e-23	1.77411e-21
KLF6	-0.565618	7.28815	96.7837	7.8153e-23	1.81446e-21
PPP2R5D	0.574671	6.98217	96.7643	7.89222e-23	1.83081e-21
XPOT	0.611982	6.04637	96.7506	7.94698e-23	1.84201e-21
MAMDC4	-1.44774	2.20309	96.6998	8.15338e-23	1.8883e-21
LINC01145	-1.21063	2.83254	96.6207	8.48523e-23	1.96355e-21
SNHG16	0.678346	5.27943	96.6157	8.50689e-23	1.96695e-21
TCAF1	-0.882856	4.01397	96.5378	8.84822e-23	2.0442e-21
SLC27A3	0.65066	5.86166	96.5321	8.87354e-23	2.04838e-21
ACKR3	0.93744	4.25208	96.5292	8.8867e-23	2.04974e-21
RNA45SN2	-0.892626	3.90213	96.3875	9.54549e-23	2.1999e-21
ZNF366	0.828501	4.3448	96.3525	9.71578e-23	2.23732e-21
KIFBP	-0.840474	4.2686	96.1785	1.06081e-22	2.4408e-21
NUFIP2	0.551696	7.66302	96.015	1.15209e-22	2.64869e-21
MGP	-2.87357	0.337945	95.9813	1.17187e-22	2.69197e-21
RAD54L	-0.840053	4.03444	95.8031	1.28216e-22	2.94294e-21
TRPM4	-0.671295	5.53067	95.7878	1.29209e-22	2.96333e-21
DENND6A	0.682805	5.24138	95.5519	1.45558e-22	3.33557e-21
PDIA6	0.523154	9.21239	95.4647	1.5211e-22	3.48289e-21
ATP5F1B	0.521945	9.23073	95.3335	1.62528e-22	3.71842e-21
ZBTB7C	0.998031	3.5118	95.255	1.69097e-22	3.86558e-21
MAX	-0.660369	5.59764	95.2015	1.73726e-22	3.96819e-21
PRC1	-0.591799	6.14804	95.0576	1.86819e-22	4.26382e-21
SLC48A1	0.808354	4.35906	94.9797	1.9431e-22	4.43121e-21
SC5D	0.64005	5.67023	94.9551	1.96747e-22	4.48316e-21
KCNMA1	-1.2843	2.47023	94.8156	2.11102e-22	4.8064e-21
FANCA	-0.66034	5.28101	94.6316	2.31652e-22	5.27004e-21
MFSD6	0.625803	5.80872	94.6137	2.33755e-22	5.31361e-21
PEA15	0.525868	8.74943	94.5372	2.42966e-22	5.51856e-21
MAP3K5	-0.686526	5.15655	94.285	2.7597e-22	6.26316e-21
XBP1	0.62	6.02027	94.1594	2.9404e-22	6.6679e-21
TTLL12	0.597959	6.19573	94.1348	2.97707e-22	6.74563e-21
FAM225B	-0.634591	6.41019	94.097	3.03457e-22	6.87042e-21
ZNF331	-1.44299	1.89341	94.0876	3.04887e-22	6.89728e-21
PDIK1L	1.08094	3.18533	94.0838	3.05486e-22	6.9053e-21
LOC101928143	0.90837	3.95777	94.0504	3.10669e-22	7.01686e-21
NR3C1	-0.547746	7.68089	93.9998	3.18719e-22	7.19292e-21
JPH1	1.59599	1.85196	93.994	3.19644e-22	7.20805e-21
UBE2E3	-0.655617	5.42381	93.9706	3.23457e-22	7.28823e-21
CYTH1	-0.601177	6.1943	93.9488	3.27035e-22	7.36298e-21
GIMAP8	-0.94114	4.95295	93.9245	3.31068e-22	7.44785e-21
PARP15	-1.58644	1.81903	93.8523	3.43368e-22	7.71841e-21
GOLGA8H	-1.29401	2.52077	93.7726	3.57469e-22	8.029e-21
FADS3	0.672182	5.40543	93.6038	3.89279e-22	8.73654e-21
HES2	3.69908	-0.136241	93.5776	3.94454e-22	8.84566e-21
RERE	-0.761882	4.74573	93.4822	4.13933e-22	9.27513e-21
GLIPR1	0.55227	7.46075	93.3793	4.36003e-22	9.76191e-21
EHMT1	-0.616031	5.97307	93.3226	4.48683e-22	1.00379e-20
MYLIP	1.00454	3.61644	93.1889	4.80025e-22	1.07305e-20
CRYBB1	-0.921447	3.88675	93.1866	4.80589e-22	1.07347e-20
LINC00869	-0.804809	4.51542	93.1603	4.87012e-22	1.08695e-20
RUNX3	-0.567443	6.9611	93.1281	4.94984e-22	1.10388e-20
CXCL5	3.60379	0.508588	93.0991	5.02282e-22	1.11927e-20
NR4A3	-0.764109	4.85385	93.0659	5.10778e-22	1.1373e-20
PTDSS2	0.641638	5.52186	93.0236	5.21827e-22	1.16099e-20
CAMSAP2	0.57376	6.75715	92.9464	5.4255e-22	1.20615e-20
ITGA3	0.536176	7.94832	92.8835	5.60085e-22	1.24415e-20
BTN3A2	-0.659181	5.69624	92.841	5.72236e-22	1.27015e-20
MED28	-0.583919	6.47091	92.8267	5.7639e-22	1.27837e-20
DEPDC1B	-0.821922	4.15513	92.736	6.03379e-22	1.33717e-20
CNDP2	-0.546729	7.69455	92.7165	6.09367e-22	1.34939e-20
ACSL3	0.547272	7.5069	92.6142	6.41664e-22	1.41979e-20
AZU1	0.536409	7.92042	92.5971	6.47233e-22	1.431e-20
PDIA3	0.507883	9.65607	92.5811	6.52511e-22	1.44154e-20
SYTL3	-0.682642	5.55646	92.4174	7.08738e-22	1.56454e-20
RAB6B	0.682848	5.14727	92.4031	7.1387e-22	1.57464e-20
GOLGA8T	-1.33483	2.2376	92.3946	7.16961e-22	1.58022e-20
VAC14	0.58035	6.54007	92.3835	7.20986e-22	1.58785e-20
MYO1E	-0.521602	8.71621	92.3662	7.27293e-22	1.6005e-20
RASSF3	-0.80636	4.42768	92.3037	7.50617e-22	1.65054e-20
VDAC1	0.52587	8.26561	92.193	7.93788e-22	1.74411e-20
ATP5F1A	0.512742	9.24929	92.1051	8.29851e-22	1.82194e-20
FES	-0.819479	4.39298	92.0088	8.71207e-22	1.91125e-20
SYT7	1.0703	3.28684	91.8019	9.67169e-22	2.12012e-20
SLC9A7P1	0.986799	3.75254	91.7495	9.93129e-22	2.17535e-20
NLRP3	-0.590728	6.5412	91.7132	1.01149e-21	2.21384e-20
HBS1L	0.564464	6.78603	91.6917	1.02257e-21	2.23636e-20
ACACA	0.551757	7.13024	91.6676	1.0351e-21	2.26201e-20
METTL9	0.569705	6.70167	91.6618	1.03812e-21	2.26687e-20
SP3	-0.561997	6.99233	91.4139	1.17661e-21	2.56729e-20
FBLN1	-2.40552	0.506055	91.3853	1.1937e-21	2.60184e-20
ALG3	0.616543	5.69599	91.3844	1.19428e-21	2.60184e-20
BTBD7	-0.595152	6.16018	91.3248	1.23077e-21	2.67927e-20
GPRIN1	0.734144	4.83603	91.2837	1.25659e-21	2.73337e-20
CSTB	0.526265	8.08563	91.2005	1.31051e-21	2.84846e-20
MAP4K4	-0.51886	8.59197	90.9603	1.47959e-21	3.21351e-20
PDCD6IP	0.53663	7.68579	90.8179	1.58994e-21	3.45052e-20
STIL	-0.747379	4.48474	90.7666	1.63173e-21	3.53851e-20
EEPD1	-0.623155	5.7182	90.6799	1.70474e-21	3.694e-20
METRNL	-0.534339	7.82302	90.6684	1.71466e-21	3.71266e-20
LOC102724814	-0.942556	3.74795	90.6487	1.73188e-21	3.74706e-20
RIN1	-0.805821	4.3877	90.5708	1.80131e-21	3.89431e-20
JUP	0.593317	6.17574	90.4189	1.945e-21	4.20173e-20
OGT	-0.565473	6.71764	90.3706	1.99305e-21	4.30226e-20
PHACTR3	-1.23074	2.49873	90.3203	2.04435e-21	4.40962e-20
HR	2.25349	0.692739	90.2654	2.1019e-21	4.53029e-20
SLC36A1	-0.540067	7.54082	90.2112	2.16028e-21	4.65258e-20
CAPG	0.511801	8.79477	90.1757	2.1993e-21	4.73302e-20
PLXNB1	-0.979476	3.49243	90.1139	2.26902e-21	4.87935e-20
KLK13	2.6973	0.277406	89.9878	2.41835e-21	5.19652e-20
SPRY4	0.614479	5.9978	89.9688	2.44162e-21	5.24253e-20
UCHL3	0.732357	4.82125	89.8486	2.5946e-21	5.56679e-20
AAK1	-0.584981	6.28787	89.8124	2.64244e-21	5.66512e-20
DPH2	0.647433	5.32383	89.7722	2.69667e-21	5.77701e-20
GARS1	0.58095	6.28511	89.7539	2.72176e-21	5.82634e-20
TMC8	-1.02009	3.09034	89.7145	2.77647e-21	5.93895e-20
LRATD2	-1.45675	1.92402	89.7058	2.78869e-21	5.96059e-20
NANS	0.654335	5.36985	89.6202	2.91187e-21	6.21918e-20
PCDHB5	-1.02885	3.24006	89.5787	2.97366e-21	6.34634e-20
KLF16	0.575371	6.40186	89.5765	2.97691e-21	6.34849e-20
PDE12	-0.653972	5.33465	89.4327	3.20127e-21	6.82182e-20
CPE	0.686011	5.09927	89.4066	3.24378e-21	6.90719e-20
H3-2	-0.919713	3.63478	89.3552	3.32908e-21	7.0835e-20
MBLAC2	-1.37713	2.17134	89.3523	3.33395e-21	7.08852e-20
MITF	0.603864	5.99797	89.2592	3.49463e-21	7.42458e-20
NRBP1	0.538428	7.51184	89.0339	3.91604e-21	8.31364e-20
ELFN1	-1.42618	2.07718	89.0025	3.97855e-21	8.44002e-20
TTC28	0.740171	4.73033	88.9945	3.99466e-21	8.46783e-20
HCG26	-1.71611	1.67539	88.9912	4.00138e-21	8.47574e-20
DNMT3B	-1.31082	2.30764	88.8634	4.26839e-21	9.03454e-20
RNF145	0.578818	6.29059	88.8296	4.34177e-21	9.18299e-20
CDCA2	-0.668457	4.95473	88.8012	4.40451e-21	9.30873e-20
ALDH2	1.32816	2.27984	88.6738	4.69743e-21	9.92038e-20
ACVR2A	-0.780081	4.47061	88.6691	4.70862e-21	9.93659e-20
TP53INP2	0.64887	5.53615	88.6549	4.74263e-21	1.00009e-19
NAF1	0.854196	4.05757	88.6322	4.79712e-21	1.01083e-19
DNAJC3	0.551632	7.03467	88.4691	5.20947e-21	1.0969e-19
RBPMS2	1.7457	1.48672	88.4641	5.22259e-21	1.09884e-19
STX4	0.554299	7.03141	88.4088	5.37058e-21	1.12914e-19
UPK3BL2	-1.18807	2.78966	88.3772	5.45708e-21	1.14647e-19
ADORA2B	0.950948	3.64028	88.2403	5.848e-21	1.22769e-19
AKR1B1	0.579434	6.1472	88.1025	6.26977e-21	1.31526e-19
RASL11B	1.332	2.26082	87.8427	7.14933e-21	1.49866e-19
TNIP1	0.553749	6.9458	87.7707	7.41438e-21	1.55306e-19
SLC36A4	0.645336	5.45113	87.7478	7.50038e-21	1.56992e-19
DAAM1	0.781868	4.56573	87.6544	7.863e-21	1.6446e-19
AKR1C1	2.08275	1.03645	87.6109	8.03788e-21	1.67993e-19
COPS8	0.57402	6.23929	87.4545	8.6989e-21	1.81675e-19
IMPDH1	0.684336	4.88577	87.1437	1.01784e-20	2.12418e-19
NAPSB	-2.52828	0.133631	87.0879	1.04696e-20	2.18333e-19
ZC3H11B	-0.76839	4.59755	86.969	1.11179e-20	2.31682e-19
CENPE	-0.679167	4.79229	86.8844	1.16039e-20	2.41631e-19
GPATCH4	0.62734	5.39503	86.8194	1.19913e-20	2.49514e-19
CCP110	-0.750103	4.44525	86.7761	1.22571e-20	2.54857e-19
NR2F2	0.646816	5.29692	86.7138	1.26486e-20	2.62806e-19
ARHGAP15	-0.673695	5.0512	86.6277	1.32118e-20	2.74305e-19
UBE2W	0.571108	6.47811	86.6168	1.32846e-20	2.75614e-19
ESYT2	-0.542999	6.97309	86.5996	1.34006e-20	2.77817e-19
SERPINI1	-0.866923	3.94133	86.4788	1.42445e-20	2.95095e-19
PCGF2	-0.606613	5.81412	86.4549	1.4417e-20	2.98452e-19
CTIF	0.765693	4.5248	86.4027	1.48028e-20	3.06214e-19
NFATC2	-1.0044	3.34987	86.3295	1.53607e-20	3.17522e-19
PCDH20	-0.826368	4.31666	86.3221	1.5418e-20	3.18474e-19
SEMA6B	1.22817	2.8497	86.3206	1.54298e-20	3.18485e-19
NTNG1	2.80644	0.490641	86.3151	1.54726e-20	3.19136e-19
CASP10	-0.786035	4.44527	86.1372	1.69291e-20	3.48921e-19
FCGR1B	-0.826484	5.10428	86.08	1.74255e-20	3.58892e-19
TLR4	-0.591325	5.95155	86.0508	1.76845e-20	3.6396e-19
BMP8A	-1.01233	3.16547	85.9612	1.85043e-20	3.80556e-19
PTK2B	-0.495452	9.29086	85.946	1.86471e-20	3.83215e-19
TMEM140	-1.26577	3.19682	85.939	1.87131e-20	3.84292e-19
CALHM2	-0.635565	5.25174	85.922	1.88744e-20	3.87322e-19
FAM72C	-0.696359	4.73887	85.759	2.04956e-20	4.20286e-19
CSNK1G3	0.692618	4.92659	85.6621	2.15247e-20	4.41069e-19
NIPAL1	1.5564	1.98391	85.4549	2.39015e-20	4.89418e-19
RSPO3	1.9856	2.12042	85.4239	2.42791e-20	4.9679e-19
ZCCHC2	-0.536083	7.1952	85.4173	2.43604e-20	4.98093e-19
ARHGAP11B	-0.784164	4.15734	85.411	2.44373e-20	4.99304e-19
PAPLN	-0.726702	4.57051	85.3606	2.5068e-20	5.11821e-19
CACUL1	0.573211	6.2203	85.3424	2.53004e-20	5.16195e-19
SAMD8	0.661578	5.28419	85.3159	2.5641e-20	5.22766e-19
ARID4B	-0.566455	6.45683	85.3049	2.57836e-20	5.25294e-19
STK39	0.693174	4.81865	85.23	2.67794e-20	5.45189e-19
SAMHD1	-0.498966	8.78056	85.0087	2.99496e-20	6.09291e-19
SLC25A28	-0.784226	4.38543	84.9806	3.03773e-20	6.17547e-19
CITED2	-0.497491	9.08983	84.9629	3.06505e-20	6.22468e-19
MBNL1	-0.5185	7.72389	84.9621	3.06633e-20	6.22468e-19
KAZN	0.816499	4.12318	84.9134	3.14275e-20	6.37522e-19
NLRP2	0.530442	7.33817	84.8814	3.19404e-20	6.47463e-19
C2orf68	-0.849397	3.98781	84.6298	3.62727e-20	7.34756e-19
MAP3K6	-0.899913	3.6736	84.628	3.6306e-20	7.34904e-19
TDRD7	-0.573396	6.09069	84.6217	3.64223e-20	7.36731e-19
LDLRAD4	0.902495	3.8145	84.5591	3.75931e-20	7.59869e-19
PID1	1.98956	1.04284	84.5038	3.86596e-20	7.80868e-19
ASIC1	-0.913779	3.61652	84.3539	4.17019e-20	8.41719e-19
GHITM	0.517323	7.65436	84.2124	4.47951e-20	9.03506e-19
ME2	-0.567753	6.39117	84.2037	4.49934e-20	9.0686e-19
NRGN	-0.557026	6.39593	84.1464	4.63155e-20	9.32841e-19
LINC02458	1.0994	3.04209	84.0922	4.76017e-20	9.58064e-19
FOXK1	-0.669394	5.04146	84.0693	4.81572e-20	9.68556e-19
ATP1A3	1.29515	2.22877	83.9887	5.01596e-20	1.00811e-18
IDH3A	0.557262	6.38183	83.9663	5.07321e-20	1.01889e-18
SLC33A1	0.597933	5.75083	83.7805	5.57295e-20	1.11847e-18
PPT1	0.450865	11.2106	83.7291	5.71953e-20	1.14707e-18
MLLT6	-0.516684	7.72746	83.6749	5.87837e-20	1.17809e-18
C21orf91	-0.695825	5.05392	83.643	5.97401e-20	1.19641e-18
CLEC16A	0.639352	5.28417	83.6272	6.02201e-20	1.20517e-18
PCDHB2	-0.738641	4.59679	83.5701	6.19853e-20	1.23962e-18
P2RX5	1.49136	1.78419	83.5302	6.32477e-20	1.26397e-18
BRIP1	-0.840778	3.80488	83.3809	6.82079e-20	1.36213e-18
ZNF704	-1.32955	2.2888	83.2525	7.27829e-20	1.45247e-18
LINC00623	-0.707568	4.91478	83.2305	7.3598e-20	1.4677e-18
FCGR1CP	-0.892176	4.61079	83.2228	7.38828e-20	1.47234e-18
RAB27A	0.611316	5.61228	83.1724	7.579e-20	1.50929e-18
GCLC	0.547965	6.63193	83.1539	7.65051e-20	1.52246e-18
PIEZO2	-1.24947	2.40998	83.1331	7.73107e-20	1.53741e-18
ARHGAP27P1	-1.01286	3.16396	83.0853	7.9203e-20	1.57393e-18
TTC7A	0.527238	7.14005	83.0178	8.19559e-20	1.62749e-18
NUP50	-0.566644	6.09263	82.9912	8.30639e-20	1.64834e-18
DENND6B	-1.00921	3.24385	82.9671	8.40847e-20	1.66742e-18
RASD2	-0.943043	3.72589	82.9617	8.43107e-20	1.67073e-18
RAB18	0.584902	5.92348	82.8337	8.99522e-20	1.78128e-18
TPX2	-0.549551	6.22794	82.808	9.11293e-20	1.80333e-18
BMP2	-1.09193	3.19244	82.7843	9.2224e-20	1.82371e-18
DLGAP5	-0.661762	4.80094	82.756	9.35535e-20	1.84871e-18
CD58	0.566447	6.20118	82.6378	9.9321e-20	1.96131e-18
MOB3A	-0.519078	7.45747	82.6114	1.00653e-19	1.98623e-18
SND1	0.522723	7.22426	82.5461	1.0403e-19	2.05145e-18
NBEAL2	-0.58166	5.77801	82.5281	1.04985e-19	2.06882e-18
FAM72B	-0.667655	4.81571	82.4568	1.08838e-19	2.14325e-18
RPS6KC1	0.803731	4.16204	82.3811	1.13085e-19	2.22535e-18
ARMCX3	0.542133	6.66678	82.3334	1.15846e-19	2.27809e-18
ARCN1	0.503605	8.02446	82.2291	1.22123e-19	2.39986e-18
CDK1	-0.583319	5.5324	82.121	1.28986e-19	2.53296e-18
SUMF2	-0.561451	6.23319	82.099	1.3043e-19	2.55953e-18
HSD17B4	0.53476	6.77869	81.9871	1.38026e-19	2.70672e-18
PDXK	0.515448	7.30778	81.9718	1.39098e-19	2.72586e-18
DOCK2	-0.510731	7.62172	81.8724	1.46267e-19	2.86436e-18
LMNA	-0.487664	8.90764	81.8482	1.48072e-19	2.8977e-18
CSMD3	-1.16373	2.6515	81.8228	1.49987e-19	2.93315e-18
FNDC3A	-0.506824	7.92064	81.7543	1.55272e-19	3.0344e-18
N4BP1	-0.533152	6.83898	81.6041	1.67529e-19	3.27167e-18
HEG1	-0.568352	5.92473	81.5953	1.68274e-19	3.28396e-18
EPB41L3	-1.03968	3.31967	81.5349	1.73492e-19	3.38346e-18
PLK1	-0.619537	5.08727	81.5091	1.75769e-19	3.4255e-18
RIMS3	-0.486359	8.77361	81.3805	1.87588e-19	3.65332e-18
TBC1D3L	-1.15707	2.60874	81.3301	1.9243e-19	3.74503e-18
TMEM205	0.653617	5.06756	81.3079	1.94603e-19	3.78471e-18
ZSCAN30	-0.821546	4.10153	81.0764	2.18785e-19	4.2521e-18
PRCP	0.577037	5.98355	80.9581	2.32267e-19	4.51101e-18
ADGRE2	-0.543819	6.77874	80.8327	2.47478e-19	4.80314e-18
ZWINT	-0.55856	5.92486	80.7742	2.5491e-19	4.94399e-18
AREL1	0.547587	6.45361	80.7632	2.5634e-19	4.96833e-18
S100A4	-0.484063	8.90663	80.6449	2.72154e-19	5.27121e-18
ISOC1	0.712474	4.74647	80.6178	2.75898e-19	5.34007e-18
DOCK9	1.37722	2.20569	80.6114	2.76799e-19	5.35385e-18
ACVR1B	0.634829	5.25424	80.5746	2.82005e-19	5.45082e-18
PCMT1	0.522197	6.96459	80.56	2.84095e-19	5.48745e-18
TMTC3	0.887223	3.73975	80.5557	2.84709e-19	5.49243e-18
CNOT6	0.560992	6.1517	80.5555	2.84741e-19	5.49243e-18
AGAP3	0.53085	6.7814	80.5225	2.89531e-19	5.58103e-18
EGR1	-0.657775	5.3672	80.5018	2.92579e-19	5.63593e-18
SAV1	-0.759673	4.38404	80.4926	2.93946e-19	5.65841e-18
NAGK	-0.602979	5.45294	80.4827	2.95417e-19	5.68286e-18
ME1	0.554063	6.2081	80.4295	3.03482e-19	5.83404e-18
PTPN11	0.512226	7.30604	80.361	3.14172e-19	6.03544e-18
CCL3	0.727191	5.0411	80.3327	3.18703e-19	6.11831e-18
ABAT	0.842873	3.88313	80.3237	3.20168e-19	6.14228e-18
KNL1	-0.702854	4.46449	80.2856	3.26388e-19	6.25735e-18
PPP2R3A	0.651977	5.15906	80.2575	3.3106e-19	6.34263e-18
SLC39A7	0.463067	10.1001	80.1791	3.44461e-19	6.5949e-18
NEK10	-1.89187	1.32148	80.0535	3.67053e-19	7.02268e-18
TAX1BP1	0.531022	6.88477	79.9803	3.80913e-19	7.28293e-18
HESX1	-1.76599	1.31763	79.8842	3.99878e-19	7.64037e-18
GANC	-0.783265	4.18879	79.8157	4.13984e-19	7.90455e-18
RAB24	-0.697322	4.64094	79.7901	4.19387e-19	8.00231e-18
TAF6	-0.792508	4.10479	79.7887	4.19675e-19	8.00241e-18
POU2F2	-0.667299	4.92994	79.7066	4.37481e-19	8.33631e-18
HMGN1	-0.516994	7.03107	79.5494	4.73697e-19	9.02033e-18
FGD5-AS1	-0.519677	6.99094	79.5226	4.80177e-19	9.13758e-18
RARG	-0.585093	5.76337	79.3467	5.24853e-19	9.98102e-18
MAD2L1	-0.598472	5.28213	79.3127	5.33957e-19	1.01473e-17
HMOX2	0.548341	6.26189	79.3061	5.35749e-19	1.01746e-17
IFNGR1	-0.502183	7.6141	79.2989	5.37713e-19	1.0205e-17
NRIP3	0.559571	6.15375	79.2089	5.62758e-19	1.06732e-17
NSD2	-0.521553	6.74218	79.2048	5.63929e-19	1.06882e-17
SMS	0.523167	6.86517	79.0677	6.04456e-19	1.14486e-17
CHI3L2	2.67244	1.28656	78.9838	6.30646e-19	1.19367e-17
CROT	-1.15921	2.66579	78.96	6.38297e-19	1.20734e-17
CTSO	-0.545689	6.72938	78.9584	6.38809e-19	1.2075e-17
CNN2	-0.515505	7.13714	78.9337	6.46847e-19	1.22188e-17
UBALD2	-0.576444	5.80115	78.9224	6.50543e-19	1.22804e-17
EME1	-0.993658	2.9096	78.8758	6.66078e-19	1.25653e-17
RFLNB	-0.606484	5.40767	78.8573	6.72329e-19	1.26747e-17
JAG2	-0.672832	4.79841	78.8353	6.79863e-19	1.28082e-17
ABHD6	0.832862	3.80627	78.8285	6.82215e-19	1.2844e-17
CHD9	0.521457	6.96529	78.8139	6.8728e-19	1.29307e-17
PLK3	0.613543	5.5238	78.7911	6.95259e-19	1.30722e-17
PDCD4	0.6668	4.86814	78.7841	6.97706e-19	1.31095e-17
SGTB	-0.584057	5.74736	78.562	7.80723e-19	1.46595e-17
FAM107B	-0.521013	6.99634	78.4742	8.16178e-19	1.53151e-17
MARCHF3	1.12847	2.59548	78.382	8.55166e-19	1.60361e-17
KCNQ1	-0.960043	3.24333	78.3488	8.69659e-19	1.6297e-17
NEXN	-2.41605	-0.0927743	78.3016	8.9067e-19	1.66797e-17
USP12	0.513242	7.10469	78.2754	9.0255e-19	1.6891e-17
ITGB8	0.989883	3.28019	77.8881	1.09801e-18	2.05354e-17
TK1	-0.568928	5.58437	77.8754	1.10504e-18	2.06483e-17
ZFYVE28	-0.954037	3.4284	77.8746	1.10551e-18	2.06483e-17
C9orf72	0.927946	3.43003	77.8622	1.11247e-18	2.07646e-17
ANKRD50	0.570878	5.76582	77.7906	1.15354e-18	2.1517e-17
GAREM1	-0.992976	3.07674	77.787	1.15562e-18	2.15416e-17
TRAM1	0.485164	8.23212	77.7351	1.18638e-18	2.21004e-17
KDM4B	0.56924	5.88249	77.6371	1.24669e-18	2.32085e-17
RPL8	0.468336	9.37593	77.6241	1.25493e-18	2.33467e-17
TMEM150B	-1.28871	2.55446	77.608	1.26519e-18	2.3522e-17
ADAMTS8	-0.67071	4.8217	77.5827	1.28153e-18	2.38101e-17
SLC37A3	1.14834	2.59023	77.4689	1.35749e-18	2.5205e-17
HECA	0.502225	7.64362	77.4622	1.3621e-18	2.5274e-17
IFRD2	-0.664165	4.71399	77.4283	1.38566e-18	2.56942e-17
NLRC3	-1.86486	0.943106	77.4263	1.38706e-18	2.57034e-17
COL11A1	-1.46523	1.5968	77.4047	1.40235e-18	2.59697e-17
SH3RF2	1.36908	2.20487	77.2998	1.47877e-18	2.73669e-17
TMEM192	0.604577	5.29444	77.2353	1.5279e-18	2.82576e-17
CDK19	-0.533272	6.47294	77.2249	1.53595e-18	2.8388e-17
FOXD1	-0.755469	4.38163	77.1877	1.56514e-18	2.89086e-17
BAIAP2	0.532767	6.50513	77.0496	1.67841e-18	3.09804e-17
TCTEX1D1	-0.529929	6.49516	76.9256	1.78718e-18	3.29502e-17
TBC1D23	0.543479	6.30385	76.9253	1.78745e-18	3.29502e-17
CHPT1	0.893619	3.37366	76.8763	1.83233e-18	3.37555e-17
TLR6	-0.644541	5.09637	76.8248	1.88069e-18	3.46238e-17
S1PR3	0.860641	3.81249	76.8151	1.88997e-18	3.4772e-17
ZBTB38	-0.547669	6.21842	76.808	1.8968e-18	3.4875e-17
IL6ST	0.555868	6.07372	76.8056	1.89909e-18	3.48944e-17
TMSB10	0.45	10.3098	76.7914	1.9128e-18	3.51234e-17
TRIP13	-0.75422	4.06814	76.7826	1.92133e-18	3.52572e-17
TMEM135	0.782816	4.10197	76.7723	1.93136e-18	3.54184e-17
SLC39A11	0.548634	6.12639	76.7316	1.97155e-18	3.61319e-17
MAFG	-0.503969	7.221	76.7005	2.00281e-18	3.6681e-17
NPIPB5	-0.558543	5.81734	76.6831	2.02061e-18	3.6983e-17
CYB5R2	-1.16218	2.60018	76.6783	2.02547e-18	3.70481e-17
GSN	0.425111	11.5156	76.5152	2.19983e-18	4.02112e-17
TPSAB1	0.887032	3.51017	76.5096	2.20602e-18	4.02984e-17
EHD1	-0.580291	5.85202	76.4184	2.3103e-18	4.2176e-17
TRIM23	0.733407	4.42044	76.3733	2.36357e-18	4.31206e-17
SPRYD3	0.573517	5.73253	76.2046	2.57437e-18	4.69363e-17
EIF4EBP2	0.505879	7.00463	76.1752	2.61293e-18	4.76085e-17
CCNB2	-0.690883	4.38637	76.1673	2.62344e-18	4.77692e-17
TIMP2	0.474231	8.51996	76.1254	2.67963e-18	4.87611e-17
DESI2	0.534641	6.2471	75.9301	2.95815e-18	5.37946e-17
ANKRD30B	3.57676	-0.245265	75.8289	3.11368e-18	5.65865e-17
TBKBP1	0.5642	6.08084	75.8195	3.12851e-18	5.68195e-17
APBB1	0.977743	3.34406	75.8123	3.13998e-18	5.69912e-17
CACNA2D3	2.35665	0.423482	75.734	3.26687e-18	5.92563e-17
SGCB	0.663891	4.72146	75.6384	3.42888e-18	6.21551e-17
DOC2A	-1.55498	1.43808	75.5263	3.62903e-18	6.5741e-17
PAFAH1B2	0.547832	6.03549	75.5026	3.67299e-18	6.64948e-17
MCTP1	0.586102	5.57439	75.4412	3.78887e-18	6.85487e-17
MTMR11	-0.913116	3.3735	75.4267	3.81687e-18	6.90111e-17
ADCY1	-0.676557	4.49276	75.4139	3.84169e-18	6.94155e-17
LOC145783	-0.743779	4.33967	75.4004	3.86789e-18	6.98443e-17
PTGFRN	-0.643889	4.76888	75.3825	3.90326e-18	7.04379e-17
SEC24A	0.548989	6.12396	75.3751	3.91784e-18	7.06561e-17
USP6NL	-0.827806	4.05331	75.3714	3.92525e-18	7.07446e-17
IQSEC2	-0.631987	5.14827	75.355	3.95795e-18	7.12884e-17
ADORA1	2.35615	0.765491	75.3206	4.02753e-18	7.24956e-17
TOGARAM2	1.35136	1.76187	75.3136	4.04182e-18	7.27064e-17
NIPBL-DT	-0.99394	3.03033	75.1943	4.29337e-18	7.71824e-17
SPAG5	-0.54965	5.68096	75.1668	4.3536e-18	7.82155e-17
LAIR1	-0.464444	9.21083	75.1219	4.45377e-18	7.99643e-17
CBX7	-0.949794	3.11944	75.1091	4.48267e-18	8.04321e-17
CHML	-0.616918	5.03183	75.1064	4.48891e-18	8.0493e-17
SH3GLB2	-0.610815	5.16284	75.1037	4.49506e-18	8.05521e-17
SPPL2B	-0.655432	4.83212	75.024	4.68003e-18	8.38138e-17
MYO5C	2.05472	2.11013	74.9926	4.75512e-18	8.51047e-17
CCND3	0.483361	7.86399	74.9509	4.85644e-18	8.6863e-17
SLFN11	-0.53384	6.24654	74.9299	4.90837e-18	8.77363e-17
NACC1	0.494455	7.40288	74.874	5.04943e-18	9.02008e-17
APOBEC3A_B	-1.56275	1.48256	74.7958	5.2534e-18	9.37852e-17
TRAF1	-0.643822	5.2095	74.7803	5.29481e-18	9.44647e-17
AMD1	0.481527	7.95673	74.7298	5.43173e-18	9.68464e-17
CERT1	0.53133	6.19102	74.6502	5.65512e-18	1.00766e-16
UPP1	0.516133	6.71101	74.6295	5.71488e-18	1.01767e-16
LOC100130238	3.23178	-0.0890919	74.6112	5.7679e-18	1.02646e-16
AQP3	1.01125	3.154	74.5491	5.95236e-18	1.05862e-16
CTSH	-0.482813	7.84899	74.4894	6.13499e-18	1.09019e-16
PLD2	-1.03167	3.13564	74.4886	6.13758e-18	1.09019e-16
FAT1	-0.482536	7.85172	74.4757	6.17783e-18	1.09665e-16
MAPK13	0.591124	5.34676	74.4678	6.20234e-18	1.10031e-16
IL17RA	0.478894	7.97294	74.3649	6.53435e-18	1.15848e-16
CLDN23	-0.760523	4.34269	74.34	6.61727e-18	1.17245e-16
TROAP	-0.997251	2.78885	74.3134	6.70683e-18	1.18757e-16
MTFR1L	0.585677	5.42887	74.2929	6.77679e-18	1.19921e-16
PURB	-0.512118	6.80632	74.2812	6.81714e-18	1.2056e-16
LSM2	-0.496249	7.0801	74.2664	6.86849e-18	1.21392e-16
RASA3	-0.501883	6.95253	74.2422	6.953e-18	1.22809e-16
VEGFC	-0.88118	3.79979	74.234	6.98184e-18	1.23241e-16
TRIO	0.653193	4.895	74.2001	7.10298e-18	1.25301e-16
SRXN1	0.537799	6.15495	74.1052	7.45266e-18	1.31388e-16
DIO2	7.77333	-0.447218	74.1013	7.46735e-18	1.31565e-16
LYZ	0.725745	4.65566	74.0212	7.77632e-18	1.36923e-16
TNRC6B	-0.605251	5.30144	73.8773	8.36447e-18	1.47188e-16
ALPL	3.12809	-0.356878	73.7696	8.83298e-18	1.55335e-16
PMM2	0.595545	5.26597	73.7196	9.05984e-18	1.59226e-16
PFKL	-0.484674	7.57922	73.7139	9.08604e-18	1.59587e-16
NET1	-0.627608	4.89965	73.7071	9.1174e-18	1.60038e-16
CUL4B	-0.541189	5.95294	73.6516	9.37695e-18	1.64492e-16
SRC	-0.554977	6.06121	73.6255	9.5018e-18	1.66579e-16
PRDX1	0.470042	8.21998	73.6072	9.59031e-18	1.68027e-16
FAM76B	-0.938643	3.21734	73.5709	9.76839e-18	1.71041e-16
MXRA7	0.550492	5.86571	73.5482	9.88137e-18	1.72912e-16
FLVCR1	0.706719	4.36935	73.5384	9.93071e-18	1.73668e-16
WWTR1	1.05587	2.76431	73.4217	1.05351e-17	1.84124e-16
INPPL1	0.47546	7.98856	73.3408	1.09755e-17	1.91702e-16
MTOR	0.546224	5.88461	73.2799	1.13195e-17	1.97588e-16
MVB12B	0.672091	4.69094	73.214	1.1704e-17	2.04173e-16
HADHB	0.481161	7.67276	73.1842	1.18816e-17	2.07144e-16
BTN3A3	-0.690219	4.8987	73.1207	1.22702e-17	2.13787e-16
CAB39L	0.608326	5.19286	73.0706	1.25852e-17	2.1914e-16
RNF123	0.540808	5.98063	72.9584	1.33213e-17	2.31815e-16
SGO2	-0.654709	4.57677	72.9295	1.3518e-17	2.35094e-16
SPATA18	1.54908	1.53172	72.889	1.37979e-17	2.39813e-16
SLC35E2B	-0.544279	5.94746	72.8667	1.3955e-17	2.42395e-16
CCDC162P	0.627132	4.95962	72.8635	1.39776e-17	2.42639e-16
TPPP2	4.57275	-0.455084	72.837	1.41659e-17	2.45757e-16
JADE3	-1.36522	1.75479	72.792	1.4493e-17	2.51278e-16
NMNAT2	1.6684	1.4176	72.784	1.4552e-17	2.52146e-16
CXCL16	0.651054	4.89443	72.78	1.4581e-17	2.52493e-16
IDH3G	0.53998	6.01076	72.7635	1.47037e-17	2.54463e-16
TNFAIP3	-0.545551	6.00946	72.7099	1.51085e-17	2.61308e-16
STAT6	-0.48208	7.68677	72.64	1.56527e-17	2.70555e-16
ENTPD4	0.542043	6.00114	72.6298	1.57336e-17	2.71786e-16
ITGAE	0.815773	3.80158	72.6066	1.592e-17	2.74839e-16
DICER1	-0.53291	6.17303	72.5324	1.65296e-17	2.85189e-16
ATF3	-0.475848	7.9443	72.4692	1.70674e-17	2.94287e-16
BPI	-1.23086	2.43055	72.4245	1.74586e-17	3.00849e-16
ACP2	0.516142	6.63363	72.4167	1.75271e-17	3.01846e-16
PTPN9	-0.528277	6.18792	72.3221	1.83877e-17	3.16475e-16
TRAF3IP3	-0.672954	4.55422	72.2749	1.88324e-17	3.2393e-16
PDE3B	0.608546	5.08564	72.2666	1.89117e-17	3.24965e-16
GABBR2	1.402	1.83088	72.2662	1.89155e-17	3.24965e-16
C1orf21	-0.755515	4.32546	72.2165	1.93984e-17	3.33059e-16
CD276	-0.447765	9.67053	72.1722	1.98381e-17	3.40401e-16
NECTIN2	-0.486711	7.52325	72.0678	2.09158e-17	3.58677e-16
ARHGAP33	-0.96253	2.90491	72.0125	2.15102e-17	3.68646e-16
ATP6V1G1	0.498476	7.0074	71.9633	2.20529e-17	3.77717e-16
SSX2IP	0.740986	4.19856	71.9274	2.24574e-17	3.84414e-16
TMEM37	-1.34627	1.60781	71.9157	2.25913e-17	3.86472e-16
ACVR1	0.566335	5.72526	71.9101	2.26549e-17	3.87325e-16
PHB	0.498274	6.79333	71.8222	2.36866e-17	4.04719e-16
S100A6	0.457115	8.93702	71.8155	2.37677e-17	4.0586e-16
TYRO3	0.945757	3.02042	71.7913	2.40604e-17	4.10609e-16
SCLT1	-0.719432	4.20431	71.7607	2.44368e-17	4.16781e-16
EOMES	1.49606	3.05079	71.7382	2.47165e-17	4.21299e-16
TANGO6	0.664959	4.64243	71.737	2.47326e-17	4.21318e-16
HMGN3	-0.517514	6.47776	71.7195	2.49525e-17	4.24808e-16
PSMB8-AS1	-0.488996	7.12803	71.6714	2.55671e-17	4.35011e-16
MOB3C	-0.813361	3.97021	71.6395	2.59837e-17	4.41832e-16
RYR1	1.11824	2.6378	71.5305	2.74594e-17	4.66645e-16
DECR1	0.475886	7.77214	71.5133	2.77001e-17	4.70452e-16
VAT1L	0.604274	5.4565	71.4485	2.8624e-17	4.85852e-16
AMZ1	1.82912	1.10138	71.4381	2.87764e-17	4.88146e-16
SRGAP1	0.817277	3.90614	71.4321	2.8863e-17	4.89322e-16
FAM78A	0.511226	6.45608	71.3963	2.93912e-17	4.97977e-16
CASKIN2	-0.659361	4.75177	71.3852	2.95578e-17	5.005e-16
ZDHHC9	0.611576	5.06256	71.3743	2.97207e-17	5.02837e-16
TOB2	-0.611157	5.13367	71.3736	2.97314e-17	5.02837e-16
MYO1B	-0.570014	5.69275	71.3574	2.99766e-17	5.06682e-16
EMC3	0.502075	6.77857	71.278	3.12069e-17	5.27161e-16
IL12RB1	-1.05771	3.90588	71.1751	3.28776e-17	5.55053e-16
UQCRC2	0.479116	7.41005	71.1585	3.31558e-17	5.59415e-16
EML4	-0.505775	6.75808	71.1394	3.34768e-17	5.64494e-16
FAM32A	-0.525012	6.21488	71.1051	3.40646e-17	5.74064e-16
HVCN1	-0.990567	2.93947	71.0607	3.48397e-17	5.86775e-16
TIMM17A	0.496109	6.85574	70.8738	3.83001e-17	6.44672e-16
FRMD4A	0.486169	7.11551	70.8351	3.90578e-17	6.57035e-16
DNAJC9	-0.609753	4.84172	70.8137	3.94849e-17	6.63825e-16
C1orf226	0.99647	2.94667	70.8073	3.96131e-17	6.65585e-16
TMEM132A	0.539299	5.84406	70.7894	3.99742e-17	6.71254e-16
AHRR	-0.502136	6.66603	70.7509	4.07608e-17	6.84056e-16
FRY	-0.685687	4.45725	70.7198	4.14093e-17	6.94527e-16
LPAR2	-0.679832	4.49408	70.7092	4.16318e-17	6.97844e-16
BRD2	0.418515	10.981	70.6638	4.26006e-17	7.13662e-16
SDS	-0.50005	6.66179	70.6565	4.27573e-17	7.15862e-16
LMNB1	-0.505605	6.54365	70.5708	4.46552e-17	7.47196e-16
BHLHE22	-0.472671	7.7798	70.5435	4.52781e-17	7.5717e-16
CHSY1	-0.461642	8.37206	70.5359	4.54526e-17	7.59638e-16
DCAF12	-0.485847	7.15953	70.5235	4.57391e-17	7.63975e-16
SLC22A4	0.872058	3.76219	70.4982	4.63306e-17	7.73399e-16
HAUS4	-0.635881	4.76065	70.4052	4.85653e-17	8.10224e-16
RCSD1	0.565883	5.44861	70.3593	4.97069e-17	8.28781e-16
RUFY1	-0.579975	5.31137	70.3276	5.05141e-17	8.41743e-16
ULBP2	0.722439	4.27553	70.3155	5.08229e-17	8.46389e-16
MTMR1	0.632068	4.8195	70.2317	5.30285e-17	8.82602e-16
TONSL	-0.600661	4.93421	70.2191	5.33675e-17	8.87722e-16
RNF144A	-1.14562	2.14286	70.1609	5.49656e-17	9.13767e-16
VILL	-1.29171	1.92038	70.0875	5.70485e-17	9.47837e-16
ZNF804A	0.55941	5.6472	70.085	5.71203e-17	9.48472e-16
ANKRD13C	0.602171	5.13914	70.0088	5.93689e-17	9.85232e-16
NSFP1	0.508829	6.53914	70.0075	5.94108e-17	9.85348e-16
ZC3H18	-0.568688	5.40933	69.9554	6.0999e-17	1.0111e-15
PCLAF	-0.617602	4.71489	69.8416	6.46201e-17	1.07033e-15
KIF18B	-0.689482	4.19767	69.8408	6.46482e-17	1.07033e-15
SDHB	0.538961	5.80124	69.7316	6.83248e-17	1.13054e-15
LOC646214	-1.10652	2.60987	69.6916	6.97255e-17	1.15304e-15
NKAIN1	-1.57954	1.45465	69.6578	7.09285e-17	1.17225e-15
GPR42	-5.76411	-0.969368	69.6487	7.1257e-17	1.17699e-15
CPM	0.66894	4.83649	69.6193	7.23285e-17	1.19399e-15
TTC21A	-1.44884	1.35831	69.5181	7.61324e-17	1.25605e-15
DCAF13	0.538307	5.79557	69.5013	7.67841e-17	1.26606e-15
STK32C	0.658418	4.57121	69.4781	7.76918e-17	1.28028e-15
ARHGEF12	0.535222	5.83213	69.376	8.18203e-17	1.34753e-15
LOC100288203	-1.3551	1.68231	69.2812	8.58474e-17	1.41303e-15
CCNG2	-0.733936	4.16366	69.2635	8.66187e-17	1.4249e-15
EXOSC4	0.61353	4.99521	69.2298	8.81109e-17	1.4486e-15
ILRUN	0.459871	8.19043	69.1888	8.99634e-17	1.4782e-15
ZNF608	-2.89606	-0.280055	69.1324	9.25727e-17	1.52019e-15
EDC3	0.536236	5.77869	69.1295	9.27069e-17	1.52151e-15
SHANK3	0.70222	4.23085	69.0401	9.70058e-17	1.59114e-15
KLHL24	-0.553339	5.61884	69.0159	9.82012e-17	1.60982e-15
MAPK11	-0.868605	3.39819	68.9599	1.01032e-16	1.65526e-15
PATJ	2.0831	0.566982	68.9404	1.02035e-16	1.67072e-15
MACO1	0.606566	5.10029	68.8194	1.08491e-16	1.7754e-15
LINC01305	-1.07695	2.64507	68.7946	1.09859e-16	1.79676e-15
PNPLA2	0.584858	5.2506	68.7745	1.10987e-16	1.81416e-15
PREX1	-0.493336	6.71479	68.689	1.15902e-16	1.89339e-15
SPARCL1	-0.770244	4.02814	68.573	1.22924e-16	2.00695e-15
CIRBP	-0.511944	6.28792	68.5659	1.23363e-16	2.01296e-15
FOXRED2	-0.6296	4.63281	68.5602	1.23723e-16	2.01766e-15
UHRF1BP1L	0.546662	5.72334	68.5072	1.27092e-16	2.07142e-15
CTNS	0.669253	4.57871	68.4583	1.30285e-16	2.12223e-15
BEX3	0.488113	6.78074	68.4556	1.30462e-16	2.1239e-15
AK1	0.517077	6.21364	68.3678	1.36401e-16	2.21931e-15
LAMA3	0.700077	4.31406	68.2529	1.4458e-16	2.35103e-15
RUFY4	-3.60683	0.426585	68.2021	1.48352e-16	2.41097e-15
GAMT	-0.735876	4.00281	68.1861	1.49558e-16	2.42917e-15
ABCD4	-0.590667	5.12529	68.1408	1.53035e-16	2.48423e-15
GABRA2	-3.48956	-0.490665	68.1233	1.54399e-16	2.50493e-15
NEMP2	-0.864338	3.38985	68.097	1.56473e-16	2.53712e-15
ZNF217	-0.492853	6.67549	68.0476	1.60436e-16	2.59989e-15
SLC8A1	-0.719121	4.40977	67.8424	1.78026e-16	2.88329e-15
SUN2	-0.451519	8.264	67.8148	1.80537e-16	2.92228e-15
SKI	0.536778	5.67064	67.8078	1.81184e-16	2.93107e-15
MIGA1	0.848767	3.52758	67.7329	1.88192e-16	3.0427e-15
SEMA6D	-1.73758	1.09987	67.7237	1.89068e-16	3.05513e-15
DBF4B	-0.83165	3.29415	67.7204	1.89394e-16	3.05726e-15
PSMG3-AS1	-0.745865	4.13069	67.7201	1.89417e-16	3.05726e-15
POMGNT1	-0.524981	5.95028	67.691	1.92234e-16	3.10097e-15
ATP8B2	0.487562	6.84362	67.6596	1.95317e-16	3.14889e-15
POLR3B	0.950093	2.99852	67.6189	1.99389e-16	3.21273e-15
BCAP31	0.44691	8.57652	67.6118	2.00106e-16	3.22243e-15
LRPAP1	0.453892	8.0845	67.5211	2.09523e-16	3.37216e-15
IL12RB2	-0.559235	5.50802	67.4668	2.15376e-16	3.4644e-15
CHRAC1	-0.669273	4.48176	67.4276	2.197e-16	3.53193e-15
POPDC3	0.846169	3.4549	67.4161	2.20987e-16	3.55061e-15
C4orf54	-3.03556	-0.176907	67.4041	2.22335e-16	3.57024e-15
VGLL3	3.60505	-0.418	67.3799	2.25083e-16	3.61232e-15
KIF15	-0.659919	4.30963	67.3377	2.29942e-16	3.6882e-15
FBXO9	0.508244	6.12113	67.3154	2.32562e-16	3.72812e-15
ID1	-0.847614	3.17797	67.2912	2.3544e-16	3.7721e-15
ARF4	0.467438	7.46261	67.2719	2.37753e-16	3.80701e-15
VAMP3	0.506685	6.26792	67.1858	2.48364e-16	3.97467e-15
NCAPG2	-0.515434	5.81761	67.0986	2.59587e-16	4.15192e-15
CLSTN2	0.533725	5.73488	67.0803	2.62014e-16	4.18837e-15
LOC644634	-1.20171	2.10624	67.0576	2.65039e-16	4.23433e-15
PLD1	0.701903	4.18322	67.0457	2.66643e-16	4.25755e-15
VOPP1	-0.483145	6.86141	67.0265	2.69257e-16	4.29687e-15
CD101	0.860707	3.17399	66.9371	2.81742e-16	4.49357e-15
LOC100129034	0.441639	8.84048	66.9066	2.86135e-16	4.56106e-15
CD59	-0.478526	6.97153	66.9042	2.86489e-16	4.56413e-15
CMTM3	-0.470651	7.0976	66.8008	3.01901e-16	4.80696e-15
UBA6	-0.502862	6.46382	66.701	3.1758e-16	5.05376e-15
CDCA8	-0.663757	4.26585	66.6822	3.20618e-16	5.09923e-15
TRIM44	-0.511264	6.01758	66.6526	3.25473e-16	5.17353e-15
BTBD8	-1.2778	2.09122	66.6455	3.26644e-16	5.18924e-15
CPXM1	-1.97141	1.53753	66.5825	3.37244e-16	5.35463e-15
IARS1	0.4627	7.38075	66.5669	3.39926e-16	5.39418e-15
PLXNA2	1.43195	2.14772	66.5269	3.46886e-16	5.50155e-15
EMX1	2.69683	-0.104241	66.475	3.56146e-16	5.64291e-15
OSGIN2	0.507682	6.21094	66.4747	3.56199e-16	5.64291e-15
DLG3	-0.803701	3.57819	66.4645	3.58052e-16	5.6691e-15
GOLGA8K	-1.10661	2.35388	66.4548	3.59805e-16	5.69365e-15
CHRM3	-0.969172	2.78971	66.3703	3.75565e-16	5.93972e-15
VPS26C	0.496016	6.47495	66.3423	3.80939e-16	6.02134e-15
REC8	-0.91884	3.1032	66.3339	3.82559e-16	6.04357e-15
LRFN5	-0.938368	3.40211	66.2727	3.9462e-16	6.23063e-15
PCNX1	0.476242	7.22245	66.2701	3.9514e-16	6.23536e-15
SH3PXD2B	-0.529258	5.86809	66.2382	4.01587e-16	6.33356e-15
ETHE1	-0.547609	5.70618	66.1585	4.18155e-16	6.59119e-15
CNR1	0.469733	7.26692	66.0905	4.32829e-16	6.81868e-15
CYBB	0.505364	6.82744	66.0727	4.3675e-16	6.87662e-15
IL1RAP	0.722648	4.28567	66.0555	4.40576e-16	6.933e-15
CXCR3	-1.65374	0.909476	66.0321	4.45846e-16	7.01204e-15
KIF20A	-0.622609	4.52978	65.9532	4.64057e-16	7.29438e-15
ATP6V0A1	0.490012	6.52785	65.8297	4.94059e-16	7.76166e-15
CD55	-0.48697	6.61979	65.8266	4.94816e-16	7.76924e-15
GRM4	-3.34294	-0.50215	65.7747	5.08026e-16	7.97224e-15
PDSS2	0.615064	4.86652	65.7085	5.2537e-16	8.23983e-15
KCP	-0.667905	4.36145	65.649	5.41481e-16	8.4878e-15
C1orf52	0.711614	4.22622	65.6184	5.49933e-16	8.61551e-15
NUB1	-0.531108	6.10408	65.4921	5.8634e-16	9.18079e-15
NARS1	0.44908	7.93114	65.4887	5.87353e-16	9.19157e-15
FMNL1	-0.454382	7.77078	65.4718	5.92408e-16	9.26555e-15
NPEPPS	0.462372	7.3667	65.4197	6.08254e-16	9.50814e-15
MCU	0.597297	5.05261	65.4035	6.13281e-16	9.58141e-15
HS3ST1	-1.75021	0.775306	65.2828	6.51992e-16	1.01806e-14
ACSL4	0.440416	8.65205	65.2561	6.60899e-16	1.0314e-14
BMP6	1.02313	2.99071	65.2254	6.71282e-16	1.04702e-14
MATN2	-0.924797	3.0386	65.1741	6.88976e-16	1.07403e-14
ACER3	0.612469	4.7855	65.1612	6.93484e-16	1.08017e-14
LARP1B	0.693221	4.24148	65.1607	6.93681e-16	1.08017e-14
STMN1	-0.462061	7.09033	65.1339	7.03179e-16	1.09436e-14
CCR2	-1.1304	2.32167	64.9269	7.81029e-16	1.21485e-14
LRRC3	-0.7009	4.20197	64.8848	7.97908e-16	1.24042e-14
ATG3	0.509624	6.10728	64.7888	8.37717e-16	1.30159e-14
CTSB	0.370175	12.6253	64.758	8.50918e-16	1.32138e-14
TMEM181	0.484867	6.45627	64.7053	8.73949e-16	1.3564e-14
CEBPD	-0.871028	3.4365	64.6895	8.8099e-16	1.36657e-14
CCL4L2	-1.07333	3.62556	64.6822	8.84274e-16	1.37091e-14
JUN	0.459254	7.47488	64.639	9.03874e-16	1.40053e-14
LOC648987	-1.22866	2.2627	64.4355	1.00218e-15	1.55201e-14
RNF19B	-0.601339	5.39241	64.4272	1.00638e-15	1.55766e-14
MRPL2	0.577092	5.04827	64.3739	1.03397e-15	1.59949e-14
CKAP2L	-0.580228	4.81053	64.3454	1.04904e-15	1.62191e-14
PJA1	0.652334	4.6739	64.3081	1.06912e-15	1.65205e-14
WNK2	1.20369	2.11031	64.2919	1.07794e-15	1.66477e-14
H2AZ2	-0.502587	5.93178	64.2886	1.0797e-15	1.66658e-14
FUCA1	-0.632126	4.7201	64.2109	1.12313e-15	1.73266e-14
HSP90B1	0.421924	9.66258	64.1978	1.13063e-15	1.7433e-14
CORO1A	-0.430946	9.00131	64.1961	1.13159e-15	1.74382e-14
MICALL1	-0.505284	6.12263	64.1521	1.15715e-15	1.78224e-14
F2RL3	-1.45297	1.35262	64.1225	1.17469e-15	1.80827e-14
SRPRA	0.454565	7.44953	64.0729	1.20461e-15	1.85331e-14
PDGFRL	-2.48691	-0.104498	64.034	1.22862e-15	1.88922e-14
PCBP4	-0.598471	4.8812	64.0208	1.23691e-15	1.90094e-14
ZNF219	0.554654	5.19574	63.9413	1.28784e-15	1.97813e-14
PKD1P3-NPIPA1	-0.451094	7.51803	63.9235	1.29951e-15	1.99498e-14
GXYLT1	0.67051	4.32464	63.8754	1.33161e-15	2.04316e-14
ASF1A	0.526324	5.76907	63.8383	1.35692e-15	2.08086e-14
AP1S3	-0.733934	4.13327	63.8294	1.36302e-15	2.08907e-14
TFPI	0.82797	3.49772	63.7923	1.38895e-15	2.12767e-14
KLF5	-1.31392	1.85747	63.7354	1.42962e-15	2.18878e-14
INPP5D	-0.446384	7.81289	63.7146	1.44481e-15	2.21084e-14
CALU	0.438472	8.16389	63.6901	1.46292e-15	2.23734e-14
MROH6	-0.646148	4.47651	63.363	1.72705e-15	2.63987e-14
OGFR	-0.45849	7.29057	63.3549	1.73414e-15	2.64927e-14
GMPR	-0.837914	3.29519	63.3388	1.74839e-15	2.6696e-14
KIAA1841	-0.727927	3.93733	63.3218	1.76351e-15	2.69123e-14
TSKU	1.1817	2.07037	63.1865	1.88895e-15	2.8811e-14
SYT11	0.713682	4.13355	62.9838	2.09362e-15	3.19155e-14
LAMB3	0.528127	5.44336	62.9554	2.12394e-15	3.23603e-14
ATP13A2	0.643921	4.44356	62.8908	2.19476e-15	3.34213e-14
MAN2A2	-0.5075	5.82199	62.8817	2.20498e-15	3.35589e-14
DKK2	1.15813	2.41149	62.8679	2.22048e-15	3.37767e-14
NFYC-AS1	-1.02183	2.54731	62.8103	2.28634e-15	3.47597e-14
MLEC	0.438462	7.97221	62.7676	2.33645e-15	3.55025e-14
CD209	-0.768596	4.08407	62.7571	2.34892e-15	3.56727e-14
SH3BGRL3	0.424146	9.15784	62.7544	2.35213e-15	3.57024e-14
SLC35B1	0.538129	5.41047	62.6897	2.43063e-15	3.6874e-14
BNIP3L	0.483488	6.45865	62.6635	2.4632e-15	3.73482e-14
SMARCC2	-0.497347	6.05792	62.6416	2.49077e-15	3.7746e-14
MEIOB	0.787851	3.49708	62.5986	2.54564e-15	3.85568e-14
ZNF395	-0.588923	4.83461	62.5717	2.58071e-15	3.9067e-14
MELK	-0.536284	5.17531	62.569	2.58419e-15	3.90989e-14
YEATS2	-0.498373	6.01186	62.5585	2.59804e-15	3.92874e-14
FAM89A	0.643287	4.41526	62.5231	2.64515e-15	3.99784e-14
SLC37A4	-0.765174	3.68194	62.4808	2.7025e-15	4.08233e-14
GOLGA8Q	-0.996959	2.95099	62.4593	2.73224e-15	4.12506e-14
TLE4	-0.517752	5.73169	62.447	2.74937e-15	4.14869e-14
MFN2	0.456447	7.12517	62.4163	2.79257e-15	4.21165e-14
ERCC1	0.504712	5.99312	62.3543	2.88183e-15	4.34394e-14
CACNA1C	2.55178	0.203633	62.3395	2.90355e-15	4.37435e-14
EFEMP2	-0.918608	3.18257	62.2904	2.97682e-15	4.48235e-14
ADGRE4P	0.748742	3.91033	62.2504	3.03786e-15	4.57183e-14
SPATA20	-0.503278	5.92961	62.2376	3.05773e-15	4.59927e-14
IRF2BP2	0.454475	7.1729	62.2004	3.116e-15	4.68444e-14
ANKRD10	0.47395	6.61339	62.1576	3.18443e-15	4.78477e-14
COL6A1	0.406572	10.1377	62.0258	3.40477e-15	5.11312e-14
GMFG	-0.491263	6.15716	61.978	3.48837e-15	5.23588e-14
HSPG2	0.508015	5.7543	61.9366	3.56241e-15	5.34419e-14
PARP8	-0.529856	5.55763	61.8649	3.69462e-15	5.53958e-14
CKS1B	-0.538956	5.17168	61.8261	3.76801e-15	5.64662e-14
ADAMDEC1	-0.443523	7.60274	61.719	3.97866e-15	5.95913e-14
P2RY6	-0.772981	3.88354	61.6391	4.14337e-15	6.20255e-14
FAM86DP	0.666978	4.29196	61.6339	4.15441e-15	6.21579e-14
FAM131B	0.886077	3.18006	61.5636	4.3052e-15	6.438e-14
TGFBI	-0.40362	10.2679	61.5434	4.3496e-15	6.50095e-14
CD99L2	-0.461034	6.96541	61.5353	4.36766e-15	6.5245e-14
TRIM27	0.441746	7.61095	61.5276	4.38461e-15	6.54636e-14
EPHX4	-1.20607	1.96392	61.4737	4.50638e-15	6.72461e-14
QSOX1	0.420066	9.15191	61.4616	4.53407e-15	6.76236e-14
ZNF292	-0.523858	5.54769	61.4458	4.57054e-15	6.81317e-14
SHISAL1	1.43061	1.24863	61.4401	4.5839e-15	6.82948e-14
STRAP	0.48887	6.10413	61.4277	4.61287e-15	6.86903e-14
CLN5	0.475624	6.55016	61.4245	4.62037e-15	6.87657e-14
NUAK1	-0.730663	4.04922	61.4233	4.62318e-15	6.87714e-14
SASH1	-0.478698	6.28053	61.395	4.69008e-15	6.97298e-14
MBD6	-0.598961	4.77494	61.3628	4.7675e-15	7.08436e-14
ANKRD46	0.568283	4.97711	61.3463	4.80754e-15	7.14011e-14
SHANK1	0.537959	5.3347	61.3204	4.87106e-15	7.23065e-14
PNPO	0.473522	6.45023	61.2525	5.04194e-15	7.48037e-14
MAP3K14	0.571119	4.95084	61.2464	5.05778e-15	7.49994e-14
GOLGA4	0.476045	6.44345	61.2411	5.0714e-15	7.5162e-14
PTPRF	0.793083	3.50692	61.215	5.13886e-15	7.61219e-14
ANGEL2	-0.662726	4.35445	61.1123	5.41402e-15	8.01559e-14
SLC35E2A	-0.618752	4.65487	61.0107	5.70068e-15	8.43557e-14
UBE2V2	0.473696	6.42343	60.9843	5.77757e-15	8.54489e-14
C22orf42	-1.55653	1.38845	60.9783	5.79514e-15	8.56639e-14
NXN	0.586426	4.8303	60.9764	5.80083e-15	8.57032e-14
MYO6	0.429587	8.22757	60.9463	5.89034e-15	8.69801e-14
TRIM55	2.61948	-0.157096	60.9442	5.8965e-15	8.70257e-14
RARA	0.514258	5.62278	60.9168	5.97905e-15	8.8198e-14
NIPSNAP3A	-0.621921	4.58283	60.9128	5.99115e-15	8.83304e-14
ULK1	-0.567118	5.01952	60.8571	6.16314e-15	9.08188e-14
LSG1	0.51651	5.54183	60.8414	6.21246e-15	9.14979e-14
SP140	-0.96911	3.01455	60.8324	6.24092e-15	9.18692e-14
FGD6	0.988077	2.71697	60.7794	6.41119e-15	9.43265e-14
RASL10A	1.36364	1.70659	60.7198	6.6082e-15	9.71746e-14
CCPG1	0.61355	4.65795	60.6284	6.92209e-15	1.01738e-13
ITM2B	-0.418772	9.01427	60.6077	6.99546e-15	1.02762e-13
KIF1C	0.471422	6.45833	60.5656	7.14648e-15	1.04926e-13
ZNF33B	-1.17569	1.93727	60.5561	7.18113e-15	1.0538e-13
RENBP	-0.556365	5.09206	60.5391	7.24343e-15	1.06239e-13
PIP4K2C	0.521177	5.58282	60.5375	7.24911e-15	1.06268e-13
PAPSS1	0.458637	6.82815	60.5313	7.27202e-15	1.06548e-13
LOC100190986	-1.07184	2.36097	60.4934	7.41355e-15	1.08566e-13
CIAPIN1	0.506087	5.68869	60.4794	7.46652e-15	1.09285e-13
FKBP1A	0.440249	7.54109	60.4454	7.59629e-15	1.11127e-13
GNA15	-0.487522	6.22918	60.4134	7.72084e-15	1.1289e-13
SDCCAG8	0.454485	7.01633	60.4114	7.72857e-15	1.12945e-13
ATG101	0.658991	4.39587	60.4071	7.74556e-15	1.13135e-13
TSLP	-2.20683	0.364887	60.4	7.7737e-15	1.13487e-13
FDPS	0.449606	7.08752	60.3631	7.92085e-15	1.15576e-13
MSANTD4	0.687569	4.17029	60.335	8.03443e-15	1.17173e-13
RGS13	-0.832864	3.07121	60.2967	8.19226e-15	1.19413e-13
CLVS1	1.88054	0.948381	60.2897	8.22151e-15	1.19777e-13
TIPARP	0.558531	5.15466	60.231	8.47045e-15	1.23341e-13
AARS1	0.465277	6.56944	60.2278	8.48407e-15	1.23475e-13
DDX60L	-0.425515	8.27363	60.2079	8.57042e-15	1.24668e-13
APOC1P1	1.45835	1.4741	60.1647	8.76036e-15	1.27365e-13
GCNT1	-0.842759	3.37115	60.1531	8.81231e-15	1.28055e-13
KLHL6	-0.474333	6.39628	60.151	8.82179e-15	1.28127e-13
IMMT	0.457828	6.78093	60.1472	8.8385e-15	1.28277e-13
RASAL2	0.444108	7.44065	60.1466	8.8412e-15	1.28277e-13
KDM6B	-0.77012	4.03489	60.1445	8.85091e-15	1.28352e-13
KLHL30	1.12622	1.82627	60.1288	8.92158e-15	1.2931e-13
TCF7L2	-0.953027	2.94377	60.0684	9.19965e-15	1.33272e-13
SRD5A3	0.536889	5.24136	60.0385	9.34032e-15	1.35241e-13
NECTIN1	0.757082	3.60375	60.0209	9.42435e-15	1.36388e-13
NCK2	-0.448485	7.01722	59.8591	1.02315e-14	1.47993e-13
TMEM70	0.501769	5.7775	59.8212	1.04306e-14	1.50796e-13
BTBD1	0.462628	6.68511	59.8151	1.04628e-14	1.51184e-13
FAM111A	-0.481378	5.99067	59.8076	1.05026e-14	1.51682e-13
DRAM1	0.823604	3.9044	59.8003	1.05419e-14	1.52171e-13
FBLN2	4.84251	-0.95346	59.7448	1.0843e-14	1.56438e-13
LOC153684	-1.22444	2.0145	59.7377	1.08824e-14	1.56927e-13
GALNT16	-2.00732	0.332197	59.7096	1.10386e-14	1.59097e-13
ERP29	-0.464079	6.59043	59.7009	1.10878e-14	1.59726e-13
MT1E	-1.04688	2.60777	59.6668	1.12816e-14	1.62435e-13
AP3D1	0.42237	8.31699	59.5273	1.21096e-14	1.74268e-13
BMP4	-0.992502	2.52513	59.5235	1.21335e-14	1.74522e-13
PLXNB2	-0.414699	8.99512	59.51	1.22165e-14	1.75628e-13
S1PR2	-0.691194	4.12078	59.5019	1.22671e-14	1.76264e-13
CPNE1	-0.471812	6.38984	59.489	1.23475e-14	1.7733e-13
ECE1	0.666227	4.19592	59.4583	1.25416e-14	1.80026e-13
CCT7	0.425988	8.03468	59.4474	1.26114e-14	1.80937e-13
HEATR3	0.507535	5.60855	59.4255	1.27524e-14	1.82866e-13
CTH	1.27353	2.18809	59.3758	1.30786e-14	1.87449e-13
ST3GAL2	0.497422	5.92327	59.3587	1.31925e-14	1.88985e-13
BLVRB	0.583868	4.84263	59.3417	1.3307e-14	1.9053e-13
FLI1	-0.50739	5.60088	59.3383	1.333e-14	1.90762e-13
PTGER2	1.74233	0.810305	59.3258	1.34154e-14	1.91887e-13
TMEM63A	-0.453048	6.88424	59.233	1.40626e-14	2.01042e-13
FKBP4	0.534828	5.31667	59.1218	1.48805e-14	2.12627e-13
DEK	-0.456822	6.67647	59.119	1.49012e-14	2.12816e-13
CCR1	-0.422216	8.32268	59.0837	1.51712e-14	2.16564e-13
TBC1D9	0.565024	5.02672	59.0821	1.51831e-14	2.16623e-13
HCAR2	2.94731	0.982393	59.0708	1.52707e-14	2.17764e-13
TSPAN18	1.14442	2.38917	59.0656	1.53114e-14	2.18234e-13
APOBEC3C	-0.510587	5.67214	59.0459	1.54651e-14	2.20313e-13
PHF20L1	0.46594	6.49528	59.033	1.55667e-14	2.21648e-13
VTI1B	0.455075	6.71576	58.9982	1.58441e-14	2.25485e-13
GSDME	0.59942	4.6617	58.9202	1.64849e-14	2.34486e-13
BCL3	-0.643216	4.7528	58.9106	1.65657e-14	2.35518e-13
EIF2S1	0.444433	7.08218	58.8872	1.67638e-14	2.38215e-13
C15orf39	-0.48716	5.96226	58.8483	1.70987e-14	2.42852e-13
SDCBP	0.410383	9.15144	58.8007	1.75166e-14	2.48662e-13
FAM92A	0.640714	4.59587	58.7164	1.82835e-14	2.59419e-13
SLC43A3	-0.423701	8.01927	58.696	1.84738e-14	2.61987e-13
SMIM4	-0.872657	3.15526	58.6759	1.86637e-14	2.64547e-13
LAT2	0.435242	7.43472	58.655	1.88632e-14	2.67241e-13
C12orf49	0.512885	5.42212	58.6341	1.90643e-14	2.69955e-13
MDH2	0.444962	7.02826	58.5958	1.94392e-14	2.75126e-13
NIPA1	0.633099	4.36272	58.55	1.98964e-14	2.81455e-13
[truncated: 26,279 more rows]

## Sheet: qlf.MAFBsiIFNgmtb_vs_IFNgmtb
Gene	logFC	logCPM	F	PValue	FDR
MMRN2	-5.08033	4.46437	1519.95	0	0
CHODL	-5.0452	5.35942	2605.35	0	0
THBS1	-4.31144	4.91329	1933.9	0	0
CD163	-4.03062	6.9506	3410.06	0	0
ABCG1	4.00058	6.10346	2939.09	0	0
CCL8	-3.88619	6.37383	3339.93	0	0
CXCL11	-3.72561	4.79656	2180.73	0	0
CCL2	-3.71228	6.65018	3178.83	0	0
IGFN1	3.60323	6.64326	2738.65	0	0
LIF	3.54398	5.4699	2133.1	0	0
CCL7	-3.49448	5.07796	2130.52	0	0
LBH	-3.47578	7.2558	2601.5	0	0
MAFB	-3.35285	8.45727	3120.73	0	0
MSR1	-3.11006	8.53833	2764.86	0	0
CXCL10	-3.02063	7.54205	2541.42	0	0
SLC7A8	-2.9142	7.55853	2216.02	0	0
C5AR1	-2.84869	7.98764	2299.67	0	0
MYD88	-2.6637	6.75049	1790.84	0	0
C5AR2	-2.46614	8.64533	1850.97	0	0
COL6A3	2.25181	9.10405	1594.32	0	0
GM2A	2.21576	9.2061	1571.09	0	0
APOC1	2.1751	8.56035	1455.94	1.51651819574339e-317	1.94927734278218e-314
FCGBP	-4.49117	5.0407	1449.15	4.42875158429683e-316	5.44505379570393e-313
MMP8	-3.66826	4.43773	1426.67	3.17828727019347e-311	3.74482e-308
NR1H3	2.57831	5.45062	1377.1	1.61127e-300	1.82254e-297
CHIT1	2.17631	7.37809	1340.87	1.07775e-292	1.17217e-289
IFIT2	-2.23249	6.56483	1326.97	1.0868e-289	1.13824e-286
MERTK	-2.09062	7.26766	1227.51	3.37907e-268	3.41262e-265
CSF1	1.82636	10.4608	1214.55	2.14136e-265	2.08805e-262
CDH23	2.35678	5.91311	1185.75	3.59472e-259	3.38838e-256
APOE	1.9186	8.87786	1179.49	8.12825e-258	7.41454e-255
FZD7	-2.50213	5.39342	1165.73	7.67264e-255	6.78022e-252
TLR2	-1.93726	7.72498	1133.27	7.99391e-248	6.85005e-245
ISG20	-2.63286	4.53102	1120.21	5.33572e-245	4.43775e-242
ATP6V1C2	-2.46449	5.47207	1113.49	1.51616e-243	1.22497e-240
DDIT4L	-2.43607	5.29315	1111.82	3.48801e-243	2.73983e-240
RCAN1	-1.97137	7.27323	1090.91	1.16057e-238	8.86989e-236
FBP1	3.64302	4.20544	1077.29	1.02562e-235	7.63225e-233
EFNB2	2.33577	5.41897	1071.5	1.83448e-234	1.33014e-231
MYLK	2.00706	7.01152	1055.89	4.36994e-231	3.08933e-228
CCN1	3.27711	4.28831	1035.91	9.19149e-227	6.33944e-224
SGK1	1.77331	8.7602	1018.21	6.2109e-223	4.18171e-220
LINC01010	2.17371	5.81378	1010	3.71789e-221	2.44499e-218
CXCL9	-1.93999	6.19403	1008.31	8.61231e-221	5.53498e-218
MARCKS	-2.26474	5.09165	986.284	5.03499e-216	3.16399e-213
PHLDA3	2.22261	5.64003	972.707	4.37092e-213	2.68698e-210
LGI2	-1.95199	6.77326	971.678	7.29814e-213	4.391e-210
NPR1	2.46219	4.95978	966.918	7.82842e-212	4.61192e-209
RAI14	1.77609	7.9622	966.398	1.01406e-211	5.85218e-209
DCSTAMP	1.73534	8.50019	963.074	5.31699e-211	3.00708e-208
RRAD	2.16875	5.24528	938.137	1.32943e-205	7.37131e-203
IFIT1	-1.73845	7.79009	936.265	3.38021e-205	1.83818e-202
INA	-3.38617	4.11495	933.43	1.38869e-204	7.40931e-202
HERC5	-2.04235	5.58914	933.316	1.46958e-204	7.6957e-202
CD300A	-2.45797	5.0076	918.026	3.00328e-201	1.54412e-198
TIE1	1.78179	7.31133	908.007	4.43401e-199	2.23902e-196
GAL	1.92903	6.18708	896.78	1.19556e-196	5.93122e-194
MMP19	-1.76952	6.96627	892.484	1.01824e-195	4.96443e-193
ITGB5	-1.63947	9.11337	887.083	1.50449e-194	7.21084e-192
SCD	1.55363	10.3967	886.375	2.14144e-194	1.00926e-191
GPR84	-2.24693	5.02066	885.019	4.21033e-194	1.9518e-191
SPRED1	-1.89322	6.78262	883.23	1.02727e-193	4.68535e-191
CEMIP	-1.95348	6.04827	882.183	1.73156e-193	7.77221e-191
NPTX1	-2.00414	5.73196	873.088	1.6141e-191	7.13181e-189
NCF2	1.87276	6.10861	866.496	4.32117e-190	1.87991e-187
CYP1B1	1.64941	8.33133	859.989	1.10867e-188	4.75014e-186
TMEM158	-1.75315	7.16964	857.895	3.1507e-188	1.32978e-185
GALM	-1.95724	5.7369	856.174	7.43304e-188	3.09105e-185
NDRG2	1.70905	7.3828	855.113	1.26164e-187	5.17053e-185
MLPH	2.972	4.13699	848.126	4.1128e-186	1.66145e-183
INHBA	1.85888	5.88542	831.999	1.28009e-182	5.09835e-180
CLEC5A	2.4274	4.52585	824.606	5.11363e-181	2.00838e-178
MTHFD2L	-2.30449	4.80973	819.307	7.18957e-180	2.78502e-177
ZFP36L2	1.66928	7.45189	814.99	6.19206e-179	2.3662e-176
S100A9	1.86887	5.77196	809.151	1.13985e-177	4.29767e-175
TM4SF1	4.66273	2.92246	806.147	5.10072e-177	1.89787e-174
SLC29A3	1.80119	6.18816	794.825	1.44664e-174	5.31275e-172
TSPAN17	1.57337	8.18062	782.063	8.42355e-172	3.05386e-169
STAC2	2.05338	5.47022	781.917	9.06137e-172	3.24351e-169
RGL1	-2.95312	3.43679	779.673	2.77604e-171	9.81259e-169
MEF2C	-1.64073	7.63399	776.126	1.62958e-170	5.68904e-168
ADGRG1	1.68372	6.73004	767.888	9.93481e-169	3.42606e-166
ALOX5	-2.00962	5.83789	767.766	1.05579e-168	3.59707e-166
TIMP1	1.41685	10.5635	753.916	1.05864e-165	3.56382e-163
NAV3	2.38429	4.4011	746.716	3.84691e-164	1.2798e-161
SNCB	2.81408	3.99205	746.197	4.98503e-164	1.63915e-161
UBD	-2.46417	3.55579	735.211	1.19833e-161	3.89497e-159
IL6R-AS1	2.71587	3.67787	734.299	1.88934e-161	6.07123e-159
SLC12A8	1.6805	6.5771	733.629	2.64023e-161	8.3888e-159
SLA	1.5685	7.53564	725.173	1.79601e-159	5.64307e-157
EGR3	-2.27804	4.50474	723.355	4.45036e-159	1.38294e-156
PDGFRB	2.84062	4.13799	723.145	4.94218e-159	1.51908e-156
TIMP3	1.35357	11.0674	722.128	8.21133e-159	2.49677e-156
C3AR1	-2.21835	4.54497	721.425	1.16604e-158	3.5078e-156
FCRLA	1.6965	6.40312	713.367	6.50869e-157	1.9374e-154
NECTIN3	-1.6865	6.06862	711.768	1.44583e-156	4.25889e-154
GLIS3	-1.74626	5.92581	710.116	3.29658e-156	9.61038e-154
CCL20	1.60789	6.51891	707.003	1.55918e-155	4.49904e-153
PSD3	1.47927	8.27027	702.12	1.78421e-154	5.09634e-152
TEAD3	2.58202	3.93634	697.006	2.29143e-153	6.4797e-151
NT5DC2	-1.96179	6.06709	696.694	2.67807e-153	7.49808e-151
OCSTAMP	1.63423	6.39557	695.298	5.37572e-153	1.49034e-150
CDK5RAP2	1.56679	7.25865	693.758	1.15974e-152	3.184e-150
ITK	2.76363	3.40328	691.469	3.63569e-152	9.88559e-150
SIPA1L1	-1.78399	5.40553	690.815	5.03968e-152	1.35726e-149
TFRC	1.43695	8.59646	673.403	3.00149e-148	8.00718e-146
RTN4R	1.80099	5.43994	669.446	2.16451e-147	5.72039e-145
HAP1	3.0463	3.31899	664.309	2.81354e-146	7.3668e-144
KLF3	-1.58602	6.53456	663.476	4.26511e-146	1.1065e-143
LTA4H	1.72377	5.86893	659.198	3.61004e-145	9.28044e-143
SH3BP5	1.53553	6.71884	655.241	2.60349e-144	6.63258e-142
CDC20	-1.66813	6.66133	649.338	4.96206e-143	1.25283e-140
SLC4A7	-1.55433	6.74293	648.183	8.83215e-143	2.21023e-140
PLEKHA4	-2.27076	4.30404	646.862	1.70831e-142	4.23751e-140
METTL7B	1.56262	6.37436	640.023	5.19751e-141	1.27805e-138
GFOD1	1.59096	6.1998	635.428	5.1554e-140	1.25676e-137
DDX58	-1.44201	7.30877	633.3	1.49208e-139	3.60625e-137
PDE4DIP	2.08123	4.43874	632.372	2.37187e-139	5.68405e-137
ARL4C	-1.46698	7.24647	630.895	4.95925e-139	1.17847e-136
HSPB7	1.49725	7.01654	628.638	1.53105e-138	3.60792e-136
IFI44L	-1.49613	6.45248	627.586	2.5896e-138	6.05195e-136
SECTM1	-1.54418	5.93606	626.503	4.4472e-138	1.0308e-135
PAX8-AS1	1.64498	6.08344	624.633	1.13143e-137	2.60119e-135
DGAT2	1.50731	6.83628	623.841	1.68024e-137	3.83176e-135
GSG1L	1.93433	4.94236	623.813	1.70404e-137	3.85496e-135
RAB7B	-1.37295	8.5779	622.787	2.84509e-137	6.38519e-135
XYLT1	-1.60257	6.6286	621.39	5.71599e-137	1.27273e-134
SLC43A2	-1.5446	6.0429	620.648	8.27704e-137	1.82858e-134
ABCA4	4.00697	2.71252	616.401	6.90467e-136	1.51357e-133
TMEM255A	-1.82738	5.62077	616.124	7.92911e-136	1.72476e-133
CD52	1.34608	9.17379	613.049	3.68313e-135	7.95049e-133
LINC02009	2.46251	3.77962	612.25	5.48877e-135	1.17584e-132
CLIP4	1.79111	5.37957	607.118	7.12316e-134	1.5145e-131
RNASE1	-3.23126	3.20252	606.723	8.68007e-134	1.83175e-131
B4GALT1	-1.42752	7.27439	606.097	1.18662e-133	2.48557e-131
GIMAP8	-1.71743	4.95295	605.017	2.03469e-133	4.23065e-131
MRC2	-1.38278	8.28757	603.648	4.03094e-133	8.3202e-131
ZNFX1	-1.39079	7.63973	602.817	6.10736e-133	1.25148e-130
FANCE	1.59371	5.94928	602.78	6.22029e-133	1.26545e-130
RGS2	-1.4363	7.17149	601.242	1.34071e-132	2.70803e-130
ATF5	-1.38997	7.50596	600.882	1.60485e-132	3.21858e-130
PLAU	-1.34444	8.74346	597.875	7.20947e-132	1.4357e-129
RDH10	1.57985	6.09378	594.947	3.11205e-131	6.15402e-129
IGFBP4	-1.68484	5.4796	593.669	5.89126e-131	1.1569e-128
ADAMTS15	-1.90153	5.1995	592.792	9.13117e-131	1.78077e-128
IL4I1	-1.43371	6.64811	592.027	1.33832e-130	2.59212e-128
CTSC	-1.38713	7.88118	591.173	2.04981e-130	3.94317e-128
MFSD12	1.31017	9.38799	591.072	2.15635e-130	4.12008e-128
BABAM2	1.59304	5.98042	590.647	2.6663e-130	5.06025e-128
SLC16A6	2.03899	4.68821	590.514	2.84957e-130	5.37201e-128
ACP5	1.51029	6.30116	589.725	4.22479e-130	7.91183e-128
INHBE	3.56934	2.35532	589.335	5.13509e-130	9.5533e-128
KCNF1	4.24882	2.55283	586.837	1.78848e-129	3.30554e-127
CXCL8	1.31711	8.84239	586.588	2.02511e-129	3.71858e-127
GIMAP6	-1.87648	4.84233	583.057	1.18207e-128	2.15656e-126
CLMP	-1.8557	4.87325	580.955	3.37776e-128	6.12285e-126
PTGDS	1.83071	5.05364	580.67	3.89472e-128	7.01495e-126
LRRC8A	1.33387	8.41379	579.715	6.27478e-128	1.12303e-125
ADAP2	-1.98929	4.63028	579.376	7.43225e-128	1.32182e-125
ABCA1	1.30386	9.15352	576.433	3.23442e-127	5.71644e-125
PLXNC1	1.45521	6.63169	575.539	5.05529e-127	8.8791e-125
TNFSF10	-1.4397	6.21383	572.325	2.51809e-126	4.39546e-124
FSCN1	1.33344	8.23675	567.715	2.51979e-125	4.37145e-123
TRIB1	1.35555	7.65829	565.811	6.52263e-125	1.12468e-122
LRP12	-1.32668	7.96466	562.787	2.95597e-124	5.06599e-122
TOP2A	-1.45681	7.5371	557.97	3.28108e-123	5.58929e-121
SOX13	2.15894	4.17059	557.29	4.60863e-123	7.80376e-121
NDRG1	1.34964	7.59526	556.173	8.05056e-123	1.35508e-120
SLC5A3	1.31523	8.22171	555.257	1.27226e-122	2.12881e-120
AIF1	-1.35064	7.60865	552.027	6.38967e-122	1.06287e-119
IFNGR2	-1.28205	8.72406	547.446	6.30457e-121	1.04258e-118
TBC1D2	1.47934	6.03786	547.055	7.66536e-121	1.26024e-118
GBP4	-1.33583	7.1524	546.975	7.97906e-121	1.30423e-118
LACC1	-1.37783	7.08339	546.287	1.12526e-120	1.82874e-118
ANXA2	1.23243	9.87621	542.723	6.67798e-120	1.07908e-117
VGF	2.79471	3.34489	539.913	2.71987e-119	4.37003e-117
SSBP3	1.37184	7.10709	539.654	3.09626e-119	4.94666e-117
ATP10A	-1.87444	4.89532	537.245	1.03202e-118	1.63953e-116
A2M	-1.14421	11.3619	535.392	2.60438e-118	4.11434e-116
CALHM6	-2.18534	3.55262	534.859	3.39994e-118	5.3413e-116
AGO2	-1.36054	7.20283	532.962	8.77445e-118	1.37085e-115
CHRNA9	5.43412	2.16513	530.739	2.66524e-117	4.14107e-115
CPA4	4.90494	2.29713	524.762	5.28335e-116	8.16408e-114
TBX15	-1.61636	5.1711	524.217	6.93814e-116	1.06629e-113
DUSP2	1.43241	6.31081	523.22	1.14203e-115	1.74564e-113
MAP1B	1.80407	4.95101	523.023	1.26002e-115	1.91564e-113
PYROXD2	-2.46066	4.46855	522.09	2.00933e-115	3.03849e-113
TNFSF14	1.3761	6.82544	518.956	9.61992e-115	1.44698e-112
ARHGEF10	1.68397	5.38586	518.023	1.53398e-114	2.29513e-112
TRIM22	-1.35191	6.49817	516.761	2.88228e-114	4.28975e-112
RAP1GAP	2.35063	3.86451	516.019	4.17551e-114	6.18194e-112
WIPF1	-1.3615	6.76088	515.137	6.48964e-114	9.55803e-112
AHCYL1	1.22702	9.19488	512.067	3.01014e-113	4.41041e-111
TFEB	1.3887	6.46828	510.452	6.74929e-113	9.83796e-111
TMEM106A	-1.48953	5.50623	508.776	1.55968e-112	2.26178e-110
PINK1	1.42871	6.27159	508.013	2.28402e-112	3.29529e-110
LOXL4	-1.60124	5.8088	504.531	1.30219e-111	1.86921e-109
IER3	1.23666	8.18127	500.018	1.24275e-110	1.77487e-108
PDGFA	-1.49684	6.13668	499.94	1.29238e-110	1.83648e-108
ARID5B	-1.61258	4.94873	499.543	1.57573e-110	2.22793e-108
STRA6	2.66207	3.21867	492.219	6.13221e-109	8.6272e-107
FAM43A	1.55386	5.33934	491.581	8.43492e-109	1.18081e-106
HK2	1.20765	8.7582	490.739	1.28505e-108	1.79008e-106
C3	1.27432	7.38301	487.941	5.20412e-108	7.21383e-106
STEAP3	1.4744	6.07159	487.336	7.04452e-108	9.71731e-106
NES	1.22717	8.25419	486.96	8.50035e-108	1.16686e-105
LPAR6	-1.33056	6.66635	482.085	9.72708e-107	1.3288e-104
TRANK1	-1.351	6.34274	481.828	1.10586e-106	1.50344e-104
ST8SIA4	-1.47089	5.72831	481.537	1.27873e-106	1.73015e-104
FGR	1.74742	4.69634	479.407	3.70932e-106	4.99486e-104
SYNGR1	2.08471	4.09595	476.405	1.66408e-105	2.23018e-103
SERPINE1	1.38396	6.20628	475.009	3.34536e-105	4.46226e-103
COL13A1	3.08968	2.96159	472.51	1.1668e-104	1.54905e-102
OXR1	-1.23858	7.67175	471.78	1.68067e-104	2.22085e-102
TNFSF13B	-1.38095	5.49576	471.068	2.39926e-104	3.15564e-102
PDP1	1.28837	6.87569	471.025	2.45185e-104	3.20987e-102
LFNG	1.48109	5.42663	470.185	3.73234e-104	4.86373e-102
ALCAM	1.13586	9.97068	466.913	1.9163e-103	2.48574e-101
SBSN	3.35306	2.64707	466.493	2.36372e-103	3.05211e-101
GPNMB	1.19184	8.47031	465.338	4.21191e-103	5.41384e-101
CD109	-1.18709	8.8361	464.139	7.67155e-103	9.81612e-101
DLG5	-1.4348	5.87731	463.256	1.19272e-102	1.51926e-100
ZNF532	-1.41195	5.82339	459.332	8.48908e-102	1.07648e-99
SHB	1.61209	4.96474	458.099	1.57248e-101	1.98512e-99
USP18	-1.24715	6.8326	453.486	1.57902e-100	1.98451e-98
NFIL3	-1.36481	6.06452	452.111	3.14196e-100	3.93134e-98
SLC9A9	-2.4162	3.59615	451.692	3.87405e-100	4.82601e-98
QPCT	2.02002	4.21432	451.107	5.18946e-100	6.4363e-98
IFI16	-1.17809	8.09882	450.96	5.58577e-100	6.89757e-98
SLC31A2	-1.22656	7.02834	448.895	1.56868e-99	1.92866e-97
LOC105371763	1.62658	4.6994	446.908	4.23797e-99	5.18793e-97
HIF1A	-1.17053	8.15985	446.036	6.556e-99	7.99097e-97
MX2	-1.2034	7.202	444.364	1.51281e-98	1.83373e-96
VGLL4	-1.31987	6.38419	444.358	1.51741e-98	1.83373e-96
SELENON	1.11801	9.72994	443.708	2.09961e-98	2.52651e-96
B4GALNT3	1.36471	5.87508	443.286	2.59311e-98	3.10712e-96
APOBEC3G	-1.37493	5.54302	443.178	2.7378e-98	3.26664e-96
MYO5C	3.4732	2.11013	441.19	7.4004e-98	8.79279e-96
GMFB	-1.31833	6.37241	439.727	1.53766e-97	1.81933e-95
TGFBI	-1.08398	10.2679	437.636	4.37592e-97	5.15593e-95
IL36B	3.9049	2.35305	437.512	4.65729e-97	5.46469e-95
PLCXD1	1.3161	6.46681	437.254	5.29865e-97	6.19153e-95
LAIR1	-1.12397	9.21083	435.442	1.31166e-96	1.52639e-94
FFAR2	-4.5211	2.17186	434.471	2.13124e-96	2.46997e-94
PNOC	-1.76608	4.38844	434.429	2.17634e-96	2.51194e-94
GPAT3	1.20576	7.14149	434.124	2.53605e-96	2.91522e-94
MFSD2A	1.16718	7.89131	433.972	2.73609e-96	3.13244e-94
CREG1	1.16832	7.92829	432.354	6.14682e-96	7.00887e-94
GOLGA8N	-1.55453	5.54294	430.033	1.96232e-95	2.22854e-93
GCLM	1.43419	5.39214	429.866	2.13287e-95	2.41253e-93
UBA7	-1.23518	6.75794	428.662	3.89646e-95	4.38981e-93
IL36RN	3.69157	2.0783	427.501	6.96328e-95	7.8138e-93
MKI67	-1.32169	6.9882	427.07	8.63828e-95	9.65507e-93
CENPF	-1.38219	6.73698	426.798	9.89861e-95	1.10202e-92
FYB1	-1.8034	4.31969	424.367	3.33977e-94	3.70361e-92
CITED2	-1.10679	9.08983	420.289	2.56772e-93	2.83633e-91
TMEM119	-3.79727	2.19751	419.43	3.94624e-93	4.34209e-91
CREM	-1.41091	5.1456	418.565	6.08347e-93	6.66777e-91
ITGA7	1.40783	5.50838	418.06	7.83257e-93	8.55171e-91
PRKAA1	-1.36302	5.83536	416.693	1.55175e-92	1.68771e-90
MCUB	-2.05968	3.74648	415.858	2.35625e-92	2.55288e-90
ATP8B4	-1.28705	6.37903	415.818	2.40392e-92	2.59458e-90
ITGA6	1.25142	6.66659	415.098	3.4474e-92	3.70668e-90
SMIM14	1.3758	5.8269	414.719	4.16563e-92	4.46196e-90
CD47	-1.26014	6.42269	414.571	4.48615e-92	4.78715e-90
CMPK2	-1.17103	6.98862	413.92	6.21344e-92	6.6054e-90
ZNF618	-1.35785	5.6307	411.698	1.88874e-91	2.00036e-89
IFI44	-1.19942	6.65532	411.077	2.57744e-91	2.71958e-89
AREG	1.21511	6.60228	410.71	3.09552e-91	3.25409e-89
SDC3	-1.12895	7.98972	410.622	3.23559e-91	3.38874e-89
HSPB3	-1.81859	4.1533	410.096	4.2095e-91	4.39248e-89
P2RX4	-1.26031	6.10811	409.598	5.4006e-91	5.61464e-89
SQSTM1	1.08686	9.20718	407.386	1.63298e-90	1.69148e-88
THSD7A	-1.42675	5.64165	407.234	1.76255e-90	1.81903e-88
MMP14	-0.978654	11.6811	405.609	3.97281e-90	4.0852e-88
MAP3K7CL	-1.74254	4.45098	405.117	5.08246e-90	5.20731e-88
DEPP1	3.13123	2.29814	403.036	1.43985e-89	1.46989e-87
ISG15	-1.12233	7.67463	402.305	2.07542e-89	2.1111e-87
CFH	-1.75856	3.74886	401.72	2.78084e-89	2.81852e-87
PPP1R16B	-2.04025	4.00153	401.67	2.85162e-89	2.87993e-87
LOC100996724	2.09975	3.30147	400.577	4.92669e-89	4.9579e-87
COL8A2	2.81285	2.5019	400.055	6.39717e-89	6.41487e-87
TRPS1	-1.28603	5.83614	399.9	6.91317e-89	6.90779e-87
HMGCS1	1.12241	7.98458	399.142	1.01044e-88	1.0061e-86
TCF4	-1.56417	4.91027	398.262	1.56935e-88	1.55712e-86
CASP1	-1.30434	5.52361	397.999	1.78955e-88	1.7694e-86
AP2A1	1.20438	6.71903	395.629	5.85891e-88	5.77277e-86
LINC02158	2.72416	2.77706	395.276	6.99161e-88	6.86489e-86
MCEMP1	1.77493	4.36669	393.805	1.4597e-87	1.42829e-85
MT2A	-1.54631	4.69517	392.801	2.4122e-87	2.35214e-85
TMEM184C	-1.1397	7.52477	390.199	8.87055e-87	8.61998e-85
TSPAN7	2.73218	2.90905	388.673	1.90377e-86	1.84365e-84
SMOX	-1.3782	5.27514	386.857	4.72233e-86	4.55761e-84
CCN4	3.61571	2.02248	386.663	5.20408e-86	5.00548e-84
TMEM104	1.33108	5.62054	385.719	8.3495e-86	8.00363e-84
MRAS	1.07615	8.50351	384.038	1.93584e-85	1.84938e-83
DHRS3	-1.41796	5.09792	383.917	2.05661e-85	1.95814e-83
CEBPA	1.15458	7.05307	381.886	5.68245e-85	5.39222e-83
HBEGF	1.08525	8.09566	380.653	1.0533e-84	9.96159e-83
ABTB2	1.80316	3.92925	378.957	2.46202e-84	2.3207e-82
FAT1	-1.10521	7.85172	378.603	2.93965e-84	2.76171e-82
ZNF703	-1.62212	4.62616	377.649	4.7386e-84	4.43702e-82
STK38L	-1.14185	6.91399	377.393	5.38443e-84	5.02511e-82
CD93	-1.19166	6.75637	377.123	6.16508e-84	5.73475e-82
KIFC1	-1.1852	7.33212	376.65	7.81064e-84	7.23428e-82
LRP8	1.15482	6.90072	376.645	7.82831e-84	7.23428e-82
DDAH1	2.43589	3.36291	376.607	7.98013e-84	7.35056e-82
RPS6KA1	1.05174	9.0203	375.891	1.14221e-83	1.04868e-81
LAMP3	-2.45999	2.21445	375.679	1.27005e-83	1.16228e-81
MRPS6	1.13057	7.12207	374.75	2.02158e-83	1.84407e-81
DDIT4	-1.56705	4.68239	374.371	2.44358e-83	2.22185e-81
TM4SF19	1.15581	6.84522	374.085	2.82014e-83	2.55602e-81
LIPG	2.00599	3.59816	372.935	5.01369e-83	4.52962e-81
CYSLTR1	-1.51836	5.44761	371.958	8.17495e-83	7.36214e-81
WBP1L	-1.32041	5.55659	371.792	8.88365e-83	7.97498e-81
RNF19B	-1.25382	5.39241	371.078	1.26998e-82	1.13647e-80
PTP4A3	-1.21399	6.23726	370.256	1.91703e-82	1.71009e-80
GBP1	-1.05269	8.16264	368.74	4.09424e-82	3.64078e-80
MTUS1	1.81292	4.21627	368.475	4.67484e-82	4.14405e-80
ZC3H12D	-2.01965	3.71688	367.516	7.55257e-82	6.67411e-80
DIXDC1	1.67785	4.28229	365.047	2.59953e-81	2.29002e-79
SVIL	-1.42907	5.10854	364.736	3.03709e-81	2.66717e-79
TLR4	-1.25265	5.95155	364.718	3.0644e-81	2.68282e-79
CARMIL3	2.86995	2.37877	362.419	9.68506e-81	8.4529e-79
CPNE6	2.89688	2.23269	362.279	1.03912e-80	9.04132e-79
CD44	1.03021	9.00338	361.559	1.48997e-80	1.29244e-78
IL1B	0.990759	10.0265	361.202	1.78147e-80	1.54056e-78
IFITM1	-1.08883	7.05691	360.999	1.97181e-80	1.69997e-78
COL27A1	-2.18835	3.17157	359.681	3.81512e-80	3.27915e-78
EHD4	-1.11656	7.09133	359.039	5.25999e-80	4.50733e-78
LGALS3	1.04322	8.32328	358.806	5.91203e-80	5.05077e-78
METTL9	1.15676	6.70167	358.466	7.00625e-80	5.96755e-78
PKDCC	-1.66395	4.70767	357.248	1.28946e-79	1.09499e-77
KCNG1	2.13381	3.31683	357.092	1.39412e-79	1.18033e-77
IPCEF1	-1.30667	6.0674	356.962	1.48749e-79	1.25562e-77
HMGB2	-1.25798	6.43661	356.259	2.1152e-79	1.78017e-77
DOCK3	1.87599	3.89075	356.104	2.28574e-79	1.91799e-77
LIMK2	-1.48036	4.52747	355.121	3.73983e-79	3.12884e-77
GYPC	-1.14819	6.5304	354.847	4.28846e-79	3.57726e-77
NCOA7	-1.17813	5.9288	354.244	5.79983e-79	4.82376e-77
VSIR	1.12572	6.74723	353.373	8.96978e-79	7.43834e-77
TRIM14	-1.09348	7.11575	353.147	1.00432e-78	8.30414e-77
KLF9	1.16851	6.22963	353.103	1.02698e-78	8.46671e-77
PPM1K	-1.5267	4.35571	351.223	2.6326e-78	2.16409e-76
EOMES	2.21938	3.05079	350.647	3.51197e-78	2.87859e-76
OAF	1.06739	7.76206	350.388	3.99781e-78	3.26734e-76
SGMS2	2.16048	3.60742	349.193	7.27114e-78	5.92546e-76
APBA2	1.19016	6.08753	349.06	7.77457e-78	6.31751e-76
ECRG4	3.54115	2.10273	348.963	8.16113e-78	6.61262e-76
CXCL12	-3.34677	1.43311	348.758	9.04182e-78	7.30527e-76
GOLGA8M	-1.87209	4.24926	347.568	1.64076e-77	1.32187e-75
CLSTN2	1.28448	5.73488	346.613	2.64632e-77	2.12593e-75
COTL1	-1.04442	8.02004	344.927	6.15644e-77	4.93178e-75
NT5C3A	-1.46238	4.47451	344.83	6.46099e-77	5.16112e-75
DLL1	-2.40558	2.62517	344.824	6.48225e-77	5.16353e-75
PODXL	1.89503	4.08322	344.792	6.58628e-77	5.23166e-75
MYH9	-0.968626	10.0687	344.503	7.61093e-77	6.02862e-75
PIM1	1.18962	5.82331	344.343	8.2445e-77	6.51223e-75
RIN2	-1.27781	5.64974	343.942	1.00782e-76	7.93847e-75
ANKH	-1.23858	6.01969	343.657	1.16226e-76	9.12956e-75
CHI3L2	3.6764	1.28656	343.564	1.21821e-76	9.54257e-75
CRYBB1	-2.00541	3.88675	342.099	2.53562e-76	1.98073e-74
FGD2	-1.81341	3.45573	340.568	5.45878e-76	4.25243e-74
CPM	1.39954	4.83649	339.195	1.08585e-75	8.43565e-74
TOR1B	-1.26309	5.34632	338.988	1.2043e-75	9.33016e-74
LOC102723996	-1.33277	5.2546	338.881	1.27043e-75	9.81562e-74
CD226	1.7113	4.04786	338.677	1.40691e-75	1.08405e-73
MYO7A	-2.23242	3.29618	338.482	1.55107e-75	1.19188e-73
TRIM2	-1.23011	5.97176	337.877	2.10044e-75	1.60966e-73
TRPM8	-1.21841	5.7807	337.624	2.38409e-75	1.82209e-73
BMP2K	-1.08336	6.92635	336.73	3.72986e-75	2.84294e-73
CPXM1	-3.65262	1.53753	336.642	3.89868e-75	2.96363e-73
JAG1	-1.39541	5.15629	336.613	3.95425e-75	2.99781e-73
XIRP1	1.11233	6.17096	336.579	4.02265e-75	3.04151e-73
ADCY8	1.09385	6.7983	336.146	4.99746e-75	3.76849e-73
STC1	1.59998	4.14663	335.32	7.55544e-75	5.68226e-73
EPOP	1.28277	5.02792	334.664	1.04976e-74	7.87404e-73
ARHGAP27	-1.04086	7.64108	334.613	1.07659e-74	8.05393e-73
S100A8	1.58117	4.04754	334.536	1.11896e-74	8.34882e-73
ZC3H12C	-1.08498	6.75346	333.493	1.88665e-74	1.40397e-72
SP110	-1.0486	7.05908	331.791	4.42367e-74	3.28327e-72
CRABP2	1.09866	6.64729	331.742	4.53493e-74	3.35704e-72
IFIT3	-0.997216	8.19424	331.055	6.39403e-74	4.7209e-72
TWIST1	-1.66777	4.02672	330.975	6.65679e-74	4.9021e-72
ANXA2P2	1.18081	5.97211	330.523	8.34609e-74	6.13015e-72
PPARD	0.993776	8.53376	330.504	8.42587e-74	6.17272e-72
CSK	-1.05643	7.28349	330.361	9.05214e-74	6.61437e-72
SORCS1	-1.49224	4.71443	330.205	9.7894e-74	7.13465e-72
ITM2C	-1.07008	7.36901	329.405	1.46131e-73	1.06228e-71
SPTBN5	-1.7961	3.84326	328.405	2.41089e-73	1.74808e-71
ASPM	-1.41033	5.80394	326.968	4.95178e-73	3.58124e-71
TRIM54	1.3611	4.9019	325.986	8.09809e-73	5.84178e-71
COL4A2	-1.29476	5.37217	325.464	1.05156e-72	7.56641e-71
ARHGEF3	-1.20845	5.72306	325.225	1.18521e-72	8.50641e-71
NUMBL	1.48826	4.53978	324.857	1.42509e-72	1.02022e-70
PDE4B	-1.93421	2.97105	324.586	1.6323e-72	1.16561e-70
RET	-1.20342	5.77405	324.238	1.94348e-72	1.38432e-70
NTRK1	-2.07359	2.83943	324.211	1.97008e-72	1.39975e-70
OAS2	-0.982582	8.439	323.905	2.29617e-72	1.62734e-70
SLC30A3	1.25309	5.36132	323.4	2.95627e-72	2.08994e-70
COL5A3	1.22849	5.427	322.562	4.49794e-72	3.17189e-70
TXNRD1	0.985968	8.41476	322.097	5.67777e-72	3.99393e-70
LINC01605	-3.67248	2.29547	321.566	7.40886e-72	5.1987e-70
SLC1A2	2.52006	2.33176	321.376	8.14684e-72	5.70239e-70
NAMPT	1.01163	7.45783	321.191	8.93833e-72	6.24094e-70
LILRA2	1.15857	6.24366	321.104	9.33466e-72	6.50161e-70
SLC9A1	1.04582	7.0058	320.982	9.92695e-72	6.89716e-70
VIM	0.891325	11.0811	319.746	1.84333e-71	1.27759e-69
LYZ	1.41728	4.65566	318.541	3.37052e-71	2.33035e-69
CHI3L1	0.774618	13.839	318.238	3.92258e-71	2.70543e-69
JADE2	-1.31797	4.9046	318.148	4.10316e-71	2.82309e-69
CYP26B1	2.35523	2.77281	317.966	4.49411e-71	3.08457e-69
IFITM2	-1.0811	6.31577	317.695	5.14728e-71	3.52433e-69
EMILIN2	-0.969121	8.80476	317.391	5.99555e-71	4.09522e-69
FCMR	1.16523	5.84999	315.464	1.57355e-70	1.07222e-68
KIF2C	-1.44321	5.34471	315.291	1.7167e-70	1.16694e-68
NCKAP1	1.15603	5.99171	315.04	1.94663e-70	1.32007e-68
LINC00504	1.12152	6.22331	314.911	2.07657e-70	1.40482e-68
SLFN5	-1.08501	6.21871	313.892	3.45957e-70	2.33484e-68
PLA2G4A	-1.54345	4.35032	313.591	4.02146e-70	2.70759e-68
RASA1	-1.04079	7.3501	313.339	4.56324e-70	3.06506e-68
S100A16	1.1125	6.19919	312.568	6.71403e-70	4.49903e-68
CMYA5	1.3574	4.80513	312.32	7.6007e-70	5.08115e-68
G6PD	1.02079	7.14928	310.917	1.53479e-69	1.0236e-67
LDLRAP1	1.15844	5.71741	310.161	2.24155e-69	1.49145e-67
ARHGAP5	1.67492	3.8919	310.083	2.33132e-69	1.54753e-67
IL1RN	0.885319	10.8457	309.312	3.42963e-69	2.27126e-67
RSAD2	-0.963979	8.07204	309.247	3.54269e-69	2.34066e-67
CCL22	1.15348	5.62802	308.67	4.73036e-69	3.11807e-67
SNTB1	-0.978638	8.00091	308.285	5.73686e-69	3.77272e-67
IFI27	-1.03473	6.34696	306.14	1.68017e-68	1.10237e-66
MYOSLID	2.40473	2.96389	305.722	2.07135e-68	1.35587e-66
TNFSF9	1.82764	3.35656	305.411	2.42104e-68	1.58111e-66
KLHL29	2.55905	2.18028	305.24	2.63779e-68	1.7187e-66
KAT2B	-1.20327	5.46929	305.216	2.66967e-68	1.73547e-66
DMBX1	2.70753	2.0562	303.589	6.02985e-68	3.91083e-66
RAB11FIP4	1.13258	5.91849	302.974	8.20587e-68	5.30997e-66
TNFSF15	2.09821	2.82579	302.464	1.05978e-67	6.84213e-66
GAREM1	-2.30509	3.07674	302.255	1.17656e-67	7.57874e-66
STAT2	-0.9739	7.58919	301.525	1.69593e-67	1.08994e-65
FCRLB	1.8915	3.65254	301.491	1.72544e-67	1.1064e-65
MTARC1	2.03484	3.48069	301.34	1.86081e-67	1.1905e-65
IQGAP2	-1.21542	5.09311	300.441	2.91875e-67	1.86313e-65
PEX5L	-1.81547	3.33422	300.393	2.98995e-67	1.90427e-65
EPB41L4B	2.58987	2.47815	299.862	3.90179e-67	2.47944e-65
PTPRC	-0.93694	8.89962	298.296	8.54915e-67	5.42047e-65
DYRK2	1.17975	5.54482	298.225	8.8611e-67	5.60568e-65
GPSM2	-1.31694	5.41831	297.887	1.04957e-66	6.62495e-65
SH3RF1	-1.35865	4.81927	297.426	1.32195e-66	8.32561e-65
OLFML2B	-3.74117	1.86938	295.705	3.13148e-66	1.96782e-64
GDF15	0.969446	7.61916	295.512	3.44968e-66	2.16297e-64
TDO2	-0.892234	10.0833	295.389	3.66822e-66	2.29491e-64
GOLGA8J	-1.61631	4.5264	294.324	6.25467e-66	3.90441e-64
TPX2	-1.18295	6.22794	293.258	1.067e-65	6.64598e-64
SOX4	-1.13257	5.7573	292.796	1.34492e-65	8.35863e-64
TIAM2	2.05964	2.98538	292.541	1.52838e-65	9.47797e-64
IRS1	1.52844	4.20144	292.469	1.5843e-65	9.80324e-64
CPNE2	-1.03928	7.07751	292.359	1.67436e-65	1.03379e-63
DEF6	-1.13217	5.96648	292.128	1.87943e-65	1.15788e-63
LMO4	0.967577	7.61849	292.075	1.93025e-65	1.1866e-63
IFIH1	-0.961043	7.45135	291.849	2.16224e-65	1.32633e-63
ADARB1	-1.18769	5.64041	289.738	6.22678e-65	3.81127e-63
SLC11A1	1.00514	6.65008	289.433	7.25229e-65	4.42938e-63
FTH1	0.806599	12.0964	288.879	9.57376e-65	5.83463e-63
PUS10	-1.46132	4.4509	288.726	1.03369e-64	6.2862e-63
SCAMP5	-1.53122	4.29273	287.861	1.59454e-64	9.67605e-63
KCNJ2	-1.19436	5.43093	287.845	1.60745e-64	9.7335e-63
CARD16	-1.69142	3.50598	287.74	1.69432e-64	1.02376e-62
C21orf91	-1.19968	5.05392	287.685	1.74161e-64	1.05009e-62
IGF1R	2.06248	3.18138	287.047	2.3977e-64	1.4426e-62
ZNF107	-1.53654	4.25299	286.34	3.41616e-64	2.051e-62
KDR	5.01056	1.166	285.728	4.64232e-64	2.78126e-62
FBLIM1	-2.41533	2.22954	285.368	5.56197e-64	3.32519e-62
PCDH11X	1.93697	3.43582	285.31	5.72562e-64	3.41581e-62
RASAL3	-1.2874	5.06534	285.287	5.79088e-64	3.44746e-62
NCAPG	-1.24177	5.87145	285.188	6.08589e-64	3.61548e-62
CHKA	1.35755	4.72941	285.122	6.29087e-64	3.72941e-62
SERINC5	1.33145	4.78547	284.197	1.00005e-63	5.91618e-62
METTL7A	-1.66319	4.23022	283.769	1.23935e-63	7.31657e-62
HAVCR2	-0.938169	7.98095	283.063	1.76502e-63	1.03982e-61
LINC02392	2.58333	2.52056	282.721	2.09569e-63	1.23205e-61
PPP1R3A	1.04759	6.1023	282.593	2.23391e-63	1.31059e-61
TSPAN14	1.03874	6.46222	282.363	2.50729e-63	1.46793e-61
YOD1	1.15746	5.52557	282.069	2.9056e-63	1.69761e-61
TRDN	-3.48844	2.4395	280.954	5.07844e-63	2.96099e-61
EXTL1	2.70075	2.41243	280.838	5.38351e-63	3.13241e-61
SPIRE1	1.05497	6.11997	279.191	1.22894e-62	7.13595e-61
HMGN2	-0.972112	7.61058	279.058	1.31386e-62	7.61336e-61
GOLGA8R	-1.6163	4.32841	278.788	1.5039e-62	8.69677e-61
BIN1	-1.39874	4.68585	277.91	2.33489e-62	1.34747e-60
SLC25A40	1.22947	5.22938	277.736	2.54779e-62	1.46734e-60
DMKN	4.11859	1.5011	277.279	3.20407e-62	1.84156e-60
KLHL6	-1.01305	6.39628	276.636	4.42191e-62	2.53636e-60
CMKLR1	-2.2093	2.96881	276.529	4.66604e-62	2.67098e-60
BHLHE40	0.955043	7.1073	276.377	5.03558e-62	2.87669e-60
CDK6	-0.938736	7.82284	275.752	6.88801e-62	3.927e-60
CYCS	0.984654	7.04152	275.508	7.78166e-62	4.42756e-60
CTSG	0.977363	6.96116	275.42	8.13416e-62	4.61883e-60
DTX3L	-0.921575	7.93975	275.145	9.33522e-62	5.29021e-60
TRAF3IP3	-1.42576	4.55422	274.545	1.2612e-61	7.13286e-60
SMAP2	-0.883245	9.45575	274.221	1.48383e-61	8.37523e-60
LYPLAL1-AS1	-2.45745	2.1316	273.417	2.21928e-61	1.25013e-59
SAMD9	-0.934349	7.36399	272.438	3.62521e-61	2.03805e-59
PTK7	1.17054	5.04427	272.213	4.05783e-61	2.27673e-59
HIVEP2	-1.13132	5.01919	271.972	4.5797e-61	2.56445e-59
CES1	0.943665	7.40784	271.877	4.80397e-61	2.68472e-59
MYL12B	0.931688	7.70196	271.685	5.28728e-61	2.94899e-59
FTL	0.752491	12.8196	270.697	8.67806e-61	4.83067e-59
GLIPR2	-1.01314	6.31612	270.169	1.1308e-60	6.28225e-59
FADS1	1.08139	6.01368	269.936	1.27053e-60	7.0447e-59
BMP1	0.940588	7.43555	268.711	2.34831e-60	1.29952e-58
STAB1	-3.08376	2.27108	268.474	2.64428e-60	1.46045e-58
SELPLG	-1.36445	4.21867	268.21	3.0182e-60	1.66371e-58
ACOD1	-1.40393	3.61878	267.878	3.56566e-60	1.96167e-58
EEPD1	-1.09111	5.7182	267.559	4.18346e-60	2.29708e-58
RPLP0P2	1.14703	5.22065	266.855	5.95202e-60	3.26185e-58
S1PR3	1.59695	3.81249	266.682	6.49316e-60	3.55152e-58
CFL2	1.4853	4.27058	266.356	7.6461e-60	4.17406e-58
MREG	1.38972	4.15452	265.985	9.20743e-60	5.01672e-58
RHPN1	-1.388	4.38169	265.807	1.0068e-59	5.47507e-58
CORO2B	1.25978	4.81945	265.659	1.08407e-59	5.88396e-58
TGM2	0.881572	8.82379	265.591	1.12184e-59	6.0773e-58
TRPM2	-1.01688	6.26401	265.457	1.19962e-59	6.48623e-58
MINDY2	1.03109	6.25727	265.245	1.33428e-59	7.20051e-58
APLN	5.04987	1.03853	265.047	1.47345e-59	7.93645e-58
DAPP1	-1.18849	4.83607	265.013	1.49922e-59	8.0599e-58
EGR2	0.926354	7.41701	264.441	1.99702e-59	1.07157e-57
SLC38A5	-1.50396	3.97445	264.275	2.17014e-59	1.16226e-57
PRXL2B	1.43686	4.25507	263.913	2.6021e-59	1.39097e-57
INHBB	3.62915	1.31666	263.776	2.78672e-59	1.48685e-57
PLEKHG2	-1.00456	6.31386	263.327	3.48979e-59	1.85846e-57
TEP1	-1.04741	5.89289	262.221	6.07546e-59	3.22936e-57
PTPRE	0.911311	7.64253	262.037	6.66219e-59	3.53458e-57
RAB1A	0.892491	8.17229	261.972	6.88228e-59	3.64451e-57
PMEPA1	2.48387	2.23823	260.311	1.58262e-58	8.36513e-57
C2	-0.859239	9.33262	259.674	2.17894e-58	1.14955e-56
TXN	0.909103	7.76273	259.594	2.26723e-58	1.1939e-56
CTSK	1.56989	3.7978	258.903	3.20592e-58	1.68508e-56
RCAN2	1.86807	3.03699	258.499	3.92557e-58	2.05951e-56
CELSR1	-1.0196	6.3452	258.244	4.46241e-58	2.33682e-56
STAMBPL1	-2.54008	1.85851	257.342	7.01297e-58	3.66567e-56
ACO1	1.1524	5.49977	257.274	7.25567e-58	3.78553e-56
PARP12	-0.989101	6.02144	256.91	8.70828e-58	4.53504e-56
SLC6A8	1.02018	5.88323	256.693	9.70968e-58	5.04725e-56
CELF2	-0.934893	7.2782	255.808	1.51332e-57	7.85207e-56
OAS3	-0.849566	9.48281	255.538	1.73232e-57	8.97191e-56
ABCA13	-2.04558	3.00442	255.319	1.93338e-57	9.99492e-56
LINC01181	1.56343	3.51816	254.434	3.01408e-57	1.55533e-55
DIRC3	2.14306	2.98248	254.263	3.2834e-57	1.69122e-55
GIMAP4	-1.76009	2.95508	254.229	3.33962e-57	1.71705e-55
SLC38A2	0.892442	7.87489	254.199	3.39034e-57	1.73997e-55
CCRL2	1.23819	4.52412	253.445	4.94866e-57	2.53511e-55
CCNB1	-1.14961	5.8543	253.409	5.03769e-57	2.57605e-55
LRP1	-0.887133	8.05525	253.354	5.18012e-57	2.64411e-55
PNPT1	-0.932108	6.83022	252.653	7.36109e-57	3.75057e-55
CORO1A	-0.862048	9.00131	252.626	7.46163e-57	3.79496e-55
CALCOCO1	0.979084	6.09912	252.363	8.51137e-57	4.32109e-55
RHOBTB2	0.960783	6.68325	251.456	1.34177e-56	6.79977e-55
VASH1	0.968121	6.9318	251.213	1.51544e-56	7.66611e-55
SHFL	-0.975232	6.0228	249.922	2.8945e-56	1.46162e-54
LZTS1	-1.47033	4.18832	249.363	3.83231e-56	1.93173e-54
P2RY6	-1.46179	3.88354	249.307	3.94036e-56	1.98266e-54
CD4	-0.95399	6.79228	248.906	4.81771e-56	2.41981e-54
LILRB4	0.865514	8.25778	248.876	4.89243e-56	2.45298e-54
XRN1	-0.910847	6.96658	248.601	5.61514e-56	2.81035e-54
LOC100128993	-4.14128	1.01969	248.564	5.72012e-56	2.85784e-54
TANK	-0.953611	6.27677	247.944	7.8046e-56	3.89239e-54
PDCD1LG2	-1.38628	3.91004	247.534	9.58581e-56	4.77231e-54
BCR	0.960187	6.44572	246.899	1.31837e-55	6.54839e-54
LILRB3	1.01758	5.45728	246.896	1.31996e-55	6.54839e-54
BST2	-0.862944	8.23962	246.699	1.45709e-55	7.21602e-54
ARRDC3	-1.0845	5.27215	246.249	1.8258e-55	9.02621e-54
MRPL37	0.938656	6.84149	245.935	2.1376e-55	1.05492e-53
EPB41L3	-1.62892	3.31967	245.822	2.26186e-55	1.1143e-53
G0S2	1.02839	5.41828	244.599	4.17715e-55	2.05429e-53
TK1	-1.16038	5.58437	244.49	4.41208e-55	2.16605e-53
ATXN1	1.16538	5.04326	244.32	4.80568e-55	2.3552e-53
TM6SF1	1.54507	3.98855	243.659	6.6922e-55	3.27408e-53
TNFRSF21	0.89139	7.54821	243.567	7.01011e-55	3.42369e-53
SNX9	0.867907	8.0181	243.393	7.6498e-55	3.72967e-53
SEPTIN11	1.00883	6.17467	243.327	7.90521e-55	3.84756e-53
FAM53B	1.03346	5.75572	243.202	8.41528e-55	4.08878e-53
DLL4	-3.55074	0.490329	243.035	9.15385e-55	4.44001e-53
CNP	-0.876185	7.6127	242.703	1.08124e-54	5.23552e-53
FGL2	1.02202	5.59524	242.694	1.08569e-54	5.24807e-53
BCL2L11	-1.16852	4.94118	242.292	1.32812e-54	6.40899e-53
SNAI3	1.27554	4.53736	242.233	1.36863e-54	6.59321e-53
HOMER2	-1.69774	3.9527	241.448	2.02806e-54	9.75331e-53
SLC2A5	-1.57284	3.56439	241.226	2.26744e-54	1.0886e-52
SMAD3	-2.21891	3.00429	240.843	2.74711e-54	1.31666e-52
TRIM24	1.01666	5.79674	240.835	2.75888e-54	1.31987e-52
HEY2	-3.91622	2.04285	240.832	2.76316e-54	1.31987e-52
STAP1	-2.57746	1.60632	240.617	3.07797e-54	1.46777e-52
IL3RA	-1.10442	4.85631	240.41	3.41478e-54	1.62564e-52
POLE4	1.15692	5.04036	240.293	3.62049e-54	1.72067e-52
PLSCR4	-2.77535	1.22902	239.723	4.81757e-54	2.28576e-52
SLC27A3	0.981366	5.86166	239.122	6.51478e-54	3.08585e-52
ZWINT	-1.10029	5.92486	238.992	6.95331e-54	3.28806e-52
DENND3	-0.977259	5.96603	238.803	7.64197e-54	3.60767e-52
LOC606724	-1.3525	4.45708	238.456	9.09863e-54	4.28818e-52
LTBP1	-1.77751	3.71427	238.158	1.05633e-53	4.97021e-52
PPBP	1.96938	2.70655	237.899	1.20296e-53	5.65073e-52
GSDMD	-0.868507	7.50401	237.141	1.75901e-53	8.24899e-52
ZC3H11B	-1.22688	4.59755	237.015	1.87429e-53	8.77503e-52
GFI1	-1.27109	4.70101	236.668	2.23067e-53	1.04263e-51
RGCC	0.902217	6.92544	236.215	2.79847e-53	1.30586e-51
PCSK5	1.8852	2.88405	236.143	2.90208e-53	1.35198e-51
ARHGAP31	0.945714	6.24236	235.637	3.74125e-53	1.74005e-51
GOLGA8Q	-2.20434	2.95099	235.24	4.5652e-53	2.11978e-51
CDS1	2.19352	2.53327	234.593	6.31538e-53	2.92765e-51
NLRP3	-0.916869	6.5412	233.601	1.03878e-52	4.80763e-51
SREBF1	0.953353	6.1398	232.816	1.53996e-52	7.11552e-51
NPC1	0.863276	7.44081	231.676	2.7276e-52	1.25826e-50
PTK2	1.23106	4.68248	231.559	2.89207e-52	1.33195e-50
ZNF516	-1.09791	5.15204	230.496	4.92918e-52	2.26646e-50
YEATS2	-0.95908	6.01186	230.394	5.18835e-52	2.38175e-50
GNB4	-0.932276	6.44013	230.236	5.61759e-52	2.57462e-50
PTK2B	-0.812492	9.29086	230.112	5.97893e-52	2.73579e-50
GIMAP2	-1.17981	4.52784	229.995	6.33853e-52	2.89565e-50
LRRC8B	1.13096	4.98052	229.981	6.3831e-52	2.91131e-50
OASL	-0.905852	6.14168	229.547	7.93636e-52	3.61392e-50
LINC01094	-1.3119	4.30262	229.186	9.51026e-52	4.32365e-50
LCP2	-0.87838	6.92479	229.149	9.69042e-52	4.39848e-50
SLC25A23	0.976399	5.99754	228.933	1.07999e-51	4.89421e-50
SLC2A3	1.0325	5.47426	228.725	1.19897e-51	5.42474e-50
FAM225A	-0.893297	6.55858	228.298	1.48504e-51	6.70832e-50
BUB1	-1.14234	5.65167	228.287	1.49319e-51	6.73434e-50
SLC2A4RG	-1.06877	5.60776	227.778	1.9278e-51	8.68061e-50
ZNF385B	-7.27945	0.748915	227.707	1.99764e-51	8.98079e-50
PYGL	0.969958	6.13999	227.467	2.25268e-51	1.01113e-49
THRA	1.14674	4.82379	227.357	2.3815e-51	1.06726e-49
CEBPB	0.879116	6.84303	227.308	2.44017e-51	1.09182e-49
DROSHA	-1.05452	5.38112	227.291	2.46105e-51	1.09943e-49
AKNA	-1.02406	5.76274	226.801	3.14629e-51	1.40333e-49
FES	-1.3022	4.39298	226.788	3.1672e-51	1.41043e-49
ARC	2.05131	2.64378	226.712	3.29125e-51	1.46336e-49
TMSB4X	-0.791355	9.87324	226.703	3.30556e-51	1.46742e-49
MACF1	-0.874047	7.32586	226.438	3.77586e-51	1.67357e-49
ITSN1	-1.06813	5.23801	226.315	4.01557e-51	1.77703e-49
BRCA1	-1.09784	5.75898	226.13	4.40676e-51	1.9471e-49
ATP6V1H	0.857073	7.41596	225.993	4.71901e-51	2.08181e-49
ACER2	1.7414	3.16133	225.51	6.01477e-51	2.64931e-49
PLSCR1	-0.836362	7.7456	225.245	6.8699e-51	3.02126e-49
SLC35F2	1.1007	5.03848	224.514	9.91433e-51	4.35338e-49
PRXL2A	0.97347	5.88523	224.47	1.01338e-50	4.44283e-49
APOBEC3B	-1.65619	3.8096	224.39	1.05479e-50	4.61724e-49
TKT	0.841118	7.91274	224.335	1.08433e-50	4.73921e-49
LGALS3BP	-0.843543	7.44532	223.953	1.3134e-50	5.73154e-49
MPRIP	-0.890164	7.08503	223.448	1.69235e-50	7.37383e-49
ZFP36L1	-0.826605	8.19098	223.149	1.96642e-50	8.55485e-49
NPAS2	-1.85293	3.61834	223.038	2.07917e-50	9.03144e-49
SYT3	1.30202	4.20512	222.652	2.52267e-50	1.09411e-48
SLC19A2	1.25957	4.33381	222.47	2.76418e-50	1.19702e-48
LOC105375690	2.09927	2.21019	222.136	3.26928e-50	1.41359e-48
SERPINA1	1.03596	5.35882	221.635	4.20323e-50	1.81464e-48
ANTXR1	-1.22235	5.48239	221.532	4.42468e-50	1.90733e-48
FAM225B	-0.88715	6.41019	220.888	6.11498e-50	2.63195e-48
TYMS	-1.06754	6.07915	220.042	9.34824e-50	4.01747e-48
SPAG5	-1.11672	5.68096	219.963	9.72457e-50	4.17286e-48
IFITM10	0.955777	5.72614	219.935	9.86122e-50	4.22508e-48
PPARGC1B	0.944386	5.94361	219.753	1.08071e-49	4.62333e-48
TSPAN5	1.24453	4.47974	219.423	1.27502e-49	5.44638e-48
MALT1	-0.911689	6.1786	219.104	1.49617e-49	6.38139e-48
MGLL	0.824161	7.88235	219.084	1.51129e-49	6.4362e-48
IFNAR2	-0.915443	6.21554	218.889	1.66671e-49	7.08741e-48
PAX5	-1.93855	2.07896	218.596	1.9309e-49	8.1985e-48
ATG9A	0.90988	6.42594	218.263	2.28186e-49	9.67414e-48
TPRG1L	-1.15731	4.77733	218.254	2.29227e-49	9.70372e-48
MAP3K9	2.32013	1.98793	218.142	2.42434e-49	1.02475e-47
KLF6	-0.843163	7.28815	217.938	2.68679e-49	1.13398e-47
FZD6	-1.17492	4.84974	217.735	2.97456e-49	1.25357e-47
GOLGA8O	-1.28578	4.78698	217.616	3.1568e-49	1.32839e-47
RMDN3	0.909078	6.32218	216.943	4.42504e-49	1.85931e-47
BATF2	-0.992244	5.07383	216.817	4.71534e-49	1.97834e-47
PRC1	-1.03244	6.14804	216.703	4.99153e-49	2.09112e-47
CNDP2	-0.824777	7.69455	216.571	5.33319e-49	2.23095e-47
LYN	-0.812617	8.02354	216.551	5.3889e-49	2.25092e-47
UBE2Q2	-1.10283	5.11391	216.286	6.15325e-49	2.56639e-47
TNS1	0.909023	6.36736	215.694	8.28357e-49	3.44982e-47
SLC44A2	1.31697	4.09256	215.439	9.41363e-49	3.91469e-47
TCF12	-0.834285	7.74161	215.364	9.77656e-49	4.05964e-47
ANXA5	0.782844	9.39944	214.79	1.30398e-48	5.40672e-47
TGFB3	-1.26816	4.01045	214.749	1.33063e-48	5.50918e-47
SYP	1.32645	4.07313	214.559	1.46427e-48	6.0536e-47
PKM	0.722239	11.2473	214.181	1.77e-48	7.30687e-47
DENND2D	1.03711	5.18862	214.01	1.928e-48	7.94754e-47
SYNE1	-1.84973	3.62518	213.331	2.71117e-48	1.11596e-46
RUNX1	-0.902023	6.36335	213.242	2.83538e-48	1.16539e-46
NTN1	-3.14614	0.884427	213.235	2.84466e-48	1.16751e-46
TCTEX1D1	-0.903486	6.49516	213.076	3.08128e-48	1.26279e-46
KBTBD11	0.926787	6.10491	213.047	3.12662e-48	1.27951e-46
RAB8B	-0.874168	6.54163	212.398	4.33034e-48	1.76956e-46
CXorf21	-1.37683	3.9224	211.228	7.78918e-48	3.17839e-46
ATP9A	0.883972	6.58284	211.026	8.62239e-48	3.51332e-46
DNMT1	-0.875066	6.99629	210.642	1.04557e-47	4.25421e-46
ABCD1	0.828184	7.24	210.174	1.32212e-47	5.3717e-46
VGLL2	-5.26191	-0.106716	209.815	1.58288e-47	6.42192e-46
ITGAL	-0.894812	6.39274	209.481	1.87194e-47	7.58377e-46
CREB3L2	-0.91342	6.10828	209.34	2.00967e-47	8.13011e-46
GBP3	-0.855137	6.4527	208.591	2.92622e-47	1.18211e-45
ME2	-0.880023	6.39117	208.342	3.31669e-47	1.33794e-45
RHEX	-3.47728	1.10939	207.79	4.37539e-47	1.7625e-45
ALDH9A1	0.914274	6.26602	207.63	4.74027e-47	1.90676e-45
XKRX	1.16397	4.60731	207.472	5.13094e-47	2.06097e-45
BIRC5	-1.12017	5.61316	207.243	5.75668e-47	2.30904e-45
FLI1	-0.984547	5.60088	207.076	6.2608e-47	2.50769e-45
ARHGAP18	-0.807135	7.96307	206.974	6.58836e-47	2.63516e-45
LMNB1	-0.895531	6.54365	206.868	6.94979e-47	2.77579e-45
TTC9	2.82137	1.29005	206.835	7.0648e-47	2.81775e-45
COL22A1	-0.867593	6.36593	206.429	8.66201e-47	3.44992e-45
LILRB1	0.923676	5.93178	206.236	9.54537e-47	3.7964e-45
ADORA2B	1.38541	3.64028	205.931	1.11201e-46	4.41649e-45
MX1	-0.828196	6.82572	205.772	1.2047e-46	4.77789e-45
C6orf223	1.39611	3.90094	205.252	1.56403e-46	6.19433e-45
GJA1	-2.62506	1.77346	203.877	3.1187e-46	1.23344e-44
KANK4	2.12266	1.83382	203.718	3.37804e-46	1.33414e-44
PLK1	-1.23458	5.08727	203.592	3.59749e-46	1.41883e-44
MXD1	-0.861652	6.04041	203.258	4.25459e-46	1.67565e-44
TCF19	-0.900961	6.90555	202.912	5.06282e-46	1.99119e-44
PAQR5	0.831328	7.16063	202.607	5.8989e-46	2.31679e-44
H2AZ1	-0.824377	7.6235	202.433	6.43735e-46	2.52476e-44
APOBEC3F	-1.28817	3.84478	202.293	6.90837e-46	2.70574e-44
EPSTI1	-0.801756	7.35408	202.276	6.96661e-46	2.72478e-44
GRAMD4	-0.928674	5.9442	201.688	9.35901e-46	3.65544e-44
GALNT1	0.838411	7.09854	201.526	1.01524e-45	3.95985e-44
GSR	0.935701	5.95306	201.391	1.08623e-45	4.23092e-44
FNDC3A	-0.792717	7.92064	201.38	1.09242e-45	4.24915e-44
RSPO3	1.91165	2.12042	201.147	1.2278e-45	4.76919e-44
GOLGA7	0.831637	7.02657	201.073	1.27414e-45	4.9424e-44
METRNL	-0.79059	7.82302	200.484	1.71252e-45	6.63379e-44
EML4	-0.849854	6.75808	200.402	1.78455e-45	6.90336e-44
SLC28A3	2.37478	1.7493	200.279	1.89818e-45	7.33287e-44
SH3PXD2B	-0.906559	5.86809	200.193	1.98168e-45	7.64503e-44
ARL13B	-1.51356	3.55473	199.944	2.24613e-45	8.65341e-44
ATP13A3	0.75232	9.48696	199.909	2.2854e-45	8.79272e-44
CAMKK2	-0.998349	5.28188	198.923	3.74912e-45	1.44046e-43
HELZ2	-0.763162	8.50086	197.997	5.96827e-45	2.28997e-43
GTSE1	-1.4809	4.48208	197.656	7.08513e-45	2.71482e-43
SHE	2.39458	1.77167	197.455	7.83783e-45	2.99916e-43
ALDH1A2	1.50566	3.46044	197.339	8.30704e-45	3.17441e-43
PARP10	-0.776971	7.92843	196.898	1.03671e-44	3.95627e-43
TMEM189	0.905036	5.84027	196.865	1.05356e-44	4.01518e-43
STING1	-1.03959	5.30475	196.536	1.24278e-44	4.72994e-43
CCR2	-2.47808	2.32167	196.486	1.27459e-44	4.84446e-43
NANOS1	2.74145	1.50228	196.416	1.32001e-44	5.01035e-43
CENPE	-1.33375	4.79229	196.31	1.39216e-44	5.27716e-43
RIN3	1.02527	5.01488	196.238	1.4434e-44	5.46404e-43
MSMO1	0.803959	7.36046	196.046	1.5902e-44	6.01171e-43
PGGHG	-1.47869	3.33671	195.964	1.65687e-44	6.2554e-43
POP4	0.90746	5.82859	195.915	1.69791e-44	6.40179e-43
CNR1	0.80426	7.26692	195.8	1.79928e-44	6.77495e-43
CYP51A1	0.816734	7.11778	195.768	1.828e-44	6.87394e-43
NUMB	0.758264	8.75258	195.652	1.93748e-44	7.27597e-43
ANTXR2	-0.796947	7.43135	194.269	3.88091e-44	1.45549e-42
CASP4	-0.845181	6.24522	194.031	4.37264e-44	1.63774e-42
CLSTN3	-0.918589	5.60409	193.996	4.44979e-44	1.66443e-42
HMGA1	0.719895	10.1516	193.725	5.09864e-44	1.90461e-42
GRK6	0.887256	6.13583	193.528	5.62856e-44	2.09979e-42
SSH1	-0.907751	5.74679	193.134	6.86018e-44	2.55589e-42
CLIC1	-0.666435	11.831	192.849	7.91433e-44	2.94476e-42
MIR503HG	-1.51637	3.01624	192.371	1.00651e-43	3.74008e-42
SAMD9L	-0.766544	7.90624	192.25	1.06936e-43	3.96841e-42
ATP2B4	0.75559	8.72517	192.239	1.07504e-43	3.98427e-42
CDCA2	-1.20592	4.95473	192.196	1.09888e-43	4.06728e-42
AP1S1	0.860405	6.32018	192.154	1.12192e-43	4.14714e-42
SRC	-0.838554	6.06121	192.035	1.19107e-43	4.39699e-42
ZNF366	1.22031	4.3448	191.174	1.83578e-43	6.7682e-42
STXBP5	0.813675	6.94925	191.061	1.94314e-43	7.15471e-42
DHX58	-0.937196	5.18389	190.923	2.08264e-43	7.65836e-42
FANCD2	-1.1587	5.07221	190.68	2.35254e-43	8.63964e-42
SLC6A12	1.68992	2.8947	190.544	2.51819e-43	9.23598e-42
RICTOR	-0.894623	5.63034	190.135	3.09305e-43	1.13297e-41
PRR11	-1.05081	5.66212	190.052	3.225e-43	1.17977e-41
ADGRB1	1.28757	4.07252	189.902	3.47694e-43	1.2703e-41
IFITM3	-0.758738	7.9937	189.835	3.59645e-43	1.31226e-41
MYEOV	0.983238	4.89342	189.602	4.04276e-43	1.47321e-41
CDA	2.92597	1.4248	189.542	4.16585e-43	1.51611e-41
DAG1	0.781966	7.50488	189.336	4.62046e-43	1.6794e-41
CDK1	-1.07478	5.5324	189.219	4.90068e-43	1.77897e-41
MBNL1-AS1	-1.43102	3.8642	188.908	5.72649e-43	2.07607e-41
PCDHAC2	-1.76298	2.66235	188.736	6.24424e-43	2.26088e-41
NCF4	-0.819341	6.89696	188.543	6.87856e-43	2.48736e-41
DOCK8-AS1	-3.68597	0.670639	188.517	6.9713e-43	2.51768e-41
INPP4B	-1.35209	4.48604	188.405	7.3741e-43	2.65975e-41
PLAGL1	-0.918562	5.35	188.324	7.67968e-43	2.76645e-41
ABCC6	-0.825368	6.37008	188.257	7.94185e-43	2.85725e-41
H1-0	-0.777265	7.60778	187.632	1.08734e-42	3.90695e-41
EPG5	0.896939	5.61804	187.535	1.14124e-42	4.09542e-41
EPS8	0.986555	5.23763	187.532	1.14307e-42	4.0968e-41
FCGRT	-0.753425	8.26682	187.361	1.24591e-42	4.45973e-41
MYO1E	-0.74268	8.71621	186.917	1.55718e-42	5.56686e-41
C1GALT1	-1.17646	4.28414	186.903	1.56771e-42	5.59745e-41
RUFY4	-3.16549	0.426585	186.357	2.06252e-42	7.35486e-41
APBA1	1.84782	2.80419	186.226	2.20269e-42	7.84479e-41
CCL5	0.733369	8.9388	185.935	2.54907e-42	9.06701e-41
USP25	-0.894455	5.58838	185.874	2.62857e-42	9.33803e-41
TRPM4	-0.910366	5.53067	185.854	2.65556e-42	9.42208e-41
FADS3	0.923963	5.40543	185.655	2.93485e-42	1.04e-40
FAM72C	-1.15513	4.73887	185.574	3.05553e-42	1.0814e-40
ATP1B3	0.751976	8.18667	185.478	3.20757e-42	1.1338e-40
PCMT1	0.80986	6.96459	185.288	3.52802e-42	1.24551e-40
MEAT6	3.54435	1.00459	185.035	4.00648e-42	1.41266e-40
GRASP	1.49025	3.05787	184.519	5.19082e-42	1.82797e-40
EXT1	1.18708	4.42298	184.29	5.82511e-42	2.04879e-40
FFAR3	-7.04732	0.092541	184.176	6.16701e-42	2.16634e-40
CCDC162P	1.02973	4.95962	184.012	6.69635e-42	2.34937e-40
LINC00622	1.56221	3.14881	183.392	9.14275e-42	3.2037e-40
PDP2	0.98988	5.10724	183.189	1.01284e-41	3.54468e-40
ADAMTS8	-1.04201	4.8217	183.079	1.07007e-41	3.74034e-40
BASP1	0.846122	5.93315	183.072	1.07378e-41	3.74867e-40
MAST4	-1.11353	4.31582	183.054	1.08391e-41	3.77939e-40
PLEKHA3	-1.34993	3.77617	182.991	1.11869e-41	3.89586e-40
CD36	-0.749638	8.00409	182.928	1.15418e-41	4.0145e-40
DAB2	0.759207	7.74417	182.868	1.18976e-41	4.13318e-40
MSC	0.835079	5.95251	182.76	1.25637e-41	4.35922e-40
LTBP2	0.795058	7.11279	182.711	1.28724e-41	4.46086e-40
NUP210	-0.794244	7.30902	182.353	1.54134e-41	5.33488e-40
PDGFRA	1.25225	3.92859	181.085	2.91412e-41	1.0074e-39
IL6R	0.744238	8.01001	180.848	3.28214e-41	1.13324e-39
CD9	0.83069	6.40743	180.638	3.64733e-41	1.25779e-39
STXBP1	0.917773	5.46331	180.111	4.75305e-41	1.63711e-39
TRAFD1	-0.81615	6.08387	179.885	5.3228e-41	1.83112e-39
CERCAM	-1.04997	4.74207	179.724	5.77099e-41	1.98289e-39
USP12	0.777313	7.10469	179.174	7.60976e-41	2.61152e-39
UBA6	-0.8088	6.46382	178.991	8.34223e-41	2.85941e-39
AKR1C1	3.33742	1.03645	178.606	1.0121e-40	3.46491e-39
ABHD2	0.732874	8.63187	178.59	1.02033e-40	3.48886e-39
DOP1A	-1.05255	4.45497	177.665	1.62389e-40	5.54593e-39
PSAP	0.666605	10.9309	177.635	1.64881e-40	5.62427e-39
BLVRB	0.991699	4.84263	177.619	1.66233e-40	5.66352e-39
LYSMD2	-1.30307	3.70467	177.243	2.0072e-40	6.83028e-39
ZBTB7C	1.39429	3.5118	176.984	2.28646e-40	7.77122e-39
UNC93B1	-0.766963	7.07342	176.96	2.31361e-40	7.85404e-39
GBE1	0.835016	6.27628	176.569	2.81675e-40	9.55062e-39
TMEM62	-0.913483	5.21035	176.285	3.24791e-40	1.09993e-38
MTSS2	-1.09373	4.67363	175.883	3.97481e-40	1.3445e-38
IL12RB1	-1.16182	3.90588	175.519	4.77266e-40	1.61244e-38
PPFIBP1	-0.840857	6.19539	175.238	5.49765e-40	1.85516e-38
HERC6	-0.804223	6.14095	174.985	6.24179e-40	2.10376e-38
KCNIP2	-1.91623	2.24134	174.946	6.36576e-40	2.14299e-38
SCARF1	-1.25262	3.35004	174.123	9.62383e-40	3.23594e-38
SLC29A1	0.80986	6.58645	173.945	1.0524e-39	3.53441e-38
HCAR3	2.00466	1.42427	173.882	1.0863e-39	3.64393e-38
TBX21	1.27509	3.3748	173.048	1.6517e-39	5.53398e-38
FAM102A	1.06398	4.60249	173.023	1.67256e-39	5.59723e-38
ATP6V1A	0.761133	7.1251	173.015	1.67941e-39	5.61353e-38
AOX1	2.26825	1.96494	172.8	1.87157e-39	6.24845e-38
ICAM1	-0.710582	8.54281	172.744	1.92479e-39	6.41853e-38
RRM2	-0.858527	6.55734	172.683	1.98424e-39	6.60899e-38
FAM107B	-0.764206	6.99634	172.614	2.05427e-39	6.83419e-38
PIP4K2A	-0.790629	6.69679	172.6	2.06939e-39	6.87639e-38
PDE3B	0.964494	5.08564	172.478	2.20009e-39	7.30212e-38
PLCB2	0.729493	8.14996	172.449	2.23253e-39	7.40111e-38
CDC42	-0.747183	7.5313	172.173	2.56417e-39	8.49059e-38
BTG2	0.718503	8.22226	171.888	2.95897e-39	9.7864e-38
NFKBIA	-0.775089	6.29382	171.754	3.16552e-39	1.04573e-37
AKR1B1	0.834234	6.1472	171.46	3.66955e-39	1.21082e-37
CIITA	-0.969258	4.57793	171.288	4.00111e-39	1.31869e-37
SIGLEC16	-1.69663	2.78527	171.261	4.05453e-39	1.33474e-37
RIN1	-1.10656	4.3877	171.216	4.14774e-39	1.36384e-37
UBTD1	0.8667	5.57796	171.151	4.28646e-39	1.40781e-37
KLHL21	0.904943	5.16732	171.045	4.51916e-39	1.48252e-37
NMI	-0.810434	5.99143	170.957	4.72336e-39	1.54771e-37
TBC1D5	-0.84004	6.01954	170.858	4.96522e-39	1.62507e-37
EDNRA	-4.13314	1.41827	170.687	5.41081e-39	1.76887e-37
KIF20A	-1.35502	4.52978	170.66	5.48535e-39	1.79116e-37
ANKFY1	-0.791898	6.35823	170.504	5.93077e-39	1.93438e-37
APBB1IP	-0.837128	6.20865	170.486	5.98633e-39	1.95025e-37
APLP2	0.65269	10.9414	170.429	6.15936e-39	2.00431e-37
RCN3	-1.65562	2.9071	170.405	6.23541e-39	2.02672e-37
RBCK1	-0.757856	6.93212	170.149	7.09004e-39	2.30186e-37
ANKRD22	-0.938405	4.6782	170.138	7.13033e-39	2.31229e-37
LDLR	0.787537	6.46989	170.075	7.35777e-39	2.38331e-37
DEPDC1B	-1.49349	4.15513	170.055	7.4345e-39	2.40541e-37
GPR35	-1.72455	2.30766	169.688	8.93815e-39	2.8886e-37
TNFAIP8L3	-0.788902	6.85742	169.459	1.00279e-38	3.23707e-37
ENDOD1	-0.946352	4.79797	169.379	1.04425e-38	3.36709e-37
PCLAF	-1.24765	4.71489	169.021	1.24958e-38	4.02456e-37
MELK	-1.07915	5.17531	168.923	1.31301e-38	4.22405e-37
FAM72A	-1.03251	4.95241	168.689	1.47706e-38	4.7464e-37
STIL	-1.24153	4.48474	168.588	1.55352e-38	4.98643e-37
LINC00599	1.41101	3.32841	168.564	1.5722e-38	5.04065e-37
RNF213	-0.689983	9.36513	168.221	1.86823e-38	5.983e-37
FKBP9	-0.999708	4.99618	167.927	2.16554e-38	6.92729e-37
BUB1B	-1.03449	5.54687	167.714	2.41041e-38	7.70187e-37
DOK3	0.789997	6.53053	167.602	2.55039e-38	8.13996e-37
CCL4L2	-1.10501	3.62556	167.428	2.78316e-38	8.87286e-37
ADCY7	-0.816641	6.29009	167.377	2.85574e-38	9.09399e-37
LSP1	0.759767	6.66721	166.644	4.1271e-38	1.31278e-36
SDC2	-0.675508	9.86309	166.484	4.47264e-38	1.42109e-36
LAMC2	1.69492	2.7014	166.265	4.99332e-38	1.58475e-36
NAF1	1.17561	4.05757	166.047	5.57166e-38	1.76632e-36
RGS3	-0.95969	5.11904	165.944	5.869e-38	1.8585e-36
CTTN	0.775607	6.4379	165.793	6.33165e-38	2.00275e-36
HES2	4.46099	-0.136241	165.746	6.48197e-38	2.04801e-36
EVC	0.787598	6.34436	165.561	7.11374e-38	2.24512e-36
EXD3	-1.73326	2.66283	164.858	1.01257e-37	3.19214e-36
FRMD4B	-0.901786	5.37482	164.555	1.17921e-37	3.71331e-36
GPR183	-1.20138	4.22998	164.552	1.1812e-37	3.71546e-36
ATP1A1	0.662916	10.1655	164.189	1.41746e-37	4.45365e-36
PLK4	-1.45259	4.09204	163.774	1.74628e-37	5.48072e-36
SIGLEC11	-1.50824	2.99221	163.65	1.85886e-37	5.82758e-36
IL10RA	-0.752331	6.47705	163.612	1.89484e-37	5.9338e-36
HCAR2	2.29019	0.982393	163.357	2.15386e-37	6.73747e-36
NQO1	0.715641	7.94076	163.354	2.1568e-37	6.73922e-36
SP100	-0.722192	7.44016	163.314	2.20087e-37	6.86934e-36
SYTL3	-0.818906	5.55646	163.027	2.54178e-37	7.92464e-36
PLCD3	1.49752	3.29249	162.836	2.79893e-37	8.71675e-36
RHBDF1	0.846319	5.58738	162.796	2.85591e-37	8.88442e-36
FBN2	0.918467	5.45089	162.658	3.05982e-37	9.50832e-36
PLK3	0.812403	5.5238	162.565	3.20613e-37	9.95201e-36
FER1L6	1.46343	3.12152	162.244	3.76935e-37	1.16875e-35
TTK	-1.12548	5.10859	162.108	4.03568e-37	1.24996e-35
SYT2	-2.41758	2.06277	161.943	4.38463e-37	1.35655e-35
VAT1	0.715306	7.85218	161.322	5.98924e-37	1.85097e-35
HEXIM1	0.812098	5.86331	161.145	6.54816e-37	2.02149e-35
TNPO1	0.691523	8.68755	161.088	6.7379e-37	2.0778e-35
OVCH1-AS1	5.30291	-0.10603	160.953	7.21261e-37	2.22177e-35
SC5D	0.858568	5.67023	160.93	7.29582e-37	2.24495e-35
RUNX3	-0.736956	6.9611	160.624	8.5103e-37	2.61581e-35
NIBAN2	0.651864	10.2637	160.551	8.82748e-37	2.71035e-35
UST	-1.03022	5.13153	160.397	9.53555e-37	2.92458e-35
MAP3K2	0.774705	6.46819	160.384	9.59767e-37	2.94044e-35
ARHGAP11A	-0.800333	6.66017	159.992	1.16932e-36	3.57859e-35
ABCG2	1.37877	3.29191	159.97	1.18211e-36	3.61381e-35
RAB3B	3.58411	0.860012	159.901	1.2237e-36	3.73692e-35
CD74	-0.675588	9.09358	159.88	1.23675e-36	3.77269e-35
MYBL2	-0.876299	6.2106	159.356	1.60942e-36	4.90422e-35
TRIM5	-0.976167	4.57225	159.155	1.78071e-36	5.42034e-35
POLA1	-1.27125	4.31731	159.035	1.89103e-36	5.74996e-35
EGR1	-0.847444	5.3672	158.452	2.53601e-36	7.70283e-35
IGLON5	-3.36453	1.27938	158.448	2.54006e-36	7.70686e-35
AQP3	1.46831	3.154	157.925	3.30407e-36	1.00142e-34
LRFN5	-1.21089	3.40211	157.804	3.51291e-36	1.06358e-34
BRCA2	-1.10178	4.57225	157.779	3.55588e-36	1.07544e-34
GTPBP2	-0.724203	7.0612	157.708	3.68611e-36	1.11363e-34
FASN	0.681316	8.75985	157.705	3.69054e-36	1.11378e-34
F2R	-2.2403	1.86557	157.697	3.70584e-36	1.11721e-34
IRF2BPL	-0.800833	5.8406	157.457	4.18132e-36	1.25921e-34
NID1	-0.92313	5.22203	157.237	4.67053e-36	1.40504e-34
NISCH	-0.787481	6.31154	157.027	5.19179e-36	1.56018e-34
CIAO1	0.718491	7.38459	156.916	5.48956e-36	1.64792e-34
KIF4A	-1.09237	5.05513	156.604	6.42195e-36	1.92577e-34
SLC37A2	0.69767	7.98841	156.593	6.45763e-36	1.93441e-34
GBP5	-0.6746	8.59597	156.4	7.11527e-36	2.12916e-34
CERS4	0.944756	4.93642	156.279	7.56035e-36	2.25995e-34
LGR4	1.29185	3.75712	156.215	7.80711e-36	2.33125e-34
ARID4B	-0.754547	6.45683	155.931	9.0047e-36	2.68602e-34
AK1	0.773907	6.21364	155.635	1.04511e-35	3.11418e-34
NUSAP1	-0.899368	6.00393	155.582	1.07327e-35	3.19474e-34
CHPF	0.773188	6.23852	155.503	1.11691e-35	3.32112e-34
CKAP2L	-1.18305	4.81053	155.42	1.16467e-35	3.4595e-34
LIMD1	-0.792276	6.05524	155.247	1.27054e-35	3.77003e-34
CD63	0.654986	9.72352	155.168	1.32166e-35	3.9176e-34
SCARB1	0.757669	6.62297	155.079	1.38217e-35	4.09268e-34
TBC1D2B	0.769735	6.36026	154.921	1.49689e-35	4.42773e-34
CASS4	0.731205	6.9069	154.769	1.61587e-35	4.77467e-34
ITGA11	-1.2598	3.98341	154.757	1.62526e-35	4.79739e-34
ECE1	1.13701	4.19592	154.671	1.69697e-35	5.00384e-34
NRG1	-0.800859	5.5384	154.657	1.709e-35	5.03407e-34
CPE	0.910761	5.09927	154.516	1.8344e-35	5.39782e-34
CLDN12	0.905799	4.90368	154.431	1.91524e-35	5.62986e-34
VWF	1.27034	3.65191	154.036	2.33564e-35	6.85849e-34
NEAT1	-0.715347	7.01706	153.927	2.46672e-35	7.23588e-34
STAT4	-1.5695	2.18144	153.923	2.47211e-35	7.24419e-34
ETS1	-0.699606	7.78672	153.712	2.74952e-35	8.04874e-34
PRSS22	2.06175	1.66043	153.629	2.86585e-35	8.3806e-34
PTGFRN	-1.07833	4.76888	153.559	2.96805e-35	8.67052e-34
SNX2	-0.711625	7.27987	153.501	3.05636e-35	8.91926e-34
IQGAP3	-0.858607	5.95132	153.429	3.16971e-35	9.24051e-34
ZBED1	-0.734156	6.60119	153.267	3.4377e-35	1.00115e-33
PLA2G7	1.14032	3.79862	152.973	3.98561e-35	1.15952e-33
SPINT1	0.741648	6.58658	152.518	5.01116e-35	1.45638e-33
FLT3	-2.46736	1.76396	152.434	5.22624e-35	1.51733e-33
FAM72B	-1.037	4.81571	152.361	5.4239e-35	1.5731e-33
HJURP	-1.28637	4.52403	152.334	5.498e-35	1.59295e-33
HSD3B7	0.759241	6.06932	152.311	5.55965e-35	1.60917e-33
ICOSLG	-0.958265	4.92713	152.211	5.84797e-35	1.69089e-33
IL13RA2	5.45771	0.344424	152.145	6.04339e-35	1.74561e-33
TNF	0.814612	5.16409	152.125	6.10734e-35	1.76228e-33
SPATC1L	0.970137	4.80896	152.084	6.23321e-35	1.79677e-33
JPH1	2.16683	1.85196	152.08	6.24434e-35	1.79814e-33
ELK4	-0.769937	6.17651	152.074	6.26359e-35	1.80185e-33
SERPIND1	2.04535	1.78349	152.061	6.30718e-35	1.81254e-33
HTR7	-1.70976	2.50147	152	6.50084e-35	1.8663e-33
TIMP2	0.674171	8.51996	151.981	6.56483e-35	1.88276e-33
ID3	1.34758	3.55058	151.963	6.62275e-35	1.89711e-33
LINC00623	-0.920952	4.91478	151.962	6.62827e-35	1.89711e-33
PROC	2.75686	1.09305	151.766	7.31331e-35	2.09106e-33
CHST11	0.664327	8.91939	151.653	7.74128e-35	2.21119e-33
GOLGA8T	-2.31891	2.2376	151.615	7.89258e-35	2.25213e-33
TMC8	-1.84337	3.09034	151.507	8.33011e-35	2.37458e-33
GABBR2	2.26572	1.83088	151.448	8.5813e-35	2.44373e-33
TTL	0.75343	6.53786	151.43	8.66267e-35	2.46442e-33
NFAM1	0.798503	5.86909	151.301	9.2415e-35	2.62644e-33
RASGRF1	0.77869	6.00501	151.252	9.47025e-35	2.68875e-33
MUC20	2.07088	1.6798	151.243	9.51397e-35	2.69846e-33
VIPR1	-1.30291	3.64415	151.081	1.03212e-34	2.92449e-33
FANCI	-0.826205	6.3266	150.952	1.10167e-34	3.11841e-33
TUBB4A	1.77733	2.3058	150.896	1.13299e-34	3.20386e-33
YES1	0.813262	5.61972	150.779	1.20165e-34	3.39462e-33
INPP5D	-0.691082	7.81289	150.753	1.21766e-34	3.43643e-33
STXBP5-AS1	1.01969	4.44256	150.708	1.24538e-34	3.51115e-33
CD14	-0.721668	6.7868	149.973	1.80203e-34	5.07549e-33
DLGAP5	-1.17788	4.80094	149.92	1.85056e-34	5.20697e-33
RGMA	-1.63666	2.49523	149.883	1.88602e-34	5.30147e-33
TMEM171	-4.24699	-0.501293	149.79	1.97632e-34	5.54979e-33
ELOVL5	0.666256	8.59003	149.565	2.21298e-34	6.2082e-33
TXNIP	-0.666516	8.4852	149.549	2.23069e-34	6.25169e-33
NCLN	0.721182	6.94134	149.51	2.2749e-34	6.36928e-33
MAD2L1	-1.00784	5.28213	149.499	2.2874e-34	6.39794e-33
CIT	-1.31577	4.29899	149.497	2.29011e-34	6.39919e-33
MTMR9	0.782815	5.95571	149.252	2.58954e-34	7.22873e-33
HMMR	-0.975022	5.37443	148.942	3.02693e-34	8.44138e-33
ASIC1	-1.3814	3.61652	148.91	3.07616e-34	8.57021e-33
CXCL5	2.99244	0.508588	148.668	3.47386e-34	9.66869e-33
MYH14	0.831431	5.49902	148.594	3.60649e-34	1.0028e-32
APOL6	-0.665832	8.15252	148.2	4.39735e-34	1.2215e-32
TDRD9	3.70535	0.692083	147.866	5.201e-34	1.44331e-32
MFSD3	0.96482	4.68699	147.728	5.5737e-34	1.54523e-32
MEIOB	1.41457	3.49708	147.611	5.9122e-34	1.63747e-32
PLS1	1.43493	3.12273	147.548	6.103e-34	1.68866e-32
PTPN9	-0.763756	6.18792	147.364	6.69547e-34	1.85078e-32
SEMA6B	1.38428	2.8497	147.231	7.15738e-34	1.97653e-32
RASAL2	0.688377	7.44065	147.19	7.30535e-34	2.01542e-32
H1-2	-0.78139	6.07364	147.073	7.74905e-34	2.13575e-32
IRF7	-0.702989	6.79022	147.049	7.84308e-34	2.15956e-32
RUBCN	-0.744706	6.06943	146.991	8.07551e-34	2.22139e-32
SNN	1.04427	4.25929	146.971	8.15811e-34	2.24193e-32
GNLY	1.10459	3.96651	146.883	8.52846e-34	2.34144e-32
CNTRL	-0.988136	4.88031	146.859	8.63268e-34	2.36775e-32
KLHDC10	0.824139	5.50579	146.697	9.3652e-34	2.56617e-32
PRNP	0.792856	5.82224	146.634	9.66357e-34	2.64537e-32
CTNS	0.942653	4.57871	146.485	1.04162e-33	2.84863e-32
PCDH7	-1.04081	4.48663	146.318	1.13294e-33	3.09539e-32
LOC101928143	1.15462	3.95777	146.227	1.18625e-33	3.23792e-32
XBP1	0.759779	6.02027	146.217	1.19227e-33	3.25122e-32
SEMA4C	-0.820785	5.43679	146.093	1.26893e-33	3.45692e-32
SGSH	-0.781577	5.67022	146.009	1.32358e-33	3.60233e-32
CASKIN2	-0.919504	4.75177	145.897	1.39992e-33	3.80644e-32
FLVCR2	0.869262	5.03273	145.886	1.40801e-33	3.82474e-32
PI4K2A	0.687088	7.39511	145.645	1.58982e-33	4.31447e-32
CASP10	-0.954289	4.44527	145.381	1.81573e-33	4.92284e-32
FCAR	0.675826	7.53028	145.371	1.82479e-33	4.94265e-32
PARP15	-2.09149	1.81903	145.318	1.87379e-33	5.07052e-32
PLK2	-1.50573	2.96026	145.234	1.95429e-33	5.2833e-32
PARP8	-0.794994	5.55763	145.219	1.96944e-33	5.31477e-32
HSH2D	-1.71228	1.98813	145.219	1.96969e-33	5.31477e-32
LDLRAD4	1.20774	3.8145	145.175	2.01328e-33	5.42721e-32
PCDH11Y	1.73939	2.47907	145.055	2.13916e-33	5.76107e-32
THEMIS2	-0.737826	6.09176	144.736	2.51131e-33	6.75688e-32
SH2D2A	-1.43935	2.77453	144.727	2.52273e-33	6.78117e-32
ST8SIA5	-1.61362	2.96028	144.541	2.77031e-33	7.43957e-32
HMGN1	-0.715562	7.03107	144.536	2.77637e-33	7.44879e-32
SNHG16	0.863005	5.27943	144.391	2.98747e-33	8.00756e-32
SLC37A3	1.65716	2.59023	144.345	3.05625e-33	8.18415e-32
NBEAP1	-2.78764	1.22547	144.18	3.3214e-33	8.88578e-32
OAS1	-0.674014	7.4658	144.154	3.36594e-33	8.99641e-32
TMEM251	0.772701	5.8536	144.074	3.50368e-33	9.35571e-32
ILRUN	0.659274	8.19043	144.025	3.59164e-33	9.58154e-32
TTLL12	0.760003	6.19573	144.007	3.62388e-33	9.65846e-32
ZNF292	-0.811074	5.54769	143.709	4.2103e-33	1.12108e-31
DDAH2	-0.758055	6.11285	143.705	4.21925e-33	1.12241e-31
ME1	0.755366	6.2081	143.637	4.36503e-33	1.1601e-31
RGS1	-0.65005	8.68901	143.609	4.42684e-33	1.17542e-31
RIMS2	1.4365	2.89226	143.6	4.44738e-33	1.17977e-31
BTN3A1	-0.845767	4.99711	143.371	4.98963e-33	1.32237e-31
ZNF704	-1.82608	2.2888	143.023	5.94491e-33	1.57406e-31
BHLHE22	-0.666476	7.7798	142.49	7.7743e-33	2.05652e-31
HMG20B	0.681491	7.29607	142.435	7.991e-33	2.11187e-31
PRR16	-0.872293	5.02689	142.432	8.0043e-33	2.1134e-31
CNN2	-0.700116	7.13714	142.352	8.33118e-33	2.19766e-31
PCOLCE2	-1.49213	3.20098	142.163	9.16405e-33	2.41511e-31
DIO2	8.98829	-0.447218	141.657	1.18212e-32	3.11248e-31
IER5L	0.747017	6.11114	141.611	1.20991e-32	3.18267e-31
MELTF	-0.726815	6.69904	141.559	1.24195e-32	3.26393e-31
SDF2L1	0.80058	5.43646	141.454	1.30924e-32	3.43757e-31
MACO1	0.856165	5.10029	141.287	1.42389e-32	3.73513e-31
FNIP2	0.660094	7.77891	141.214	1.47687e-32	3.87052e-31
POLQ	-1.16552	4.52567	141.097	1.56658e-32	4.10183e-31
PJA1	0.913189	4.6739	140.768	1.84903e-32	4.83691e-31
PSMB9	-0.630529	9.34816	140.684	1.9286e-32	5.04038e-31
CARNMT1	1.13272	4.09758	140.628	1.98338e-32	5.17876e-31
NET1	-0.980754	4.89965	140.581	2.03137e-32	5.29917e-31
DPP4	1.22524	3.47256	140.113	2.57037e-32	6.69908e-31
PPP1R12A	-0.715276	6.39482	140.081	2.61201e-32	6.80133e-31
CSF2RB	-0.702877	6.41121	140.057	2.64454e-32	6.8797e-31
PLXNA2	1.69976	2.14772	139.653	3.23949e-32	8.41969e-31
CRLF1	1.7732	2.25479	139.628	3.28203e-32	8.52242e-31
RHOQ	0.763548	5.79307	139.431	3.62243e-32	9.39771e-31
GALNT9	2.83891	0.913424	139.259	3.95039e-32	1.02391e-30
MXRA7	0.764943	5.86571	139.232	4.00434e-32	1.03695e-30
VANGL1	-0.798076	5.74607	139.15	4.17309e-32	1.07966e-30
MS4A7	-0.968966	4.59172	139.072	4.34164e-32	1.12224e-30
HLA-DMB	0.684912	6.6662	138.834	4.8922e-32	1.26339e-30
XDH	4.25772	0.219411	138.806	4.96309e-32	1.28053e-30
PDXDC1	0.640238	8.59739	138.699	5.23808e-32	1.35025e-30
ENTPD6	-0.704469	6.76924	138.621	5.44579e-32	1.40251e-30
SLC38A3	3.44616	0.670301	138.566	5.59846e-32	1.44052e-30
JAK2	-0.702773	6.34048	138.531	5.7e-32	1.46531e-30
ACKR4	-6.04996	-0.715246	138.401	6.0848e-32	1.56281e-30
SHANK3	1.04938	4.23085	138.298	6.40854e-32	1.64447e-30
CNKSR3	1.18546	3.37643	138.286	6.44684e-32	1.6528e-30
GNA13	-0.635862	8.67661	138.157	6.8792e-32	1.76205e-30
DOCK2	-0.669893	7.62172	138.118	7.01582e-32	1.79541e-30
NUAK1	-1.05023	4.04922	137.901	7.82703e-32	2.0012e-30
RAB27A	0.791045	5.61228	137.87	7.9497e-32	2.03073e-30
PHLPP1	-0.820935	5.22535	137.454	9.80013e-32	2.50116e-30
MCM4	-0.698397	7.37971	137.363	1.0256e-31	2.61514e-30
KLHL2	0.787218	5.62533	137.312	1.05237e-31	2.68098e-30
GAB2	-0.828298	4.93748	137.253	1.08449e-31	2.76033e-30
GEM	0.68789	6.64085	137.087	1.179e-31	2.99818e-30
ATP1A2	2.10031	1.81525	137.013	1.22317e-31	3.10772e-30
MMP13	-5.48929	-0.450124	136.755	1.39333e-31	3.53687e-30
ESPL1	-1.22964	3.92858	136.635	1.48014e-31	3.75386e-30
CCNB2	-1.21158	4.38637	136.434	1.63749e-31	4.14918e-30
CBX1	-0.798448	5.69274	136.145	1.89355e-31	4.79372e-30
ARID3A	0.705314	6.4882	136.111	1.92675e-31	4.8734e-30
KPNA6	-0.814109	5.33304	135.731	2.33207e-31	5.89332e-30
GARS1	0.724544	6.28511	135.707	2.3612e-31	5.96161e-30
SPTBN2	1.77386	2.29075	135.456	2.67857e-31	6.75688e-30
PLEKHF1	0.967664	4.25141	135.294	2.90673e-31	7.32589e-30
GCA	-1.22811	3.23289	135.164	3.10278e-31	7.81303e-30
PPARG	1.0474	4.28648	135.065	3.26064e-31	8.20324e-30
MRTFA	-0.742557	5.88532	135.001	3.36836e-31	8.46671e-30
IQSEC2	-0.823515	5.14827	134.979	3.40589e-31	8.55343e-30
JMJD1C	-0.653369	7.73016	134.963	3.43377e-31	8.6158e-30
KIF15	-1.28061	4.30963	134.921	3.5069e-31	8.79149e-30
EPS15	-0.842348	5.20248	134.846	3.64199e-31	9.12208e-30
CPEB1	1.28925	3.4238	134.78	3.76425e-31	9.41995e-30
SIGLEC1	-0.653437	7.31996	134.635	4.05009e-31	1.01263e-29
POPDC3	1.22295	3.4549	134.558	4.2096e-31	1.05158e-29
GPX4	-0.678072	6.97348	134.522	4.28615e-31	1.06976e-29
CKAP2	-0.847307	5.67031	134.475	4.38815e-31	1.09425e-29
BRIP1	-1.35059	3.80488	134.354	4.66411e-31	1.16204e-29
SMC4	-0.699023	7.18505	134.105	5.28778e-31	1.31627e-29
TNFRSF10D	0.858961	5.28745	133.918	5.81075e-31	1.44518e-29
ST3GAL6	0.77077	5.73746	133.88	5.92044e-31	1.47116e-29
MICALCL	1.32814	3.14299	133.83	6.07179e-31	1.50745e-29
NRIP3	0.713892	6.15375	133.664	6.60104e-31	1.63741e-29
BMP6	1.28596	2.99071	133.521	7.09475e-31	1.75833e-29
CREBRF	-0.872857	4.62777	133.477	7.25438e-31	1.79632e-29
CTDNEP1	-0.772165	5.61644	133.419	7.46721e-31	1.8474e-29
ALDH2	1.7563	2.27984	133.416	7.47897e-31	1.84869e-29
RAD54L	-1.29063	4.03444	133.411	7.4999e-31	1.85225e-29
LRIG1	1.08554	4.14155	133.381	7.61371e-31	1.87871e-29
LOC145783	-1.01383	4.33967	133.374	7.63962e-31	1.88346e-29
ATP6V0C	0.65193	7.58586	133.361	7.68971e-31	1.89416e-29
FAS	-1.87048	1.28395	133.117	8.69335e-31	2.13952e-29
VAC14	0.693862	6.54007	133.083	8.84673e-31	2.17537e-29
CD83	0.68401	6.4025	132.872	9.8351e-31	2.41631e-29
CHROMR	-1.12562	3.71132	132.834	1.0026e-30	2.46106e-29
PXN	0.668537	7.13015	132.672	1.08807e-30	2.66856e-29
HESX1	-1.89001	1.31763	132.466	1.20654e-30	2.95655e-29
TRIM38	-0.770922	5.31176	132.461	1.20958e-30	2.96142e-29
PSKH1	0.714709	6.33791	132.449	1.21695e-30	2.9769e-29
FAIM	1.17399	3.56684	132.367	1.26842e-30	3.10012e-29
KNL1	-1.17385	4.46449	132.336	1.28855e-30	3.14659e-29
ZNF219	0.829328	5.19574	132.308	1.30688e-30	3.1886e-29
ELFN1	-1.83847	2.07718	132.174	1.39802e-30	3.40804e-29
GRID1	1.80896	2.02836	132.099	1.45154e-30	3.53546e-29
GASK1B	2.00135	1.76205	132.076	1.46834e-30	3.5733e-29
EXOSC9	-0.914424	4.77282	131.884	1.61721e-30	3.93221e-29
PIEZO2	-1.78477	2.40998	131.867	1.63103e-30	3.96239e-29
THUMPD1	-0.857279	5.01023	131.566	1.89876e-30	4.60884e-29
SH3RF2	1.65164	2.20487	131.498	1.96477e-30	4.76499e-29
OSTM1	0.646928	7.66338	131.492	1.97e-30	4.77359e-29
SLC25A28	-0.904923	4.38543	131.407	2.05695e-30	4.98e-29
SORBS1	1.70526	2.08236	131.359	2.10646e-30	5.09551e-29
CXCL13	-1.83795	1.50527	130.822	2.76132e-30	6.6739e-29
UBE2C	-1.39767	3.75992	130.694	2.9447e-30	7.11104e-29
PPL	1.89617	1.92367	130.55	3.16536e-30	7.63737e-29
CD58	0.705778	6.20118	130.141	3.89089e-30	9.37994e-29
TMEM215	1.12354	3.85769	130.056	4.05918e-30	9.77731e-29
GGT1	-0.738	5.98064	129.898	4.39563e-30	1.05787e-28
CDCA5	-1.04963	4.74988	129.8	4.61809e-30	1.11046e-28
SLC48A1	0.998677	4.35906	129.692	4.87663e-30	1.17163e-28
GTF2F1	-0.649388	7.32764	129.64	5.00581e-30	1.20165e-28
KCNMA1	-1.7449	2.47023	129.549	5.24098e-30	1.25704e-28
PML	-0.645348	7.1507	129.536	5.27482e-30	1.26408e-28
PHF24	2.43614	1.08305	129.481	5.42408e-30	1.29875e-28
TNRC6B	-0.790948	5.30144	129.425	5.57708e-30	1.33425e-28
LOC101927752	0.832915	5.04235	129.155	6.38987e-30	1.52741e-28
RASD2	-1.10142	3.72589	129.048	6.74592e-30	1.61116e-28
DBN1	0.651498	7.42791	129.003	6.89933e-30	1.64641e-28
COX5B	0.63414	7.90828	128.975	6.99645e-30	1.66818e-28
P3H1	-0.652613	7.33716	128.858	7.42283e-30	1.76835e-28
TMEM140	-1.08497	3.19682	128.651	8.23767e-30	1.96081e-28
DLG3	-1.46421	3.57819	128.274	9.96043e-30	2.36889e-28
MYB	-2.03956	2.63137	128.246	1.01023e-29	2.40061e-28
SPATA18	2.19635	1.53172	128.233	1.01658e-29	2.41366e-28
PARP14	-0.606535	8.9974	128.14	1.06536e-29	2.52738e-28
CLN8	0.688994	6.44754	128.108	1.08299e-29	2.56705e-28
ARHGAP11B	-1.14457	4.15734	128.04	1.12027e-29	2.65317e-28
ASAP2	0.73923	5.80339	127.99	1.14931e-29	2.71968e-28
C4orf33	-1.15032	3.5301	127.884	1.21208e-29	2.86581e-28
GAS6	-1.22446	3.27952	127.778	1.27834e-29	3.01995e-28
FAM205C	-0.946179	4.28699	127.623	1.3823e-29	3.26284e-28
MAX	-0.734058	5.59764	127.605	1.39466e-29	3.28926e-28
ASF1B	-0.93767	5.09802	127.495	1.47431e-29	3.47422e-28
FCER1G	-0.612204	8.61105	127.409	1.53968e-29	3.62524e-28
USP6NL	-0.993126	4.05331	127.347	1.58851e-29	3.7371e-28
ERFE	-0.993454	4.19873	127.341	1.59302e-29	3.74458e-28
CLIP2	0.716337	5.91184	127.312	1.61669e-29	3.79707e-28
GBP1P1	-0.898573	4.08824	127.31	1.61829e-29	3.79769e-28
CCNA2	-0.874457	5.63425	127.291	1.63406e-29	3.83152e-28
KIF20B	-1.03796	4.74098	127.267	1.65343e-29	3.87371e-28
CACUL1	0.702156	6.2203	127.072	1.82419e-29	4.27023e-28
TTC7A	0.651853	7.14005	126.879	2.01015e-29	4.70165e-28
S100A12	2.87208	0.238173	126.822	2.06952e-29	4.83652e-28
LOC100130238	5.26235	-0.0890919	126.726	2.17193e-29	5.07166e-28
SGPP1	1.15423	3.70735	126.67	2.23358e-29	5.21008e-28
MAP3K20	-0.758057	5.71137	126.669	2.23489e-29	5.21008e-28
VPS33A	0.87263	4.73946	126.61	2.30194e-29	5.36197e-28
RAB6B	0.807384	5.14727	126.586	2.3301e-29	5.42309e-28
CARD6	-0.835822	4.84814	126.467	2.47378e-29	5.75275e-28
RBM43	-0.897003	4.56128	126.334	2.64573e-29	6.14756e-28
MYLIP	1.12579	3.61644	126.248	2.76261e-29	6.41389e-28
TRNP1	2.5575	1.37696	126.229	2.78927e-29	6.47046e-28
GLA	0.639821	7.28895	126.149	2.90358e-29	6.72994e-28
GABRD	-3.52826	0.997805	126.148	2.90588e-29	6.72994e-28
ATP2C1	-0.65685	6.9555	126.044	3.0615e-29	7.08453e-28
BTK	-0.662659	6.69625	125.781	3.49441e-29	8.07972e-28
ATP6AP1	0.602798	9.04088	125.761	3.53075e-29	8.15707e-28
FOXM1	-0.99125	4.88942	125.716	3.61129e-29	8.33634e-28
PPT1	0.553095	11.2106	125.608	3.8125e-29	8.79362e-28
CRLF3	-0.954665	4.28162	125.59	3.84728e-29	8.86662e-28
EHBP1L1	-0.665671	6.6487	125.565	3.89637e-29	8.97244e-28
ATP1A3	1.69709	2.22877	125.267	4.52809e-29	1.04187e-27
TPM4	-0.584627	9.85083	124.98	5.23281e-29	1.20304e-27
LIMA1	-0.735638	5.75463	124.973	5.25098e-29	1.20623e-27
CLCN7	0.622722	7.84445	124.959	5.28781e-29	1.21371e-27
AKAP13	-0.678445	6.38613	124.856	5.56965e-29	1.27736e-27
IGFLR1	-0.97347	4.00392	124.826	5.65278e-29	1.29537e-27
PDE7B	-2.3838	1.77252	124.824	5.65929e-29	1.29582e-27
DST	0.731005	5.89355	124.791	5.75508e-29	1.31668e-27
NRM	-0.909039	4.80461	124.742	5.89819e-29	1.34833e-27
ETV3L	-2.08836	1.04299	124.605	6.31915e-29	1.4434e-27
NECTIN2	-0.627073	7.52325	124.444	6.85223e-29	1.5639e-27
TMEM87B	-0.627471	7.81093	124.335	7.23873e-29	1.65078e-27
CCSAP	0.783555	5.52541	124.261	7.51566e-29	1.71255e-27
PHF2	-0.767834	5.41164	124.193	7.77847e-29	1.77101e-27
WHAMMP2	-2.16072	2.09924	124.118	8.07696e-29	1.83749e-27
SORT1	-0.639324	7.22499	123.949	8.79376e-29	1.99895e-27
C1orf198	-0.616559	7.93835	123.93	8.87824e-29	2.01654e-27
TMEM132A	0.718149	5.84406	123.903	9.00148e-29	2.04289e-27
SHPK	1.11272	3.6784	123.78	9.57593e-29	2.17152e-27
DHFR	-0.796301	5.93983	123.759	9.67854e-29	2.19303e-27
SLC16A2	0.952442	4.46819	123.725	9.84582e-29	2.22914e-27
HLA-DRB1	-0.600823	8.51753	123.699	9.97558e-29	2.25671e-27
CACNA1C	3.62006	0.203633	123.51	1.09718e-28	2.4801e-27
UHRF1	-0.865543	5.40474	123.5	1.10264e-28	2.49046e-27
CHCHD10	0.703261	6.04445	123.265	1.24121e-28	2.79917e-27
LGALS9	-0.598939	8.75003	123.265	1.24131e-28	2.79917e-27
SLC4A4	-2.59222	1.13449	123.129	1.32944e-28	2.99552e-27
RBM8A	0.693812	6.21184	122.976	1.43578e-28	3.23257e-27
FNBP1	-0.858159	4.81823	122.812	1.5591e-28	3.50741e-27
N4BP1	-0.645494	6.83898	122.804	1.56552e-28	3.51907e-27
IMPA2	1.65159	2.60207	122.759	1.60164e-28	3.5974e-27
PRDX1	0.609774	8.21998	122.735	1.62087e-28	3.63771e-27
PLIN3	0.613982	7.95368	122.423	1.89685e-28	4.2537e-27
LAT2	0.634658	7.43472	122.195	2.12717e-28	4.76642e-27
P2RX5	2.10508	1.78419	122.056	2.28234e-28	5.11006e-27
FIG4	0.659242	6.64863	121.968	2.38543e-28	5.33664e-27
KIF14	-1.05063	4.795	121.895	2.47522e-28	5.53313e-27
ATP6V1F	0.654175	6.74084	121.831	2.5557e-28	5.70853e-27
LGMN	-1.0465	3.49549	121.754	2.65718e-28	5.93052e-27
ADGRL3	0.690159	6.10574	121.701	2.72836e-28	6.08458e-27
MCM2	-0.719449	6.37598	121.675	2.76485e-28	6.16111e-27
ADSS2	0.670235	6.6048	121.664	2.78085e-28	6.19187e-27
KLHL24	-0.716643	5.61884	121.657	2.79015e-28	6.2077e-27
ATP6V0B	0.597555	8.71659	121.584	2.89495e-28	6.4358e-27
CTNNB1	-0.580896	9.66274	121.509	3.00651e-28	6.67856e-27
FOXD1	-0.930336	4.38163	121.497	3.02478e-28	6.71388e-27
CSTB	0.6079	8.08563	121.493	3.03013e-28	6.72046e-27
NDC80	-1.11063	4.56186	121.198	3.51613e-28	7.79226e-27
STX3	0.678113	6.22269	121.18	3.54834e-28	7.85747e-27
NEK10	-2.17907	1.32148	121.161	3.58175e-28	7.92524e-27
ARHGAP15	-0.822314	5.0512	121.14	3.62096e-28	8.00574e-27
SERPINH1	-0.63994	7.03318	121.104	3.68705e-28	8.1455e-27
PDHX	0.770891	5.25019	121.06	3.76876e-28	8.31952e-27
PARP1	-0.5893	9.30668	120.954	3.97667e-28	8.77163e-27
VSTM4	-2.37817	1.66834	120.818	4.25686e-28	9.38234e-27
PPARGC1A	-2.49336	1.39385	120.8	4.29653e-28	9.46241e-27
ELP1	-0.865903	5.01547	120.213	5.77429e-28	1.2707e-26
TNRC6A	0.685148	6.19027	120.173	5.89362e-28	1.29596e-26
MAP2K5	0.904218	4.42794	120.154	5.94822e-28	1.30694e-26
KIF18B	-1.20975	4.19767	120.14	5.99218e-28	1.31558e-26
HTT	0.608788	8.11964	120.112	6.07643e-28	1.33304e-26
SPARCL1	-1.06409	4.02814	119.917	6.70471e-28	1.46973e-26
CMIP	-0.69681	5.80373	119.907	6.73646e-28	1.47555e-26
LIMK1	0.620854	7.45284	119.838	6.97654e-28	1.52695e-26
SLC36A4	0.748675	5.45113	119.643	7.69777e-28	1.68351e-26
HMGA2-AS1	-2.97628	0.40188	119.596	7.87875e-28	1.72174e-26
HDAC3	-0.711606	5.83266	119.595	7.88478e-28	1.72174e-26
TCAF2	-2.02901	0.958815	119.589	7.90871e-28	1.72564e-26
THBD	-0.586428	9.02386	119.436	8.54333e-28	1.86267e-26
SCAMP1	-0.754587	5.31482	119.384	8.76922e-28	1.91045e-26
LOC100130992	-1.12623	3.57177	119.375	8.80872e-28	1.91757e-26
FCGR1A	-0.667114	6.16162	119.275	9.26547e-28	2.01545e-26
BLZF1	-0.689996	5.70595	119.23	9.47664e-28	2.0598e-26
DDIT3	0.979505	3.8689	119.228	9.48518e-28	2.06008e-26
ANKRD50	0.707541	5.76582	119.026	1.05045e-27	2.27972e-26
ACO2	0.612065	7.81019	119.02	1.05316e-27	2.28383e-26
CD84	0.804448	5.06577	119.01	1.05863e-27	2.29393e-26
LOC112268354	-4.1387	-0.607936	118.833	1.15739e-27	2.50602e-26
PSIP1	-0.81035	5.51885	118.733	1.21754e-27	2.63425e-26
CD180	-1.15062	4.47118	118.704	1.23545e-27	2.67096e-26
CDH2	-1.24762	3.58858	118.702	1.2365e-27	2.67118e-26
ADCY1	-0.937332	4.49276	118.7	1.23785e-27	2.67206e-26
MAP3K4	0.666462	6.50362	118.67	1.2569e-27	2.7111e-26
TLE4	-0.716587	5.73169	118.632	1.28064e-27	2.76021e-26
NTNG1	3.23461	0.490641	118.524	1.35241e-27	2.91268e-26
CYTH1	-0.671508	6.1943	118.344	1.48128e-27	3.1878e-26
MYOF	0.606587	7.88666	118.335	1.48741e-27	3.19856e-26
FADS2	0.710553	5.83224	118.234	1.56551e-27	3.36393e-26
ZBTB38	-0.668772	6.21842	118.203	1.59013e-27	3.41425e-26
RGS13	-1.34899	3.07121	118.164	1.6219e-27	3.47983e-26
RCSD1	0.755053	5.44861	117.918	1.83517e-27	3.93442e-26
IARS1	0.626832	7.38075	117.859	1.891e-27	4.05104e-26
PIGR	1.11497	3.50367	117.831	1.91806e-27	4.1059e-26
IL1R1	-0.869161	4.7443	117.736	2.01211e-27	4.30397e-26
TNFAIP8	-0.683541	5.85133	117.681	2.0684e-27	4.42102e-26
ACKR3	0.862557	4.25208	117.641	2.11071e-27	4.50807e-26
CD86	-1.28507	3.43076	117.553	2.20588e-27	4.70776e-26
ACVR2A	-0.925105	4.47061	117.477	2.29232e-27	4.88856e-26
SPARC	1.44361	2.73588	117.475	2.29412e-27	4.88871e-26
HSD17B11	-0.678852	6.32367	117.376	2.41219e-27	5.13644e-26
NCALD	-1.44105	2.93847	117.258	2.56029e-27	5.4477e-26
BAG3	0.652945	6.44386	117.159	2.69125e-27	5.72204e-26
SLC7A7	-0.611823	7.55961	116.853	3.13893e-27	6.66887e-26
NCAPG2	-0.760796	5.81761	116.648	3.48123e-27	7.39055e-26
TSPOAP1	-0.848923	4.62964	116.626	3.51957e-27	7.46634e-26
KIF21A	0.967609	4.13237	116.376	3.99282e-27	8.46394e-26
SSB	-0.647154	6.56164	116.359	4.02606e-27	8.52802e-26
PREX1	-0.65629	6.71479	116.266	4.21927e-27	8.93058e-26
LCNL1	2.55658	0.7448	116.23	4.29669e-27	9.08764e-26
HLA-DRA	-0.54579	10.5464	115.974	4.88917e-27	1.0333e-25
KCNK6	0.809835	4.97318	115.9	5.07506e-27	1.07179e-25
ACVR1B	0.75539	5.25424	115.668	5.7055e-27	1.20403e-25
STAT6	-0.60159	7.68677	115.637	5.79385e-27	1.22176e-25
AHRR	-0.647966	6.66603	115.57	5.99192e-27	1.26259e-25
LINC00964	2.4607	0.859867	115.492	6.23345e-27	1.31251e-25
SLC44A1	0.688803	5.90814	115.451	6.36352e-27	1.3389e-25
KLF13	-0.597813	8.06413	115.445	6.3813e-27	1.34164e-25
IDH2	-0.630077	7.15266	115.239	7.08098e-27	1.48764e-25
SRGAP2	-0.610439	7.26657	115.027	7.88041e-27	1.65436e-25
MCM7	-0.697296	6.40971	114.981	8.06357e-27	1.69155e-25
TRIB3	0.859147	4.68601	114.972	8.10226e-27	1.69841e-25
NSF	0.570394	9.40236	114.852	8.60506e-27	1.80247e-25
LINC01050	1.46506	2.15416	114.826	8.72149e-27	1.82551e-25
MMS22L	-0.937912	5.0403	114.676	9.40422e-27	1.96696e-25
GSDME	0.817244	4.6617	114.561	9.96511e-27	2.08273e-25
PSMB5	0.630259	6.89634	114.524	1.01531e-26	2.12044e-25
CEBPD	-1.07443	3.4365	114.451	1.05356e-26	2.19871e-25
GOLGA8H	-1.67574	2.52077	114.166	1.21591e-26	2.53566e-25
RGS20	1.12346	3.22699	114.117	1.24626e-26	2.59704e-25
FLRT2	0.788211	5.01852	113.819	1.4484e-26	3.01604e-25
S100A6	0.574602	8.93702	113.744	1.50412e-26	3.12976e-25
MEF2C-AS1	-2.42073	1.6492	113.74	1.50757e-26	3.13464e-25
TCAF1	-1.03696	4.01397	113.612	1.60804e-26	3.34109e-25
LOC441155	-0.897347	4.34773	113.53	1.67607e-26	3.47988e-25
COMMD6	-0.778713	5.253	113.51	1.69237e-26	3.51113e-25
MYO15B	-0.740207	5.25397	113.311	1.87101e-26	3.87893e-25
GBP2	-0.608389	6.9019	113.264	1.91665e-26	3.97063e-25
ABCB1	0.826473	4.68377	113.24	1.93954e-26	4.01511e-25
MGAM	1.18884	2.99502	113.138	2.04133e-26	4.22274e-25
IL11	-2.1536	0.761482	113.03	2.15629e-26	4.45727e-25
DCAF13	0.696987	5.79557	113.006	2.1825e-26	4.50817e-25
LOC648987	-1.4514	2.2627	112.978	2.21391e-26	4.5697e-25
P2RY8	-0.70136	5.86156	112.833	2.38132e-26	4.91167e-25
PDCD6IP	0.597838	7.68579	112.731	2.50729e-26	5.16773e-25
MFHAS1	0.676773	5.95688	112.669	2.58692e-26	5.32797e-25
COL6A1	0.547925	10.1377	112.524	2.78221e-26	5.72601e-25
KLF16	0.653214	6.40186	112.514	2.79614e-26	5.75049e-25
SLFN11	-0.663326	6.24654	112.428	2.92117e-26	6.00326e-25
CD164	0.532008	10.8231	112.409	2.94873e-26	6.05286e-25
SH2D3C	1.15122	3.28275	112.408	2.94959e-26	6.05286e-25
STRIP2	1.02104	3.85807	112.366	3.01389e-26	6.18034e-25
PSRC1	-0.978692	4.53297	112.235	3.21889e-26	6.59592e-25
ZNF217	-0.637794	6.67549	112.167	3.33209e-26	6.82294e-25
RFTN1	0.599348	7.29386	112.16	3.34223e-26	6.83876e-25
AGER	-0.804457	4.89952	112.148	3.36413e-26	6.87859e-25
RERE	-0.800251	4.74573	112.017	3.59283e-26	7.3409e-25
AP1S3	-0.923976	4.13327	111.967	3.68484e-26	7.52347e-25
AAK1	-0.658429	6.28787	111.942	3.73191e-26	7.61407e-25
EVI2A	-0.625357	6.947	111.799	4.01067e-26	8.17692e-25
KIF23	-0.954731	4.88651	111.642	4.33995e-26	8.84187e-25
POLE	-0.853132	5.04716	111.618	4.3939e-26	8.94534e-25
NUDT4	0.668378	6.01574	111.532	4.58713e-26	9.33201e-25
IKBKE	-0.624529	6.73886	111.361	5.00024e-26	1.01651e-24
DCBLD2	0.764168	5.1534	111.35	5.0288e-26	1.02158e-24
EML6	1.95483	1.69801	111.336	5.06546e-26	1.02829e-24
IMPDH1	0.82699	4.88577	111.124	5.63728e-26	1.14355e-24
KCNN2	0.815464	4.66346	110.931	6.21225e-26	1.25928e-24
PBK	-1.02875	4.69261	110.561	7.4852e-26	1.51624e-24
CKS1B	-0.807557	5.17168	110.546	7.54186e-26	1.52662e-24
LINC02458	1.20633	3.04209	110.499	7.72189e-26	1.56194e-24
NR4A3	-0.727629	4.85385	110.439	7.9615e-26	1.60926e-24
RFX8	-0.893776	4.38295	110.263	8.70165e-26	1.75761e-24
SCLT1	-0.937105	4.20431	110.244	8.78165e-26	1.7725e-24
SGO2	-0.990097	4.57677	110.177	9.08485e-26	1.83239e-24
EMP1	-0.582984	8.09811	109.924	1.03219e-25	2.08042e-24
R3HDM2	-0.812565	4.71697	109.897	1.04651e-25	2.10778e-24
BMP4	-1.57997	2.52513	109.847	1.07322e-25	2.16003e-24
MIOS	-0.783278	5.05366	109.619	1.20374e-25	2.42101e-24
LONP1	0.599416	7.26626	109.549	1.24723e-25	2.5067e-24
CALU	0.578524	8.16389	109.433	1.32198e-25	2.65503e-24
SPHK1	0.601929	7.05738	109.419	1.33115e-25	2.67156e-24
MMP12	-2.09938	0.841884	109.345	1.38241e-25	2.77246e-24
MARCKSL1	-0.636197	6.32299	109.343	1.38381e-25	2.77331e-24
SERPING1	-0.642698	5.62209	109.287	1.42297e-25	2.84976e-24
CAB39L	0.733579	5.19286	109.224	1.46925e-25	2.94037e-24
CCR1	-0.568988	8.32268	109.157	1.51949e-25	3.03877e-24
SKI	0.698394	5.67064	109.138	1.53414e-25	3.0659e-24
FLT1	-1.30932	2.72976	109.102	1.56245e-25	3.12026e-24
ADGRE4P	1.02177	3.91033	108.643	1.96888e-25	3.92914e-24
TFPI	1.11565	3.49772	108.559	2.0539e-25	4.09592e-24
MASTL	-0.817731	4.83181	108.522	2.09269e-25	4.17033e-24
KITLG	-0.716742	5.21735	108.496	2.12017e-25	4.22213e-24
RFX5	-0.638494	6.19901	108.419	2.20494e-25	4.38785e-24
NEK2	-1.20887	4.08702	108.279	2.36618e-25	4.7054e-24
UPP1	0.613228	6.71101	108.141	2.53641e-25	5.04038e-24
PRICKLE2	-5.6264	-0.627589	107.933	2.81703e-25	5.5941e-24
RNF220	-0.744852	5.18662	107.814	2.99099e-25	5.93538e-24
TTF2	-0.730132	5.6562	107.746	3.09594e-25	6.13935e-24
NAGK	-0.686126	5.45294	107.705	3.1598e-25	6.26158e-24
COL1A1	0.779459	4.75182	107.682	3.19627e-25	6.32942e-24
PLXND1	0.580962	7.86692	107.648	3.25256e-25	6.43638e-24
CAPN2	0.558254	8.97008	107.468	3.56127e-25	7.04234e-24
SPC25	-1.19926	4.08081	107.458	3.57862e-25	7.0717e-24
LCA5	-2.01215	1.25974	107.395	3.69543e-25	7.29745e-24
CYFIP2	1.25402	2.75001	107.37	3.74228e-25	7.3848e-24
ANKRD52	0.58463	7.74003	107.263	3.94912e-25	7.78753e-24
PITX1	1.327	2.62596	107.261	3.95283e-25	7.78942e-24
MFSD6	0.688585	5.80872	107.045	4.40909e-25	8.67749e-24
RYR1	1.36194	2.6378	107.044	4.40963e-25	8.67749e-24
SNX6	-0.601253	6.97666	106.932	4.6656e-25	9.17481e-24
PRCP	0.658627	5.98355	106.738	5.14602e-25	1.01125e-23
STX4	0.594197	7.03141	106.681	5.29676e-25	1.04015e-23
NCF1	-0.646502	5.50459	106.595	5.53077e-25	1.08535e-23
SRPRB	0.685066	5.90642	106.493	5.82377e-25	1.14206e-23
NMNAT2	2.07813	1.4176	106.433	6.00343e-25	1.17647e-23
RBP4	3.62498	0.00990613	106.346	6.27307e-25	1.22846e-23
RETREG1	1.77033	1.79376	106.213	6.70592e-25	1.31232e-23
SV2B	-1.43802	2.90066	105.87	7.974e-25	1.5594e-23
SLC22A16	-0.74656	5.00689	105.812	8.2107e-25	1.60458e-23
SLC25A22	0.695031	5.37401	105.71	8.64348e-25	1.68799e-23
SMS	0.607456	6.86517	105.702	8.678e-25	1.69356e-23
PDIK1L	1.23536	3.18533	105.695	8.70796e-25	1.69823e-23
ARRB1	0.59567	7.19445	105.678	8.78393e-25	1.71187e-23
FZD5	-0.887276	3.98151	105.649	8.91217e-25	1.73566e-23
NDE1	0.639909	6.19804	105.617	9.05893e-25	1.76303e-23
DMP1	-2.13301	1.24787	105.523	9.49742e-25	1.8471e-23
KDM4B	0.654974	5.88249	105.521	9.50696e-25	1.84768e-23
SIGLEC15	0.933001	4.16751	105.449	9.86075e-25	1.91512e-23
HLA-DQB1	-0.632234	5.7287	105.211	1.11167e-24	2.15757e-23
SLC36A1	-0.580629	7.54082	105.045	1.20875e-24	2.34437e-23
SPATA13	0.954687	3.81396	104.956	1.26465e-24	2.45111e-23
HLA-DRB5	-0.623195	5.88636	104.937	1.27647e-24	2.47233e-23
ETV6	-0.770575	4.87814	104.865	1.32401e-24	2.56265e-23
PHF19	-0.745822	5.46462	104.845	1.33701e-24	2.5852e-23
SIX1	-1.40061	1.971	104.845	1.33749e-24	2.5852e-23
MIEF1	0.606021	6.85929	104.819	1.35489e-24	2.61705e-23
XPOT	0.66763	6.04637	104.817	1.35586e-24	2.61714e-23
CD163L1	-1.1094	3.31072	104.587	1.52342e-24	2.93856e-23
ADGRE2	-0.604374	6.77874	104.581	1.52742e-24	2.94426e-23
RBPMS2	1.9964	1.48672	104.462	1.62227e-24	3.12497e-23
SEMA3C	0.711841	5.12196	104.458	1.62522e-24	3.12853e-23
OSGIN2	0.630492	6.21094	104.427	1.65129e-24	3.17655e-23
FCGR1CP	-0.776444	4.61079	104.378	1.69253e-24	3.25366e-23
EIF4G1	0.543996	9.40772	104.339	1.7257e-24	3.31517e-23
GPRIN1	0.774372	4.83603	104.298	1.76173e-24	3.38208e-23
KIFBP	-0.899294	4.2686	104.289	1.77037e-24	3.39638e-23
TYRO3	1.33195	3.02042	103.915	2.13719e-24	4.09731e-23
TUBA4A	0.659633	5.96387	103.9	2.1534e-24	4.1256e-23
ITGA2	-1.38378	2.47136	103.823	2.23926e-24	4.28718e-23
SATB1	-0.59489	7.06393	103.49	2.64843e-24	5.06715e-23
MAF	0.649246	5.96296	103.386	2.79129e-24	5.33685e-23
ADD3	0.878707	4.50296	103.33	2.87194e-24	5.48735e-23
TRAM1	0.558748	8.23212	103.326	2.87797e-24	5.49515e-23
CTSW	-0.643275	5.8917	103.288	2.93263e-24	5.59574e-23
TMEM151B	2.10817	1.11264	103.264	2.96836e-24	5.66011e-23
TTC28	0.778243	4.73033	103.217	3.0404e-24	5.79356e-23
BTG1	-0.550675	8.49499	103.181	3.09639e-24	5.89627e-23
SHANK1	0.701538	5.3347	103.068	3.27794e-24	6.2378e-23
TSPYL5	-0.669309	5.59494	102.907	3.55441e-24	6.75935e-23
SERTAD2	0.587749	7.0632	102.844	3.67011e-24	6.9747e-23
GPC4	0.53869	9.44713	102.82	3.71391e-24	7.05318e-23
GMCL1	-0.892378	4.48615	102.806	3.74042e-24	7.09876e-23
SLC38A6	0.752083	4.92826	102.627	4.09388e-24	7.76437e-23
ARSG	1.67584	1.97244	102.607	4.13543e-24	7.83791e-23
PI4K2B	-0.647159	6.06307	102.587	4.17758e-24	7.91251e-23
TSPAN18	1.39396	2.38917	102.572	4.20908e-24	7.96682e-23
FEZ1	-1.73609	1.71623	102.533	4.29272e-24	8.11971e-23
LINC01145	-1.26415	2.83254	102.517	4.3285e-24	8.1819e-23
UBASH3B	-0.913875	4.24515	102.514	4.33501e-24	8.18874e-23
SHC4	1.1208	3.16925	102.446	4.48594e-24	8.46818e-23
UBE2E3	-0.726536	5.42381	102.391	4.61245e-24	8.70119e-23
TVP23A	-5.17084	-0.897641	102.285	4.86471e-24	9.17095e-23
NUF2	-1.03478	4.44564	102.264	4.91816e-24	9.26554e-23
LCLAT1	-1.118	3.73579	102.261	4.92486e-24	9.27198e-23
PGM2	-0.599101	6.90892	101.983	5.66605e-24	1.06603e-22
GATA2	1.02669	3.48678	101.972	5.69736e-24	1.07121e-22
SLC1A5	0.607639	6.66167	101.747	6.38189e-24	1.19912e-22
EPB41	0.845999	4.3083	101.74	6.40601e-24	1.20285e-22
TLE1	0.967551	3.83898	101.735	6.4212e-24	1.2049e-22
ETHE1	-0.651011	5.70618	101.467	7.35283e-24	1.3788e-22
IFI30	0.523937	9.92539	101.352	7.79141e-24	1.46008e-22
PRKD2	-0.765443	4.66969	101.258	8.16753e-24	1.52954e-22
FANCA	-0.705599	5.28101	101.227	8.29857e-24	1.55306e-22
FGFRL1	-0.657194	5.65995	101.212	8.35998e-24	1.56352e-22
DUSP3	0.577591	7.26898	101.17	8.54069e-24	1.59626e-22
IL2RB	-1.14022	3.1541	101.143	8.65763e-24	1.61704e-22
P2RX1	1.00509	3.63031	101.126	8.73056e-24	1.62959e-22
OTUD7B	0.665071	5.45879	101.091	8.88584e-24	1.65748e-22
HGF	-5.15896	-0.921288	100.97	9.44428e-24	1.76048e-22
TMEM37	-2.2319	1.60781	100.879	9.89271e-24	1.84286e-22
TNIP1	0.580626	6.9458	100.874	9.91522e-24	1.84584e-22
TGFB1I1	-1.01577	3.71131	100.865	9.9603e-24	1.85301e-22
CLSPN	-0.917507	4.75862	100.761	1.04978e-23	1.95171e-22
ATP5F1A	0.536681	9.24929	100.709	1.07778e-23	2.00245e-22
HS3ST1	-2.54844	0.775306	100.699	1.08284e-23	2.01053e-22
HNRNPLL	-0.66741	5.57338	100.672	1.09789e-23	2.03714e-22
AVPI1	0.87248	3.95619	100.616	1.12937e-23	2.09419e-22
WIPF3	-1.45277	2.54479	100.482	1.20865e-23	2.23973e-22
SLC51B	5.54067	-0.717944	100.47	1.21554e-23	2.25101e-22
AMPD2	0.573876	7.38357	100.366	1.28109e-23	2.37086e-22
PTPRF	1.06952	3.50692	100.357	1.28693e-23	2.38011e-22
ATP10D	-0.633832	6.07752	99.9246	1.60105e-23	2.95912e-22
ALG3	0.665117	5.69599	99.7815	1.72092e-23	3.17859e-22
C15orf39	-0.638807	5.96226	99.7187	1.77635e-23	3.27883e-22
ATP2B1	0.609633	6.37753	99.6616	1.82823e-23	3.37239e-22
NFIC	-0.653935	5.67786	99.5439	1.94017e-23	3.57653e-22
SYT7	1.09476	3.28684	99.5306	1.95323e-23	3.59826e-22
TRPV1	1.40272	2.34469	99.5086	1.97508e-23	3.63615e-22
OSBPL8	0.545642	8.2927	99.4407	2.04396e-23	3.76051e-22
ATP6V1E1	0.559881	7.66048	99.3864	2.10071e-23	3.86242e-22
PGAM1	0.538096	8.84998	99.1751	2.33717e-23	4.29438e-22
GIPR	1.11053	3.00214	99.1426	2.37572e-23	4.36238e-22
GHITM	0.561815	7.65436	99.1016	2.42541e-23	4.45073e-22
IQSEC1	0.584179	6.88228	99.0876	2.44268e-23	4.47952e-22
HSPA1L	-0.93856	3.80587	99.0794	2.45278e-23	4.49513e-22
NUB1	-0.601626	6.10408	99.0665	2.46884e-23	4.52163e-22
SPRY4	0.630618	5.9978	99.0611	2.4755e-23	4.53089e-22
CACNA2D3	3.19553	0.423482	99.0244	2.52184e-23	4.61271e-22
S100A4	-0.538363	8.90663	99.0122	2.53738e-23	4.63814e-22
NEXN	-3.47241	-0.0927743	98.9467	2.62267e-23	4.79095e-22
PPP2R5D	0.584357	6.98217	98.8938	2.69371e-23	4.91754e-22
ANKRD30B	4.03268	-0.245265	98.7974	2.8279e-23	5.15918e-22
TICRR	-1.26012	3.66002	98.7561	2.88758e-23	5.26467e-22
CTSH	-0.553084	7.84899	98.7408	2.9099e-23	5.30195e-22
FRAT1	-1.31942	2.40133	98.7318	2.92309e-23	5.32254e-22
NOTCH1	-0.559872	7.68905	98.6315	3.07503e-23	5.5956e-22
ETV7	-0.710396	4.61373	98.4691	3.33765e-23	6.06958e-22
ARHGEF1	0.559653	7.58235	98.4656	3.34347e-23	6.07626e-22
EMID1	-2.15385	0.915884	98.4031	3.45069e-23	6.2671e-22
GCLC	0.5926	6.63193	98.3592	3.52796e-23	6.40331e-22
LONRF2	-1.02834	4.05957	98.3483	3.54754e-23	6.43473e-22
SLCO2B1	-0.591625	6.8365	98.2982	3.63838e-23	6.59526e-22
HECTD1	0.573277	7.17288	98.2862	3.66054e-23	6.63117e-22
ASS1	0.707726	5.2458	98.259	3.7111e-23	6.71848e-22
KDM3A	-0.632279	5.94097	98.2366	3.75319e-23	6.79033e-22
RDX	0.59399	6.52563	98.2314	3.76304e-23	6.80378e-22
LOC154761	-1.96036	0.786181	98.2085	3.80694e-23	6.87877e-22
NKAIN1	-1.51658	1.45465	98.0974	4.02642e-23	7.27069e-22
RHEB	0.619562	6.17348	98.091	4.03953e-23	7.28971e-22
TTC39B	-0.60174	6.15415	98.0486	4.12679e-23	7.44243e-22
FAM78A	0.606857	6.45608	97.9761	4.28072e-23	7.71511e-22
NCF1B	-0.799058	4.04921	97.8441	4.57576e-23	8.24162e-22
GLIS2	0.894438	4.01889	97.7818	4.72188e-23	8.49938e-22
NRAP	-1.94626	1.20054	97.609	5.15217e-23	9.26316e-22
DIRAS1	0.756446	4.9084	97.6088	5.15275e-23	9.26316e-22
EHD1	-0.612098	5.85202	97.5987	5.17895e-23	9.30434e-22
ATG101	0.810486	4.39587	97.5677	5.26084e-23	9.44546e-22
BDH1	1.04224	3.6781	97.5102	5.41568e-23	9.7173e-22
PTPN14	-0.739915	5.50242	97.417	5.67653e-23	1.01789e-21
GNA15	-0.602839	6.22918	97.3671	5.82125e-23	1.04318e-21
MAP2K3	0.606882	6.06113	97.348	5.87782e-23	1.05265e-21
PLD4	-0.574268	7.25205	97.3093	5.99373e-23	1.07273e-21
CSNK1G3	0.738725	4.92659	97.171	6.42731e-23	1.1496e-21
HADHB	0.555821	7.67276	97.0981	6.66805e-23	1.1919e-21
SCAMP4	-0.629531	5.89372	97.0752	6.7458e-23	1.20504e-21
DUSP13	1.38496	2.40262	97.0177	6.94444e-23	1.23974e-21
SPP1	-0.456378	12.4842	96.9442	7.2068e-23	1.28577e-21
SIPA1L2	-0.597185	6.44706	96.9171	7.30631e-23	1.3027e-21
C1orf216	-0.825058	4.4401	96.8683	7.48834e-23	1.33431e-21
ADCY6	-1.16565	3.59104	96.8567	7.53239e-23	1.34132e-21
TMEM205	0.71144	5.06756	96.8288	7.63911e-23	1.35946e-21
RHOF	1.21645	2.84041	96.7072	8.12271e-23	1.44462e-21
SAMSN1	-2.46871	0.499676	96.699	8.1564e-23	1.4497e-21
BARD1	-0.927436	4.34049	96.5843	8.64303e-23	1.53522e-21
BLNK	-2.08158	0.760687	96.4658	9.17564e-23	1.62881e-21
NPAS1	1.77382	1.52654	96.4576	9.21376e-23	1.63455e-21
HR	2.62059	0.692739	96.4455	9.27008e-23	1.64351e-21
EME1	-1.47261	2.9096	96.4257	9.36327e-23	1.65899e-21
SHCBP1	-0.755962	5.5227	96.4133	9.4223e-23	1.6684e-21
CCDC170	-2.29547	1.47234	96.3925	9.52152e-23	1.68492e-21
BTN3A3	-0.702904	4.8987	96.372	9.62043e-23	1.70135e-21
ADRA2B	0.859327	4.33706	96.3707	9.62699e-23	1.70145e-21
IL17RA	0.545116	7.97294	96.3576	9.69094e-23	1.71168e-21
PMM2	0.692995	5.26597	96.3198	9.87777e-23	1.74359e-21
SEC22C	0.637682	5.97595	96.2974	9.98985e-23	1.76228e-21
TMSB10	0.502607	10.3098	96.2403	1.02819e-22	1.81267e-21
ATP5MC1	0.655655	5.71047	95.8221	1.26993e-22	2.23746e-21
PCDH20	-0.791002	4.31666	95.7242	1.33428e-22	2.34936e-21
ZEB1	-0.655122	5.58426	95.7045	1.34759e-22	2.37132e-21
SLFN12	-1.42561	2.28744	95.6811	1.36364e-22	2.39807e-21
BACH2	0.823102	4.43604	95.473	1.51472e-22	2.66211e-21
GNG11	-1.20325	3.15954	95.3978	1.57337e-22	2.76346e-21
NDRG4	1.5325	1.75714	95.3602	1.60346e-22	2.81456e-21
CD276	-0.513667	9.67053	95.3255	1.63181e-22	2.86255e-21
P2RY2	0.911514	4.05782	95.2965	1.65593e-22	2.90306e-21
PRR5L	-1.69893	3.01297	95.1665	1.76825e-22	3.09805e-21
GABRG2	1.21502	2.90504	95.1285	1.80248e-22	3.15608e-21
OTULINL	-1.02662	3.67738	95.1181	1.81197e-22	3.17072e-21
ERCC1	0.616166	5.99312	95.1056	1.82344e-22	3.18882e-21
C5	-1.20714	3.27991	95.0986	1.82991e-22	3.19816e-21
RGS14	0.633824	5.97408	95.0731	1.85366e-22	3.23767e-21
PHACTR3	-1.92019	2.49873	95.0171	1.90677e-22	3.32838e-21
MAP1LC3B	0.559074	7.21344	95.0068	1.91678e-22	3.34378e-21
ARAP3	0.617841	6.01742	94.9547	1.96787e-22	3.43078e-21
ST3GAL6-AS1	1.3402	2.4034	94.9081	2.01473e-22	3.51032e-21
SDC4	0.631762	5.59458	94.8324	2.0932e-22	3.6448e-21
MAPK13	0.666955	5.34676	94.8255	2.1005e-22	3.65525e-21
SND1	0.561668	7.22426	94.7907	2.13773e-22	3.71776e-21
PLCL1	1.67914	1.77659	94.7459	2.18668e-22	3.80056e-21
DAAM1	0.806318	4.56573	94.6759	2.26537e-22	3.93489e-21
SP140L	-0.642244	5.45828	94.617	2.33376e-22	4.05121e-21
MILR1	-0.684588	5.33604	94.5021	2.47312e-22	4.29048e-21
ARHGAP1	-0.602928	6.16929	94.4745	2.50777e-22	4.34793e-21
LIMS2	2.0743	1.10085	94.4445	2.54615e-22	4.41176e-21
GMPR	-0.985521	3.29519	94.4179	2.58053e-22	4.46861e-21
LINC00869	-0.790773	4.51542	94.3932	2.61288e-22	4.52184e-21
KLF7	0.656355	5.44139	94.3657	2.64952e-22	4.58245e-21
IL32	-0.96397	2.8549	94.3143	2.7192e-22	4.70009e-21
PEA15	0.526066	8.74943	94.2948	2.74606e-22	4.74362e-21
CUL4B	-0.623862	5.95294	94.272	2.77787e-22	4.79564e-21
PPP3CA	-0.662461	5.7094	94.1743	2.91827e-22	5.03496e-21
APOO	0.946674	3.61356	94.1483	2.95684e-22	5.09838e-21
TSC22D1	0.495081	10.4115	94.067	3.08078e-22	5.30886e-21
KLF12	1.11509	3.41675	93.9196	3.31883e-22	5.71558e-21
MAP1A	1.51263	2.10244	93.899	3.3537e-22	5.77212e-21
ANLN	-0.731779	5.76517	93.8032	3.51977e-22	6.05426e-21
CCL1	-1.06152	2.93662	93.7671	3.58455e-22	6.16195e-21
NXF1	-0.605723	6.0931	93.7485	3.61844e-22	6.21641e-21
IFI35	-0.539947	7.51195	93.6541	3.79516e-22	6.51606e-21
CCNE2	-0.80824	5.1845	93.6376	3.82691e-22	6.56658e-21
BATF3	-1.80271	0.943906	93.6283	3.8449e-22	6.59345e-21
VSIG4	-0.857064	4.45002	93.6052	3.89002e-22	6.66678e-21
TBC1D23	0.595203	6.30385	93.3761	4.36708e-22	7.47986e-21
TMEM167A	0.574731	6.89211	93.3517	4.42141e-22	7.56833e-21
SP3	-0.561996	6.99233	93.2846	4.57367e-22	7.82421e-21
TBX3	-1.01689	3.06434	93.2787	4.58732e-22	7.84282e-21
HLA-DRB6	-1.58181	1.11307	93.0198	5.22812e-22	8.93298e-21
NCF1C	-0.728678	4.34496	92.8816	5.60613e-22	9.57308e-21
CLCN5	0.762457	4.75552	92.8424	5.71833e-22	9.75878e-21
EIF2AK2	-0.532013	7.96443	92.7999	5.84226e-22	9.96425e-21
PPP2R1A	0.528202	8.30644	92.7319	6.0464e-22	1.03062e-20
PALD1	-0.887099	4.33948	92.7022	6.13787e-22	1.04558e-20
SCML1	1.18924	2.87449	92.6934	6.16526e-22	1.04962e-20
H3-2	-1.05034	3.63478	92.6399	6.33392e-22	1.07768e-20
NDUFAF4	0.75111	4.86409	92.6196	6.39947e-22	1.08818e-20
IL6ST	0.600049	6.07372	92.6155	6.41269e-22	1.08977e-20
DCK	-0.717063	5.37887	92.6136	6.4188e-22	1.09016e-20
NLRC3	-3.4234	0.943106	92.5514	6.62355e-22	1.12425e-20
TNFAIP8L2	-0.683484	5.13119	92.5226	6.72061e-22	1.13999e-20
TIPARP	0.677003	5.15466	92.5215	6.72433e-22	1.13999e-20
TOMM40	0.57077	6.83554	92.5023	6.7899e-22	1.15042e-20
NKX2-4	-1.11961	2.86511	92.4992	6.80047e-22	1.15152e-20
NINJ1	-0.579885	6.21149	92.4907	6.82971e-22	1.15578e-20
ELMOD1	2.3189	0.651126	92.3608	7.29288e-22	1.23342e-20
EGLN3	1.53349	1.21818	92.2904	7.55708e-22	1.27734e-20
CARS2	0.627359	5.85922	92.276	7.61222e-22	1.28589e-20
FARSA	0.572333	6.76976	92.2407	7.74889e-22	1.3082e-20
TMEM38B	0.680297	5.18102	92.1151	8.25651e-22	1.39306e-20
TENT4B	0.795175	4.40829	92.0959	8.33707e-22	1.40582e-20
RARG	-0.626535	5.76337	91.8849	9.27491e-22	1.56303e-20
MIER2	0.626457	5.56659	91.8487	9.44579e-22	1.59088e-20
KAZN	0.872513	4.12318	91.8383	9.49553e-22	1.5983e-20
PCGF2	-0.611268	5.81412	91.7999	9.68175e-22	1.62868e-20
SLC7A11	0.582988	5.98179	91.7377	9.99076e-22	1.67966e-20
SERPINB1	-0.744441	4.61431	91.6656	1.03612e-21	1.7409e-20
ITGA3	0.533612	7.94832	91.5967	1.07281e-21	1.80148e-20
RASL10A	1.56564	1.70659	91.5702	1.08728e-21	1.8247e-20
KMO	-1.08214	2.98055	91.5389	1.10461e-21	1.85269e-20
MTMR1	0.73918	4.8195	91.4945	1.12967e-21	1.89358e-20
SLC49A3	0.830459	4.11674	91.4821	1.13677e-21	1.90436e-20
LONRF3	0.733338	4.65141	91.4552	1.15232e-21	1.92927e-20
STON2	-2.13085	0.680217	91.4022	1.18355e-21	1.98038e-20
DMXL2	-0.569674	6.43021	91.3049	1.24318e-21	2.07892e-20
DEK	-0.576928	6.67647	91.2065	1.30655e-21	2.18361e-20
RB1	-0.544075	7.61531	91.1706	1.3305e-21	2.22231e-20
TEK	4.66193	-0.812879	91.1438	1.34859e-21	2.25121e-20
C1orf226	1.09104	2.94667	91.1166	1.36723e-21	2.28097e-20
SRGAP1	0.888378	3.90614	91.1074	1.37366e-21	2.29035e-20
KCNJ15	1.49773	1.8621	91.0805	1.39241e-21	2.32024e-20
GADL1	-2.81799	0.410487	90.9623	1.47812e-21	2.46162e-20
RELT	0.680711	5.12982	90.9555	1.48322e-21	2.46866e-20
AMD1	0.52989	7.95673	90.9461	1.49024e-21	2.47888e-20
HAL	3.27935	0.014179	90.8395	1.5727e-21	2.61452e-20
CIRBP	-0.589803	6.28792	90.8157	1.59175e-21	2.64462e-20
SPTY2D1	0.700287	5.04141	90.7361	1.65704e-21	2.75148e-20
FHOD1	-0.615065	6.179	90.5383	1.83122e-21	3.03892e-20
FITM2	1.15185	3.24039	90.2354	2.13402e-21	3.53935e-20
ACVR1C	0.965281	3.4471	90.1276	2.25348e-21	3.73527e-20
SMARCC2	-0.600607	6.05792	90.074	2.31531e-21	3.83552e-20
SRD5A3	0.685601	5.24136	90.0602	2.3315e-21	3.86008e-20
CXorf38	-0.638018	5.52007	90.0443	2.35029e-21	3.88891e-20
RAB39A	-0.95084	3.21821	89.7029	2.79278e-21	4.61838e-20
GALNT2	-0.524292	8.13814	89.6564	2.85915e-21	4.72536e-20
C2orf92	0.98955	3.42541	89.6214	2.91016e-21	4.80686e-20
SLC7A1	0.583277	6.5005	89.494	3.10362e-21	5.12341e-20
SFI1	-0.916179	3.89825	89.3253	3.37984e-21	5.57614e-20
ALOX15	-1.9112	1.62558	89.2248	3.55579e-21	5.86301e-20
DES	2.1364	0.392883	89.1646	3.66576e-21	6.04081e-20
LOC153684	-1.42402	2.0145	89.1282	3.73365e-21	6.1491e-20
SETBP1	0.971447	3.45475	89.1112	3.76589e-21	6.19859e-20
RRN3	-0.586636	6.26899	89.0356	3.91257e-21	6.43628e-20
LAMB3	0.657576	5.44336	88.9883	4.00718e-21	6.58782e-20
JUP	0.59295	6.17574	88.9873	4.00935e-21	6.58782e-20
LST1	0.539783	7.33307	88.9728	4.03872e-21	6.63223e-20
KCNQ3	-1.43744	2.94061	88.9492	4.08721e-21	6.70797e-20
DNMT3B	-1.51588	2.30764	88.9442	4.09755e-21	6.72103e-20
FKBP4	0.655819	5.31667	88.8786	4.23562e-21	6.94347e-20
RHOV	-2.02664	0.644176	88.8454	4.30739e-21	7.05703e-20
NARS1	0.525998	7.93114	88.8354	4.32902e-21	7.08837e-20
B3GNT2	-0.585144	5.96042	88.8053	4.39543e-21	7.19295e-20
SYN3	1.51807	1.87732	88.6717	4.70241e-21	7.69085e-20
EPHX4	-1.61439	1.96392	88.6529	4.74724e-21	7.75967e-20
ATP5F1B	0.503275	9.23073	88.5465	5.0096e-21	8.1838e-20
SLC35E4	0.92924	3.77598	88.4597	5.23425e-21	8.54585e-20
CA11	0.700776	4.71343	88.3368	5.56965e-21	9.08821e-20
NETO2	-0.634731	5.67504	88.2389	5.85201e-21	9.54343e-20
CCHCR1	-0.772943	4.60472	88.2114	5.93399e-21	9.67154e-20
TLR1	-0.593576	5.85934	88.1631	6.08056e-21	9.90473e-20
CANX	0.484372	10.1701	88.1443	6.13873e-21	9.99373e-20
ANKS1A	-0.585208	6.12648	88.1205	6.21275e-21	1.01084e-19
RUNX2	-0.695213	5.03258	88.077	6.35081e-21	1.03271e-19
EEA1	0.621624	5.63259	88.0575	6.41384e-21	1.04236e-19
SLC39A7	0.485408	10.1001	88.0424	6.46315e-21	1.04977e-19
RFLNB	-0.684186	5.40767	88.0316	6.49827e-21	1.05487e-19
OPHN1	0.973525	3.48874	87.9667	6.71517e-21	1.08945e-19
BEX1	0.643146	5.40421	87.8742	7.03634e-21	1.1409e-19
TBC1D9	0.672646	5.02672	87.8006	7.30308e-21	1.18348e-19
NTSR1	0.867227	4.20155	87.7804	7.378e-21	1.19493e-19
ERP29	-0.564156	6.59043	87.7303	7.56733e-21	1.22489e-19
AFAP1L1	1.21325	2.85593	87.7178	7.615e-21	1.2319e-19
CIP2A	-0.895214	4.52372	87.6854	7.74067e-21	1.25152e-19
ST6GAL1	-0.64221	5.47727	87.6152	8.02045e-21	1.29601e-19
ITPRIPL2	-0.552702	6.72255	87.5691	8.20953e-21	1.32581e-19
MYO1F	0.504374	8.85965	87.4574	8.68643e-21	1.40202e-19
SMCHD1	-0.563008	6.62609	87.3675	9.08982e-21	1.4663e-19
WHAMMP1	-1.9119	1.85533	87.2835	9.48431e-21	1.52868e-19
ZNF385A	0.55126	6.70344	87.2828	9.48732e-21	1.52868e-19
USP51	-1.1873	2.8394	87.2604	9.59576e-21	1.54527e-19
FUCA1	-0.733433	4.7201	87.2267	9.76054e-21	1.57091e-19
DRAP1	-0.56924	6.24662	87.1529	1.01315e-20	1.62969e-19
DUSP1	-0.701087	4.48198	87.1395	1.02e-20	1.63976e-19
VDAC1	0.513174	8.26561	87.0025	1.09315e-20	1.75637e-19
BCAP31	0.505824	8.57652	86.8436	1.18455e-20	1.90215e-19
PLXDC2	-0.544063	7.20518	86.806	1.20731e-20	1.93758e-19
DTL	-0.714622	5.48169	86.7432	1.24621e-20	1.99888e-19
FZD3	-1.12101	3.03415	86.6827	1.28496e-20	2.05987e-19
LAP3	-0.501674	8.59392	86.5278	1.38955e-20	2.22627e-19
PGBD5	0.594764	6.33387	86.4501	1.44525e-20	2.3142e-19
MAP4K4	-0.506625	8.59197	86.4098	1.47496e-20	2.36044e-19
FGD3	-0.743725	4.67424	86.3489	1.52106e-20	2.43284e-19
BRD2	0.462438	10.981	86.302	1.55759e-20	2.48986e-19
CCP110	-0.829678	4.44525	86.2654	1.5867e-20	2.53495e-19
MCM6	-0.611136	6.28353	86.0924	1.7317e-20	2.76505e-19
ACCS	-0.955429	3.60253	86.0356	1.78211e-20	2.84394e-19
AIM2	-0.659809	4.67162	85.9626	1.84908e-20	2.94914e-19
PFKL	-0.525066	7.57922	85.8647	1.9429e-20	3.09702e-19
S1PR2	-0.800694	4.12078	85.8208	1.98651e-20	3.16421e-19
SHOX2	0.53361	7.02027	85.82	1.98728e-20	3.16421e-19
MDK	-1.39356	2.16614	85.8009	2.00656e-20	3.19311e-19
FAM86DP	0.806272	4.29196	85.7684	2.03979e-20	3.24416e-19
AIFM2	0.72774	4.50325	85.6832	2.12961e-20	3.38512e-19
BNIP3	-0.811201	4.10012	85.6549	2.16029e-20	3.43196e-19
CLU	0.608316	5.62933	85.584	2.23907e-20	3.55449e-19
LOXL3	-0.954355	3.44078	85.5833	2.23994e-20	3.55449e-19
ZBTB33	-0.597644	5.84187	85.5741	2.25033e-20	3.56898e-19
TRIP13	-0.988438	4.06814	85.57	2.255e-20	3.57438e-19
ARHGEF6	-0.672008	5.26095	85.5429	2.28609e-20	3.62163e-19
ADAMTS7	-1.34767	2.3126	85.4419	2.4059e-20	3.8093e-19
ESCO2	-0.822083	5.00219	85.2896	2.5984e-20	4.11178e-19
SEMA4D	-0.784255	4.38516	85.2104	2.70457e-20	4.27739e-19
NSL1	-0.700901	4.96046	84.9926	3.01934e-20	4.77256e-19
SERPINB2	1.26136	2.0206	84.9863	3.029e-20	4.78514e-19
UTRN	-0.570945	6.3531	84.9196	3.13298e-20	4.94665e-19
DNAJC9	-0.790992	4.84172	84.9083	3.15089e-20	4.97215e-19
BMERB1	0.777363	4.38787	84.8949	3.17221e-20	5.00299e-19
ICAM3	-0.639978	5.30076	84.8478	3.24869e-20	5.12076e-19
U2AF2	-0.542194	6.93092	84.789	3.34683e-20	5.27251e-19
KCNQ1	-1.09873	3.24333	84.6651	3.56318e-20	5.61023e-19
ATP6V1G1	0.532718	7.0074	84.584	3.71226e-20	5.8417e-19
NMT1	0.557784	6.6225	84.5402	3.79543e-20	5.96761e-19
MCU	0.65668	5.05261	84.5396	3.79649e-20	5.96761e-19
CENPM	-1.24885	3.40197	84.504	3.86551e-20	6.07271e-19
FAM89A	0.750266	4.41526	84.4479	3.97665e-20	6.24385e-19
HMX3	0.907113	3.62371	84.4234	4.0263e-20	6.3183e-19
DOCK7	-0.811041	4.26528	84.3975	4.07934e-20	6.39797e-19
RTL6	0.564569	6.40149	84.3218	4.23847e-20	6.64387e-19
SPSB1	-0.520444	7.14951	84.3128	4.25774e-20	6.67038e-19
KRT80	2.4011	0.951927	84.2447	4.40698e-20	6.90037e-19
HS3ST3B1	0.566747	6.05284	84.1226	4.68755e-20	7.33561e-19
SERPINE2	0.764599	4.43043	84.113	4.71048e-20	7.36742e-19
PPP4R1	-0.573024	6.1398	84.0432	4.87974e-20	7.62793e-19
KIAA1522	0.623864	5.36906	84.0335	4.90354e-20	7.6609e-19
SPNS1	0.569556	6.15064	84.0135	4.95355e-20	7.73476e-19
CDCA8	-0.980399	4.26585	83.9931	5.00488e-20	7.81059e-19
PXK	0.763121	4.49566	83.969	5.06615e-20	7.90185e-19
VAV3-AS1	-1.4488	1.54677	83.9272	5.17428e-20	8.06605e-19
CAMK1	-0.511218	7.92954	83.8205	5.46134e-20	8.50886e-19
SGCB	0.740578	4.72146	83.7298	5.71743e-20	8.90295e-19
SRGN	-0.499927	8.2045	83.7177	5.75268e-20	8.9529e-19
TNK2	-0.570917	5.96029	83.6757	5.87622e-20	9.14014e-19
HBS1L	0.549711	6.78603	83.6339	6.00155e-20	9.32995e-19
DPP9	0.542773	6.78076	83.564	6.21743e-20	9.66024e-19
APOL1	-0.525168	6.79691	83.4653	6.53586e-20	1.01458e-18
EHMT1	-0.583432	5.97307	83.4649	6.53709e-20	1.01458e-18
ATF3	-0.50311	7.9443	83.3759	6.83813e-20	1.06072e-18
JADE3	-1.71748	1.75479	83.3582	6.89955e-20	1.06966e-18
AARS1	0.556726	6.56944	83.3499	6.92858e-20	1.07357e-18
TMEM70	0.592316	5.7775	83.3178	7.04184e-20	1.09052e-18
SLC20A1	0.47564	9.93556	83.2463	7.30102e-20	1.13004e-18
SKA1	-1.06779	4.10237	83.2421	7.31671e-20	1.13185e-18
ENPP4	-0.598936	5.66758	83.1946	7.49449e-20	1.15872e-18
MLF1	0.970898	3.50099	83.1824	7.54076e-20	1.16523e-18
CLEC10A	-1.40556	1.53808	83.1765	7.56323e-20	1.16807e-18
ABRACL	-0.541582	6.78852	83.1479	7.67357e-20	1.18446e-18
SDHD	0.556779	6.44548	83.1373	7.71472e-20	1.19016e-18
YRDC	0.66132	5.04195	83.0572	8.03386e-20	1.23872e-18
C12orf49	0.627946	5.42212	83.008	8.23628e-20	1.26924e-18
AREL1	0.555904	6.45361	82.9091	8.6584e-20	1.33356e-18
CPOX	0.769499	4.53523	82.8222	9.04733e-20	1.39271e-18
DNAJC3	0.528809	7.03467	82.698	9.63407e-20	1.48222e-18
WDR91	-0.718848	4.6743	82.6369	9.93652e-20	1.52792e-18
TRIM31	-2.35255	-0.262144	82.6222	1.00104e-19	1.53845e-18
MYOZ2	1.90693	1.29759	82.5719	1.02684e-19	1.57723e-18
PIMREG	-1.33796	2.94853	82.4758	1.078e-19	1.65492e-18
MAPKAPK5-AS1	1.12583	2.90232	82.446	1.09436e-19	1.67912e-18
AGRN	-0.492684	8.59677	82.4014	1.11933e-19	1.71651e-18
CYBB	0.529156	6.82744	82.3725	1.13583e-19	1.74086e-18
TIMM17A	0.536971	6.85574	82.3449	1.15178e-19	1.76435e-18
CERT1	0.559426	6.19102	82.3264	1.1626e-19	1.77997e-18
CTH	1.26589	2.18809	82.3186	1.16719e-19	1.78602e-18
ARHGAP25	-0.570393	5.90298	82.3102	1.17216e-19	1.79266e-18
PPP2R3A	0.636746	5.15906	82.2415	1.21363e-19	1.85508e-18
ARFGEF3	0.945621	3.74236	82.2283	1.22173e-19	1.86646e-18
CMTM3	-0.53352	7.0976	82.1455	1.27398e-19	1.94523e-18
HLX	-0.530904	6.7492	82.0651	1.32685e-19	2.02486e-18
PKMYT1	-0.837733	4.61866	81.9591	1.39995e-19	2.13526e-18
HACD4	-0.624355	5.45179	81.9043	1.43926e-19	2.19404e-18
PPP1R37	0.653968	5.02342	81.8094	1.51003e-19	2.30067e-18
SEC14L1	-0.531016	6.93886	81.7926	1.52292e-19	2.31908e-18
DANCR	1.0981	3.36158	81.7864	1.52769e-19	2.32508e-18
FCGR1B	-0.623953	5.10428	81.7784	1.5339e-19	2.33328e-18
ZFP36	-0.599455	5.45295	81.7059	1.59116e-19	2.41908e-18
PRMT2	-0.579218	5.90995	81.6845	1.60852e-19	2.44415e-18
SUCNR1	-0.729526	5.06334	81.671	1.61951e-19	2.45953e-18
NSMAF	0.535809	6.74233	81.663	1.62609e-19	2.4682e-18
LOC100129034	0.48841	8.84048	81.655	1.6327e-19	2.4769e-18
EFR3B	0.681121	5.11622	81.548	1.72347e-19	2.61321e-18
PARP9	-0.49856	7.88139	81.4723	1.79072e-19	2.71371e-18
EMX1	2.99665	-0.104241	81.4664	1.79611e-19	2.72043e-18
DESI2	0.568487	6.2471	81.39	1.86686e-19	2.82607e-18
SLC39A14	0.512235	7.43588	81.3883	1.86851e-19	2.82706e-18
ATP5MC3	0.510459	7.62212	81.3324	1.92207e-19	2.90654e-18
ZCCHC2	-0.50901	7.1952	81.3139	1.9401e-19	2.93224e-18
UHRF1BP1L	0.590721	5.72334	81.3107	1.94331e-19	2.93551e-18
NDUFB9	0.536951	6.72888	81.3086	1.94538e-19	2.93707e-18
SPTBN4	3.12044	-0.405794	81.2328	2.02136e-19	3.05015e-18
APOC1P1	1.72285	1.4741	81.2065	2.04841e-19	3.08932e-18
PIM2	-0.698061	4.4524	81.1986	2.05671e-19	3.10019e-18
TMEM123	-0.491196	8.37987	81.1947	2.06075e-19	3.10463e-18
ADGRE5	-0.49187	8.17844	81.097	2.16512e-19	3.26012e-18
GSTM3	0.784916	4.27602	81.0593	2.20686e-19	3.32121e-18
ULBP2	0.762797	4.27553	81.0408	2.2276e-19	3.35064e-18
BAZ1A	-0.506436	7.4656	80.9767	2.30096e-19	3.45915e-18
AVL9	0.568677	6.01579	80.9682	2.31088e-19	3.47221e-18
GEN1	-0.810041	4.54003	80.9293	2.35675e-19	3.53812e-18
MYO5A	-0.540234	6.93629	80.9289	2.35725e-19	3.53812e-18
ADGRG5	-2.38757	0.407967	80.9168	2.37171e-19	3.55794e-18
PDCD4	0.697567	4.86814	80.9103	2.3796e-19	3.56789e-18
PLEK	0.465292	10.0312	80.825	2.48454e-19	3.72326e-18
OSBPL5	-0.909015	3.66092	80.8138	2.49854e-19	3.74225e-18
CCND3	0.50139	7.86399	80.764	2.56238e-19	3.83583e-18
ANKRD44	-0.586556	5.85603	80.5708	2.82539e-19	4.22732e-18
CD300LB	0.784653	4.06324	80.5279	2.88741e-19	4.31782e-18
APAF1	-0.699908	4.9043	80.5264	2.88959e-19	4.31881e-18
ACSL1	0.497644	7.81735	80.3962	3.0863e-19	4.61037e-18
PLD1	0.78249	4.18322	80.3457	3.16615e-19	4.72715e-18
CALHM2	-0.654171	5.25174	80.339	3.17692e-19	4.74074e-18
ZNF331	-1.70865	1.89341	80.3285	3.1939e-19	4.76356e-18
DAPK1	-0.577743	5.7986	80.3118	3.22092e-19	4.80133e-18
PTDSS2	0.604343	5.52186	80.3108	3.22267e-19	4.80141e-18
TMEM192	0.636178	5.29444	80.2565	3.3123e-19	4.93234e-18
WDFY4	0.484036	8.77154	80.2412	3.33817e-19	4.96825e-18
PRTN3	0.526223	6.88557	80.2053	3.39933e-19	5.05661e-18
GTF2F2	0.641177	5.1142	80.1972	3.41317e-19	5.07453e-18
C1QC	-3.07939	-0.728337	80.1898	3.426e-19	5.09094e-18
SRXN1	0.552091	6.15495	80.1092	3.56859e-19	5.30002e-18
ENG	-0.480991	8.98729	80.0304	3.71384e-19	5.51285e-18
ECM1	-0.506867	7.51724	79.9653	3.83803e-19	5.69422e-18
ESYT3	2.06759	0.967182	79.8964	3.97436e-19	5.89339e-18
PFDN1	0.535934	6.65763	79.7045	4.37956e-19	6.49084e-18
HNMT	-0.557586	6.25433	79.5986	4.62047e-19	6.8443e-18
LOC100288637	-0.947048	3.95517	79.4715	4.92736e-19	7.29507e-18
MDFIC	0.564627	6.10428	79.4282	5.0366e-19	7.4529e-18
GNAI2	-0.485268	8.5223	79.3337	5.28334e-19	7.81393e-18
GAS7	-0.549798	6.23087	79.1923	5.67521e-19	8.38911e-18
SSX2IP	0.813767	4.19856	79.1898	5.68231e-19	8.3952e-18
ATMIN	-0.578758	5.77671	79.1037	5.93518e-19	8.76423e-18
FERMT2	-0.688701	4.78365	79.0797	6.00783e-19	8.86687e-18
AMER1	-0.942929	3.32622	79.0753	6.02117e-19	8.88193e-18
PLXNB1	-0.96112	3.49243	79.0453	6.11345e-19	9.01336e-18
MND1	-1.2781	3.18962	79.0292	6.1633e-19	9.08211e-18
TPST2	-0.544722	6.46522	79.013	6.21394e-19	9.15197e-18
CAMSAP2	0.528922	6.75715	78.9872	6.29579e-19	9.2677e-18
UGDH	0.57056	5.81648	78.9686	6.35507e-19	9.35009e-18
CTXN1	1.64321	1.4351	78.9526	6.40704e-19	9.42165e-18
ZNF496	-0.594904	5.51446	78.9221	6.50664e-19	9.56314e-18
FOXF1	1.81315	0.810023	78.8241	6.83737e-19	1.0044e-17
PTPRO	-0.943237	3.88484	78.8218	6.84528e-19	1.00504e-17
PDGFRL	-2.55184	-0.104498	78.7909	6.95316e-19	1.02035e-17
RDH13	0.666045	5.01626	78.7608	7.05999e-19	1.03549e-17
RSL1D1	0.516602	7.13507	78.6606	7.42723e-19	1.08879e-17
L3MBTL2-AS1	-1.37822	1.35122	78.6517	7.46071e-19	1.09313e-17
DENND2C	1.10195	2.79771	78.6376	7.51417e-19	1.10039e-17
EEF1AKMT4	1.623	1.77247	78.5353	7.9131e-19	1.15821e-17
THBS2	-1.59364	2.09027	78.5319	7.92686e-19	1.15963e-17
PXDC1	-1.28993	1.76722	78.5077	8.02458e-19	1.17332e-17
SMC2	-0.633191	5.76381	78.4599	8.22118e-19	1.20144e-17
BBS10	-0.827997	4.00801	78.4485	8.26871e-19	1.20776e-17
PRAME	-0.520171	6.87766	78.4412	8.29927e-19	1.2116e-17
MDH2	0.517113	7.02826	78.425	8.3674e-19	1.22091e-17
CRISPLD2	-1.26437	1.96305	78.4188	8.39389e-19	1.22415e-17
LRATD2	-1.36202	1.92402	78.3093	8.87197e-19	1.2932e-17
IRAK2	-0.839312	3.37641	78.2648	9.07415e-19	1.32199e-17
NR2F2	0.613098	5.29692	78.2429	9.17527e-19	1.33604e-17
UHRF2	0.582126	5.83874	78.2088	9.33483e-19	1.35857e-17
SEPTIN6	-0.691641	4.64251	78.1663	9.53796e-19	1.38742e-17
ILK	-0.524258	6.76249	78.1579	9.57859e-19	1.39261e-17
ZBTB47	0.629308	5.17529	78.1547	9.59381e-19	1.39411e-17
FGD1	1.10963	2.81908	78.0882	9.92237e-19	1.44111e-17
ETS2	-0.647133	4.6881	77.9718	1.05244e-18	1.52777e-17
SBF1	0.505765	7.29791	77.9704	1.05319e-18	1.52807e-17
SNX18	0.548232	6.26603	77.9641	1.05655e-18	1.53216e-17
LRRC37A3	-0.893101	3.39373	77.8693	1.10851e-18	1.60668e-17
ACACA	0.518276	7.13024	77.8361	1.12728e-18	1.63306e-17
CENPA	-1.34753	3.17725	77.7777	1.16105e-18	1.68112e-17
GPR42	-8.13025	-0.969368	77.6286	1.25209e-18	1.812e-17
ALDH3A2	0.675028	4.9387	77.6238	1.25512e-18	1.81547e-17
SETD7	0.545783	6.36628	77.6164	1.25984e-18	1.82135e-17
EMP3	0.507169	7.11895	77.4571	1.36561e-18	1.97326e-17
MIER1	-0.568284	5.70024	77.385	1.41636e-18	2.04555e-17
DGCR5	0.976419	3.5527	77.3477	1.44338e-18	2.0835e-17
LINC01000	-0.647025	4.89106	77.3052	1.47474e-18	2.12768e-17
ARL6IP6	-0.766935	4.4804	77.2351	1.52801e-18	2.20342e-17
BMP8B	-0.610075	5.82563	77.1267	1.6142e-18	2.32652e-17
ZNF365	2.10014	0.717277	77.0995	1.63659e-18	2.35759e-17
HAPLN3	-0.673296	4.19583	77.0878	1.64631e-18	2.37039e-17
BPI	-1.16624	2.43055	77.0715	1.65994e-18	2.38879e-17
NECTIN1	0.959858	3.60375	77.0221	1.70192e-18	2.44796e-17
TRIM56	-0.536223	6.19458	77.0039	1.71769e-18	2.46939e-17
DDR1	0.765152	4.16703	76.9759	1.74225e-18	2.50342e-17
BLM	-0.891743	4.35111	76.9292	1.78389e-18	2.56084e-17
TNFAIP8L1	0.625139	5.00795	76.9291	1.78402e-18	2.56084e-17
RPS6KA2	0.493836	7.54272	76.8862	1.82315e-18	2.61568e-17
ZC3H18	-0.604133	5.40933	76.7251	1.97802e-18	2.83643e-17
BTN3A2	-0.561099	5.69624	76.7109	1.9923e-18	2.85547e-17
SLC8B1	0.625879	5.02012	76.5302	2.18312e-18	3.12737e-17
MGST1	0.598572	5.45728	76.4523	2.27096e-18	3.25155e-17
CSRNP1	-0.527178	6.18892	76.3038	2.44825e-18	3.50363e-17
MGP	-2.6818	0.337945	76.1921	2.59075e-18	3.70567e-17
TRPA1	3.11718	-0.442812	76.1581	2.6357e-18	3.76807e-17
SRPRA	0.497189	7.44953	75.9491	2.92976e-18	4.18635e-17
SLC25A32	0.568328	5.77947	75.9365	2.9485e-18	4.21099e-17
NASP	-0.529903	6.70306	75.9323	2.95488e-18	4.21798e-17
RFC3	-0.835567	4.5288	75.9189	2.97497e-18	4.24451e-17
KIF11	-0.76467	5.02417	75.8908	3.0175e-18	4.30303e-17
CYLD	-0.529589	6.10877	75.8896	3.01939e-18	4.30354e-17
LSG1	0.591156	5.54183	75.8756	3.04087e-18	4.33197e-17
BRD3	-0.67363	4.95093	75.8647	3.05776e-18	4.35385e-17
GOLGA4	0.529504	6.44345	75.8632	3.06008e-18	4.35495e-17
PTPN3	1.0321	3.26399	75.8615	3.06271e-18	4.35651e-17
MARCHF1	-1.51574	1.2701	75.6495	3.40971e-18	4.84765e-17
SECISBP2	0.598384	5.38428	75.6157	3.46851e-18	4.92877e-17
MCM5	-0.532866	6.79264	75.5293	3.62352e-18	5.14646e-17
HK3	0.768185	3.9665	75.4811	3.71307e-18	5.27099e-17
SMPDL3A	0.529205	6.20277	75.4391	3.79298e-18	5.38174e-17
ZFYVE28	-0.869197	3.4284	75.4065	3.85612e-18	5.46857e-17
AFAP1	0.583381	5.46275	75.3814	3.90541e-18	5.53569e-17
SASH1	-0.553585	6.28053	75.2262	4.2246e-18	5.98513e-17
ELL2	0.493554	7.22274	75.1137	4.47219e-18	6.33273e-17
NDUFV1	0.531435	6.42669	75.1119	4.47639e-18	6.3355e-17
GPR65	-0.59307	5.4069	75.0925	4.52046e-18	6.39467e-17
[truncated: 26,279 more rows]

## Sheet: DEGvsChIP
DEG_specific	ChIP_specific	Overlapped
CHODL	Cdc42bpg	CXCL10
LIF	Tnfrsf26	ABCG1
IGFN1	Pea15a	LBH
CHIT1	Zfyve21	CD163
FCGBP	Ctgf	MAFB
COL6A3	Mtmr10	MYD88
THBS1	Folr2	C5AR1
SLC7A8	Amz2	MSR1
GM2A	Cisd2	C5AR2
MMRN2	Mex3b	APOC1
ATP6V1C2	H2afz	MMP8
LGI2	Cd207	CDH23
MYLK	Synb	TLR2
CCN1	Lalba	RCAN1
INHBA	Eif2b5	GBP4
TIMP3	Eapp	RSAD2
IFI44L	Nlrp1b	FBP1
TIE1	Sypl	APOE
LINC01010	Smdt1	TMEM158
HERC5	Naga	TRIB1
TM4SF1	Mtmr3	CSF1
GAL	Fam109b	CEMIP
TRIM22	Cnot2	DCSTAMP
SCD	Fhit	CMPK2
INA	C330027c09rik	EFNB2
TNFSF10	Zfp169	STAC2
RRAD	Zfp871	NPR1
FCRLA	Rps29	PSD3
S100A9	Zp3	IFIT2
SLC5A3	Maml2	GMFB
ISG20	Cd300ld	CLEC5A
TSPAN17	Msl3	IFITM1
TIMP1	Klhdc9	NDRG2
RAI14	Chchd5	CCL2
CLIP4	Cant1	SLC29A3
LOXL4	C1qtnf1	IFIT1
NAV3	Armc3	AP2A1
MLPH	Tgfbrap1	SLC16A6
SNCB	Cd200r1	NR1H3
ADGRG1	Ai597479	CXCL11
CYP1B1	4933427d14rik	ITGB5
OAS2	Kcnk5	CREG1
PDGFRB	Dthd1	WBP1L
PDGFA	Ang6	PLAU
APOBEC3G	Frmpd4	MFSD12
NT5DC2	Fndc7	MMP19
CD52	Cep170	CCL7
CCL20	44621	GLIS3
PDP1	Krtap12-1	STEAP3
C3	Gm10142	SGK1
CCL8	Gm10024	XIRP1
SECTM1	Blvra	CD300A
DDIT4L	Znrd1as	IL1RN
RTN4R	Znrd1	CD93
METTL7B	Trim30a	JAG1
NPTX1	Loc547349	ACP5
PTGDS	H2-l	UBA7
DLG5	H2-d1	CDK5RAP2
ADAMTS15	Srrd	PLEKHA4
TNFSF13B	Rap1a	ABCA4
GSG1L	Ccdc54	BABAM2
CPA4	Stard8	DDX58
ZNF618	Slfn10-ps	PHLDA3
MRAS	Rars	ABCA1
STAT2	Ubap1l	RGS2
ADARB1	Kdm2b	CHRNA9
MERTK	Ubb	LSP1
RDH10	Larp7	IER3
TEAD3	Ing2	SLC9A9
DUSP2	Ppp1r1a	WIPF1
AGO2	Serpinb9c	TRIM2
ZNF532	Gnrhr	SPRED1
FANCE	Cacna1d	ZNFX1
SBSN	Zfp566	TBC1D2
GPAT3	Zfp260	DGAT2
TMEM119	Tcp11l1	MX2
GBP1	Pin1rt1	CD109
IFI44	Gsap	LRRC8A
CXCL8	Hist1h3h	TMEM106A
LINC02009	Hist1h2bm	NDRG1
PLXNC1	Hist1h2bl	OAF
CHI3L1	Hist1h2ai	VGLL4
MRC2	Gm7244	PYROXD2
NEAT1	Zfp248	RAB7B
VGF	Tma16	HSPB7
HLA-DMB	Pon3	TMEM104
MFSD2A	Cenpc1	SLA
SELENON	Tial1	FAM43A
LPAR6	Mkln1	ZFP36L2
TRANK1	Dntt	SMIM14
KCNF1	Prr13	DTX3L
SMOX	Ppm1h	LACC1
CCL22	Amhr2	PRKAA1
GFOD1	Rab5a	COL13A1
HAP1	I830077j02rik	ANXA2
IFI16	Ect2	SERPINE1
HMGCS1	Osm	MEF2C
MAP3K7CL	Banp	SYNGR1
IL36B	Tmem50b	PPARD
CLMP	Smo	CTSC
PNOC	Ralgds	HK2
METTL7A	Cap1	TFRC
TFEB	Stag2	IL1B
TMEM255A	Clint1	CEBPA
FZD6	Retreg3	ABTB2
RAP1GAP	Arl5c	P2RX4
TSPAN7	Scarb2	TM4SF19
COL5A3	Borcs5	MMP14
MRPS6	Ap3m2	NCF2
ARHGEF10	Wdr83os	NCOA7
B4GALNT3	Wdr83	IFIT3
AHCYL1	Wdr4	SSBP3
SHB	Ube3a	DMKN
MAP1B	Snw1	RAB1A
TRDN	Slc40a1	OCSTAMP
PINK1	Sct	TRIM14
RNASE1	Ptp4a2	ITM2C
IL36RN	Olfr222	TXNIP
STRA6	Nlrp1a	EPSTI1
HEY2	Hoxa1	SH3BP5
SOX13	Dhps	ARL4C
MYH9	Coq2	AIF1
STC1	Cdhr5	CASP1
DENND3	Tango2	SLC12A8
LINC02158	Spef1	TDO2
DOCK3	Rsl1	PTK2
CRABP2	Pcbp2	FZD7
USP18	Nipbl	NUMBL
MT2A	Lemd1	PKDCC
G6PD	Haus6	FTH1
TNS1	Fbxo18	PDE4DIP
NECTIN3	Fam26e	CCL5
ATP10A	Espn	PSMB9
DDAH1	Ddx4	CAMKK2
PAX8-AS1	Bcat2	CFL2
MYOSLID	Arvcf	ALCAM
SLC4A7	Ankrd16	GSDMD
NCF1B	Adamtsl4	GYPC
ABCA13	A4galt	PARP14
MYL12B	1700037h04rik	GIMAP6
ZNF703	Zfp445	RASA1
DLL1	Ube2h	ARHGAP27
LINC01605	Scimp	ZC3H12D
ARHGAP5	Rnls	C3AR1
TPRG1L	Rabep2	STAB1
ISG15	Ptrh2	CX3CR1
TRPS1	Nln	SAMD9L
XYLT1	Cd19	RPS6KA1
AREG	Tpp1	GPNMB
SERPINA1	Tac4	FFAR2
H1-2	Sssca1	SQSTM1
APOBEC3F	Setd5	HELZ2
LOC102723996	Phospho2	FGL2
SP110	Nuggc	VSIR
PPP1R3A	Ist1	IFI35
CTSG	Gal3st3	XRN1
SERINC5	Fam89b	IFNGR2
EXTL1	Elp3	PLSCR1
COL4A2	Dhx16	ACSL1
TMEM184C	Cfap20	BATF2
APOL6	Ccdc173	ALOX5
MTHFD2L	Angpt1	TGM2
SPTBN5	Zfp157	MX1
GOLGA8N	Twf2	ARHGEF3
GFI1	Siglecg	ARID5B
ITGA7	Rhbdd1	KLF9
CDC20	Picalm	PARP10
GOLGA8M	Pde10a	IGFBP4
IPCEF1	Mrpl35	FGR
IL4I1	Mcrs1	SLC9A1
CARMIL3	Kbtbd4	PLCXD1
OAS3	Id2	ATP8B4
TBX15	Heatr6	B4GALT1
PCDH11X	H2-ea-ps	PAQR5
CCN4	Gnb2	ABHD2
ITK	Gapvd1	ITGA6
SDC2	Gan	GBP3
SH3RF1	Galk2	GPR84
OASL	Eif3e	TNFSF14
IL6R-AS1	Ccdc89	FCRLB
MGLL	Nwd1	ATP6V1A
CORO2B	Ncaph	CEBPB
LILRB3	Meis1	ADAP2
NES	Fam120b	ZC3H12C
LIPG	Clec12b	NCF1
PTK7	Atp5l	SLC31A2
SGMS2	Zkscan4	FADS1
RHPN1	Zfp932	CCRL2
G0S2	Zc2hc1b	IFITM3
KCNG1	Ube2i	DIRAS2
HSPB3	Tpm1	NFKBIA
LTA4H	Tmem260	IRF7
APBA2	Tecpr1	PTPRE
A2M	Spata17	KDR
RMDN3	Slc14a1	IFITM2
SNAI3	Rabgap1l	GBP5
DDIT4	Ppp1r11	KLF3
DEPP1	Gpatch2	TXNRD1
NCF1C	Fam69a	AKNA
ETV7	Dars2	BST2
LILRB4	Arhgap32	QPCT
SAMD9	Ap3s2	PPBP
COL27A1	Zfp715	CYCS
ATF5	Ywhab	PGGHG
SLC6A8	Trpm1	NREP
INHBB	Thoc1	RGS1
GOLGA8J	Slc38a9	TSC22D1
TBX21	Senp1	TM6SF1
SHFL	Pfkm	RFTN1
LFNG	Naa10	SLC6A12
DIXDC1	Itfg2	OLFML2B
LTBP1	Igsf9	SNX9
CD226	D3ertd751e	SVIL
ZNF516	Csnk1g2	CYSLTR1
MARCKSL1	Atg5	GALM
CYP26B1	Zfp97	RIN2
VASH1	Zfp395	NCKAP1
RNF213	Unkl	S100A16
TSPAN5	Ticam1	PLA2G4A
MARCKS	Sumf1	TAP1
HMGN2	Rnf114	CD14
LINC00504	Prss58	GDF15
LINC00622	Ppp6r2	LRP12
ATP9A	Ncstn	CARNMT1
CPNE6	Moxd2	CD47
ANKH	Lpl	PKM
MELTF	L3mbtl3	CDC42
MTMR9	Esrp2	BASP1
RXFP1	Copa	RBCK1
KPNA6	C130050o18rik	ICAM1
SNTB1	Atp6v1e2	SLFN5
ANXA2P2	Akt3	ATP6V1H
STXBP1	Adrb1	CHST11
SLC2A4RG	Upb1	HBEGF
HOMER2	Spen	IL3RA
FTL	Pde6a	SPATA13
CDK6	Kcnj10	ARL13B
PPFIBP1	Catip	STXBP5
MTARC1	Ap1m1	TCF4
CLDN12	Vapb	CASS4
SREBF1	Slc28a2	MTUS1
TOR1B	Il21r	SEMA4D
ELP1	Eif3b	EMP1
EPB41L4B	Slc2a9	PTPRC
ATP2B4	E030030i06rik	THBD
SPHK1	Sirt6	SLC43A2
TXN	Qprt	IFIH1
YES1	Otud1	OXR1
CREB3L2	Hnf1b	SYT3
PODXL	Ankrd24	VIM
FSCN1	Tomm7	KCNK6
APOBEC3B	Rab11fip5	THUMPD1
ELK4	Oacyl	SMAP2
AGER	Flot1	AIM2
DROSHA	Tmem26	SMAD3
LAMP3	Nipsnap2	DAPP1
RPLP0P2	Myo18a	MAP3K9
GOLGA8R	Thsd1	TNPO1
ST8SIA5	Fer	GNG11
H2AZ1	Ctse	SIPA1L1
LOC105371763	Nox1	MYO7A
MYO15B	Gm11545	STAP1
LOC100130992	Cnbp	TANK
PPP1R16B	Best3	NFIL3
ECRG4	Rasgef1b	GBE1
APLN	Grk2	MSMO1
SNN	Wdpcp	PI4K2A
GPX4	Rassf4	MICALCL
CERCAM	Prkar2a	FGD2
TRIM24	Phf5a	OLFML3
SLC2A3	Impact	CTDNEP1
TBC1D5	Bc004004	CPNE2
PEX5L	Zcchc8	PLA2G7
PYGL	Ovol2	INHBE
TTL	Il1rl1	ATP6V1B2
KANK4	Olfr460	SLC38A3
GOLGA8O	Map2k2	LGALS3
VWF	Eef1a1	SP100
DIRC3	Creb3l3	GLIS2
TNFRSF21	Rnf141	EPS15
ABCD1	Kbtbd7	CTSK
PPM1K	Plscr3	PNPT1
CYP51A1	Washc2	CSK
STING1	Tmcc1	ARRDC3
ANTXR1	Mgl2	RAB8B
IRS1	Eri3	NPAS2
HMGB2	E2f2	SETD7
USP25	Synpo	PLEKHA3
CENPF	Supt5	SLC38A2
LINC02392	Rtcb	PPDPF
PARP12	Rps16	EHBP1L1
PCOLCE2	N4bp2l1	TRIM56
XKRX	Myoz3	SLC25A40
SPTBN2	Gk	ST8SIA4
SLC25A23	Fam13a	LST1
BTG2	Bin2	MCUB
COL8A2	Srrm1	NUMB
TRNP1	Eml2	VPS33A
KLHL29	Trove2	RCN3
KCNIP2	Pira7	EFR3B
RCAN2	Pira6	PARP9
AP1S1	Pira4	RGL1
OSTM1	Pira11	EHD4
JADE2	Nxph3	TRPM2
RAB11FIP4	Gm14548	SLC11A1
ATG9A	Tex14	FBLIM1
SORCS1	Sycp2	KIF2C
TWIST1	Rfxap	BIN1
SYP	Ppp1r3d	NPC1
RASAL3	Macrod1	BCL2L11
ANOS1	Hist2h2be	IQGAP3
HSH2D	Hist2h2ac	DUSP3
ALDH1A2	Hist2h2ab	DAG1
LINC01094	Gast	ANTXR2
SDF2L1	Fam217b	PDCD1LG2
BTG1	Ggta1	LGALS3BP
TOP2A	Ago4	GALNT1
APOL1	Zfp759	GLA
INPP4B	Ppp1r1c	SLC1A2
DMBX1	Gm4951	C2
BMP1	Fbxo2	DYRK2
THRA	Ell	GPSM2
ACO1	P2ry13	ETS1
SEMA7A	Gpr82	SYT2
HSPA5	Btnl2	CNP
GRAMD4	Ing5	LDLRAP1
TSPOAP1	Fam84b	RUNX1
CCN2	Tuba8	MAP3K20
ATP1B3	Thumpd3	PRR5L
SELPLG	Arap2	RBM8A
SPINT1	Hist4h4	TKT
SLC30A3	H2afj	PDE7B
ICOSLG	Glrx	IFITM10
LOC100419583	1190002n15rik	UBE2Q2
FGFRL1	Zfp444	TMSB4X
TRIM54	Lrrc27	HSD3B7
CARD16	Ctf2	VSTM4
PMEPA1	Tmco1	XAF1
OAS1	Plekhm2	SLC37A2
TIAM2	Pigyl	SEMA3C
UNC93B1	Ubc	TNFSF9
NAMPT	Smim26	PSAP
PGBD5	Mthfsl	SYNE1
YOD1	Dtd1	PRNP
CD274	Mpp1	SIGLEC1
EVC	44623	TEP1
IFI30	Gm14326	PINLYP
H1-0	Sema3b	SRPRB
NBEAP1	Ambra1	BRCA2
EGR3	Wfdc16	ANXA5
LAMC2	Sgf29	FFAR3
NID1	Rilpl1	GCLM
SASH3	Lpcat4	POLA1
MCEMP1	Iars	TUBB4A
PTP4A3	Dolpp1	RGMB
P2RY8	Alox12	IGF1R
GPR183	Trim30d	RGS14
TMEM62	Pxk	ABCG2
CHPF	Tgm6	ANKRD44
CLIP2	Srpx	UBTD1
HLA-E	Slco5a1	DHRS3
SLC44A2	Shcbp1l	ANKFY1
RRN3	Rtkn2	RFX8
ZFP36L1	Ropn1l	MYOF
MMP7	Prss57	ATXN1
MALAT1	Pgp	SSH1
NUP210	Palm	HMGA1
LOC100128993	Npc2	R3HDM2
LYPLAL1-AS1	Nim1k	NMI
RET	Mlst8	DST
TMEM215	Lyzl4	FCGRT
IL13RA2	Isca2	ELL2
APLP2	Ifna14	GNPNAT1
HTT	Havcr1	ARL15
CES1	Ccdc110	PLEK
BHLHE40	Caskin1	TNRC6A
MYH14	Bricd5	CD84
ZBED1	Akap4	RHOBTB2
BEX1	Acot5	GJA1
UHMK1	Trmo	C1GALT1
EDNRA	Scly	CYP27A1
EXD3	Rnase6	DHX58
SCAMP1	Rffl	GTPBP2
GMCL1	Rangap1	PLCB2
GRK6	Gpr19	PLK2
EGR2	Gng10	GPD2
LRP8	Gm45915	FRMD4B
WHAMMP2	2010315b03rik	EXT1
ZEB1	Znrf4	PRSS22
MPRIP	Zc3h14	ATP6AP1
SLC38A5	Vps26a	ARHGAP31
RGMA	Uba3	CSDE1
RNF220	Qk	UCN2
GABRD	Ptgs2	DHRS9
RICTOR	Olfm5	DOK3
KLHL2	Mrpl41	COTL1
SEPTIN11	Jrkl	RBM43
TRPM8	Ing3	PTPN18
FER1L6	Dlg1	LIMK1
CERS4	Ccdc82	GRASP
PDGFRA	Bpifb9b	CD63
BCR	Atf1	MBOAT7
TDRD9	Ai182371	TMEM229B
SORT1	Srp68	MIER2
AMPD2	Rpl15	PLEKHG2
SIGLEC16	Rab6a	STEAP4
PDHX	Odf2l	ACCS
OSBPL5	Myh7b	DNAJB11
STK38L	Lyst	GSR
MEF2C-AS1	Hrh1	GPR137B
PPARGC1A	Hepacam2	PCDHAC2
TESC	Ercc6	CD44
CALCOCO1	Dnmt3a	EMILIN2
ITGA11	Smim12	PFKFB4
THBS2	Pycrl	HDAC3
MOV10	Klhl33	PDXDC1
SIGLEC11	Jchain	MYO1G
ZNF107	Gstm7	MYB
FKBP9	Gstm6	TRIM25
CCHCR1	Ghrl	CREBRF
CLU	B9d2	IRF8
CMYA5	Atp6v0d2	HIF1A
MREG	Zfp202	UST
COMMD6	Ypel5	FARSA
ADCY8	Uprt	NRAP
NIBAN2	Sp2	PDE4B
APBB1IP	Olfr986	POLE4
ADGRB1	Nt5dc3	ITGAL
DGCR5	Notch4	DUSP13
MEAT6	Nbdy	FAM53B
SERPINH1	Cyp51	TBC1D2B
LINC01000	Chmp1b	SCAMP4
ATP1A1	Abhd17b	RTP4
BAG3	1110059e24rik	CD4
ATP1A2	Recql	ANXA1
KLF13	Plac8	PUS10
BTN3A1	Pask	MKI67
ATP6V1F	Nsd3	PLEKHF1
GGT1	Nab2	LMO4
LILRA2	Mbp	CDS1
FCAR	Letm2	DENND2D
FANCD2	Hmga1b	IFNAR2
CXorf21	Anp32a	U2AF2
HS3ST3B1	Akr1b10	UBASH3B
RASGRF1	Acbd5	ITSN1
NTRK1	Ai413582	CCSAP
CELSR1	Zfp335	JCAD
FAM102A	Slc25a25	CD36
CRLF1	Scml4	SPIRE1
ZNF385A	Pold3	NSF
STXBP5-AS1	Naif1	AVPI1
ATP6V1E1	Matn3	LITAF
POP4	Gpr119	ATP13A3
GNB4	Defb45	SESN2
FCGR1A	Defb36	HAVCR2
ASMTL-AS1	Clip1	SORBS1
NT5E	Ccdc58	LRRC8B
HERC6	Stk25	ARC
LOC100996724	Stat3	STX3
IFI27	Slc25a20	SLC19A2
LINC01181	Rhoj	PAN2
DMP1	Lrrc4	SLC35F2
RGS20	Krcc1	ARID3A
PLCD3	Cd72	PGAM1
CA11	Actr3	CCDC92
UHRF1	A230050p20rik	TSPAN14
ABCB1	Rit1	GOLT1B
PCDH11Y	Tpra1	ATP6V0C
ACER2	Rtn3	LRMP
NISCH	Jmy	NOTCH1
SERPIND1	Dnah7b	SPRY2
FLVCR2	Atl3	JMJD1C
C6orf223	Zfand5	PROC
PPL	Phc2	RIN3
ATMIN	Med7	TMEM123
AVL9	Use1	IQGAP2
MBNL1-AS1	Ocel1	SPNS2
ABCC6	Tmem65	ARL6IP5
ABCB9	Dazap1	FADS2
FGD5	Cd300ld5	MGAM
ARL5A	Cd300ld4	PRR11
CHTF18	Slc27a1	DNMT1
RNF19A	Pcca	DBN1
ASS1	Nol3	NANOS1
CDA	Sirpb1b	MINDY2
AOX1	Gpr107	RGS16
ASPM	Elmo1	SFXN1
FASN	Sde2	SNX30
MAP3K2	Lars	RAB3IL1
PSKH1	Fam222b	CARD6
ATXN10	Eral1	CREM
ZNF385B	Tctn3	EIF2AK2
TTC9	Fscn2	RUBCN
CHKA	Faap100	KAT2B
DDAH2	Tef	HDAC9
RNF122	Olfr110	MMP13
TRIM5	Olfm2	PHF2
MFSD3	Ncmap	CRLF3
SLC16A2	H2-m2	ADCY7
SOX4	Clec4b1	CTTN
P2RY2	Ubl3	LIMD1
FBN2	Robo3	CDC42EP3
SLC44A5	Ddx3x	TUBB4B
ADCY6	Aldh18a1	PML
ITGA2	Zfp677	FGD3
LAP3	Tmem72	LDLR
PRXL2A	Dppa3	BDH1
HEXIM1	Syndig1l	NRM
SLC28A3	Mob2	GTSE1
ADAMTS7	Gm5544	EVI2A
LONP1	Trim65	CMIP
MRPL37	Scn5a	PPARGC1B
COX5B	Rhoc	CCNB1
MSH5-SAPCD1	Mrpl38	SERPINB2
GEM	Gart	WDFY4
SV2B	Ddhd2	TMEM189
MAST4	Atp5g2	SECISBP2
NEDD9	Olfr1513	TPM4
EPOP	Erbin	MAP3K4
ADAMTS14	Tm9sf2	COQ10B
HTR7	Syce3	NAPRT
GYG2	Sh2b3	BMP2K
CHROMR	Rgs18	IRF2
SPATC1L	Cstad	CNTRL
CIAO1	Cib2	SLC29A1
FYB1	Ensa	GAS7
GRID1	Clec4a3	XDH
CXorf38	Fgf9	IRF2BPL
MDK	Sardh	KIFC1
ERFE	Mrpl24	FNIP2
ATP6V0B	2210010c04rik	ACO2
PHF19	1110059g10rik	PDP2
COL22A1	Samd4b	RB1
PLK4	Ccdc117	PLS1
HYOU1	Fip1l1	NCDN
MSC	M6pr	LGALS9
PCSK5	Bcl10	SCAMP5
NT5C3A	Bc030867	FAIM
FEZ1	Exosc3	LRIG1
ITM2A	Dynlt1b	RGS3
CPOX	Trcg1	S100A8
EFR3A	Neurod1	IL1R1
C5	Lifr	SGSH
SLC25A22	1700013d24rik	KRT80
LOC606724	Tmem30c	SPTY2D1
CBX1	Isy1	ALDH9A1
F2R	Galnt6	FMN1
EIF4G1	Mrpl1	TXN2
VANGL1	Dcaf1	LRRFIP2
NCALD	Mavs	TMEM151B
LGR4	Ero1l	CELF2
POLE	Calr4	SYNE3
VAT1	Arl14	CANX
LILRB1	Ndufv2	PLSCR4
ESPL1	Hist2h4	MYO1F
P3H1	Hist2h3b	IRAK2
PPP2R1A	Hist2h2bb	EPG5
ADGRD1	Josd1	PHLPP1
THSD7A	Eya3	GLO1
RND3	Pdlim5	FITM2
LY6G5B	Hcls1	HACD4
FCMR	Dnaic1	GOLGA7
UBE2L6	Dhx15	PIK3AP1
LYSMD2	Car6	YRDC
GFPT2	Arih2	TGFBR1
KBTBD11	Ankrd33	CLIC1
RHEX	Zc3h6	TGFB1I1
LOC100506585	Wdr70	EPS8
PRMT2	Ube4b	TCF12
NRIR	Tmem203	PRTN3
OVCH1-AS1	Snrpd1	PIM1
DDR1	Rhbdf2	LNPEP
MACF1	Olfr109	LCP2
SP140L	Nup155	CMKLR1
PRR16	Ndor1	SLCO2B1
TMEM167A	Engase	KLF6
RAB3B	Dnajc15	XPOT
MTSS2	Dbi	SLC27A3
LTBP2	Cnot10	NUFIP2
SEC23A	App	TRPM4
FAM72A	9230019h11rik	DENND6A
NCLN	3110009e18rik	MAX
TGFB3	Zfp641	SLC48A1
CA2	Vil1	SC5D
ELOVL5	Tsc2	MFSD6
TTC39B	Serpina3b	MAP3K5
WDR90	Sap18b	XBP1
PSMB5	Sap18	TTLL12
ANKRD52	S100b	PDIK1L
GALNT9	Pvr	NR3C1
PHF24	Nthl1	UBE2E3
IFIT5	Naip1	CYTH1
S100A11	Mpv17l	HES2
GABRA4	Kras	GLIPR1
C4orf33	Kpna7	MYLIP
MAN1C1	Klk1b8	CRYBB1
PRAME	Hdac7	CXCL5
KCNQ3	Gm4925	NR4A3
ACVR1C	D130040h23rik	CAMSAP2
LZTS1	Cpa5	DEPDC1B
FLT3	Cct2	CNDP2
AHSA2P	Adipoq	ACSL3
CIT	Adi1	VAC14
FAM98A	Actg1	MYO1E
GBP2	2310057j18rik	RASSF3
FAM225A	Ttc5	VDAC1
PLIN3	Taok3	FES
PFDN6	Rhot2	NLRP3
CLSTN3	Rbbp7	METTL9
FAM91A1	Ppp1r21	SP3
TBX2	Ncoa5	ALG3
RAB39A	Mnt	CSTB
AGRN	Mars	PDCD6IP
GIMAP2	Gm13286	STIL
ERO1B	Gm13283	EEPD1
SLC9A6	Gm13271	METRNL
BMP8B	Fam227b	OGT
KIF21A	Entpd3	SLC36A1
DIRAS1	Dtwd1	CAPG
SELENOI	Zfp706	SPRY4
DPP4	Xkr8	UCHL3
MYO7B	Wdr59	TMC8
PDLIM4	Lix1	PDE12
ARPC1A	Ifi208	MBLAC2
KLF11	Fbxl22	MITF
APOBEC3D	Echdc3	NRBP1
SYN3	Cdkn2aipnl	RNF145
PRXL2B	Zscan25	CDCA2
USP46	Ywhah	ALDH2
PNPLA3	Tigd2	ACVR2A
SLC4A4	Smpdl3a	TNIP1
SFI1	Myl2	DAAM1
ARFIP2	Mrpl11	CENPE
FIG4	Galnt3	ARHGAP15
RNA45SN3	Fdxacb1	UBE2W
ENTPD6	Efhd1	NFATC2
SEMA4C	Ccm2	TLR4
SPARC	Ankrd9	PTK2B
KLHDC10	Ank	TMEM140
NCAPG	Alg9	CALHM2
CCDC170	1110032a03rik	CSNK1G3
DANCR	Zfand2a	ZCCHC2
PPP2R5D	Wdr36	CACUL1
MAMDC4	Rnf151	SAMD8
LINC01145	Poc5	SAMHD1
SNHG16	Ifnab	SLC25A28
TCAF1	Ifna2	CITED2
ACKR3	Hmces	MBNL1
RNA45SN2	Dip2c	TDRD7
ZNF366	Dennd1c	LDLRAD4
KIFBP	Dars	GHITM
MGP	Bola1	ME2
RAD54L	Zfp503	ATP1A3
PDIA6	Usp34	SLC33A1
ATP5F1B	Thap7	GCLC
ZBTB7C	Scd4	NUP50
PRC1	Retsat	DENND6B
KCNMA1	Ppp1cb	RAB18
FANCA	Pitpnb	BMP2
PEA15	Olfr211	MOB3A
FAM225B	Ogfrl1	SND1
ZNF331	Med18	NBEAL2
LOC101928143	Hspa1b	RPS6KC1
JPH1	Fat3	ARMCX3
GIMAP8	Fam83f	ARCN1
PARP15	Elmod3	HSD17B4
GOLGA8H	Dlgap4	DOCK2
FADS3	Cdyl	LMNA
RERE	Akr1b7	FNDC3A
EHMT1	Ublcp1	N4BP1
LINC00869	Slf2	PRCP
RUNX3	Samd4	ZWINT
PTDSS2	Prdx2	AREL1
ITGA3	Nrf1	S100A4
BTN3A2	Nr4a1	DOCK9
MED28	Kansl2	PCMT1
AZU1	Itga1	TMTC3
PDIA3	Cacna1f	CNOT6
SYTL3	Bst1	AGAP3
RAB6B	8030462n17rik	EGR1
GOLGA8T	Zbtb4	CCL3
ATP5F1A	Crygb	KNL1
SYT7	Srp14	HESX1
SLC9A7P1	Pabpc1	TAF6
HBS1L	Dennd1b	HMGN1
ACACA	Frg2f1	HMOX2
FBLN1	Atp23	IFNGR1
BTBD7	Tdg	CROT
GPRIN1	Rfpl4	UBALD2
MAP4K4	Ints9	ABHD6
LOC102724814	Hmbox1	CHD9
RIN1	Fmc1	PLK3
JUP	1190007i07rik	SGTB
PHACTR3	Zfhx3	FAM107B
HR	Rbks	ITGB8
PLXNB1	Krt24	TK1
KLK13	Hax1	ANKRD50
AAK1	Zbed6	TRAM1
DPH2	Sppl2a	KDM4B
GARS1	Sh3kbp1	RPL8
LRATD2	Nudt13	TMEM150B
NANS	4833420g17rik	SLC37A3
PCDHB5	Tomm20	IFRD2
KLF16	E030018b13rik	CDK19
CPE	Ctdp1	TBC1D23
H3-2	Tube1	TLR6
ELFN1	Spp1	S1PR3
TTC28	Scamp2	IL6ST
HCG26	Rmi2	TMEM135
DNMT3B	Orai3	MAFG
TP53INP2	Mpi	GSN
NAF1	Fam229b	EHD1
DNAJC3	Fam129b	TRIM23
RBPMS2	Azin2	SPRYD3
STX4	Usp7	EIF4EBP2
UPK3BL2	Tmod1	TIMP2
ADORA2B	Fbxl15	DESI2
AKR1B1	Cutc	SGCB
RASL11B	Cox15	PAFAH1B2
SLC36A4	Bod1l	MTMR11
AKR1C1	Zfp407	IQSEC2
COPS8	Rsph3b	TOGARAM2
IMPDH1	Snx16	LAIR1
NAPSB	Peak1	PLD2
ZC3H11B	Tjp3	MAPK13
GPATCH4	Pip5k1c	IL17RA
CCP110	Adnp2	MTFR1L
NR2F2	Onecut1	LSM2
ESYT2	Zfp790	RASA3
SERPINI1	Ucma	SRXN1
PCGF2	Pth	TNRC6B
CTIF	Btbd10	PFKL
PCDH20	Zfp52	SRC
SEMA6B	Ripor2	PRDX1
NTNG1	Ldlrad3	FAM76B
CASP10	Ggt7	MXRA7
FCGR1B	Gprc5c	FLVCR1
BMP8A	Foxo3	INPPL1
FAM72C	5430427o19rik	CAB39L
NIPAL1	1110008f13rik	SPATA18
RSPO3	Lman2l	JADE3
ARHGAP11B	Tmem42	TNFAIP3
PAPLN	Nr1d1	STAT6
ARID4B	Mob3b	ATF3
STK39	Ctbs	ACP2
KAZN	Cyb5r1	TRAF3IP3
NLRP2	Serpinb8	CD276
C2orf68	Pqlc1	TMEM37
MAP3K6	Olfr212	S100A6
PID1	Maml1	SCLT1
ASIC1	Cetn4	RYR1
NRGN	Cd209a	AMZ1
LINC02458	Bbs12	SRGAP1
FOXK1	Gsc2	FAM78A
IDH3A	Cyb5a	CASKIN2
PPT1	Cd200r4	TOB2
MLLT6	Card11	MYO1B
C21orf91	Armc2	IL12RB1
CLEC16A	Them6	EML4
PCDHB2	Slurp1	HVCN1
P2RX5	Psca	FRMD4A
BRIP1	Hspe1	FRY
ZNF704	Hspd1	BRD2
LINC00623	Fsip1	SDS
FCGR1CP	Trim36	DCAF12
RAB27A	Pi15	HAUS4
PIEZO2	Phyhd1	RCSD1
ARHGAP27P1	Fbxo33	RUFY1
TTC7A	Tmem125	ZC3H18
RASD2	Mfsd13b	KIF18B
TPX2	Layn	SDHB
DLGAP5	Cdr2	STK32C
CD58	Cdnf	ARHGEF12
FAM72B	Polk	EXOSC4
CDK1	Kmt5a	PATJ
SUMF2	Zfp386	PREX1
PDXK	Nphp1	CIRBP
CSMD3	Pom121	UHRF1BP1L
HEG1	Ube2f	CTNS
EPB41L3	Spdl1	AK1
PLK1	Setd1b	LAMA3
RIMS3	Rnase10	GAMT
TBC1D3L	Phka2	SKI
TMEM205	Nod2	MIGA1
ZSCAN30	Lyve1	ATP8B2
ADGRE2	P2rx6	POLR3B
ISOC1	Lrrc74b	LRPAP1
ACVR1B	Hpgds	IL12RB2
SAV1	Cbx8	KIF15
NAGK	2810474o19rik	ID1
ME1	Slc36a2	ARF4
PTPN11	Papola	VAMP3
ABAT	Mss51	PLD1
PPP2R3A	Klra2	CD101
SLC39A7	Cd302	CMTM3
NEK10	Ccdc134	UBA6
TAX1BP1	Tmem268	CDCA8
GANC	Timm13	BTBD8
RAB24	Tsacc	CPXM1
POU2F2	Trim7	PLXNA2
FGD5-AS1	Slc35g3	SH3PXD2B
RARG	Rapgef1	ETHE1
MAD2L1	Psat1	CYBB
NRIP3	Per2	CXCR3
NSD2	Itgb1bp2	ATP6V0A1
SMS	Il18rap	GRM4
CHI3L2	Fcf1	NUB1
CTSO	Dmxl2	MCU
CNN2	Cnih3	ACER3
EME1	Uspl1	LARP1B
RFLNB	Tm9sf4	ATG3
JAG2	Sost	CTSB
PDCD4	Rnf5	CEBPD
MARCHF3	Ramp1	JUN
KCNQ1	Prpf4b	RNF19B
NEXN	Pianp	MRPL2
USP12	Lsm1	FUCA1
ZFYVE28	Ikzf1	HSP90B1
C9orf72	Hist1h3i	CORO1A
GAREM1	Hist1h2bp	GXYLT1
ADAMTS8	Hist1h2an	AP1S3
HECA	Hist1h1b	TFPI
NLRC3	Hdgf	INPP5D
COL11A1	Fkrp	MROH6
SH3RF2	Ear4	TSKU
TMEM192	Ear14	SYT11
FOXD1	Dapl1	ATP13A2
BAIAP2	Cwf19l1	MAN2A2
TCTEX1D1	Ccr1l1	DKK2
CHPT1	Ccdc115	MLEC
ZBTB38	Bloc1s2	SH3BGRL3
TMSB10	Agpat1	SLC35B1
TRIP13	Wisp3	SLC37A4
SLC39A11	Wdr25	TLE4
NPIPB5	Wars	ERCC1
CYB5R2	Tnfaip2	IRF2BP2
TPSAB1	Tmem52b	GMFG
CCNB2	Surf2	CKS1B
ANKRD30B	Slc35a4	P2RY6
TBKBP1	Rpl7a	TGFBI
APBB1	Pak1ip1	CD99L2
CACNA2D3	Olr1	TRIM27
DOC2A	Med22	QSOX1
MCTP1	Eid3	CLN5
ADCY1	Zfp213	NUAK1
LOC145783	Usp47	SASH1
PTGFRN	Trit1	ANKRD46
SEC24A	Tmem79	SHANK1
USP6NL	St18	PNPO
ADORA1	Sod1	MAP3K14
NIPBL-DT	Smg5	GOLGA4
SPAG5	Shc1	PTPRF
CBX7	Pygo2	ANGEL2
CHML	Patl1	UBE2V2
SH3GLB2	Olfr225	NXN
SPPL2B	Nanp	RARA
MYO5C	Lamp2	ULK1
CCND3	Itpripl1	LSG1
SLFN11	Hemgn	FGD6
NACC1	Flad1	ITM2B
APOBEC3A_B	Cstl1	RENBP
TRAF1	Clasp2	PAPSS1
AMD1	Cebpzos	FKBP1A
CERT1	Cdkn2b	GNA15
UPP1	Cdk8	SDCCAG8
LOC100130238	Cd3g	ATG101
AQP3	Cd3d	FDPS
CTSH	4922502d21rik	MSANTD4
FAT1	Zfp691	RGS13
CLDN23	Zfp558	TIPARP
TROAP	Yars	GCNT1
PURB	Tspan13	KLHL6
VEGFC	Spred2	IMMT
TRIO	Slfnl1	KDM6B
DIO2	Rspo1	TCF7L2
LYZ	Proz	SRD5A3
ALPL	Pkd1l3	TMEM70
PMM2	Pax4	BTBD1
NET1	Olfr12	FAM111A
CUL4B	Ms4a3	DRAM1
WWTR1	Mrpl52	AP3D1
MTOR	Mrap2	PLXNB2
MVB12B	Mbd3l1	S1PR2
HADHB	Lpcat2b	ECE1
BTN3A3	Ksr2	CCT7
RNF123	Kctd13	BLVRB
SGO2	Kcnh5	FLI1
SLC35E2B	Kcnh2	PTGER2
CCDC162P	Gsdma	DEK
TPPP2	Gm14322	CCR1
NMNAT2	Fam46b	TBC1D9
CXCL16	Dph7	HCAR2
IDH3G	Disc1	GSDME
ENTPD4	Dhodh	BCL3
ITGAE	Defb22	EIF2S1
DICER1	Cp	SDCBP
BPI	Cfap74	LAT2
PTPN9	Cd82	EPB41
PDE3B	Btn2a2	MBNL2
GABBR2	Akr1e1	MAP2K3
C1orf21	Adcy9	GAB2
NECTIN2	Zfp459	CLPTM1
ARHGAP33	Zfp182	MTMR4
ATP6V1G1	Txn1	SPTBN1
SSX2IP	Stk4	PTPRO
ACVR1	Spaca5	ARHGAP25
PHB	Sel1l3	NAB1
TYRO3	Ppp1r18	ZBTB42
EOMES	Ndufaf7	TTC3
TANGO6	Gipc1	MILR1
HMGN3	Fam53a	PROS1
PSMB8-AS1	Cetn3	ZC3H4
MOB3C	Cebpz	RABGGTA
DECR1	Cdkn1b	PDE1B
VAT1L	Arl6ip1	UBE2C
ZDHHC9	Tmem198b	TRAFD1
EMC3	Thap4	PARP1
UQCRC2	Stx7	DCAF10
FAM32A	Pex11b	IDH1
TIMM17A	Mvb12a	PNPLA8
DNAJC9	Ldah	TPRN
C1orf226	Glmp	ATG7
TMEM132A	Fam131a	DUSP6
AHRR	Dyx1c1	CTSL
LPAR2	Dnajc14	EEF1AKMT4
LMNB1	Cstf2t	SLC35F5
BHLHE22	Cryge	NXF1
CHSY1	Crygd	DHCR24
SLC22A4	Cic	EPHX1
ULBP2	Snx14	BLOC1S6
MTMR1	Sez6l2	FAF1
TONSL	Lrmda	DAB2
RNF144A	Itga5	RHBDF1
VILL	Hspbap1	KBTBD8
ZNF804A	Dirc2	FAM219B
ANKRD13C	Asphd1	HP1BP3
NSFP1	Trim17	IKBKE
PCLAF	Sspn	SGPP1
LOC646214	Klri1	GSK3B
NKAIN1	Htra1	RAB20
GPR42	Hist3h2ba	SPOPL
CPM	Hist3h2a	PRKCD
TTC21A	Gm12260	SNX18
DCAF13	Ehhadh	RECQL5
LOC100288203	Camta2	IGLON5
CCNG2	Ttc7	PARVB
ILRUN	Tmod3	GSTO1
ZNF608	Pycard	APAF1
EDC3	Mum1	COG2
SHANK3	Herc4	TMEM241
KLHL24	Msra	SLC2A5
MAPK11	Galnt12	THEMIS2
MACO1	Tmem209	NF2
LINC01305	Ssmem1	SCARB1
PNPLA2	Sesn3	CASP4
SPARCL1	Prss56	DPYSL2
FOXRED2	Prkag2	ERLIN2
BEX3	Fbln7	KMO
RUFY4	Chrnd	KCNE3
ABCD4	Aoah	STRIP2
GABRA2	Xrra1	SSR3
NEMP2	Spcs2	DPP9
ZNF217	Spata32	HEATR5A
SLC8A1	Rsbn1	HSF1
SUN2	Hgfac	CYFIP2
SEMA6D	Magix	NAPG
DBF4B	D3ertd254e	UBE4A
PSMG3-AS1	Chst3	LETM1
POMGNT1	C2cd2	EML6
BCAP31	Gda	RHEB
CHRAC1	Ypel2	TWF1
POPDC3	Zmynd15	CAPN5
C4orf54	Zfp324	STAT1
VGLL3	2410004b18rik	ST6GAL1
FBXO9	Zfp513	CLCN7
NCAPG2	Snx17	ATPAF2
CLSTN2	Madcam1	CARD19
LOC644634	Bc005624	GAS6
VOPP1	Vmp1	SMC4
LOC100129034	Tgm1	BHLHE41
CD59	Strip1	SERPING1
TRIM44	Cbll1	SLC8B1
IARS1	Myl6b	NAA15
EMX1	Kif3a	PTP4A1
OSGIN2	Gng3	SEC22B
DLG3	Commd8	ALG14
GOLGA8K	Bscl2	GSTM3
CHRM3	Sh2d1b1	ARHGAP9
VPS26C	Lca5l	TMEM171
REC8	Cnr2	ALPK1
LRFN5	Zfp664	EFHD2
PCNX1	Gpt2	IPPK
CNR1	Ube2l3	ZCCHC24
IL1RAP	Rimbp3	PIP4K2A
KIF20A	H2-t24	HCK
CD55	Zfp362	B3GALNT1
PDSS2	Rtfdc1	DOCK8
KCP	Ptger3	PKD1
C1orf52	Larp4	RHOQ
NARS1	Abi2	UGDH
FMNL1	Slc7a5	GABPB2
NPEPPS	Osbpl1a	ABR
HS3ST1	Olfr229	SNAPIN
ACSL4	Bc048644	DDX41
BMP6	Slc25a42	NFKBIZ
MATN2	Hilpda	LENG8
STMN1	Fam71f2	BEAN1
CCR2	Msln	H6PD
LRRC3	Map3k19	STIM2
TMEM181	Inf2	TRAP1
CCL4L2	Znrf1	DDX21
LOC648987	Zfp1	TUBA1C
CKAP2L	Scel	MDH1
PJA1	Olfr923	IFFO1
WNK2	Olfr922	ARHGAP4
H2AZ2	Npas4	PGD
MICALL1	D630023f18rik	TLR3
F2RL3	Ugt1a7c	CACNA1A
SRPRA	Ugt1a6b	ATXN7L1
PDGFRL	Peli1	DNAJC19
PCBP4	Nrip1	JAK2
ZNF219	Kif2a	SHPK
PKD1P3-NPIPA1	Fkbpl	IER5L
ASF1A	Borcs6	SLC35D2
KLF5	Wbp4	NADK
CALU	Sebox	FAM214B
OGFR	Gps2	CORO7
GMPR	Gabpb1	ARSB
KIAA1841	Brms1l	LANCL1
LAMB3	Urm1	CTNNB1
NFYC-AS1	Hhat	SLC16A1
CD209	Coq5	ARMC1
BNIP3L	C1qtnf3	DOCK7
SMARCC2	Apon	ATP6V0D1
MEIOB	Apof	SEC13
ZNF395	Papd4	VPS37C
MELK	P2ry14	HDLBP
YEATS2	Mpp6	CDCA5
FAM89A	Eif4e3	ATG12
GOLGA8Q	Clec2e	ATP6V1D
MFN2	Sltm	TMBIM6
CACNA1C	Mgat4c	TALDO1
EFEMP2	Ep300	GSTM1
ADGRE4P	Cfd	HMGB1
SPATA20	Washc3	DTNBP1
ANKRD10	Vps33b	DLST
COL6A1	Tmigd1	ITGA9
HSPG2	Prkacb	ARHGEF6
PARP8	Ngrn	PNP
ADAMDEC1	Myo1h	VAV1
FAM86DP	Msx3	STXBP2
FAM131B	Hpgd	NINJ1
EPHX4	Gm1661	PA2G4
ZNF292	Utf1	FBXO22
SHISAL1	Slc36a3	ZMYND8
STRAP	Au040320	RETREG1
MBD6	Zfp652	MAF
SLC35E2A	Zfp638	VIPR1
C22orf42	Txndc16	PABPC1L
MYO6	Smim8	GSG1
TRIM55	Scn4a	KCNC3
NIPSNAP3A	Rpsa	NUCKS1
SP140	Rnf157	TOM1
RASL10A	Ppp1r12b	SMAD7
CCPG1	Ifnz	SEC11C
KIF1C	Hcfc2	KDM3A
ZNF33B	Gpr137c	ATP6V1C1
PIP4K2C	Gm13290	COLGALT1
LOC100190986	Gm13289	TNFAIP8L3
CIAPIN1	Gm13285	CNRIP1
TSLP	Gm13272	SSBP2
CLVS1	Glt8d2	PTPRJ
AARS1	Coa4	PTRHD1
DDX60L	Cgrrf1	PRR12
APOC1P1	Zfp689	GPR35
RASAL2	Sumo3	AMDHD2
KLHL30	Ripk2	CPEB2
NECTIN1	Phf21b	SREBF2
NCK2	Emc2	SMCHD1
FBLN2	Sgo2a	CASP8
LOC153684	Polr3g	KLF7
GALNT16	Pcna	DCK
ERP29	Nqo2	MDM4
MT1E	Naip7	SIL1
BMP4	Naip6	SAMSN1
CPNE1	Mthfr	CHD3
HEATR3	Kctd18	AMPD3
CTH	H2-eb2	CYB561D1
ST3GAL2	Efnb3	OSGIN1
TMEM63A	Dnah2	ARRB1
FKBP4	Zfp317	OSBPL8
TSPAN18	Trim80	HJURP
APOBEC3C	Spout1	RANBP9
PHF20L1	Slc12a7	HMMR
VTI1B	Sit1	BTBD3
C15orf39	Rdh5	COMMD10
FAM92A	Rabif	PREB
SLC43A3	Pcnp	BLNK
SMIM4	Olfr1366	AP1G1
C12orf49	Ldhb	NFATC1
MDH2	Ivd	CHST12
NIPA1	Intu	CCL1
ZNF622	Fgfr1op2	DENND2C
PABPC4	Dennd4c	WDFY2
PLCL1	Ccdc107	PHOSPHO1
LINC02185	Bloc1s1	BCAR3
SPC25	B3galt5	INPP5E
ATP5MC1	Xpnpep3	NSL1
ZBTB47	Tbcc	SELENOP
SRM	Raet1e	APPL2
ARFRP1	Raet1c	ANPEP
SLC35D1	Raet1b	SLC16A10
TRIB2	Raet1a	ELANE
TPSB2	Prox2	CDR2L
AFAP1L1	Pggt1b	UBR3
IGFLR1	Pcbp1	GDE1
TSPYL5	Mrpl39	SYNJ2
MIEF1	Hmga2	TRAPPC9
NEURL1B	Hcn3	CSAD
DYM	Gm45927	COPG1
ENO2	Dnajb7	DPY19L3
WHAMMP1	Akr1b3	COMT
TSPAN15	Tacstd2	ARPIN
ANO8	Saysd1	DEF6
CKAP2	Kmt2c	ATF6B
POLR3A	Kcnk13	ARHGAP11A
SUCLG1	Dnaja2	VPS25
MYEOV	Clspn	PIK3R1
KLHL5	Cdhr2	RFX7
TUT7	Bc052040	TGFB1
BTF3L4	Zfp580	SLC26A11
NQO1	Unc13a	HCCS
PSMB10	Tns2	MRPL19
SAMD4A	Tmem178	SFXN5
AMMECR1	Tas2r108	LIPA
LOC105375690	Stk17b	XPNPEP2
P2RX1	Setx	WEE1
KIF20B	Psmb2	DENND5A
MARK3	Pip4k2b	CEP57
MRTFB	Mmel1	CTDSP1
KIAA1522	Jak3	TTC39C
MTRF1L	Ints8	TMEM219
UBP1	Foxe3	SLC35G2
PDPK1	Ccdc106	NDUFS1
AK4	Wdr60	TRIM21
LENG8-AS1	Vpreb2	RACK1
SLITRK5	Uqcc2	RAD9B
TMEM208	Ufsp2	CFH
PRKN	Syngr3	ZC3H12A
TMEM127	Rmnd1	SCO1
BUB1	Rag2	LY6E
RPE	Rab8a	NSFL1C
DDX12P	Olfr371	TMEM214
PLCB3	Noxo1	CX3CL1
ARHGAP45	Nhlrc1	ARL6IP6
NTN1	Mogat1	CLOCK
BRD3	Klk1b11	TRIM13
MRTFA	Haus7	RELT
PPP3CB-AS1	Gphn	RASAL1
SLC7A1	Golph3l	FCER1G
MRPS10	Gngt1	LACTB2
STARD5	Rab19	KIF1B
ARMC10	Kcnj6	LRP1
HOPX	Ift27	HEXB
AGPAT4-IT1	Fam26f	TMEM167B
CREG2	Cdc37	FBXL5
RABL2B	Arl2bp	EIF5B
TTF2	Ythdf2	ATP2A2
CCN3	Fahd1	SLC5A6
NPTXR	Dhx8	SERPINB12
RTL6	Nepro	TPI1
NDRG4	Jpt1	KPNA1
NRCAM	Gmeb1	BAMBI
OGDH	Fkbp15	TFG
CLCA4-AS1	Cds2	EI24
MCOLN3	Sae1	MORF4L2
TMEM151A	Akap17b	NAPA
ITGB2-AS1	Aggf1	AJUBA
R3HDM1	Tex50	MARCO
PSME3	Tatdn2	PTGES3L
CDC42EP1	Cops4	SHKBP1
STAG3L5P-PVRIG2P-PILRB	Zbtb3	CPEB4
SF3B6	Tmem55a	TMEM245
RNF217	Polr2g	GLUL
LINC01138	Nr0b2	TMEM154
STOX2	Kctd12b	MTRR
PKD1P6-NPIPP1	Id3	CAPZB
SENP2	Chic2	ST13
EIF1AD	Camk2g	MYO5A
KLHDC8B	Vps13d	TXLNB
STX1A	Tcof1	SMAD6
CKAP4	Dync1i2	NAP1L5
ECM1	Tmem202	PRADC1
SLC25A44	Tec	LPCAT3
TUFM	Mcm6	RMND5A
NIPAL3	Atrnl1	GGCT
C8orf31	Nit2	DENND4B
SPNS1	Gm1070	STK40
TMEM51	Wdr38	CLPX
GIHCG	Spdef	OPA3
RABL2A	Slc25a26	FRG1
PAX5	Pdzd7	VAV2
HLA-H	Arpc5l	TRADD
YIF1A	Pde2a	BRWD3
CMTR1	Il6ra	APBA1
ITPK1	Rnf215	TMCC3
MST1	Pilrb2	ATG16L2
GOLGA5	Necap2	PRMT5
WARS1	Adprm	MASTL
TMEM117	1110034g24rik	POLR3H
RBP4	Ttc41	DUSP14
SARS1	Lin52	PSMD3
VDR	Aldh6a1	NUF2
KLF15	Adgrf1	HLX
KLF12	Ptpn22	MMP12
SMAGP	Pla2g15	ZGRF1
BVES	Mecp2	SKP2
CIZ1	Clec9a	TTK
GCA	Clec1b	ELOC
HNRNPUL2	Ino80	TRABD
PRKD2	Fuom	REV3L
SDHD	Fggy	NDUFS5
AIG1	Spata7	PLBD2
NLGN4Y	Slc18a1	PSME4
SLCO3A1	Chordc1	AGPAT4
KCTD8	Aldh1l1	HPS4
PLIN4	Faiml	ABHD5
TSPYL1	Cmbl	LATS2
H2AX	Cep70	NGFR
ST3GAL4	Abcb11	TYMS
BRD7	Itsn2	TAP2
CCDC14	Rnf130	OXCT1
PKD1P5-LOC105376752	Gtf3c5	PPP3R1
RADX	Gns	AGPS
KIR3DX1	Ccdc8	NECAP1
RPS2	Ccdc148	IDNK
CXCL12	Atp6v1g3	SNX6
C1orf216	Synpo2l	CORO6
CLDN7	Sec24c	TNFAIP8
KITLG	Rpgrip1	SLC41A2
CAPN2	Hnrnpc	EVI5
OTULINL	1700066m21rik	DNAJC18
RNMT	Prss40	TLE1
PARPBP	Krt75	IGBP1
DBP	3830406c13rik	PNISR
SLC4A1AP	Dock5	FHOD1
DMAC2	Aicda	SLC31A1
MIR4477B	Nrg2	PSIP1
AFG3L2	Dstn	KIF23
PRF1	Tmem211	TNK2
KLHL8	Spin1	GPR137
OTOGL	Soat1	LRRC25
LOC154761	Plekha7	PXN
FAM222A	Bc005561	IPO13
CARS2	Zfp799	DDX10
KCNJ1	Syt8	BICRAL
SMG1P6	Efcab2	ERRFI1
ABL2	Syne2	RB1CC1
BLZF1	Sphk2	ADCK1
ISOC2	Spaca4	DZIP3
GTF2IP20	Naaa	MSH5
PTPN3	H2-t9	TCEA1
APOOL	H2-t22	SERINC1
ODC1	Gnb3	SPTBN4
MED14	Gm6034	FNBP1
SLC9A7	Fam83e	MRFAP1
CD1C	Fap	DTYMK
TKTL1	4930502e18rik	OPHN1
ERP44	Zfp472	DUSP7
NDUFV1	Tmem29	TMTC2
ZNF664	Serpinb1b	NDUFS3
CXCR5	Fn3krp	TNPO2
C1RL	Fn3k	ENC1
TENT4B	Gfer	GPR176
GNA11	Gdf1	TACC3
HIVEP2	Dyrk3	CDKN1C
KIF14	Commd2	CRYBG1
H2BC12	Cdh1	CXCL9
ERCC4	Cd46	PNKP
TNFRSF10D	B230118h07rik	MAPK8IP3
CHST14	Armt1	PPCDC
HMGCR	1700029j07rik	AP5B1
STAU2	Ttll9	MYO1C
TMTC4	Ralgapa2	BIRC5
ATP1A1-AS1	Otos	ANXA6
RPUSD3	Lrriq3	CNOT1
KCNJ2	Ikbkg	PSMC1
APOO	Gpaa1	DUSP23
DDIT3	G6pdx	CCNL1
IER2	Fpgt	NDUFS2
PCDHB10	Btrc	RAB17
NASP	Atg16l1	IRGQ
KCNN2	Abca8a	CPPED1
SMIM25	2810403a07rik	GADD45A
KDM5D	Zglp1	CAD
TOMM40	Zfp433	GALNS
CD163L1	Trex1	ANAPC16
MIR503HG	Top1mt	SLC35A5
SULT1C2	Tbccd1	NFIC
CACNB4	Snx15	MRPS23
FBXL6	Snrnp48	GRSF1
MUC20	Slc52a3	CREB3L4
HENMT1	Slc34a3	RILPL2
MYOM1	Slc2a1	PLD3
BBOX1	Slc15a5	WDR7
FERMT2	Sac3d1	NMT1
SLC49A3	Rnf224	PSMA6
CYLD	Mrpl30	TANC2
AMT	Mitd1	SLC25A10
CYB561	Hnrnpr	FAH
STAM	Hist1h1t	MED13L
RECQL4	Gpn3	SLC6A16
CAPN3	Gabarap	MAP4K3
SPNS3	Fdx1l	WASHC1
MIDEAS	Fam83a	RHOV
COL7A1	Fam216a	HFE
PPME1	Fam166a	GFPT1
TNFRSF12A	Elp5	GGH
LYPLA2	Ctcf	IGFBP6
STIP1	Cd74	BRI3BP
LOC101928489	Afg1l	HSPA1L
B3GALNT2	2410002f23rik	PGK1
SUGP2	Zfp984	CPEB3
ADSS2	Trappc10	GSE1
PLEKHJ1	Tmem129	PSMC4
RSKR	Tigd5	SPATS2
ADAM28	Slc25a38	EIF2A
SLC25A46	Scd2	ERMAP
VPS41	Rrp9	CDK14
PDCD6IPP2	Prss46	PPIP5K2
RSL1D1	Prss45	YIF1B
WASH8P	Parp3	SEC22C
SLC1A5	Nyap1	GNA13
TRAK2	Mgst2	APBB3
ZNF311	Lrp6	ACTR1A
MAP1A	Ip6k3	GPR65
TRIM38	Il27	TMEM141
PLXDC2	Gprc5d	CFP
KIAA0930	Fgfr1op	VCP
C2orf92	Eef1d	ARHGAP18
DHFR	Cln3	RNASEH2A
TENT5C	Apobr	TIMM50
CCDC18	Apbb2	PLIN2
HMCN1	Zfp623	RRBP1
NRBP2	Zfp207	ITGA4
LINC00106	Spsb4	SPCS3
LOC101928429	Sike1	OGG1
BARD1	Rab43	EIF3K
ARFGEF3	Prokr1	PNPLA7
ACAD8	Plscr2	IQSEC1
PPP2R3B	Mzt2	PAK1
C2orf91	Jaml	KYAT1
MED21	Ifna7	ASCC1
SLFN12	Ibtk	SSB
TNFRSF9	Gm13288	RRP12
NUP188	Gm13287	AURKB
HIGD1A	Gm13279	ITGB1
DCAF5	Gm13278	IDUA
CRHR2	Gm13275	MANF
SEPTIN6	Dusp11	SRRM2
ATG4D	Drg2	CARF
DAGLA	Cdca7l	PSMC3
SLFN13	Akap7	FEM1B
RYK	5730455p16rik	MRPL36
HCG20	Zfp930	NCF4
ASAP2	Tst	HOOK2
SBF2-AS1	Syf2	EZR
NPTX2	Slc23a2	MAPRE3
SIVA1	Prepl	GLG1
RDH11	Plpp5	GDI1
MEPE	Pgpep1	TLR1
NOC2L	Pcmtd1	PLEKHO1
PRDM4	Pcm1	CDC6
RAP1GDS1	Mpst	NDUFS8
IRF1-AS1	Manbal	RHOF
CBWD3	Klri2	XK
ADGRL3	Hid1	FOXL2
GOLGA8B	Fancc	PGAP1
GNB5	Cox4i2	PLXNB3
GOLGA8A	Cnnm3	SDHC
FAM122C	Cgref1	GLRX3
CCDC85A	Cfap126	CSF2RB
RESF1	Abhd1	GTF2A1
CDHR1	Spink13	TBC1D4
ATP5MC3	Rpl3l	CYB5R3
TCAF2	Prss30	HAL
IRS2	Pom121l2	ARL8B
ELOVL4	Npb	TMEM175
SMAD2	Kdm6a	PCYOX1L
GNAI2	Gm13277	ADAM8
CLSTN1	Gm13276	ST6GALNAC4
AMOT	Bpifb9a	PCDH7
UQCRFS1	Anapc11	PKIB
LOC105370401	2310022a10rik	ARL1
PPP3CA	U2surp	FAM219A
PRKAR1B-AS1	Tspan10	FEM1A
RAD23B	Tmem242	ADAM19
EMID1	Tmem138	FCHSD2
CLCN5	Sufu	XCR1
ATP10D	Pik3c3	OTUD7B
C21orf58	Nploc4	NSA2
CYP7B1	Mthfd1l	GSPT1
GNLY	Fbxw7	TIAM1
SHE	Ear10	TGFBR2
USP51	Cyth3	CLEC7A
GABPB1-IT1	Aw549877	CCDC80
TUBGCP6	Zfp90	RBM15B
LTB4R	Rnaseh1	SLC11A2
GIT1	Fabp1	DAZAP2
MLC1	Tsc22d3	IMP4
NPIPB3	Psmg2	UAP1
CD9	H2-t10	LTC4S
GBP1P1	H2-t-ps	MAPRE2
PBX2	Gm7030	SPCS1
LCNL1	Cep76	ALYREF
BICD1	Ric8a	CENPA
UNG	Otoa	PEPD
HMGA2-AS1	Odf3	PIK3CG
TMEM44	Igsf6	MANEA
PPP1R14C	Sh2d5	COMMD9
HSF4	Polr2d	NUDT1
DSTYK	Myc	B3GNTL1
SNORA104	Kif17	ZMAT3
ATPAF1	Cdt1	PIGZ
NUSAP1	Aprt	RXRA
ABRACL	Zfp146	NFKB1
RAB3D	Ifna13	IRF9
TMEM217	Gm5113	PSD
HBP1	C87499	CSPG4
TNFRSF10B	Arhgap22	ANXA4
CSF3R	Tmem239	NFKBID
NUS1	Plpp3	ISCA1
YPEL1	Olfr806	MMP15
ABCD3	Olfr1274-ps	DCBLD2
NPIPB11	Napepld	ANKRD33B
ASB16-AS1	Lyplal1	MND1
TRIM9	Dpp3	PLD4
ZNF365	Col6a6	KHDRBS1
PRMT9	2210407c18rik	BROX
KIF4A	1700020a23rik	TRAPPC12
FOSL2	Phyh	PSMD4
ODR4	D17wsu92e	ABCB4
RTN1	Gbp11	NSMAF
KPNA5	Fbxo48	INSIG1
HSP90AB1	Armc7	MIS18BP1
ZMPSTE24	Zfp457	PLXNA3
KCTD15	Vma21	FHL3
SENP7	Ptpn1	HIPK2
SIGLEC5	Poc1b	ENTPD7
CYC1	Mrps30	TMF1
APOLD1	Gm5878	ABCE1
MYL10	Celf6	EXOSC5
COQ9	Ccdc88c	TNFAIP8L1
COG6	Ankrd35	VPS51
TCF19	Tsnaxip1	LTB4R2
BISPR	Nelfa	MAN1A2
RFX5	Gm1966	TANC1
CECR2	3110002h16rik	DUSP4
CHCHD10	Zfp592	ZHX1
PTMA	Usp3	ELMOD2
PNMA1	Tnfsf15	C2CD2L
HSD17B11	Agmat	GINS4
SCAMP1-AS1	A730008h23rik	GTF3C6
ENDOD1	Prlhr	GTPBP4
BSG	Polr1d	SSU72
IPO7	Pde4a	SORBS3
DPM2	Nae1	ASF1B
TBC1D20	Mtss1	CD83
KCNMB1	Lnx2	VASP
CLGN	Car7	GNPDA1
UQCC1	Sgta	PPP1R15A
PLPPR2	Rrm2b	COA7
OLFM3	Rpl37a	SPEG
ETV3L	Rab33a	MICALL2
SUPT20H	Ppp2r5c	KMT2E
ROR1-AS1	Nadsyn1	LSM14B
SYT17	Dhcr7	TCN2
BOD1	Zfp825	HAGH
KPNA4	Trappc6a	ZNRF3
FAM122B	Slc25a17	PITPNA
PGAP4	Olfr172	CRTAP
ILF3-DT	Bloc1s3	GABRR2
SNAP47	Cnot4	SUCNR1
UQCRC1	Ren2	GOLGA3
RNF40	Ren1	MAK16
RDX	Mmaa	TPD52L2
STAMBP	Htra4	UBE2M
ARHGEF40	Hexa	POGZ
BRD8	Evx1	MCM4
TMEM243	Cox7a1	EPHA1
FARSB	Add1	SH3BGRL2
PKD1P1	Zfp839	LRRC59
NUDT4	Ugt1a6a	TMEM199
RPAP2	Slc15a4	SBDS
C12orf73	Rtl8c	ZFP36
OSBP2	Rnf139	TFPI2
MEI1	Mok	INTS6L
PEX19	Fbxo7	GGA2
MTARC2	Fam46a	GGA1
GPRIN3	Nup205	TAF4
TMEM253	Fscn3	ADM
PHF1	Arf5	NUMA1
GABRG2	Gpr141	GBA
GJC1	44628	FGD4
TMEM38B	Lilr4b	NOLC1
PKN3	Soga1	ADD3
ADO	Msh4	LRP11
MS4A6A	Kctd9	FZD5
QRICH1	Ppp2ca	SLC39A2
GGT3P	Inpp5a	COPS2
RAPH1	Rab11a	GOPC
TBC1D8	Fam50b	GLYCTK
STX1B	A130010j15rik	B4GALT5
GUF1	1110051m20rik	ANXA11
MCPH1-AS1	Xkr9	SERTAD2
TMEM250	Rubcnl	FBXO5
MYDGF	Ms4a4d	SLC38A6
ONECUT2	Mob4	DDX19A
ATP11C	Mgea5	PPIH
YWHAG	Marveld1	HAUS3
BAZ1A	Map2k6	EEA1
RAC2	Cyb561a3	IL27RA
EMP3	Ccdc38	TIFA
KIAA1191	Bptf	CCDC88A
MAPK12	Amdhd1	GABARAPL1
PCMTD2	Adck2	ASXL1
PHKB	Zfp33b	CUL3
GPR3	Zbtb40	ILK
C18orf25	Vmo1	PDLIM2
DDX3Y	Ttpal	RASGRP3
ARHGAP27P1-BPTFP1-KPNA2P3	Sptssa	MCM2
CTSW	Spib	RPL17
EXOSC9	Snx1	MTIF2
WDR45	Snap23	TTC21B
ALOX15	Selenbp2	CCDC57
LINC02256	Saa4	PGRMC2
FKBP9P1	Saa1	MYL12A
MIR5047	Mybpc2	YME1L1
NLRC5	Kmt5b	SELL
AK6	Itpr2	CCNH
EIF3I	Hsd11b2	ELK3
FGD1	Gltpd2	DGKD
MIR4435-2HG	Fxyd7	LPCAT1
CENPI	Fbxl4	NUAK2
HEMK1	Fam96a	EVA1B
PANK3	Dram2	PSMB6
SAP25	Asnsd1	ARRDC2
ARFGEF2	Asdurf	GUSB
PIMREG	Actl9	POLDIP2
RDH13	Zfp692	TSPAN33
GOLGA2	Ten1	BCOR
MYO19	Stxbp4	IL10RB
EMILIN3	Slc17a9	PGM3
SLC51B	Nudt3	PPP1R3B
ELMOD1	Ipo4	AIFM1
ANKEF1	Fam166b	USP4
LINC00964	Cox11	PNRC1
KLHL36	Alg12	ELOF1
VAMP7	Acox1	LMNB2
SMC2	Aw554918	ITPKB
NEK2	2610044o15rik8	HTR2B
EPS15L1	Zfp947	SFMBT2
FCGR2A	Tm4sf20	MRPS22
LOC100507412	Tln1	SEC62
ALDH3A2	Terf1	CHD1
TCTN2	Taf7	CDKN1A
SLC25A32	Slc6a19os	NDC80
TMEM86B	Slc6a19	SLC16A3
IQCB1	Slc25a2	EMB
PIK3R2	Rnf223	PTTG1
DDB1	Popdc2	CCDC91
HCG4	Pelp1	LIMD2
NMUR1	Pafah2	CYB5R4
FAM20B	Nme6	TIMM44
SUMO2	Nbr1	IVNS1ABP
KIF18A	Mtch2	ELF1
LINC01061	Ly6g	CRELD2
GPC4	Lrp5	HNRNPUL1
LILRA1	Krt8	NRROS
SLC49A4	Josd2	FYCO1
PAK5	Il17rd	STAT4
SZRD1	Hykk	KPNA3
C18orf54	Hoxa2	PALD1
HLA-G	Gm14440	CD300LF
TICRR	Gm14296	GALNT11
C1QTNF6	Gm14288	IL18
GLB1L	Fyb2	MDFIC
GLIPR2	Fam92b	MEF2A
HCAR3	Fam151b	SLC7A7
USP42	Ebf3	GTPBP1
PMFBP1	Dpep1	CHSY3
SLC9A3-AS1	Cyyr1	IK
GNPTAB	Creb3	KPNB1
ANGEL1	Cnn1	DIDO1
LINC00963	Cdc42ep2	QTRT2
CPEB1	Cd5	NDUFB9
DLX4	Ccl6	NDST2
PIP4P2	Aspdh	BMS1
MTX1	Arl14ep	MPV17L2
GADL1	Arl10	PAQR7
HSPB11	Angptl7	VDAC2
NFE2	Adamts4	ERMP1
CIAO2B	Ablim1	PPM1M
FAN1	A830010m20rik	HCST
ZBTB33	4930430f08rik	RIPK3
CCDC188	1700017n19rik	MICAL2
PRKAR2B	Zfp91	USP36
CARD10	Zfp383	POC1A
EIF5A2	Zfp27	PSMD6
NDUFAF4	Wdhd1	ISCU
UIMC1	Timm22	FTO
CD99	Socs4	ALOX5AP
COL9A2	Rragc	ZMAT1
FLT1	Pigx	TAF13
GRIK2	Nudt5	BNIP3
LOC729218	Ndufa4	RAD51
LIMS2	Nbeal1	RRP1
TMTC1	Lpxn	GPAT4
PGA3	Ipp	TRAF3
KDM7A-DT	Glt8d1	SLC25A11
FUT8	Dgkh	B3GNT2
C12orf57	Dgat1	NEDD4
TGOLN2	Cdc123	DRAP1
UNC13C	Atp13a1	MPZL1
POLR3GL	Agtpbp1	RNF121
BPNT1	Aa467197	ELOA
HINT3	Zmynd10	SIDT2
MAP4K5	Zfx	TCTE3
COX10	Vpreb1	ATF6
CD27-AS1	Usp2	CLK2
ARHGEF17	Txndc9	NAA25
CDH2	Top3b	DACT3
RAD9A	Tab1	TBRG4
VEZF1	Rex1bd	TFEC
EPC2	Ppm1l	GIPC3
FAM136A	Pllp	ATXN2L
P4HA2	Pigs	GALT
BBS1	Nudcd3	EOGT
SBF1	Nprl2	SLC22A16
ESRRA	Myo9b	PSMC2
SLC25A24	Mgat4b	ATP6V0A2
DPYSL3	Kdm5a	MYADM
LINC00460	Igll1	AP1G2
PLXND1	Neurl1a	EPB41L2
ZNF789	Snrpc	FAM49B
TRPC5OS	Il20	PACSIN2
CD22	Cks1brt	ADAR
PAQR3	Nars	PPTC7
PTGR1	Ccdc169	SLC12A5
HAS3	Pf4	RACGAP1
PSMD7	C1qc	ARHGDIB
PSMD2	C1qb	NSDHL
GCHFR	Akr7a5	ALDOA
DAPK2	Tifab	PRDM1
LINC00685	C1qa	DTX2
DUBR	Arrb2	MIDN
NFAM1	Ly86	PTPN12
CNTN4	Csf1r	MINK1
KLHL28	Adad1	MS4A7
LMF2	2300009a05rik	PPP1R7
COPE	Dnajc13	MTMR6
FAM184B	Nme4	PRRC1
TPRG1	Lmbrd1	HSPA9
CRISPLD2	Dnpep	SPI1
SLC35E4	Catsperg1	LUC7L
LYSMD3	Bahcc1	OCRL
DNAJB9	4932438a13rik	FOS
ESYT3	Zfp385a	TM2D2
NXT2	Gng7	ETV5
SEC23IP	Trmt61a	ACTR8
METTL2A	Pik3c2a	SLC25A15
LOC653513	Zfp729a	CALM3
ZMIZ1	Zbtb25	LEO1
FAM193B	Zbtb1	GBGT1
STX2	Trp53rka	ZW10
PES1	Rps21	NMB
NME3	Nek9	CPD
IMPA2	Bc049762	HMOX1
PRG2	Prn	LMO2
PGA4	Mrm2	UCHL5
SLC7A2	Diaph2	PRDM8
LIME1	Clec4g	GDPD5
ETNK2	Tmem27	PALLD
TMUB2	Tmem204	P2RY12
WWC2	Jakmip1	PLOD1
ADAMTS13	Secisbp2l	KLF2
ERVK13-1	Rnft1	GATM
RBM38	Pym1	ARHGEF39
ARMH1	Npl	UBAP1
PCK2	Enpp1	DNAH6
BAP1	Dynlt1f	NR1D2
CNTNAP3B	Dynlt1c	TNFRSF1B
HPSE	44811	BRCA1
PEX6	Rnf167	NDFIP2
TIGAR	Nek4	OPLAH
DLAT	Itih1	CENPO
MAPKBP1	Il1a	FOXP1
MED24	Hist1h3c	OPA1
CTNNA2	Hist1h3b	COX20
MRGBP	Hist1h2bb	TSG101
TAF9	Hist1h2ab	FAM214A
RASA4CP	Hist1h1c	ETV6
SLIT2	Grb10	NDUFA6
RECK	Gbp9	DCUN1D3
LOC441155	Eno3	MIER1
RPUSD1	Chst7	OSBPL11
HNRNPLL	Akap6	RAB32
STAG3L2	1700022i11rik	LTV1
RUFY2	Slc16a14	TMBIM4
PDIA3P1	Kif13b	ADGRL2
NR4A2	Zfp827	MAD1L1
MXD3	Xntrpc	RIC1
SETD2	Xndc1	TRAF6
NFATC3	Wdr78	SETDB1
MGC12916	Washc5	MIA2
ATXN7	Ramp2	DYNC1H1
NETO2	Mthfd2	SPATA2
CTSV	Mob1a	CKS2
ZDHHC12	Cwh43	ATP6AP2
LOC100289656	Capsl	TNFAIP6
PITX1	Capn8	TPD52
PXYLP1	Rbm26	NCKAP1L
TRMT6	Musk	CUBN
CHMP2B	Ints12	CUEDC1
FANCG	Gstcd	USO1
CIP2A	Zbtb8os	MAP3K8
KCNJ15	Rbbp4	PDE7A
ULBP3	Prrt2	TMCC2
NEK8	Pagr1a	TRERF1
DERL1	Mvp	KMT2A
NPAS1	Maz	RNF128
LOC105378047	Lyrm7	NFYB
ATP2A3	Kcna3	TRIM69
PI4K2B	Efcab5	AFF1
DCUN1D5	Csgalnact2	UTRN
PUM2	Copb2	MAP3K12
PTGER4	B2m	ACSS2
PNO1	Acss1	PMP22
H2BP2	Zzz3	LETMD1
TOM1L2	Slc2a6	PPP4R1
DUSP5	44627	RAB31
CLPB	Uggt1	PHYKPL
CRADD	Treml4	UROD
GIGYF1	Cog7	AP2B1
TMEM161B	Agpat3	FAM227A
CPTP	Tmem164	INTS6
GTF3C1	Tal2	CRYZ
EXOC3	Rps5	HDAC1
CPQ	Rnf225	BAG4
HDAC4	9430015g10rik	CLASP1
RIF1	Zfp341	CBLB
LRRC4B	Ube2v1	AKT1S1
AATK	Serpinb6b	SMARCD2
RNASE7	Otor	SPOP
CCDC149	Morc2a	SCAF8
BCLAF3	Mocs3	SLC30A1
PNPLA1	Med26	BBS10
SLC27A4	Junb	TMEM131
MRPL10	Inpp5k	LAMP1
FBXL17	Gss	ANKRD45
EFTUD2	Dpm1	MROH1
WWC3	Ai314180	RHOH
LEPR	Zfp622	PREP
INO80E	Zfp456	DCHS1
MAP1LC3B	Klra10	NECTIN4
PGAM4	Kif7	GTF2F2
BCAT1	Il9	SLC39A14
RSRC1	Fam58b	SDC4
WASH5P	D830031n03rik	KLF10
PTGFR	Clec4n	LPAR5
CHCHD3	Arpc3	E2F8
MRPS7	Anxa13	NEIL1
ITPA	Af366264	ST6GALNAC6
GALNT7	Smg9	CNNM4
FRG1HP	Klrb1c	PPP1R15B
IDE	Gtf2e2	KCNAB2
RAB11FIP1	Rai1	REEP5
LOC642846	Pnp2	CLUH
ISG20L2	Hist1h4i	BICDL1
TIMP4	Hist1h2bj	DPAGT1
LCOR	Hist1h2ag	SNTB2
MTCP1	Haus8	KANSL1L
CITED4	Dcps	CAPZA2
TMEM120B	D2hgdh	RBSN
TRABD2A	Ccdc77	ELOB
MAML3	Cavin1	ORAI2
CDKL1	Anapc10	SLC44A1
CHP1	Aldoc	RANBP6
ISLR	Zfp770	RPL4
SLC24A1	Utp20	TRIM8
MTCL1	Trhr2	TMED1
NTAN1	St7l	MMS19
TMC7	Slc30a4	ADAT3
FUNDC2	Rab2a	HIF1AN
SAT1	Ncbp3	ASPH
NUP160	Map4k1	RBMS1
AFAP1	Lim2	NSMCE2
SPTAN1	Frat2	TUBG1
FASTKD5	Eef1akmt4-ece2	QRSL1
PNPLA6	Dus4l	METTL1
NINJ2-AS1	Cog5	CARHSP1
GPC3	Cd2	CCDC97
CACHD1	Ccdc90b	GPR174
MRTO4	Capza1	PLEKHB2
ZNF670	Arid1a	NINJ2
WASH7P	Ank1	HELB
TTC13	Aar2	RRP1B
SDHA	1700122o11rik	STAG1
KRT79	Trappc5	DCP1A
NUDT21	Tmub1	NOP9
DLX3	Sprtn	COX14
FDX1	Slc18b1	SNX2
LOC100310756	Sem1	CTSD
FOXP4	Rps12	MAP7D1
RGS12	Rnaseh2b	NHLRC3
ARFGAP3	Ptprv	ABHD12
UBXN6	Psma1	USP5
HERC2P2	Prss33	ADIPOR2
ATP8B1	Ppp2r1b	DENR
YAP1	P2ry10b	CALML4
NIPSNAP3B	Nipa2	OSBPL9
RMC1	Mad2l1bp	VSIG4
STC2	Gm12250	AIP
PTOV1-AS2	Fcor	TXNRD2
SRR	Fastk	ANGPTL6
C20orf96	Exoc8	KAT2A
RORB	Erich4	RPS6KA2
NCR3LG1	Eef1akmt2	MYBPH
PLA2G4C	Abraxas2	CHPF2
CHMP7	Zkscan1	CDC42SE2
C1orf115	Zfp446	ENDOG
CACNA2D1	Wnt5b	AHCYL2
CDK10	Tekt2	RHOD
TMEM147	Slc25a39	SPR
BAG2	Pign	MRNIP
AR	Olfr520	PLEKHA2
ATP5MPL	Mtap	NOC3L
CASC4	Mt2	SLC39A8
LINC01410	Mt1	NEURL3
GLUD2	Mia3	MSRB1
VAV3-AS1	Insig2	MALT1
RHOBTB3	Ifit1bl2	RPS19BP1
GUCY1A2	Hibch	RASSF8
PROM2	Gsto2	FILIP1L
C11orf24	Gpcpd1	ITGB3BP
GEN1	Gm38396	CENPU
LOC730101	F7	CLDN15
H2BS1	Dkc1	LPAR3
FOXN2	Commd7	MCM3
ACBD4	Cep128	GNA12
FABP3	Arhgap10	ZMAT2
LOC730268	Alkbh3	MAD2L2
LCLAT1	Adprhl2	GPD1
KLHL21	2310035c23rik	DSE
TRIM26	Zfp747	CCND1
ATP5F1C	Tmem100	IL33
ICA1	Tmc3	GTF3C4
MFHAS1	Rnase12	PSMB8
KRBOX4	Rell2	ARSG
LNPK	Phf12	ASAP1
UBE2E4P	Olfr750	ATP2C1
ZNF721	Nmd3	DNMBP
OAT	Nicn1	ECHS1
MIOS	Khk	CD53
PI4KA	Iba57	MYO1D
STK35	Fopnl	AQP9
PRELID2	Emilin1	TGIF1
TIMMDC1	Ccdc174	DNER
YARS1	Ccdc15	MICU1
TAFA3	Atxn7l2	UBE2T
DNAJB2	Atad2	NUDT9
KCNA2	Adgre5	STARD3NL
RN7SL2	1700023f06rik	PEX13
TTLL4	Thap3	PITPNC1
PRICKLE2	Sfr1	WIPI1
LINC01814	Rpl31	CSRNP2
RHOU	Raet1d	RNH1
ZNF514	Pstk	SMIM20
SNRPG	Pitx3	TPT1
MATK	Phf13	FABP5
SYVN1	Pfdn5	GPAM
GAS5	Naa50	MAN2B1
ITPRIP	Myg1	RGS10
MYOZ2	Ltbp4	SFT2D1
H3-3B	Gpr15	FAM205C
WDR31	Gbf1	TUBA1A
LOC100507477	Cyp4v3	GALNT4
LOC100129083	Casc3	FAM50A
PKNOX2	Cadm1	STRN4
MIIP	Bloc1s4	SCFD2
EZH2	2310057m21rik	FAM83G
KHNYN	Zfp653	RHOG
EIF2AK3	Supt3	NFKBIE
AP5M1	Smarcd1	SH3GLB1
BSN	Hspb9	WDR18
ERAP2	Ube2n	NR1H2
ARRDC1	Mrpl42	JAZF1
GATD1	Tmem176a	VPS18
GATB	Palb2	RAD51AP1
AMOTL2	Snrpa	RABEPK
TLE5	Bc024978	DNA2
CARD8	Prrc2a	ATAD5
AIFM2	Stk24	COX6A1
KPTN	Smim24	DGKA
USP32P2	4930444g20rik	PFN1
PDK4	Slc15a3	LRRCC1
GTF2IRD2	Tlr9	ADRM1
NOXA1	Zscan29	FAM110B
STAG3L3	Ccl24	XPO7
HECTD1	F830045p16rik	SCAMP3
STARD9	Poln	TCTN1
ANXA2P1	Pdia4	TBC1D22A
PRSS23	1700008o03rik	DDX11
ZBTB12	Lrrn4	EIF2B4
FNBP1L	Olfr368	ESCO1
YTHDF3	Dok2	ARHGAP21
MTRNR2L8	2610507b11rik	CLK4
FAM234B	Tbk1	FKBP7
ZC3H15	Itgam	RAB3GAP2
ETV4	Ifi204	COMMD4
MAN2B2	Dok1	ARPC5
SLC38A1	E230025n22rik	SESN1
ATP5MG	Lcmt1	LRPPRC
SH3BP5L	Tcerg1l	LOXL3
PHACTR1	Eid1	UBR4
GAPT	Slc22a29	PELO
NPR2	Rnf180	TUBB2A
MAST2	Rnf135	MORC3
WHRN	Tmem250-ps	NKIRAS1
THTPA	Tmem179	COX7A2
LRRC10B	Slc38a7	DUSP18
GGTLC2	4932438h23rik	SMARCA4
OTOF	Zfat	GAK
ATL1	Ufl1	TBCD
GLCE	Pex7	SMARCA2
NPIPB12	Itgav	USP16
DHX40	Dmxl1	SETBP1
RMDN2	Cabyr	PER1
LOC102723360	Fez2	EMC7
ZNF778	Gm44805	TOR3A
RBM18	Apoc4	MAP2K5
ACADS	Apoc2	RUSC1
DHRSX	Ftl1	VWA5A
PARP4	5031439g07rik	RRAGA
MLF1	Dclre1c	MDFI
AKR1C2	Gbp7	RAB40C
CHST15	Zbed4	RBBP6
FBXO43	Snx8	TRIM45
DCLRE1B	Sh3gl1	MAP3K1
PLEKHO2	Chaf1a	PRKCE
PJA2	Pofut2	TXNDC17
RARS1	Cep295nl	SARAF
PDE8B	Scrt2	CWC27
SMPD1	2610524h06rik	DUS1L
RPL7	Ai661453	AHI1
PPP2R2D	1700001c19rik	PPM1D
SEC61A1	Dscr3	HMG20A
RFNG	Nop2	LRIF1
NFS1	Gramd1b	CD164
CACNB3	Rnase4	LAPTM4A
RIMS1	Ang	KIF5B
UBXN8	Morn4	CISD3
CD1D	Tet3	ADGRG6
MIR210HG	Lrrk1	ATF4
FZD3	Plekhh3	KCNIP3
HABP4	Cntnap1	E4F1
STX6	Ccr10	PDCL
FMR1	Rbfa	OAZ2
C8orf33	Clec4d	DDX55
WASH2P	Arap1	PIK3R5
LINC00243	Adgre1	RCC2
PLAAT4	Samm50	RTL8B
SPSB1	Nfu1	NAA20
LOC100288637	Cfap45	SSC4D
HNRNPA0	Fcgr1	PTTG1IP
MRPS12	Gdf3	NDC1
PAXX	Apobec1	EP400
MS4A14	Etv3	LIMA1
B3GAT3	Ccdc122	PNN
SNORD48	Slc17a5	FAS
CBLN3	Sypl2	GNG5
PCDHB9	Gpr146	HYI
GASK1B	Akt2	SURF4
RPF2	3110043o21rik	GAS2L3
NFKB2	Pisd	CRK
TSC22D2	Ap2m1	TTC8
HMGXB3	Gstm4	DDI2
CCDC144NL	Ankrd13d	TIMM23
SELENOT	Tatdn1	CYB561D2
SYDE2	Gucy2g	SNX12
FAM135A	Tssk3	CHEK2
ADAMTS17	Fam229a	PPP1R37
EIF4G3	4930519g04rik	NEK7
ADCK5	Arpc2	TOR1AIP1
SHC4	Wdr62	ARHGEF18
SERGEF	Nptn	TVP23A
DDX54	Il18bp	TCIRG1
NTMT1	Rbm47	STX18
PRPF38B	Arhgef2	AP1B1
[truncated: 2,319 more rows]
